# Supplementary material for: Field Observations of the Behaviour of Blackfin Reef Sharks (<em>Carcharhinus melanopterus</em>)
Source: Preprints.org preprint supplement (doi:10.20944/preprints202208.0139.v2), 2023-01-18
Supplement: Supplementary file 1 [file supplementary]

# BLACKFIN IDENTIFICATION CATALOGUE

*Blackfins identified in the Central and Papetoai lagoons,*

*North shore of Mo'orea Island, French Polynesia*

*1999 to 2005*

*as part of ethological study by Ila France Porcher<sup>1</sup>*

## Shark 1

nickname:

*Madonna*

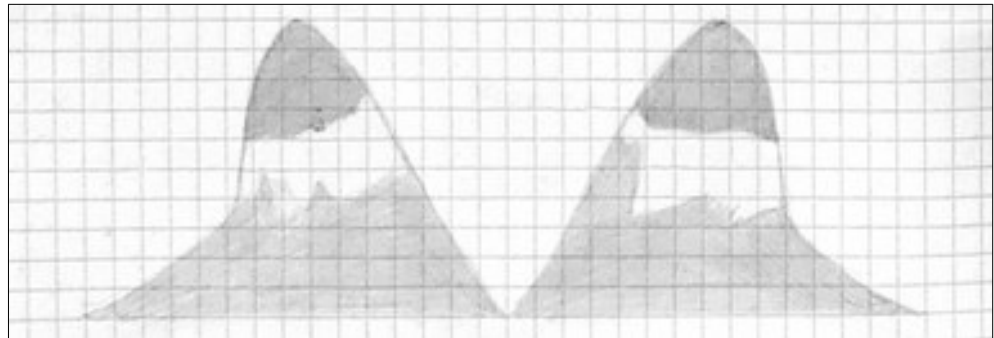

**Description:** Female; 5 feet, steel grey; after mating brown, dark grey by June. Dark grey spot 1 inch above left pectoral fin.

**Sessions attended:** 5, 7-10, 12-18, 20-33, 36-44, 49, 51-57, 59, 60, 62-64, 68-70, 72, 73, 75-95, 97, 98-104, 106-108, 110, 112, 113, 116, 117, 119, 121, 124, 126-139, 141-143, 146-153, 157, 160-174, z1, 175-183, z6, z7, 185, z8, 186-191, z12, 192-198, z16, 202, y11, 203-207, z20, 208, 209, 211-217, y14, 218-221, 223-226, 228-238, 240, 242-247, a18, a19, a20, z23, B9, a22, 251, 253, 254, a24, z26, 255, a25, z28, z30, z33, z34, z35, B37, 257, 259, 260, 261, 264, 265, 266, 268, 269, 270

**Comments:** Association with Bratworst, Martha. At 49, November 12, 1999, mated, not seen for 2 weeks. At 51 only deeper cuts still evident. A few black lines and marks by 60, December 15. Healed by 62, December 23. Had pups at 126, September 2, 2000. Mated between 143 and 146. In the vicinity of the site in the morning March to May, 01. Had pups by Oct 06, 01 (202) Mated week before 228, 02/02/02, apparently over full moon. Had pups right after Nov 19, 02. Disappeared in October, 2003. Presumed fanned.

## Shark 2

nickname:

*Bratworst*

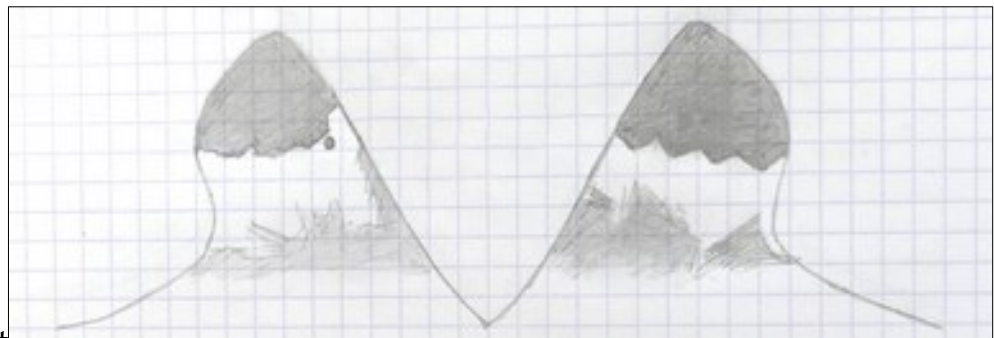

**Description:** 4.5 feet

<sup>1</sup> The original drawings were done in a book, four to a page, so in the intervening time the graphite has rubbed off on the opposite pages, resulting in the greying of many of the images. The sizes are estimates.

warm grey; light brown December. Light circle on middle of left pectoral fin; 2 light circles on right side, one above the other.

**Sessions attended:** 3-5, 7, 9, 10, 12-25, 27, 28, 31-37, 40-45, 47-54, 56-62, 64-66, 68-84, 87, 88, 90-104, 106-118, 120-137, 142-146, 149, 151-159, 161-175, 177-181, y5, 182-184, z-7, 185, z8, 186-191, z12, 192-199, z17, 202, y11, 203, y12, z18, 204-212, 215, 216, y14, 218, 219, 221-225, 228-234, 238, 240-247, O1, a19, a20, Ba3, a22, 249, z25, 251-254, a24, z26, 255, 256, z32, z33, B34, B35, B36, B38, 259, 260, B40, 261, B44, B45, 263, 266, 267-270, 272-274, 278-280, 281, a28, 283, 284, a29, 285, 286, 287, 288, 289, z38, 290, 291, z40, 292-295, z42, z43, 297, z45, 298, 299, 300, 301, 302, z48, 303, z49, 304, 305, z53, z54, z55, z56, z57, z58, z59, z61

**Comments:** Exceptionally curious; association with Martha, Fae, Madonna. Mated December 1, January 24, 2000. Had pups Oct 10th to Oct 14th-10 ½ months if she mated December 1. Mating wounds November 23rd, 2000, Dec 2, still showing cuts, Dec 24. Could find her in the a.m. near the site, March to June, 01. Had pups by Oct 06th, 01 (202) Mated week before 228, 02/02/02 (~3½ months between)

### Shark 3

nickname:

*Martha*

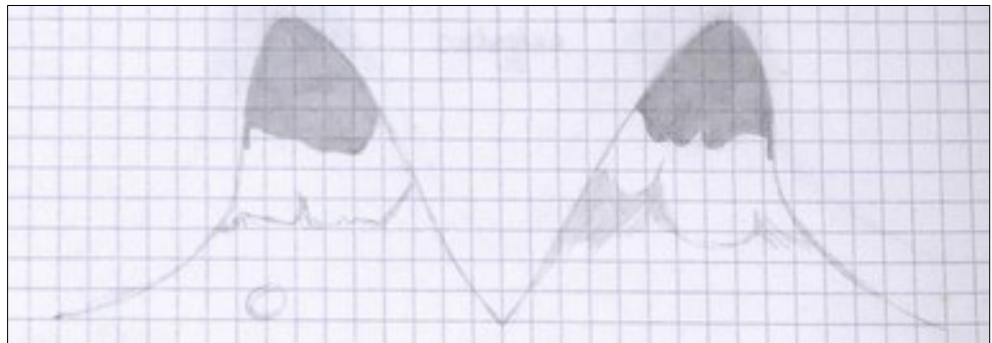

**Description:** Female, 5 feet; brown grey. Light circle on right side of dorsal fin

**Sessions attended:** 5, 6, 8, 9, 11-15, 17, 19-33, 35, 38, 40-45, 48, 49, 51-54, 56-58, 63-67, 70-80, 82-85, 91, 93-98, 100-104, 106-111, 113, 115, 116, 118-128, 130-146, 148, 150-157, 160-162, 164, 165, 167-172, y1, 174, z1, 175-184, z7, 185, z8, 186, z9, 187-189, 196, y7, 197-213, 216-219, 224-237, 240-247, a18, a19, a20, z23, a22

**Comments:** Associations with Madonna, Bratworst, Samaria, Madeline. Left 12/7-28; had pups. Mated late, March 24 to 28. Pregnant. Had pups between 12/31/00 and 01/31/01. Mated about April 2nd, 2001. Pups by 224, Jan 13th, 02. Mated a week before 240, full moon period. Disappeared during shark evacuation in August 2002.

### Shark 4

nickname:

*Avogadro*

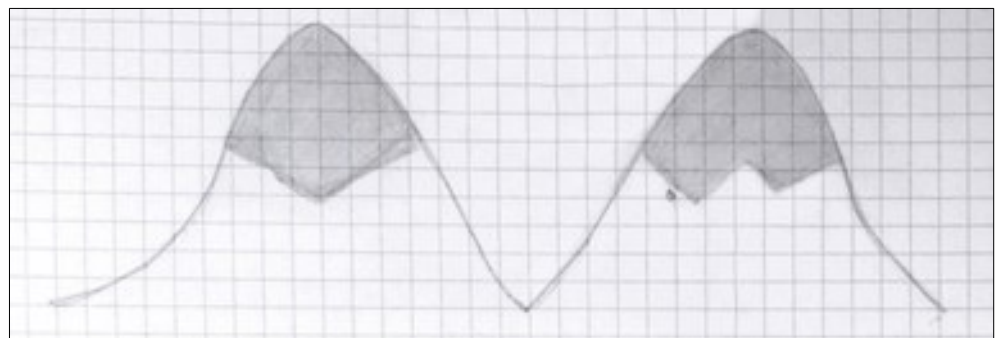

**Description:** Male, 4 feet grey; light brown in December 2000. Gold after absence between 148 and 157 while males have been mating. Grey again at 174.

**Sessions attended:** 1, 45, 48, 56, 62, 64-67, 71, 75, 77-79, 81-85, 88, 90, 91, 93, 95-97, 101-109, 112-119, 121-133, 136, 138, 139, 143-145, 148, 157, 160, 164, 167, 171, 173, 174, z1, 176, 178, B1, 179, B3, 180-183, z6, 184-187, 190, z11, 191-202, 207-211, 213, 215, 219, 223, 224, 228, 232, 233, 235, 236, 238-242, 244, 246, B5, B7-10, B15, B17-25, B28, B31-36, B38, 259, 260, B41, B43-45, 265-268, 270, 274, 280-284, 287-289, z39, 290, 291, 292, z41, 296, z45, 299, 300, 303, a38, 304, z55, z56, z59, z60, z61

## Shark 5

nickname:

*Ruffles*

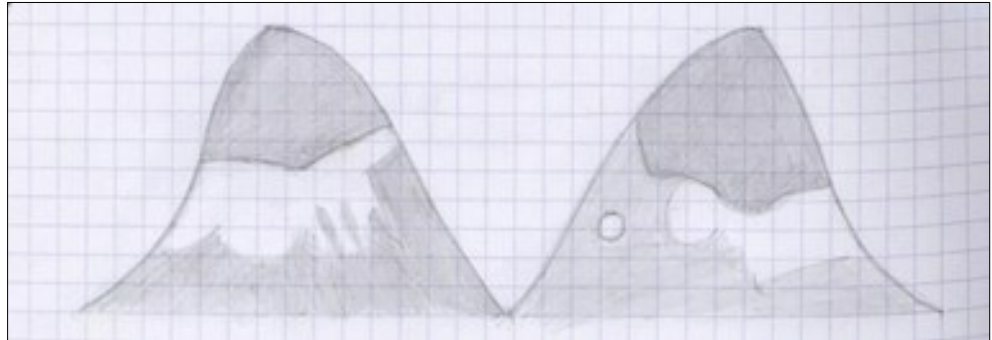

**Description:** Male; 4 feet, grey-brown; light dot base dorsal fin left side.

**Sessions attended:** 2, 21, 23-26, 31-41, 43, 44, 47, 48, 50, 52, 54, 57, 67, 69, 71, 72, 74-77, 80, 81, 83, 84, 86-88, 90, 93, 95, 96-98, 100, 101, 103-107, 110, 112-114, 116-136, 138-142, 146, 153, 154, 156, 158, 160-162, 164-169, 171, 172, 174, z1 175-183, 186, 187, 190, z12, 192-196, z13, 197, 198, 200-205, 207, 210, 211, 213, 219, 220, 222-225, 230, 232-240, 242-247, a19, a20, B9, z24, B10, B11, B13, 252-255, B18-21, 256, B22-25, B27, B28, z34, B32, B33, z35, B36-39, 260, B40-42, 261, B43-45, 264-271, 274, 279, 280, a28, 283, 284, a29, 285, a30, 286-289, z38, 290, 291, z40, 292. 293, z41, 295, z42, 296, 297, 298, z46, 299

**Comments:** Association with Meadows. Pale gold when he returned with Meadows at 153, maybe having been in the ocean mating. At 299 his pectoral fin was sliced from the tip to the top and I didn't see him again.

## Shark 6

nickname:

*Pontiac*

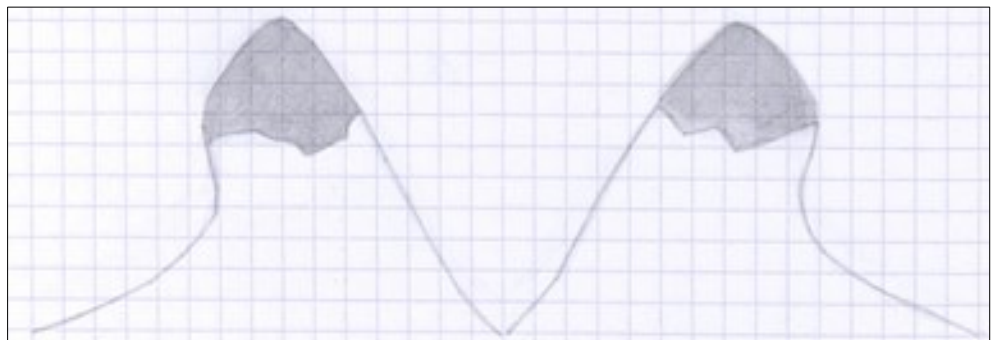

**Description:** Male juvenile; 3 feet. Group of light marks on right side under dorsal fin, with 2 small ones very close; another on line going through nose and eye, 8 inches behind eye.

**Sessions attended:** 3, 23, 26, 27, 29, 32, 33, 34, 36-39, 41, 50, 56-61, 65, 67-69, 71, 73-78, 82, 84, 86, 90, 91, 93-95, 97, 98, 100-106, 109-111, 113, 115-118, 121-132, 136, 137, 140, 146

**Comments:** He was using the area before I came on a regular basis. By 71 a scrape he acquired had obliterated the 2 marks close together on right side. 90: scrapes on back. Disappeared during absence of some other males from lagoon presumably for reproduction.

## Shark 7

nickname:

*Meadowes*

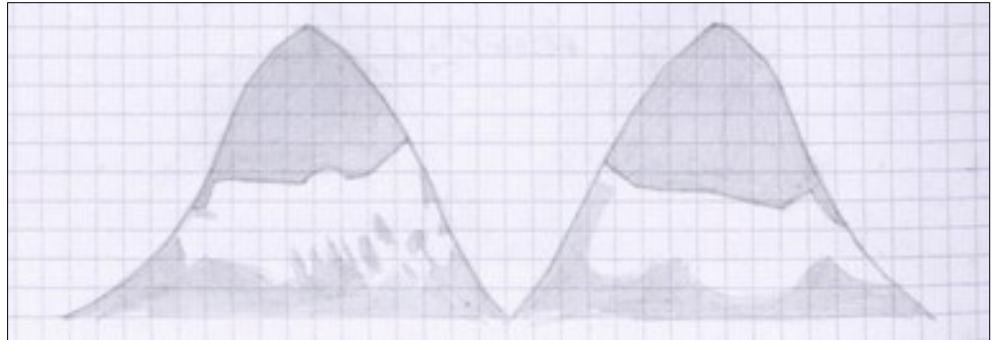

**Description:** Male; 4 feet, grey-brown. Dark blotch on left side of back two inches under front of dorsal fin.

**Sessions attended:** 7, 17-19, 21, 24, 31, 33-35, 37-39, 42, 44, 46, 48-50, 52, 53, 56-61, 63, 67-69, 72, 73, 77-79, 81, 83, 84, 86, 87, 90, 91, 94-99, 101-108, 110-113, 116, 118, 119, 121, 123, 124, 127-132, 134-136, 138, 141, 142, 153, 154, 156-158, 160-162, 164-171, 173-181, y5, z4, 182, 183, z6, z7, 185-190

**Comments:** Association with Ruffles. Pale gold when he returned with Ruffles at 153, apparently having spent time in the ocean during the mating season. Saw him April 29<sup>th</sup> and he looked normal. On May 17th 01 shaped like a tadpole, colours hardened and darkened especially noticeable on dorsal fin. At 181, June 23, his condition is worse, and this colour change has become dark blotches all over him; he is clearly very sick. Disappeared after 190, presumed dead July, 2001

## Shark 8

nickname:

*Gwendolyn*

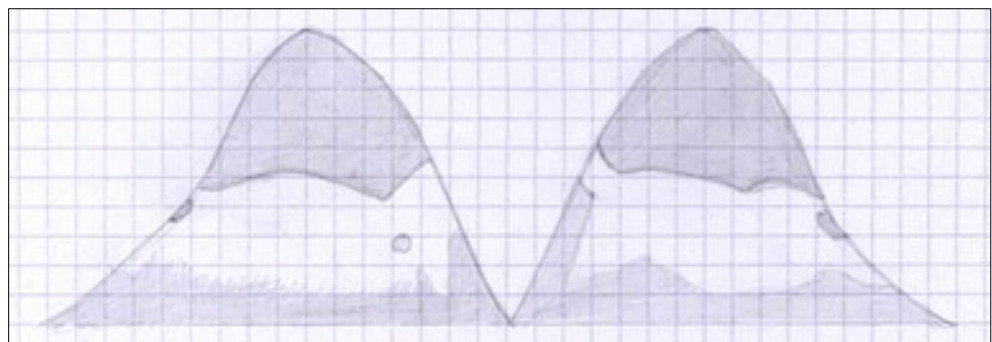

**Description:** Female; 5 feet, warm grey. Mass of scars on right side lateral marking, posterior to the dorsal fin. Dark mark on head, left side; some light marks.

**Sessions attended:** 9, 10, 16, 20, 21, 24-29, 31-39, 41, 50-61, 63-72, 74-96, 99, 101, 103, 104,

106-108, 110, 111, 113, 114, 118-137, 139, 140, 144, 147, 148, 152-160, 162-172, 174-181, z4, 183, z7, 185, 186, 188-192, 194, 195, 196, 198-200, y10, z17, 201, 202, y12, z18, 204-209, 212, 213, 215-218, 220, 222-226, 228-230, 232, 233, 234, 236-240, 242-247, O2, 255, z27, z28, a26, z30, z31, z33, 257-261, 266-275, 278, a27, 279, 280, 281, a28, 282, 286-289, a32, 290, 291, z40, 292, 293, 295, z42, z43, 296, 297, 298, 299, z47, 300-305, z60

**Comments:** 32: hole in the middle of her right side, red around it. Healed into dark line at 36. Mating wounds at 76—must have mated around February 16th. Heavily pregnant by 140; missing at 141 to 143, but in the Opunohu nursery at sunset a few days later. Had pups by 147 (December 15<sup>th</sup>, 00). Had pups between August 7<sup>th</sup> and 31<sup>st</sup>, 2001, months early. At site, noon, Sept. 16<sup>th</sup>, 01. Mated at 215, close to 213 (27/11) since cuts well healing.

## Shark 9

nickname:

*Fae*

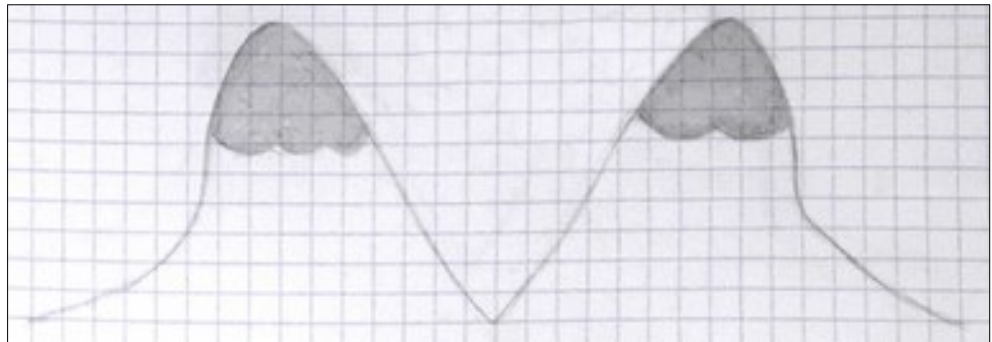

**Description:** Female; 4 feet, dark grey; Light mark on right side of back between dorsal and pectoral fins.

**Sessions attended:** 11, 12, 14, 16, 17

**Comments:** Association with Bratworst.

## Shark 10

nickname:

*Shiloh*

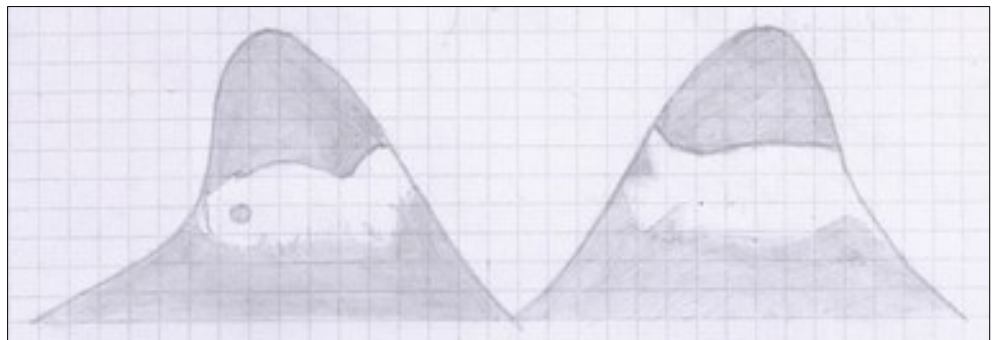

**Description:** Female; 6 feet, grey.

**Sessions attended:** 11, 12, 24

**Comments:** Heavy-set shark; pregnant.



## Shark 11

nickname:

*Natalie*

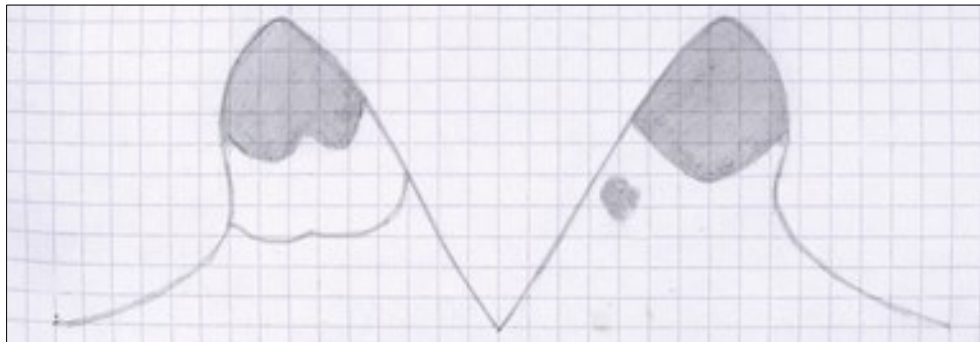

**Description:** Female; 3 feet, dark grey.

**Sessions attended:** 16, 21

## Shark 12

nickname:

*Flame*

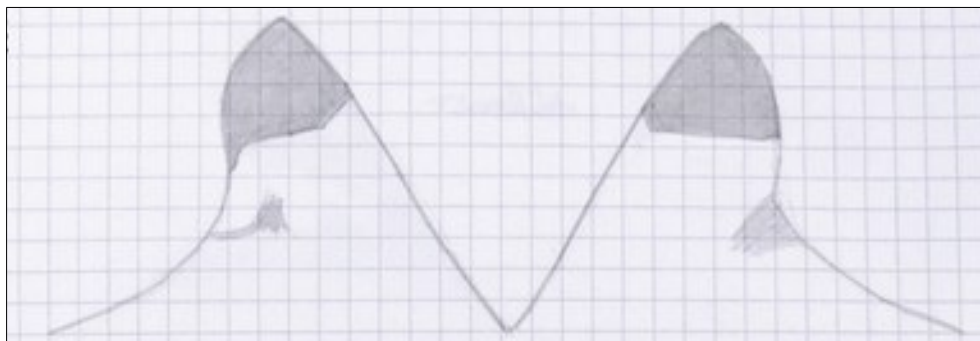

**Description:** Female; 3.5 feet, brown. Two light marks, one on either side of lateral mark right side.

**Sessions attended:** 17, 18, 26, 27, 29, 31, 32

**Comments:** Another juvenile who stayed around for a few weeks and disappeared.

## Shark 13

nickname:

*Diamond*

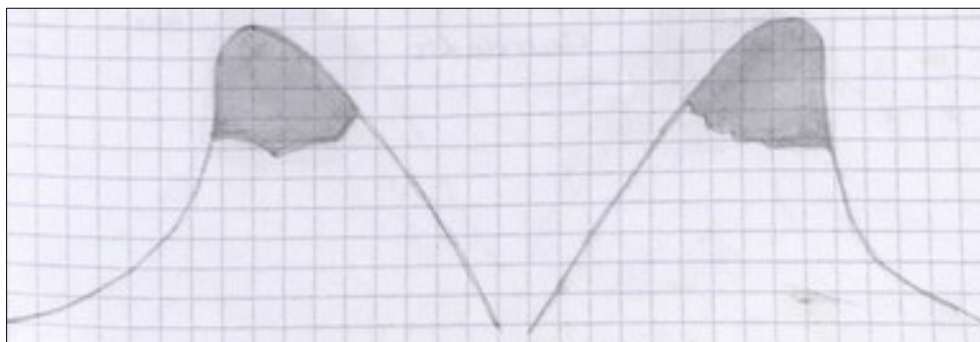

**Description:** Female; 3 feet, bronze. Many light marks; four form a diamond shape under her dorsal fin on the right side, 3 form triangle on tail, left side.

**Sessions attended:** 9, 21, 23-26, 28, 29, 31-38, 40, 41, 48, 52, 58, 61, 64, 65, 69, 70, 72, 74, 76, 78-82, 85, 91, 97, 106, 113-116, 118-125, 127, 128, 130, 131, 133, 135, 136, 138, 141, 142, 144-147, 149, 150, 152, 155-157, 160, 162-165, 167, 168, 172-181, 184-188, 190

**Comments:** By 168 she had grown considerably into a medium sized shark; still the same colour. Disappeared.

## Shark 14

nickname:

*Samaria*

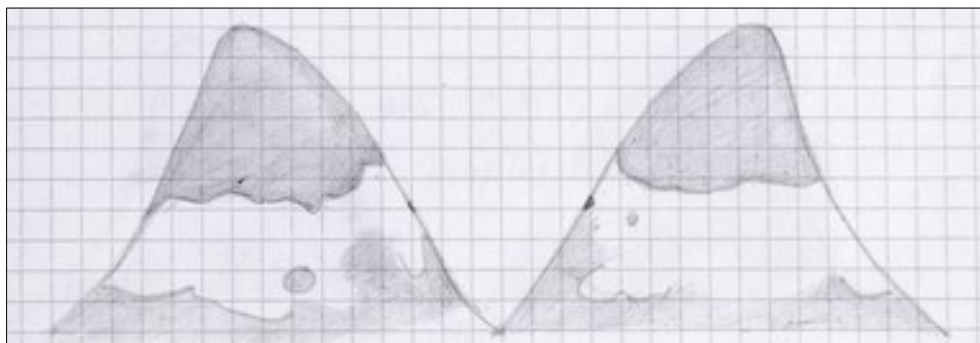

**Description:** Female; 6 feet, medium grey. No distinguishing marks.

**Sessions attended:** 23, 24, 26, 31, 33, 37, 39, 42, 44-46, 49-56, 59, 61, 65, 66, 68, 69, 73-79, 81, 82, 84, 87, 90, 93, 95, 97-101, 103, 104, 106, 107, 109, 113-119, 121, 122, 126-128, 131, 132, 134-138, 141, 143-148, 154-158, 162-169, 171, y1, 172-174, 176-179, z2, 182-184, z7, 185-190, 195, 196, y7, 199-202, y11, 203, z18, 205-207, 211, 212, 214-217, 219, 225, 228-232, 233, 236-238, 240, 241, a19, 251, 254, z27, z28, z32, B28, B29, z33

**Comments:** Heavy set, shy. Mating wounds at 68 all over her back, already starting to heal. Mated between January 4th and 21<sup>st</sup>, 2000, closer to the 4th. Very pregnant at 134, esp at 141. At 143, she had had her pups, born between Nov 17 and 24, 2000. Mated at 154, January 27, within week before. (Jan 20-24th) about 60 days in between birthing and mating. Had pups between 207, Nov 1st, and 211, November 16th, closer to 211. Mated week before 02/02/02.

## Shark 15

nickname:

*Madeline*

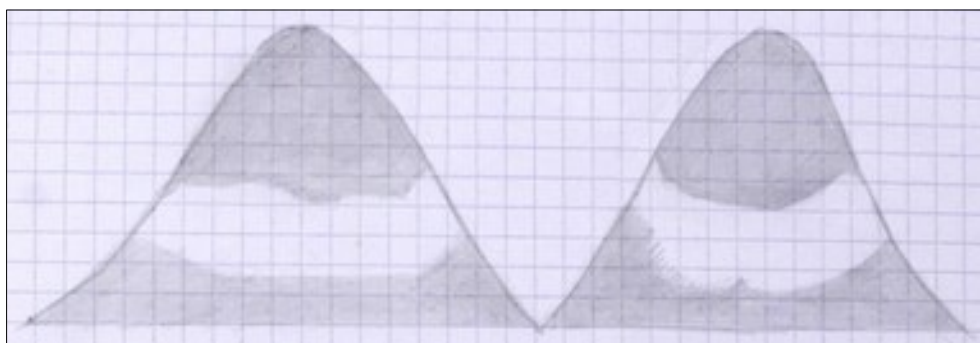

**Description:** Female; 6 feet, dark to medium grey; light brown in December 2000. No distinguishing marks.

**Sessions attended:** 15, 17, 21, 24, 25, 29, 44, 46, 47, 49-54, 58, 59, 61, 65-67, 70, 72-76, 78-80, 89, 91, 95, 96, 98, 99, 100, 102, 104, 105-109, 111-114, 116-124, 126, 127, 129-138, 140, 144-147, 149-152, 154-158, 160, 169-171, 173, 174, z1, 176-183, z6, z7, 185, z8, 186, z9, 187, 190, 191, z12, 192-196, z14, 198, z16, 199-218, 220, 222, 224-226, 228-230, 233, 234, 245-247, a19, B9, B10, 251-253, 255, 256, B22, z29-32, B29, z33, 257-261, 265, 266, 268, 270, 279, a28, 284, a30, z38, z40, 292, 293, z41, z42, z45, 298, 299, 302, z49, 305, z55, z56, z57, z58, z59, z60, z61

**Comments:** Recognize her by her behaviour; she always sweeps into the site in the same way. Companion of Samaria, range to east of Section A site. Black streak on left side of face between eye and mouth, 24. Dark mark on face nearly gone at 29. At 70, badly cut; mated about a week before. Had pups by 144—Dec. 1st Pale brown in December 2000. Mated

about January 20 to 24, 2000—cycle remarkably close to Samaria's—birthed about the same time too; two months in between. Had had pups 213. Missing March 1st to May 3rd, 2002; no sign of having mated on return.

## Shark 16

nickname:

*Isis*

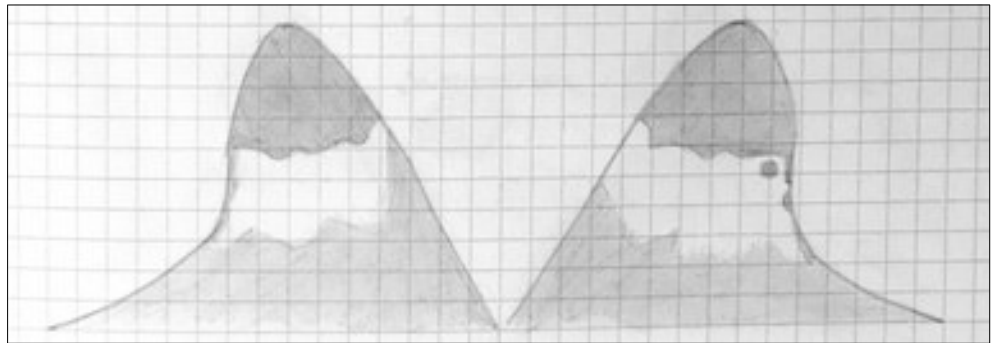

**Description:** Female; 4.5 feet, grey. In Dec. 00 light brown with the dot on white band almost invisible associated with body colour, not tip colour.

**Sessions attended:** 11, 12, 23-31, 34, 36-42, 47-61, 63, 64, 68-80, 82-84, 86, 87, 90, 91, 94-100, 102-104, 106-109, 111-130, 132-145, 147, 148, 150-155

**Comments:** Likely came between 12 and 23, before I was able to id her. Mating wounds Dec 15/99 after appearing with gang of males; had bite marks. Covered with mating wounds at 68, January 21, after being missing some time. Healed at 74. No sign of pregnancy. Disappeared at the beginning of next mating season.

## Shark 17

nickname:

*Nightwind*

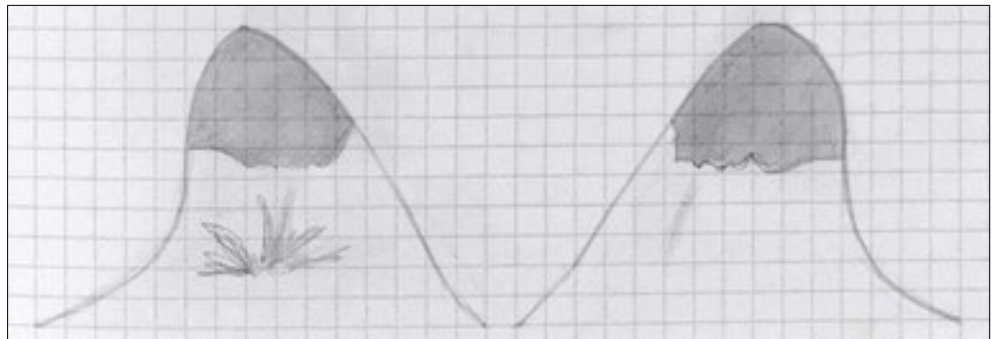

**Description:** Male; 3 feet, very dark grey. Light mark on right side of tail 2" from tip and left side in middle of base of dorsal fin; dark mark on head.

**Sessions attended:** 22, 24-26, 28, 29, 31, 32, 36, 38, 40, 50, 66, 70, 77, 86, 93, 95, 97, 104, 112, 115, 122, 124, 129, 130, 133-136, 142, 143, 146, 153, 154, 157, 163-166, 169-181, y6, 183, 185-188, 190, z11, 192, 195-207

**Comments:** Claspers beginning to grow,  $\frac{3}{4}$  inch long at 143, November 24th. In barrens June 29th, 01, very dark indeed 198. Disappeared.



## Shark 18

nickname:

*Flora*

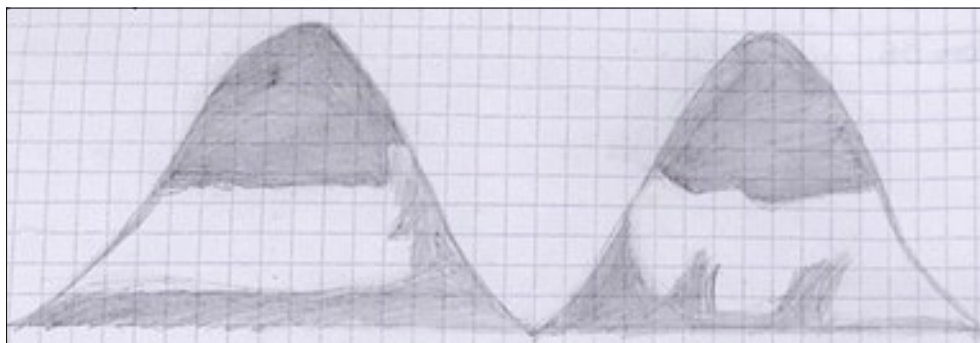

**Description:** Female; 4 feet, bronze. Large light circle on lateral mark on right side; two smaller ones above it.

**Sessions attended:** 24, 26, 27, 29, 30-34, 36-43, 46, 48, 50, 52, 53, 55-61, 67-69, 71-75, 76, 78-81, 84-87, 89, 92, 97-99, 102-104, 106, 109-114, 116-124, 126, 128, 130-136, 138-141, 144, 145, 148-150, 152-158, 160-164, 167, 169, 170, 172-183, 185, 187, 188, 190-195, 197-213, 215, 216, 222, 224-230, 233, 234, 236-247, O2, 251, 252, 254, 256, z28, z32, B32, 257, 259-262, 266, 268, 272, 273-275, 277-279, 283, 284, 286-289, 291, 293, 295, 296

**Comments:** Wound on face, left side, 38. At 67, Jan 6/00, she reappeared, after a two week absence, dark grey, with mating wounds all over back and sides: deep, gaping cuts. At 78 mostly healed. By 102, she has grown--no longer medium sized young shark. Mated a bit before 148 (Dec20/00); pregnant. Had pups Sept 12 to 21, 01, and was dramatically paler after! She was very dark grey before mating. Mated at 222, Dec 8th to Jan 11th, 02. Disappeared during finning.

## Shark 19

nickname:

*Trinket*

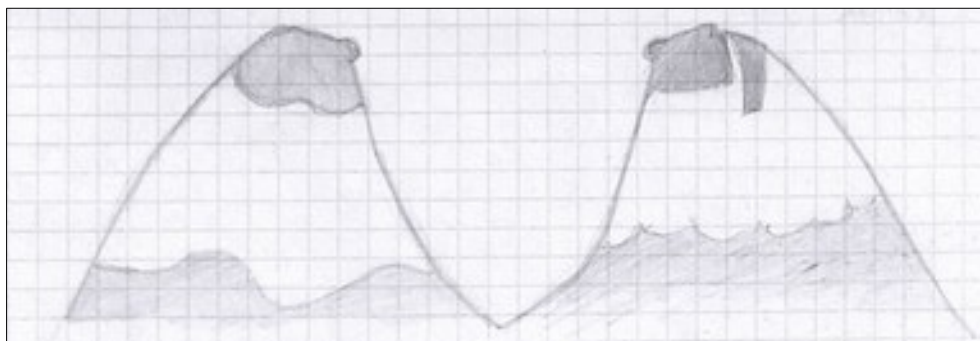

**Description:** Male; 2.5 feet, bronze—about a year old in 1999. Light mark in middle of body, right side; others.

**Sessions attended:** 24, 25, 27-29, 37, 79, 94, 95, 98, 99, 104, 107-109, 111-113, 117, 119, 121, 124, 126, 132, 133, 135, 142, 147, 150, 153, 154, 173, 174, 178, 180, 181, 191, 192, 194, 199, 202, 209, 216, 220, 240, 242, 245, 247, O2, O3, O4, O5, 286, 289, 292, 295, 296, 297, 300

**Comments:** 25: 3 in long object, about 0.5 inches in diameter, stuck in gill, right side. 28: this crustacean-like object was gone, a couple of marks left there, no injury. Has little claspers,  $\frac{3}{4}$  inch long at 173. 240: claspers more his size. Came to the BBC filming, after two years not seen in the lagoon. (286). Saw him a few times outside the reef—so he made the transition to the ocean, still a small shark.

## Shark 20

nickname:

*Tessy*

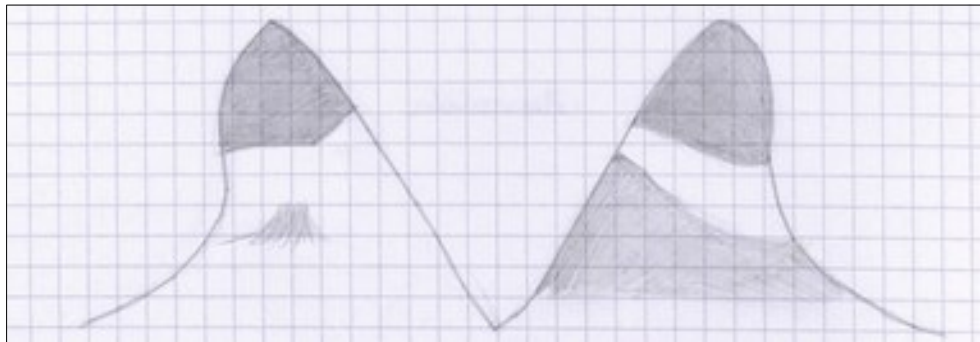

**Description:** Female; 3.5 feet, brown. Big light circle left side of tail; light dot under lateral mark left side, in line with front edge of 2nd dorsal fin.

**Sessions attended:** 23, 28, 31, 38, 41

## Shark 21

nickname:

*Morganna*

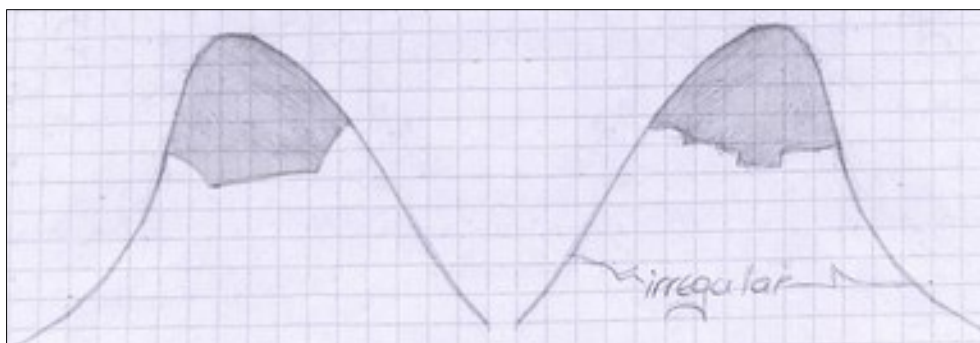

**Description:** Female; 6 feet, grey.

**Sessions attended:** 25

**Comments:** Especially large and heavy-bodied shark; pregnant.

## Shark 22

nickname:

*Christobel*

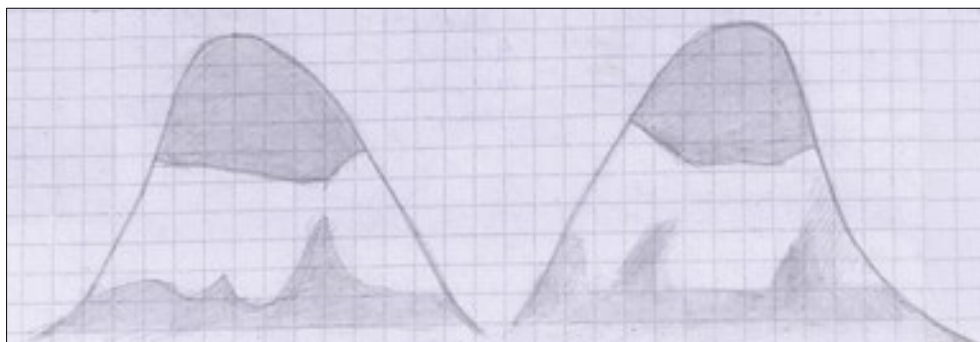

**Description:** Female; 4 feet, light bronze when identified, just maturing. Not a single identifying mark.

**Sessions attended:** 25, 26, 29, 33, 34, 38, 40, 43, 49, 51, 56, 59, 64, 65, 67, 70, 73, 77, 80, 81, 83, 84, 86, 90, 91, 93, 94, 97, 99, 101-114, 116-130, 132-146, 150, 153, 154-157, 160, 162, 164, 166-186, 188-192, 196, 198-201, 204-206, 208-210, 212, 213, 215-219, 223, 224, 228, 230-234, 238-241, 246, B10, 251, B15, 253-255, B19-21, 256, B22, B24, B26, z32, B28, B31, z34, B33-38, 259, B41-44, 265-267, 269-271, 274, 275, 278, 279, 281, a28, 283, 285, a30, 286, 287, 291, z40, z41,

295-297, 299, 301, 303, 304, z54, z55, z56, z57, z58, z59, z60, z61

**Comments:** At 65, January 2, 2000, covered with deep mating wounds. At 70, January 29, only the worst cuts still showing. No pregnancy. At 150, mating wounds. Mated Dec 7th to 15th approx. Has developed a much heavier build. Pregnant May /01. Had pups by 204, October 17, 01. One bite mark at 224. Mated week before 02/02/02 (228).

## Shark 23

nickname:

*Kilkenny*

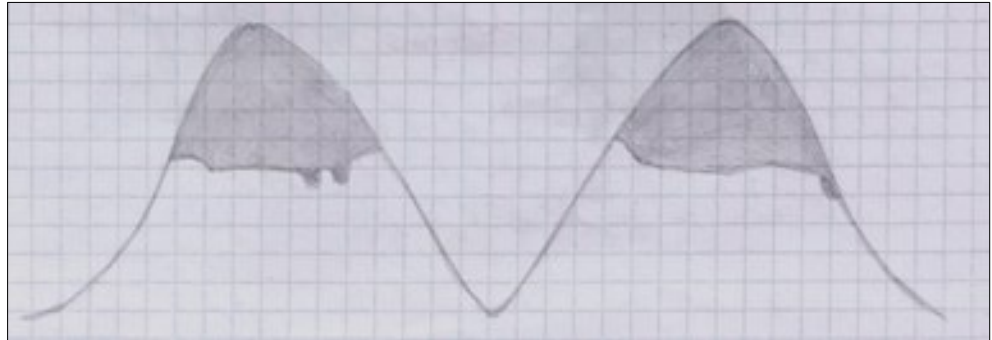

**Description:** Male; 4.5 feet, light brown. Large light dot under dorsal fin and black dot under 2nd dorsal fin on left side.

**Sessions attended:** 26, 43, 105, 113, 114, 117, 118, 124, 128, 154, 176, 187, 190, z11, 193, 194, 198, 199, 203, 213, 219, 229, 230, 231, 244, 245, B4, a19, B8, 251, 254, B27, B28, B35, B37, 261, 265, 266, 269-271, 280, 282, 287, 291, z40, 292, 293, z41, 295, z42, 296, 297, 298, 301, 303, z52, z54, z55, z57

**Comments:** Possible association with Marco; often in the area at the same time. 296: blotches noted on his skin. 297 looked okay during the brief look I had—fine at next sighting; perfect skin.

## Shark 24

nickname:

*Lillith*

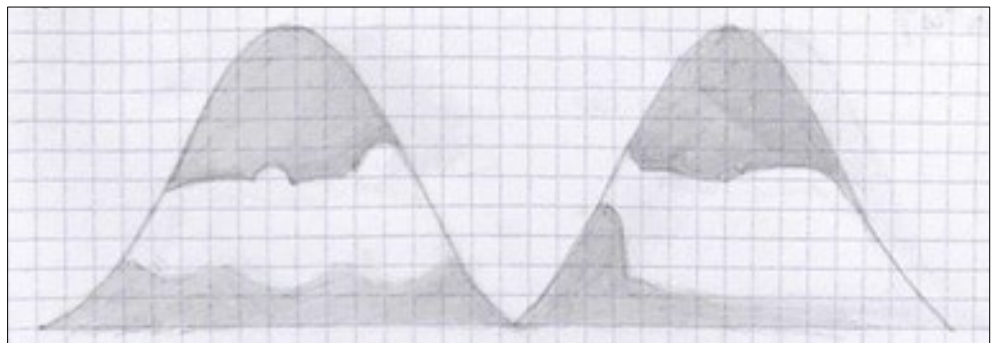

**Description:** Female; 6 feet, dark grey. Blotchy area on left side a foot in front of tail; light mark on tail, right side, near tip.

**Sessions attended:** 27, 33, 38, 42, 46, 48, 58, 61, 65, 69, 70-72, 75, 76, 105, 113-115, 118, 122, 123, 128, 129, 133-135, 138, 139, 146, 153, 154, 161, 163-169, 174, 176, 177, 180, 181, 183, 185, 190, 196, z14, 197, 201, 203, 204, 207, 208, z20, 209-212, 214, 215, 222, 223, 225, 227, 228, 230, 233, 235, 238, 242, 243, 247, z22, B10, 251, 252, B20, 257, 259-261, 263-268, 270, 271

**Comments:** Shy at first. When id'd she had a dark mark on the left side of her head which subsequently vanished. Pregnant at 27. At 69, she had no mating wounds; at 70, was

covered with them. Mated between January 24, and 29, 2000. Pregnant—had pups between October 18th and November 3rd, 2000, so gestation period was 8 months and 20 days to 9 months and 2 days. Mated around Jan 10th, 01. Coming just as it gets dark 161 to 169 and has a white flake close to her body on her left pectoral fin. Had pups between 204 and 207 (Oct 17- Nov 1st, 01). Mated 215 to 222; Dec 4th to Jan 11th, 02, just before I saw her again, so Jan 6th +or- 1 day. She is still dark grey Jan 02, while all of the sharks are pale brown or gold. 238, (March 27th, 02), she has rashes of white markings, as though dusted with small snowflakes, especially in regions 2 x 8" over gills on each side; but scattered elsewhere too. Next seen April 20, at 242—fewer of the white flakes—just on her right gill, a 1 inch thick line of them, with a bit of mottling on the midline forward of her tail and on the trailing edge of the tail itself. Elsewhere clear of the white flakes.

## Shark 25

nickname:

*Nessie*

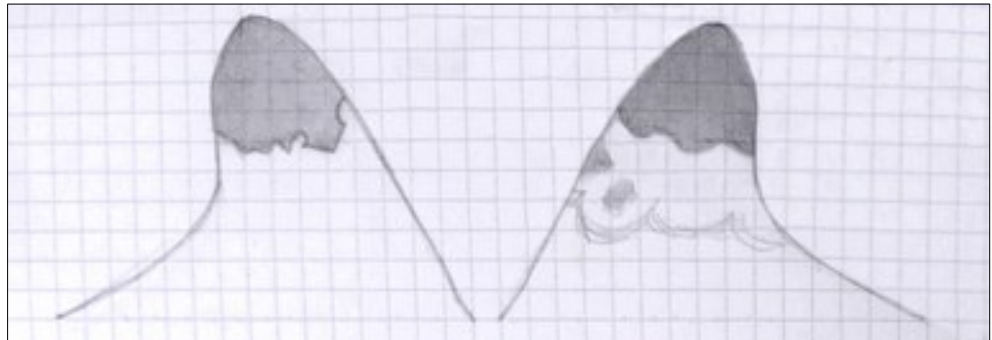

**Description:** Female; 4 feet. Light circle on lateral mark left side, under back edge of dorsal fin; light mark at base of tail, right side, a bright one on gills, right side.

**Sessions attended:** 26, 27, 30-32, 38-42, 48, 136

## Shark 26

nickname:

*Dorian*

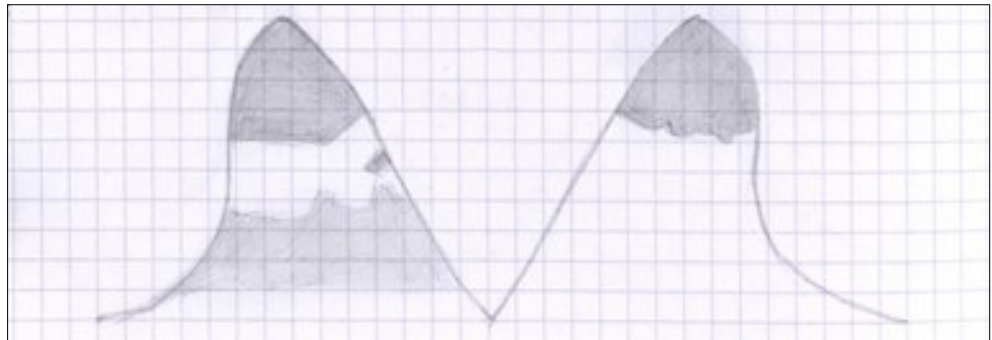

**Description:** Male; 4 feet, pale creamy brown. Two light dots on head, and one in line with front curve of dorsal fin.

**Sessions attended:** 27

**Comments:** First big adult male to attend a session

## Shark 27

nickname:

*Tiddlywink*

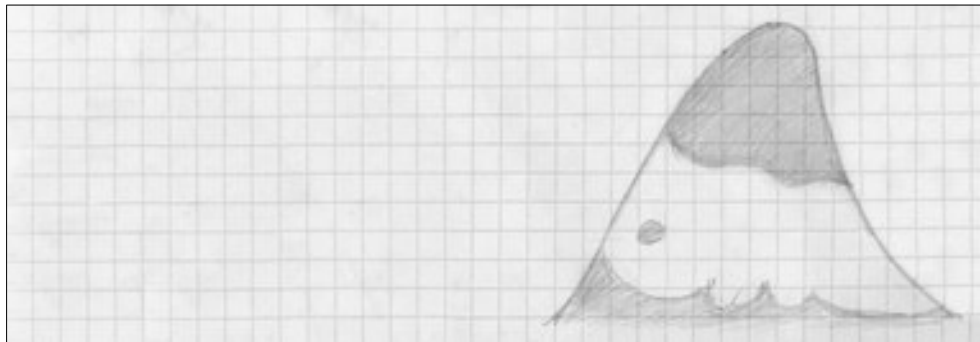

**Description:** Juvenile female; 3 feet, grey. Light mark between pectoral and dorsal fins on the left side, 2 light marks on right side, 3" spaced.

**Sessions attended:** 27, 33, 36, 37, 39, 42-44, 46, 47, 51, 54, 56, 62

## Shark 28

nickname:

*Bethel*

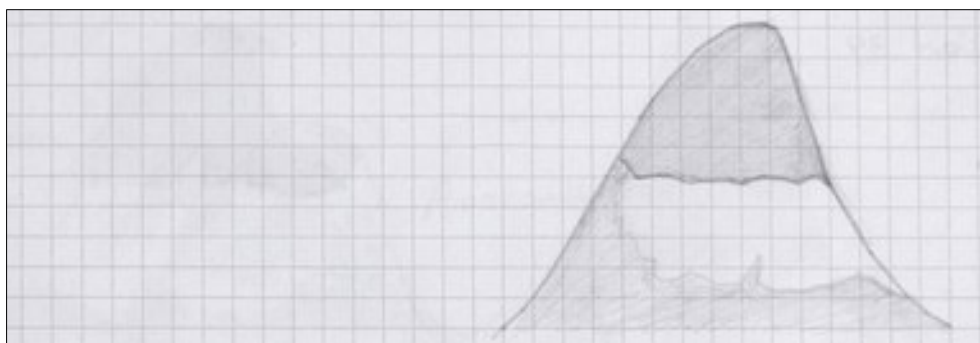

**Description:** Female; 5 feet, grey. No distinguishing marks; tip lines straight both sides.

**Sessions attended:** 28, 29, 40-42

## Shark 29

nickname:

*Sybil*

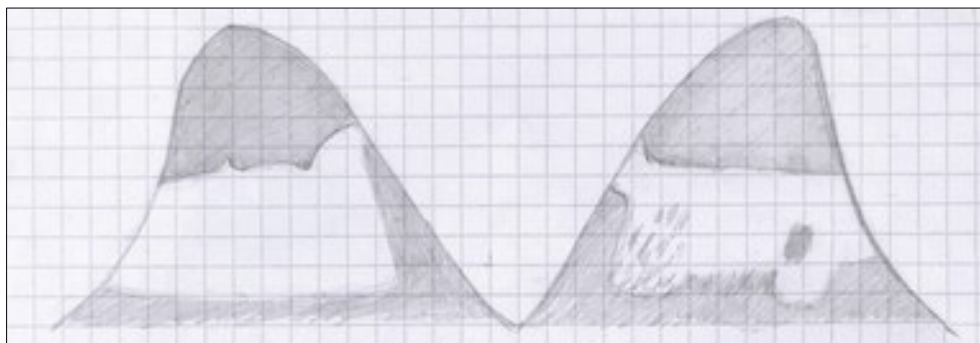

**Description:** Female juvenile; 3.5 feet, brown. Light dot under lateral mark, left side; 2 marks 3 inches apart on right side.

**Sessions attended:** 28, 33, 34, 41, 77, 80, 82, 84, 85-87, 90, 91, 93-95, 97, 99, 102, -114, 116, 117, 121-125, 127, 128, 130, 132-139, 141-143, 146, 149, 150, 152-158, 160, 162, 164, 166, 167, 169-171, 173-185, 187, 189, 191, IC-12, 192, 195, 197, 198, 202-211, 213- 217

**Comments:** Maybe 4 feet at 106. She was a small juvenile when I met her, then left and returned months later at 77. Some mating wounds at 141, Nov 17, 2000; pregnant. Had pups between September 12th and Oct 06, 01. Disappeared.



## Shark 30

nickname:

*Azrael*

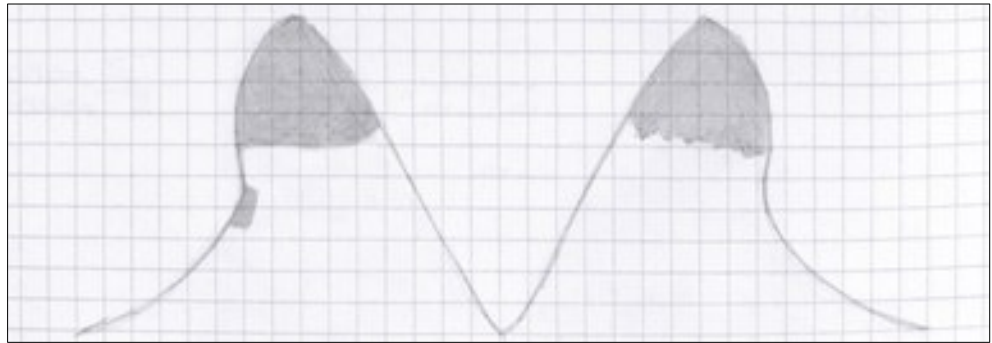

**Description:** Male; 4 feet, grey. Light dot on right pectoral fin, 1.5 inch black circle on ventral surface of nose.

**Sessions attended:** 30,45

**Comments:** Likely scrape on ventral surface of nose healed and disappeared rather than being a permanent mark.

## Shark 31

nickname:

*Triangle*

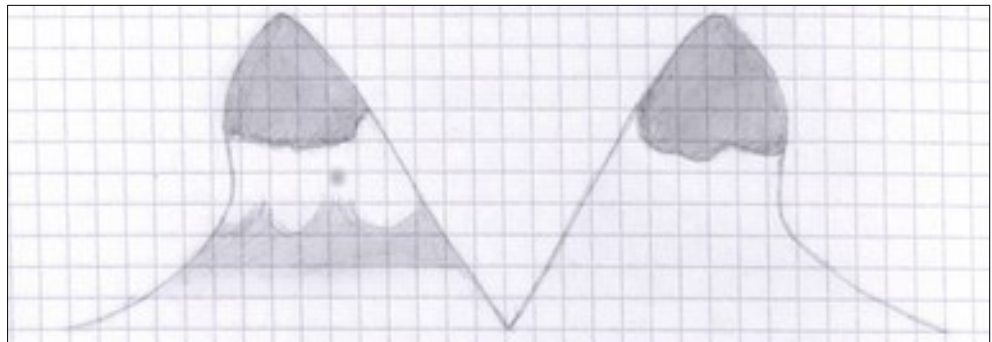

**Description:** Male; 3.5 feet, brownish; 3 light marks on back on right side of trailing edge of dorsal fin forming 2 inch triangle.

**Sessions attended:** 32,33

**Comments:** Like Azrael, another young shark who appeared briefly in the area and left.

## Shark 32

nickname:

*Cascade*

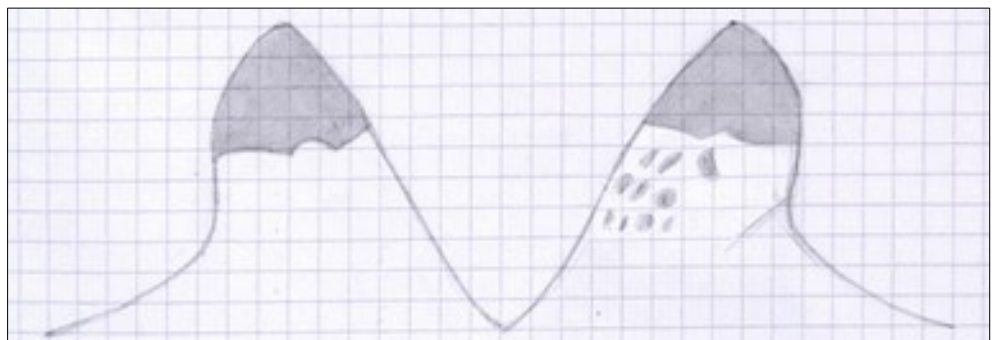

**Description:** Female; 5.5 feet, grey.

**Sessions attended:** C2

## Shark 33

nickname:

*Princess*

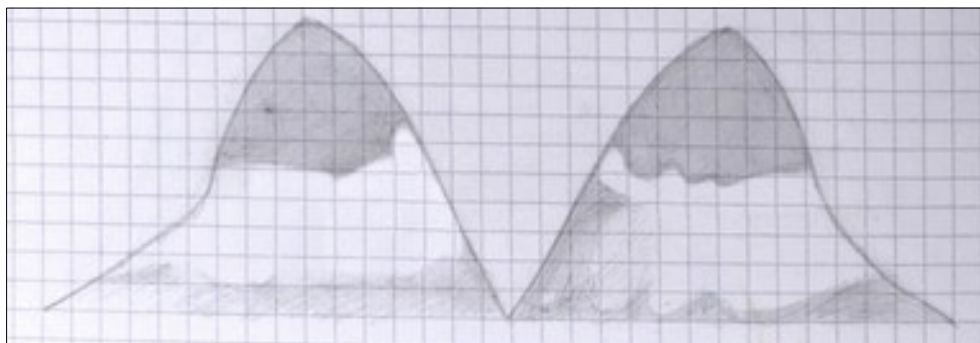

**Description:** Female; 6 feet, grey. Irregular black mark on ventral fin, left side.

**Sessions attended:** 32, 45, 47, 61, 67, 77

**Comments:** Very pregnant at 45. At 77 healing mating wounds; mated 1 to 3 weeks ago.

## Shark 34

nickname:

*Annaloo*

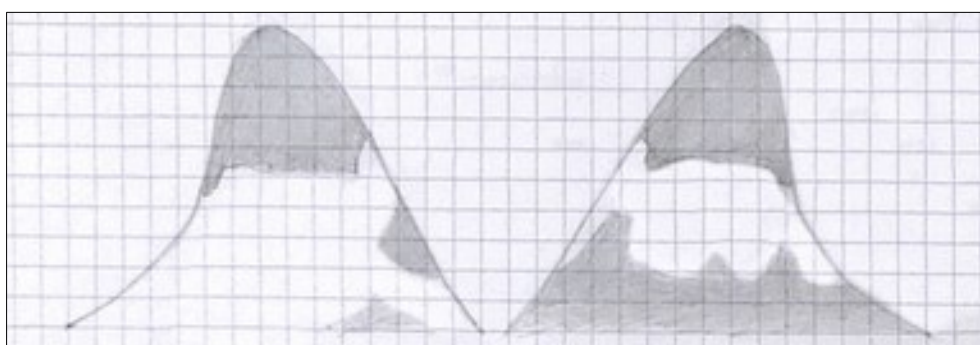

**Description:** Female; 5.5 feet grey. After 201, piece cut out of the front of dorsal fin, removing points.

### Sessions

**attended:** 33, 35, 59, 83, 105, 106, 108, 111, 113, 115, 117, 119, 120, 121, 124, 134, 137-139, 144-147, 150, 152, 154, 155, 163-165, 167, 168, 174-176, 179-183, z7, 185-190, 192-195, 201, 204-209, 211, 213-216, 220, 224-226, 228, 230, 232, 233, 235, 236, 240-242, 244- 247

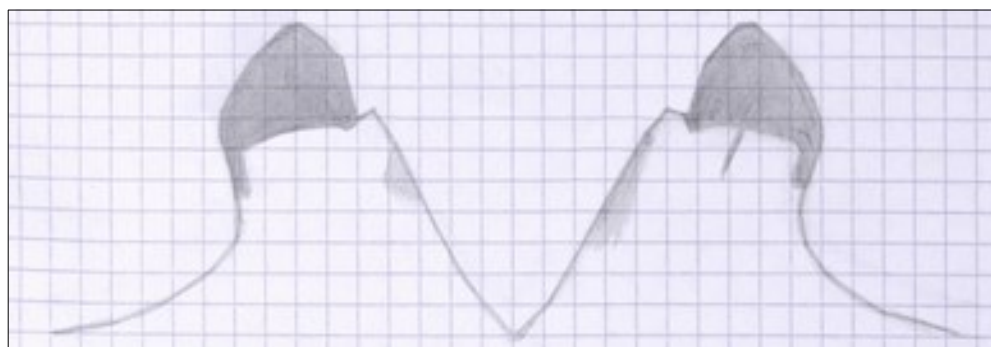

**Comments:** Passed within 2 feet on our first meeting in a curious way. At 106, she just glided past when I was looking the other way, and continued to do so until 163! Association with Glammer. 137: bite marks. 144: covered with mating wounds. Had pups at 201, returning with piece cut out of the front of dorsal fin as seen above. Finally starting to really heal at 213, black line disappearing, front of fin filling in. Mated Dec 8 to Jan 6, 02, probably between Dec 20 and 30. Disappeared during shark evacuation in July-August 2002.

## Shark 35

nickname:

*Muffin*

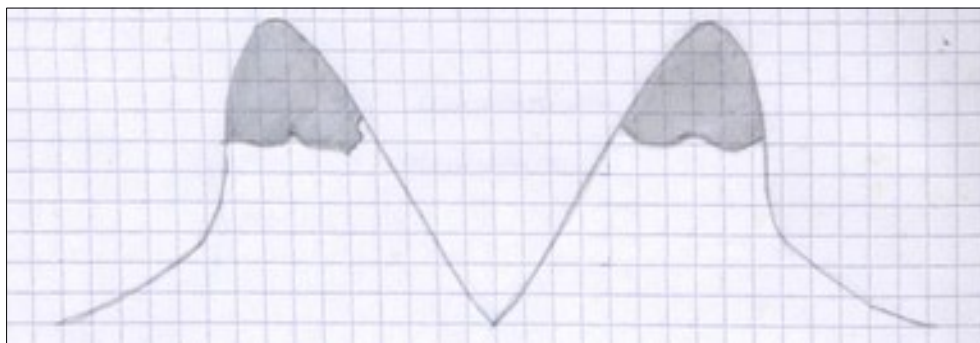

**Description:** Male juvenile; 3 feet. Dots right side.

**Sessions attended:** 33, 36, 43, 49, 53, 157, 167, 168, 170, 171, 174, 176, 177, y3, 180, 183, 185-187, z12, 192-203, y12, 204, 206, 207, 209, 210, 212-214, 216-218, 220, 225, 227, 228, 231-235, 237-243, 245, 246, a19, B9, B10, B15, 255, B19, 256, B24, z29, B25-27, z31, B28, B31

**Comments:** Little claspers just 2" long at 157.

## Shark 36

nickname:

*Chevron*

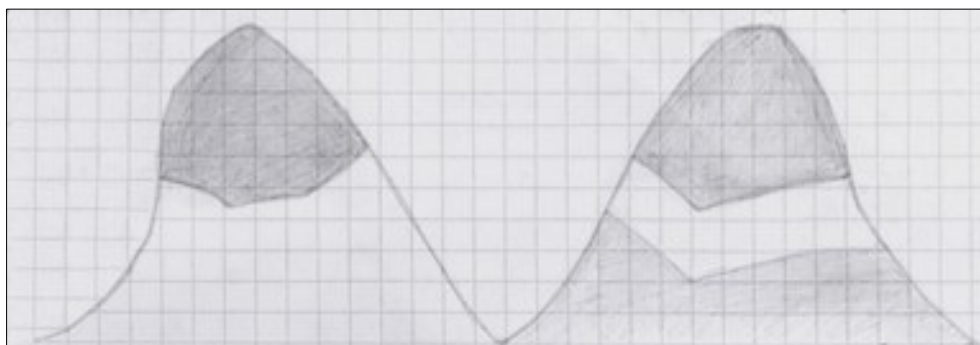

**Description:** Female; 3.5 feet, deep bronze/rust. 3 small dots in a 1 foot long row, left side, below dorsal fin; only 1 is visible from a distance.

**Sessions attended:** 33, 83, 86, 87, 91, 93-97, 99, 102-104, 106-114, 116-122, 124, 128, 130, 132, 134-138, 142, 144-154, 156-182, z7, 185, 186, 188-190, z12, 192, 194-199, 201-205, 207-209, 215, 216, 219, 220, 223, 224, 226-234, 236-238, 240, 241, 243-246

**Comments:** Identified when small at 33; she left and returned at 83. Attended 26 sessions in a row. She had mated at 215, 4/12/01, 2 or 3 weeks before. No pregnancy. Bold shark, leader in the slamming incidents the following warm season. She was always the same colour. Disappeared after I changed sites.

## Shark 37

nickname:

*Peanut*

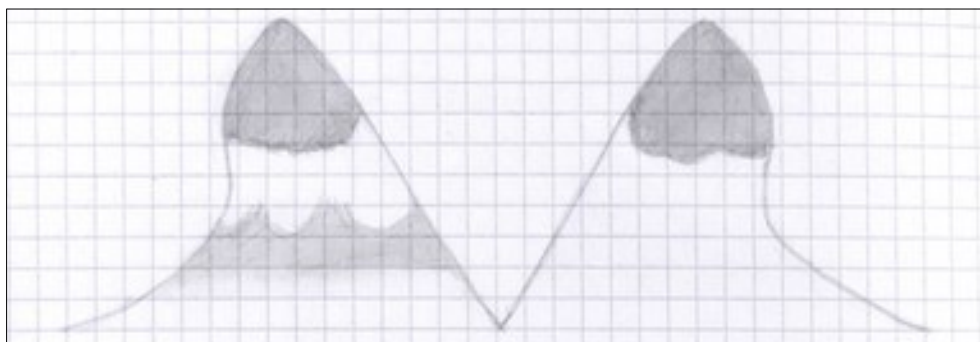

**Description:** Female; 3 feet, medium brown. Peanut-shaped 2 inch long light mark on her back on the right side, in front of and below the dorsal fin

**Sessions attended:** 33

### **Shark 38**

nickname:

*Carmelle*

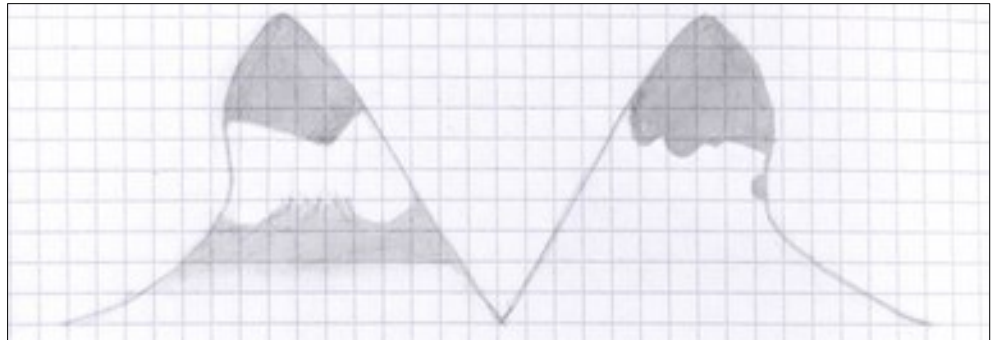

**Description:** Female; 6 feet, bronze.

**Sessions attended:** 37, 43, 50, 52, 54-57, 59, 61

**Comments:** Enormous young shark, beautiful satin light bronze skin. Area below lateral marking mixed with black pigment forming special colouration—a two-toned shark. At 50 she stayed long, hanging around me, passing repeatedly very close, as though she had just discovered me and was curious about me. She stayed in the area for a few weeks and left, never to return.

### **Shark 39**

nickname:

*Martha look-alike*

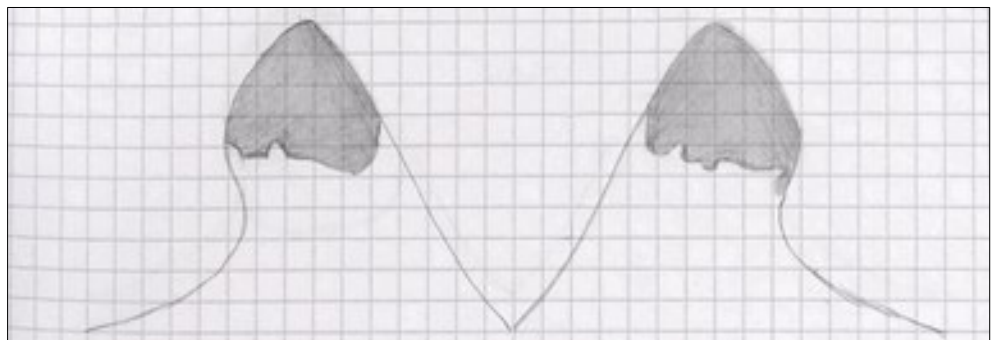

**Description:** Female; 4 feet, grey. Dorsal fin like Martha's; spray of light dots along back behind dorsal fin left side.

**Sessions attended:** 37, 42

### **Shark 40**

nickname:

*Madonna lookalike*

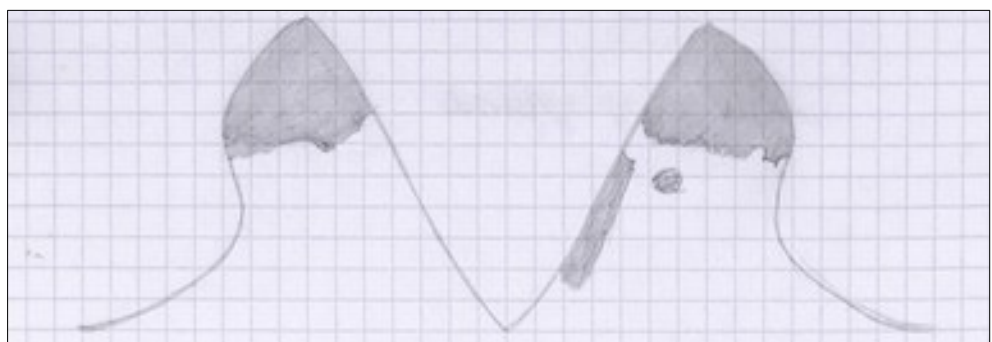

**Description:** Female, 5.5 feet, grey, reminiscent of Madonna, including dorsal fin patterns.

**Sessions attended:** C1,C2,C3

**Comments:** A shy shark. Never learned the vicinity of her home range; seemed to be just passing through Section C when I happened to be there.

## Shark 41

nickname:

*Pixie*

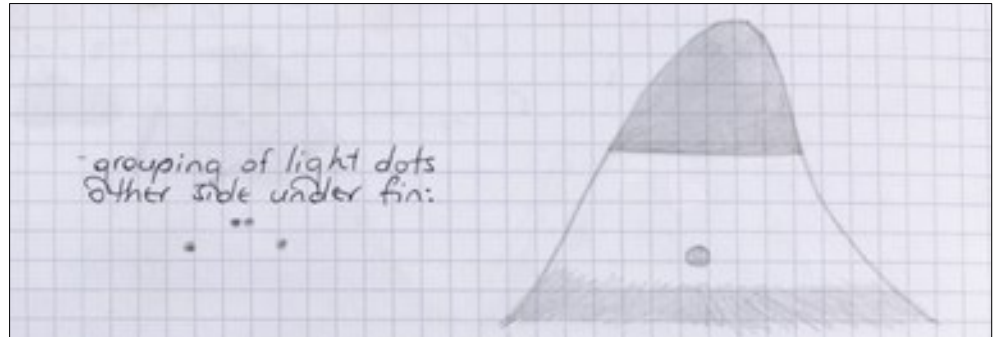

**Description:** Pup, 2.5 feet, bronze. Four light dots on right side, 2, 1 cm apart, the others on either side within 2 in. White band defined by straight lines, with a black dot in the middle. Dot at base dorsal fin, another below.

**Sessions attended:** 37, 39, 40, 42

**Comments:** She came with Fawn and the two pups interacted then and at subsequent ones when they came together.

## Shark 42

nickname:

*Fawn*

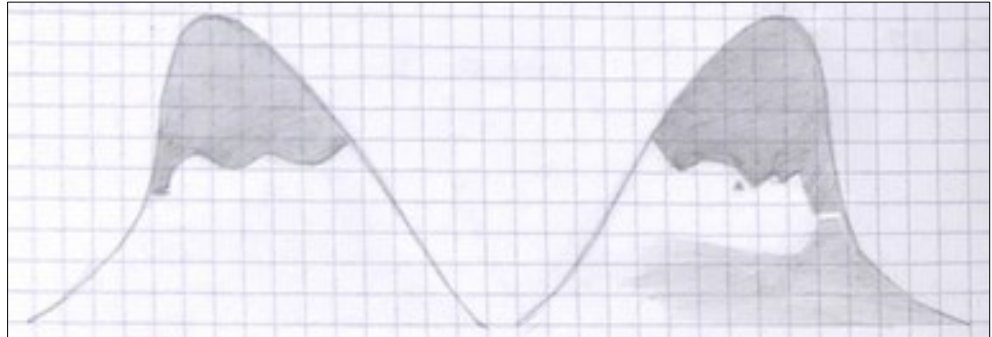

**Description:** Pup; 3 feet, brownish when encountered first. Grew into bronze male shark. Narrow white band on dorsal fin lined by thick black line down back edge, and on left side, a black dot on tip of point.

**Sessions attended:** 37-40, 95-97, 103-105, 109-123, 125, 126, 128, 129, 131-136, 138-147, 149-151, 153-156, 158, 162, 165-170, 172-184, 185, 188, 190, 196, z15, 197-199, 201-207, 209, 212-216, 219, 220, 225, 226, 229, 231, 232-238, 241-245, B9-11, 252, B17, B19-21, B23, B24, B26, B27, B31-38, 257, B39-42, 261, B43, B44, 266, 267, 269-272, 279-282, 284-287, 289-292, z41, 295, z42, 296, 297, 298-305, z54, z56, z57, z58, z59, z60, z61



## Shark 43

nickname:

*Vincent*

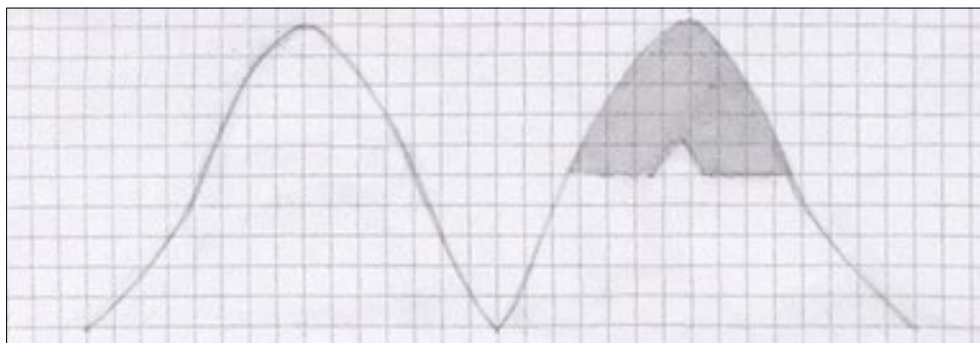

**Description:** Male; 4 feet, grey. Prominent black mark on ventral fin left side.

**Sessions attended:** 37, 52, 55

**Comments:** 52: two holes in left side, healing, one 6 inches above other, mid body, under dorsal fin. Not bites.

## Shark 44

nickname:

*Claire*

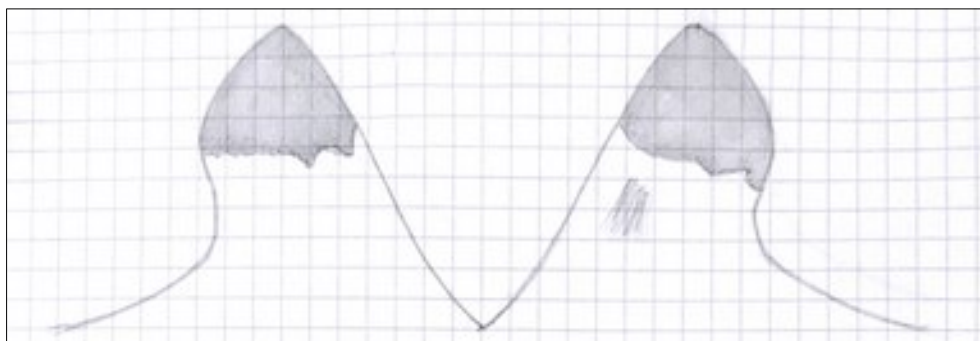

**Description:** Female; 3.5 feet, grey-brown.

**Sessions attended:** B45

## Shark 45

nickname:

*Valentine*

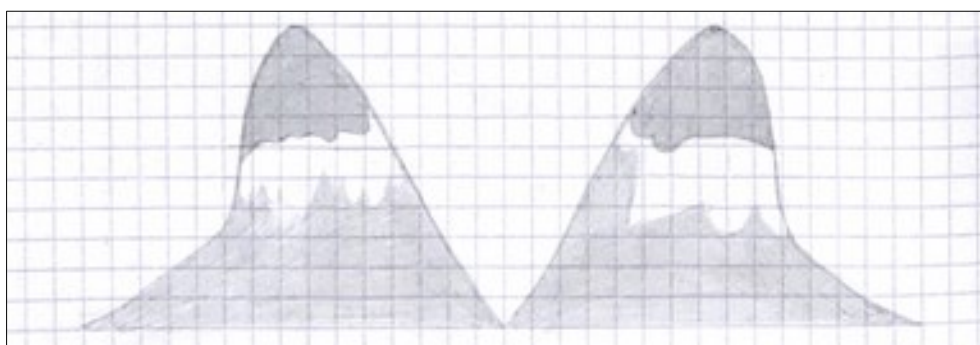

**Description:** Female; 5 feet, steel grey.

**Sessions attended:** 12, 28, 29, 39, 42-46, 48-51, 53-55, 57, 59-61, 63-66, 68, 69, 78, 80, 94-100, 102-104, 106-108, 110, 111, 113, 116, 118-123, 127-131, 133, 136-138, 140, 141, 143, 144, 149, 162, 175-176, 178, 180, y5, 182, z7, 185, z8, 187, z9, 188-190, 194-196, z13, 197-200, 202-205, 207, 209, 212-216, 228, 234, 236-238, 242, 243, 247, a18-20, z22, a21, a22

**Comments:** Suddenly stopped coming to sessions in the middle of the mating season, returning Feb 24, 2000, after 1 month. (69 to 78). She had healing mating wounds 2 or 3

weeks old. Left again and returned March 12<sup>th</sup>, 01; wounds 1 to 2 weeks old, then she was gone until June. Had her pups by 228, 02/02/02, returning after full moon to 234. Two deep cuts dorsal fin right side 242. Mated 2-3 weeks before. Mating wounds same age as Martha's, maybe mated over full moon as she did. Disappeared with Martha during shark evacuation.

## Shark 46

nickname:

*Gabriel*

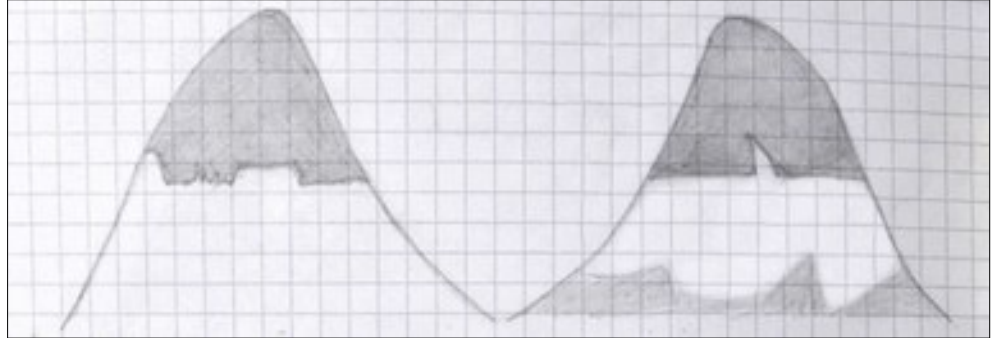

**Description:** Male; 4 feet, gold. Black dot in middle of right side, a black blotch 1 cm long near leading edge of tail 3 cm from the tip left side.

**Sessions attended:** 39, 61, 83, 166, 205, 206, 213, 223

**Comments:** October 10, 99, December 20, 99, March 12, 00, April 02, 01, October 26<sup>th</sup>, 01, November 27<sup>th</sup>, 01. Seen south of the site rubbing a remora off his ventral surface on a smooth coral head. Comes from the ocean given his colouring.

## Shark 47

nickname:

*Keilah*

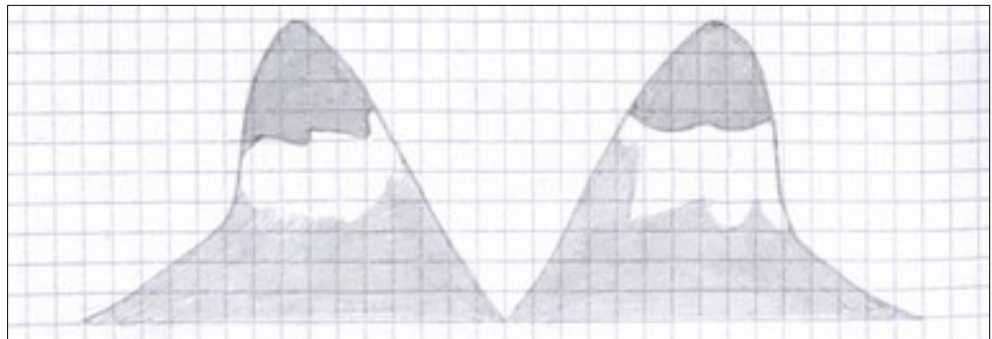

**Description:** Female; 6 feet, grey. No distinguishing marks.

**Sessions attended:** 38-43, 49

**Comments:** Starting at 38, she just passed into visual range and out again down-current, each time looking and not approaching till 42, (eve) when she joined in right from the start.

## **Shark 48**

nickname:

*Tinkerbell*

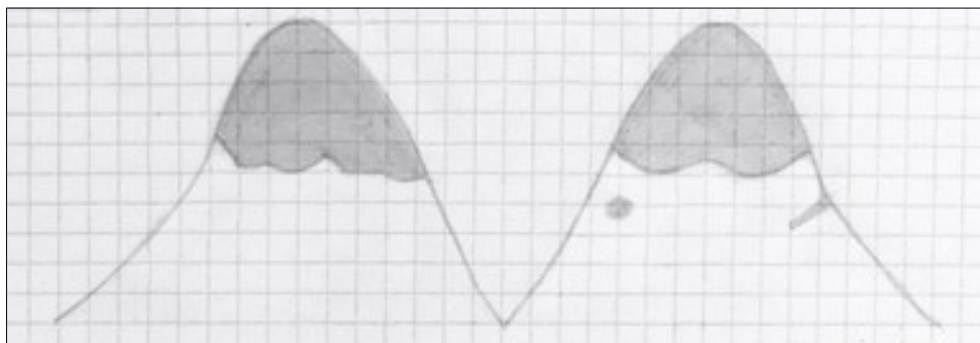

**Description:** Female; 3.5 feet, brown. Light mark above pectoral fin right side.

**Sessions attended:** 39, 40, 42, 43, 44

**Comments:** Another juvenile who stayed in the area for awhile and then moved on.

## **Shark 49**

nickname:

*Honey*

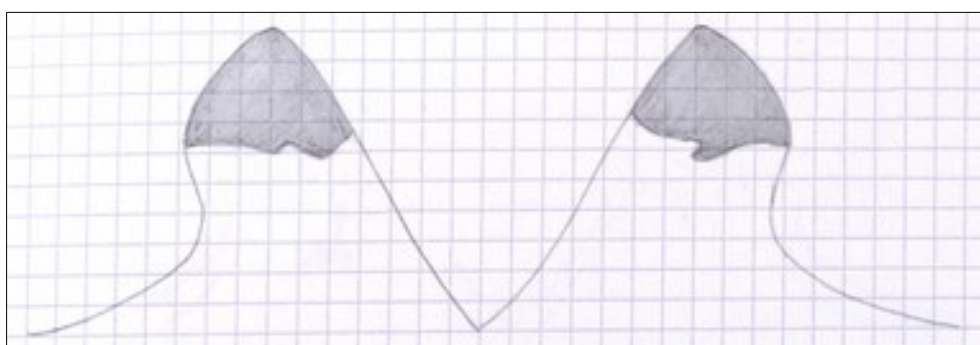

**Description:** Female; 4.5 feet, light brown. Light marks at tail base, right side, in line with 2nd dorsal fin, one on ventral fin. Lower edge of white band on dorsal fin blurred into the white.

**Sessions attended:** 40, 41, 42, 48, 50

## **Shark 50**

nickname:

*Amaranth*

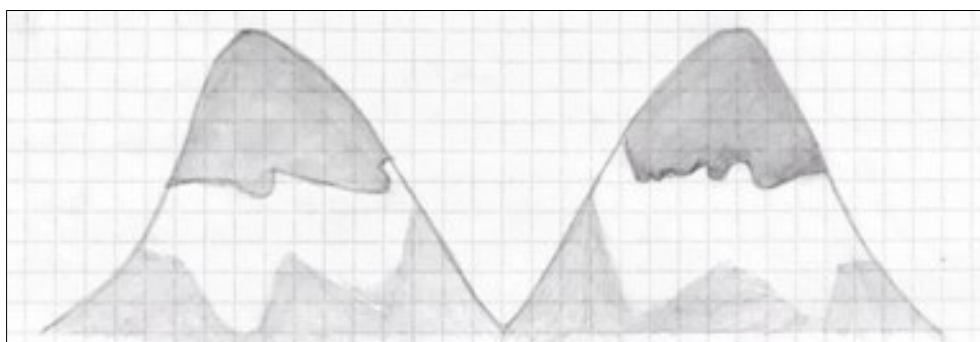

**Description:** Female; 6 feet, quite light warm grey, almost mauve.

**Sessions attended:** 42-44, 48-50, 54, 56, 57, 61, 62, 64-66, 68-72, 75-80, 90, 91, 102, 104, 106, 107, 111-118, 120, 121, 123, 126, 128, 130, 132-135, 138, 141, 144-146, 152, 154-158, 160-162, 164, 166, 173, 174, 176, 177, y2, 179-181, z4, 182-184, 186-198, z16, 199, 200, 202, 203, z18, 204, 207, 209-212, 219-221, 226, 228-233

**Comments:** Mating wounds at 90; mated 2 to 3 weeks before, in the 2nd week of March,

2000. In the first photos of her she was pregnant, so birthed in the 99-00 season, and mated again late like Martha. Had pups by 152. Mating wounds at 160 (March 3rd, 01), less than a week old. Seen in coral east of the site before 187, as I pulled the food over to it in strong winds, but she did not follow, though she came later. Always comes ~15 min after the food is placed; later on she came 10 or 5 min after. Had pups between Nov 24 and Jan 4, 02. (Overseas for 3 weeks, so missed her coming back). Mated around Feb 16th, 02, + or -2 or 3 days.

## Shark 51

nickname:

*Raintree*

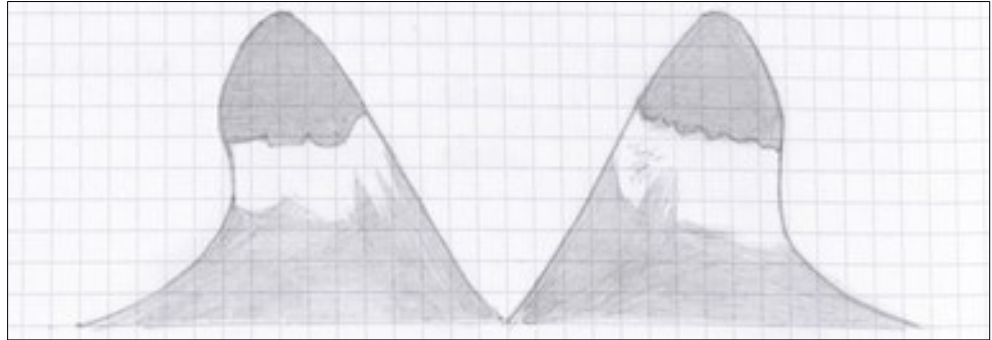

**Description:** Female; 6 feet, dark grey. Older shark.

**Sessions attended:** 42, 46, z14, 198, 207, z20, 209, 211, 233

**Comments:** Pregnant in 2001, at 198-211.

## Shark 52

Nickname:

*Jade*

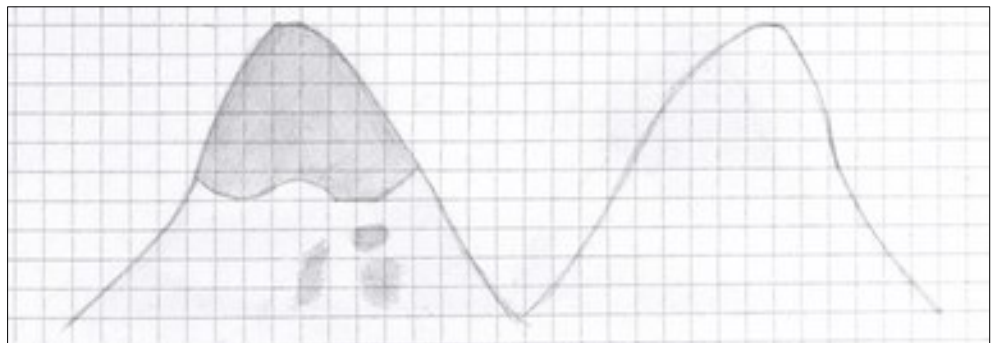

**Description:** Female, 6 feet, grey. White notch under triangle of tail on trailing edge, right pectoral fin bent up at the tip.

**Sessions attended:** 42, 44

**Comments:** Came with rare visitor Raintree the first time and never returned.

## Shark 53

nickname:

*Droplet*

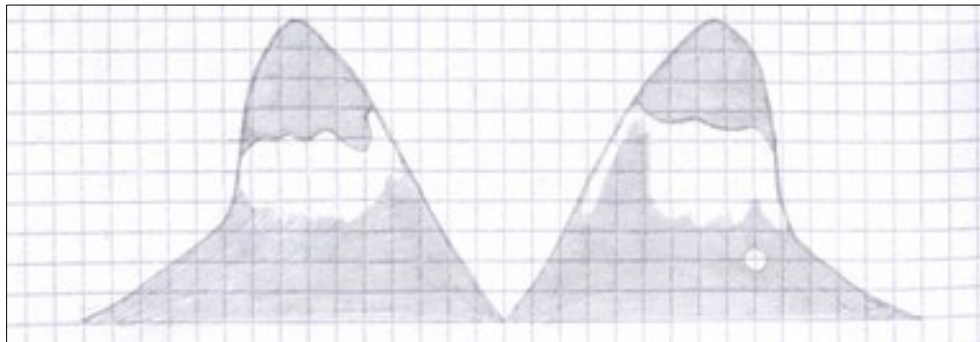

**Description:** Female, 4 feet when first identified, bronze.

**Sessions attended:** 39, 42, 50-52, 54-59, 61-64, 66, 67, 69-71, 73, 74, 76-78, 80, 81, 83, 84, 91, 104, 106-108, 111, 113, 116-118, 120-126, 128-131, 133, 138, 142, 144, 145, 165, 166, 170, 171, 175, 183, z7, 186, z9, 187, 189, z11, 194, 199, 203, z18, 204-206, 210, 211, 214, 215, 221, 223, 224, 229, 233, 246, B4-6, B8, B10, B15, 254, B16, B20, B22, B23, z32, B28, z33, B31, 260, B40, B41, 261, B43, 267-270, 274, 281

**Comments:** Gone 4 months between December 2 (145) and March 31, (165) and to 166 she came at the same time—at 6:05. She had a close association with Splash. 5:30: 199, 203: 6:15. Had pups between 206 and 210, (Oct 27 and Nov 15th, 01). Bad cut under chin at 221, flesh bulging out. Mated at 233, about Feb 16th, 02. Her range was well to the east of the site in Section A, around the B Section site.

## Shark 54

nickname:

*MarieCurie*

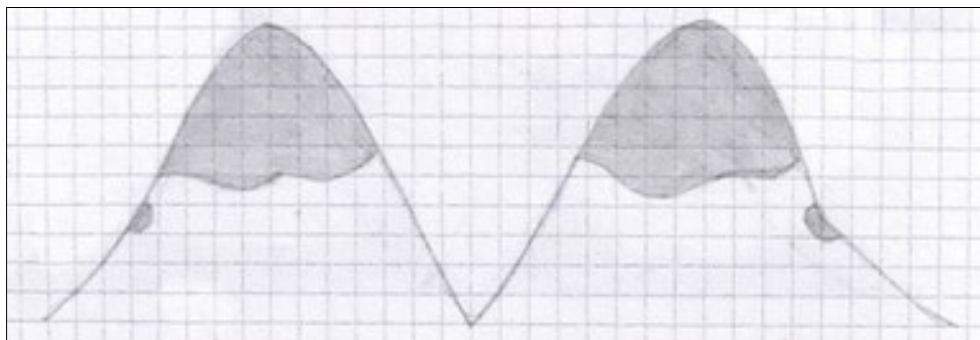

**Description:** Female; 5 feet, light brown. Right side: light dot base dorsal fin, and on tail; left side: big light circle anterior to lateral body centre, light circle two inches behind eye, black dot on side under dorsal fin.

**Sessions attended:** 43

**Comments:** Pregnant



## Shark 55

nickname:

*Bree*

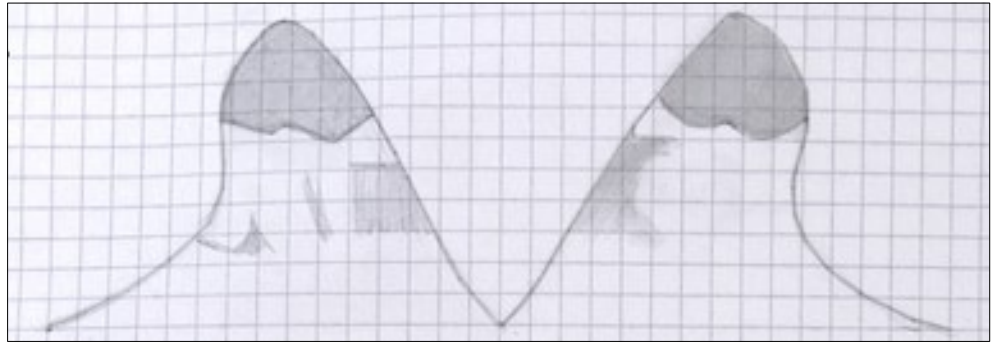

**Description:** Male, 4 feet, grey. Prominent black mark base dorsal fin, left side.

**Sessions attended:** 48, C6, C7, B18, B24, B27, z32

**Comments:** Apparent association with Merrilee—appeared in Section A with her as well as C.

## Shark 56

nickname:

*Satellite*

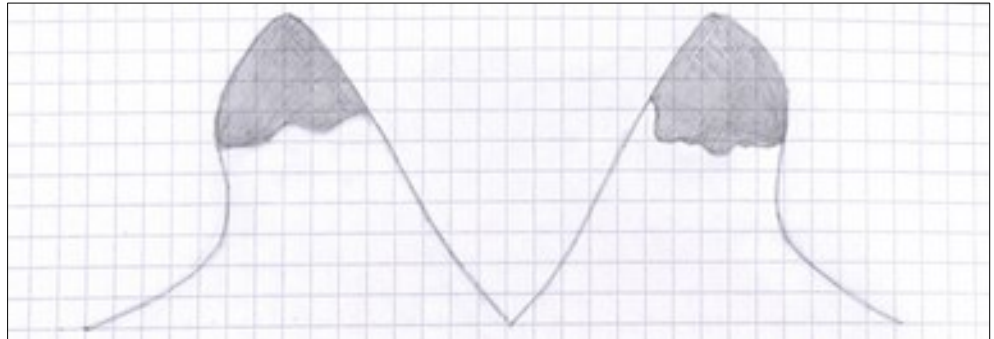

**Description:** Male; 4 feet, light grey-brown. Two black marks above right pectoral fin, others, also.

**Sessions attended:** 44, 213, 233, B19

## Shark 57

nickname:

*Ellie*

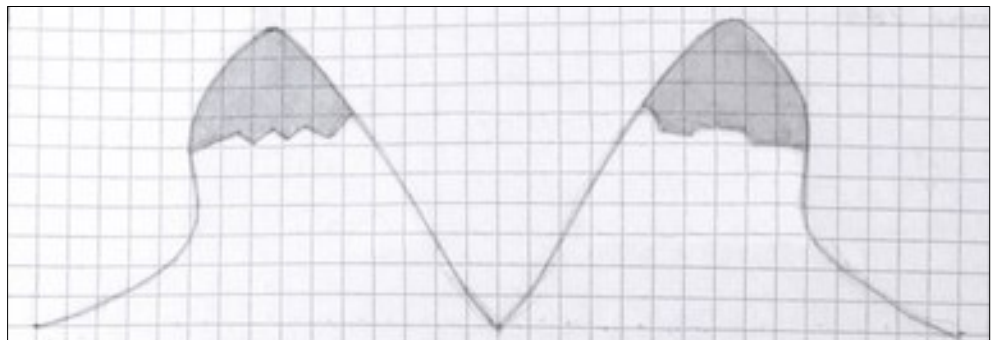

**Description:** Female; 5.5 feet.

**Sessions attended:** C4

## Shark 58

nickname:

*Samurai*

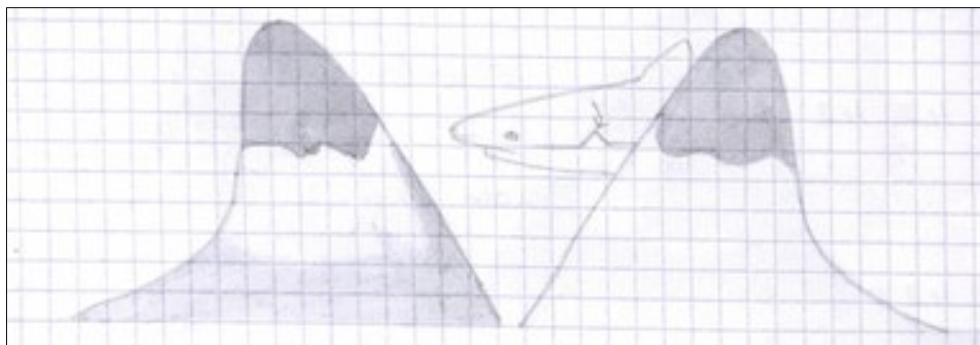

**Description:** Female; 5.5 feet, dark grey. Right side dorsal fin tip line forms inverted W; left a large bulge with tiny indent in middle. Left side, scar makes inverted 'V' about 1.5 inches high on colour line just in front of dorsal fin.

**Sessions attended:** 44, 89, 114, 160, 162, 165, 166, 167, 176, 190, z11, z14, 235, 238, 240, 245, z22, z33, 259, 261, 267, 291, 305

**Comments:** Bold and curious—circled me two feet away the first time we met, moving fast. At 114, she was mature and pregnant, the 'V' in her colour-line curved into a 'U' by (perhaps) her growth. At 291 the V was a V again, so it must change to a U as she swells in pregnancy. Again she came across as very bold, but moved more slowly.

## Shark 59

nickname:

*Storm*

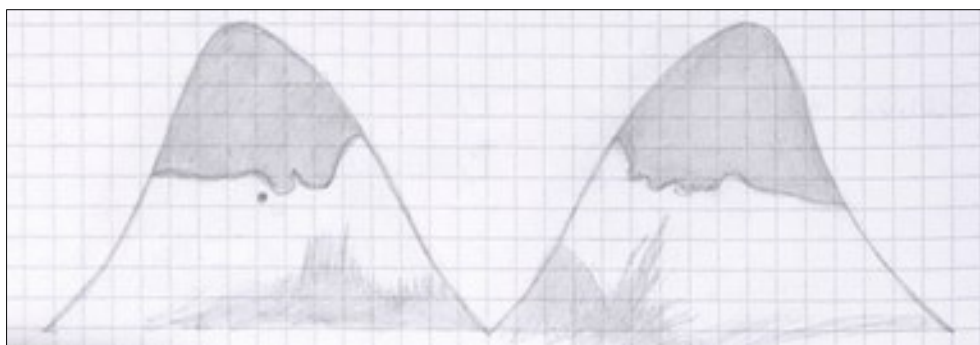

**Description:** Female; 5.5 feet, brown. Left side, a large smear on ventral surface behind lateral marking.

**Sessions attended:** 44, 51, 52, 54, 55, 57, 58, 61, 63-67, 82-84, 88, 91, 92, 94-97, 101, 105, 107, 109, 111, 113-123, 126, 128-130, 132-137, 139, 141, 143-147, 151, 153, 154, 156, 160, 164-167, 171, 174-177, y3, 180-184, y6, 185, 190, z11, 191, 192-196, y8, 198, z16, 199-206, 208, 210, 213, 215, 218, 219, 221, 225, 227, 233, 235, 238, 244, 246, B8-10, 251, B17, B23-27, z31, z32, B28, z33, z34, B33, B39, 259, 261, B45, 263, 265, 266, 269, 270, 272, z36, 279, 280, a28, 283, 285-293, z41, 295-297, z45, 298, z47, 300

**Comments:** 57: Suddenly slender so she must have had pups since I first identified her. Pregnant in 2000; very advanced at 141; had pups between December 9th and 15th. Coming in March 01 just before sunset each time (164-166). Seen in pups' coral garden in June. Main range not far to the east. Had pups by 218, Dec 04 to Dec 31, 01. Mated about Feb 9th to 16th.

## Shark 60

nickname:

*Emerald*

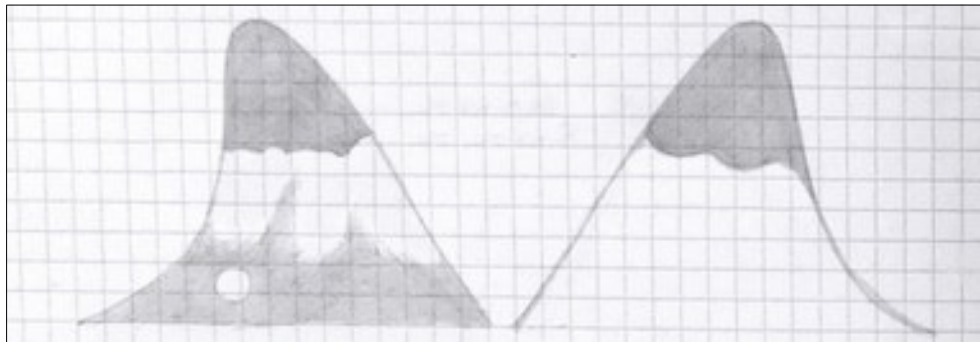

**Description:** Female; 5 feet, grey-brown. Right side, dot at lower edge of dorsal fin, and another 2 or 3 inches below it. Black dot mid body right side.

**Sessions attended:** 44, 52, 54, 72, 73, 74, 77, 114, 124, 146, 154, IB-11, Ic-18, 230, 233, 243, z33, 267

**Comments:** 73: she had mated two or three weeks before; cuts almost healed. 146: pregnant.

## Shark 61

nickname:

*Lightning*

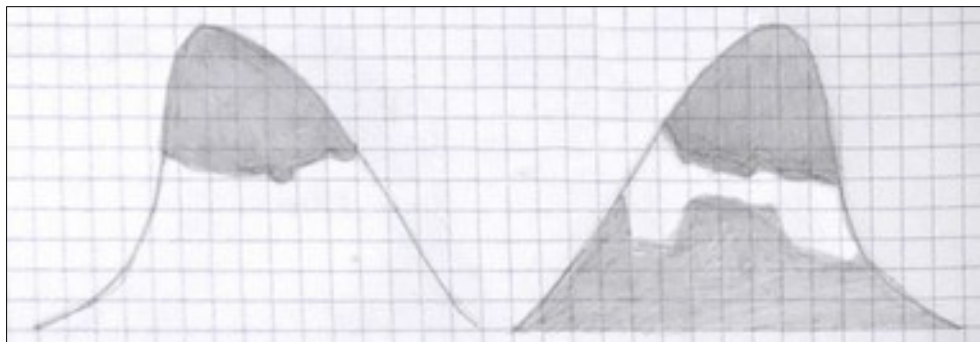

**Description:** Male; 3 feet, brown.

**Sessions attended:** 44, 46-49, 51, 52, 54-59, 61-65, 68-80, 82, 83, 87, 90, 93-96, 99, 104-109, 113-118, 120-128, 130, 132, 134-136, 138-140, 142-145, 147, 148, 151, 153-155, 157-160, 163, 164, 166-170, 173, z1, 174-180, z3, 182-185, 190, 192-196, z13, z14, 197, 198, z16, 199-220, 223, 225, 226, 228-247, B10, B13, 254, 255, a25, 256, B26, z30-32

**Comments:** 73: At 107, tiny claspers beginning to develop. At 157, 3 inches long, still small for his size. He had not grown much either. By 202, Oct 06th, 01, looking like a little adult, claspers normal for his small size.

## Shark 62

nickname:

*Arrow*

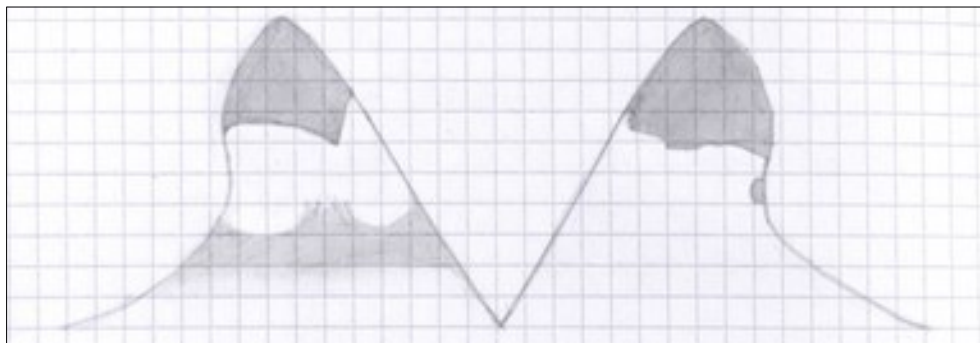

**Description:** Male juvenile; 3.5 feet, bronze.

**Sessions attended:** 39, 44, 54, 59

**Comments:** Another small juvenile of about three years of age, who stayed for a time in the area and disappeared.

### **Shark 63**

nickname:

*Dalmation*

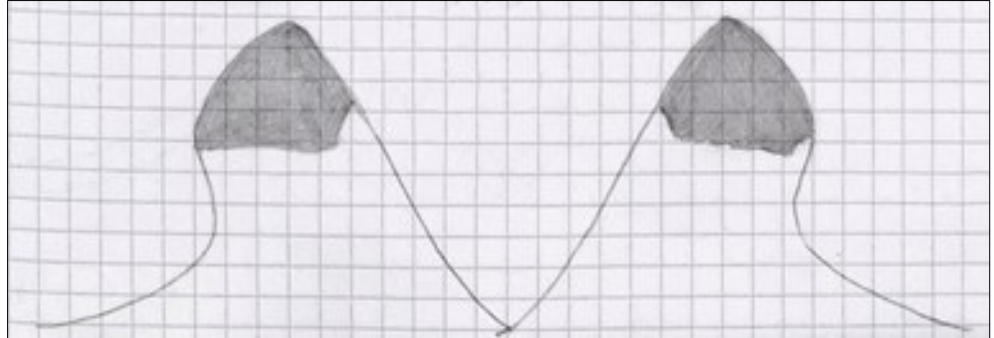

**Description:** Male; 4 feet, grey-brown. Three 1 inch white circles in a line down middle of body, left side.

**Sessions attended:** 44, 47

**Comments:** Dramatic markings ensure he was never seen again, emphasizing the complicated travels of some of them.

### **Shark 64**

nickname:

*Sarah*

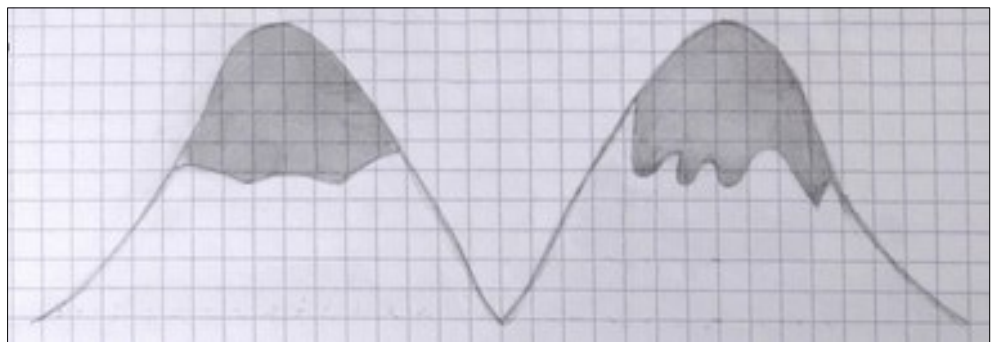

**Description:** Female; 5 feet, grey.

**Sessions attended:** 45

**Comments:** Pregnant. Appeared with Cloudburst and Marianna.

### **Shark 65**

nickname:

*Cloudburst*

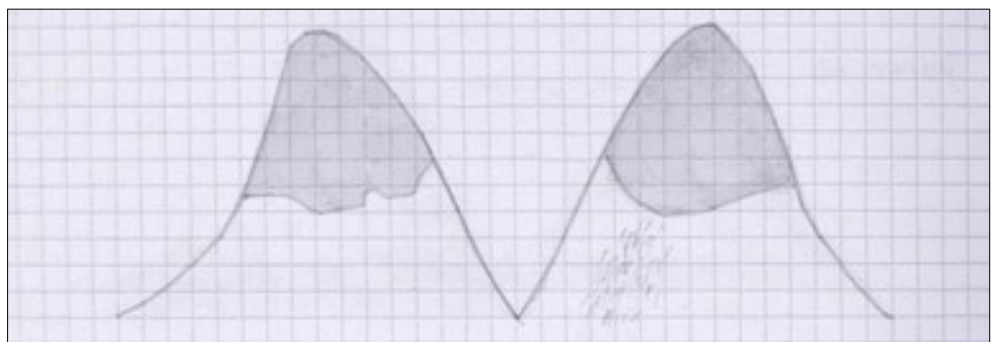

**Description:** Female; 6 feet, grey. Rain of dark spots in white band left side.

**Sessions attended:** 45, 47

**Comments:** Appeared with Sarah and Marianna. Not seen again.

## Shark 66

nickname:

*Marianna*

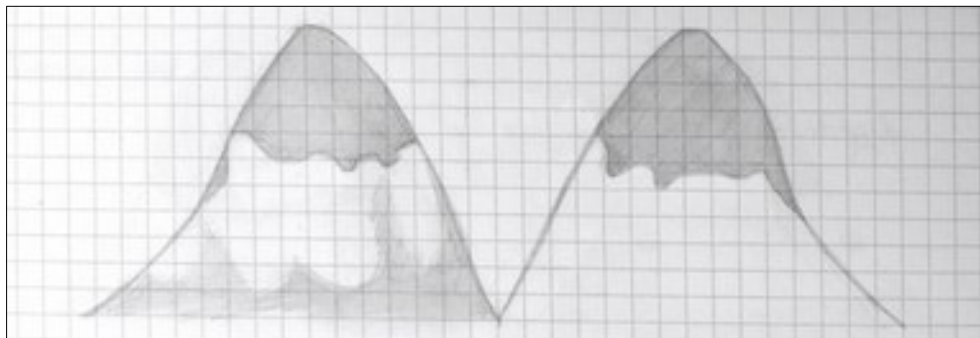

**Description:** Female; 6 feet, grey.

**Sessions attended:** 45, 46, 72, 73, 74, 76, 77, 78, 80, 82, 84.

**Comments:** First appeared with Sarah and Cloudburst, but did not move on with them. Pregnant in 1999. Mated on the 2nd or 3rd of February, 2000. Bad mating wounds at 72. Found dead, floating in Opunohu bay, on way to site at 85. Died between March 15 to 21st, 2000, likely ~19th. No visible injuries and had appeared perfectly healthy five days before. Had I not found her I would have assumed she had travelled on as so many others seemed to have done.

## Shark 67

nickname:

*Teardrop*

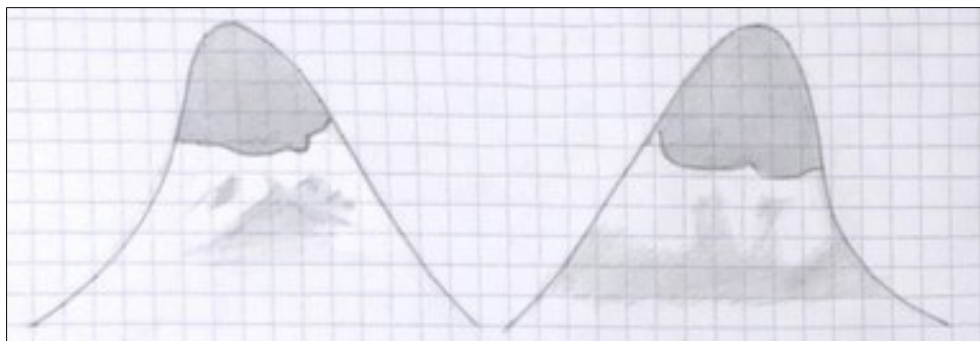

**Description:** Female; 3.5 feet, bronze when first identified. Splash-like dot; its actually 2; on left side, for which she was named, and two or three others.

**Sessions attended:** 46-49, 54-58, 60, 61, 63-65, 67-69, 71-81, 97, 100, 101, 103-108, 111, 113, 114, 118-129, 133-142, 144-146, 148-150, 154-157, 160, 162, 165-168, 170, 172-177, 179, 180, z3, 181-183, z6, 184, 185, z9, 187-190, z11, 192-203, 205, 207, 212, 213, 216, 218, 219, 225, 227, 230-238, 240-244, B5-10, B13, B15, 254, B16-B18, B21-B27, B31-33, B36, B37, B40-42, B44, B45, 265, 266, 267, 269, 272-274, 278, 281, 283, 286-291, 295, z43, 297, 298, 300, 301, 303, 304, z54, z57, z59, z60, z61

**Comments:** At 180, she had a bad bite on her gills, on the left side. At 182, black lines which were still noticeable at 185. Turned BLACK in September 2003 when the shark



finning began.

## Shark 68

nickname:

*Spooky*

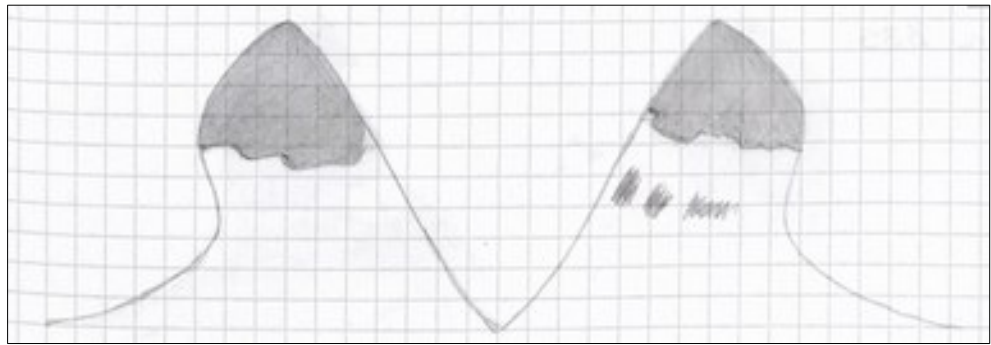

**Description:** Male; 4 feet, grey; light gold during mating season suggesting that he travels through the ocean at that time, possibly to other islands since the females are in the lagoons. White mark at base of tail on the right side, scars same place as Gwendolyn. Light dots on right side form the pattern of the 5 side of dice; left side 2 prominent light dots 3 cm apart, posterior to dorsal fin aligned at 45° angle.

**Sessions attended:** 43, 46-50, 53-66, 68, 74, 76-78, 80, 82, 84-86, 90, 91, 93, 94, 97, 100, 103-105, 108, 112, 113, 115, 116, 120-124, 127, 128, 132, 139, 146, 150, 153, 155, 156, 158, 161, 162, 164-166, 170-174, z1, 175-183, z6, 185, 188-190, z11, 192, 193, 196, 198, 201-204, 210, 211, 213, 215, 219, 225-228, 230-234, 236-247, B9, z24, 251, 254, 255, B20-24, B26, B28, B31, B32, B34-36, B38, 257, B39, 260, B40, B42, 261, B43, B45, 262, 265, 267-269, 271, z37, 283, a29, 288, z39, 290, 291, z40, z41, 296, 298, 303, z51, z52, z54, z55, z56, z57, z58. z59

**Comments:** If he comes, he's in the first wave, nearly always.

## Shark 69

nickname:

*Flannery*

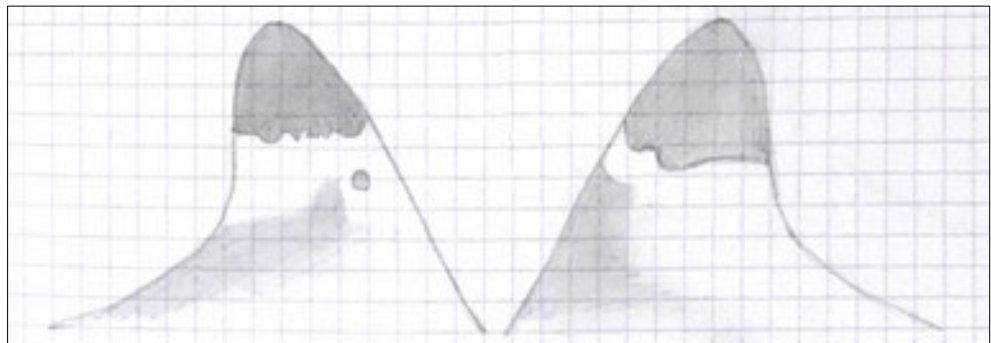

**Description:** Male; 4 feet, light grey-brown.

**Sessions attended:** 46, 127, 163-166, 181, z7, C6, C7, 217, 218, C11, B3, B6, B10, B11, B13, B17, B18, B20, B21, B22, z32, B34, z35, B37, B38, 257, B41, B43, B44

**Comments:** One of the few males living in the lagoon—ranging more towards the east. Three weeks between 217 and 218. Got sick and died exactly as Meadows did, but two years later nearly to the day.

## Shark 70

nickname:

*Dolphin*

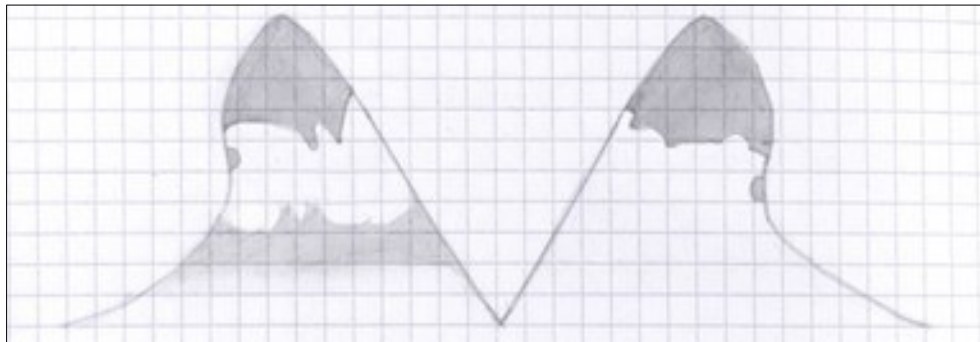

**Description:** Female; 5 feet, brown. White dot on tail above base.

**Sessions attended:** 46

## Shark 71

nickname:

*Orkney*

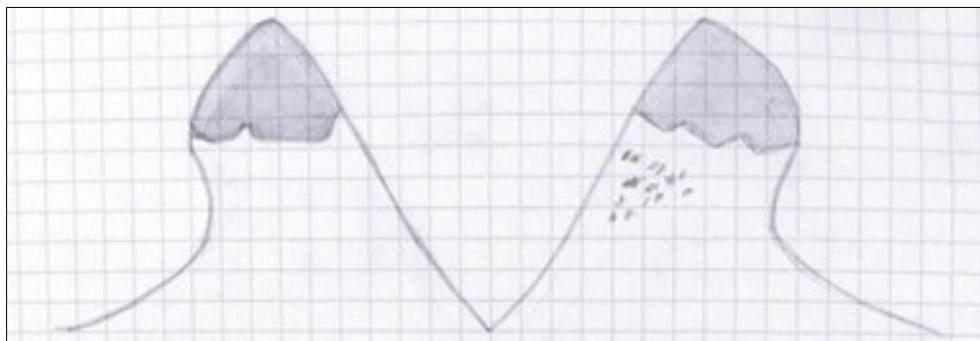

**Description:** Male juvenile; 3 feet, bronze.

**Sessions attended:** B8

## Shark 72

nickname:

*Merrilee*

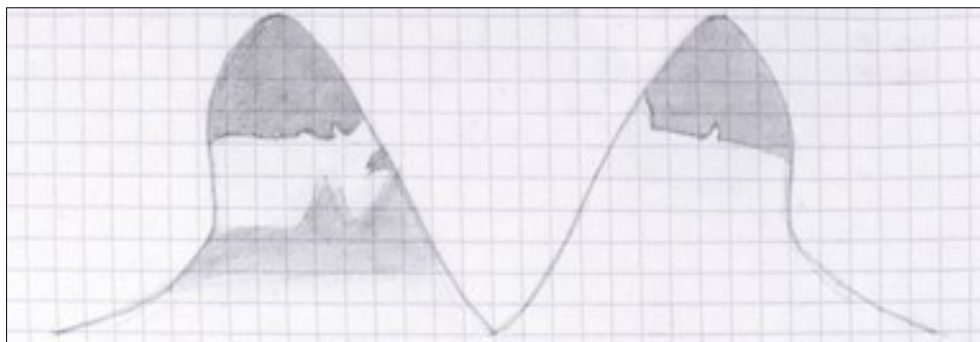

**Description:** Female; 6 feet, light grey. Black dot on back in front of dorsal fin and to the side.

**Sessions attended:** 48, 104, 111, 114, 164, C4, C5, C10, 233, 235, B4, B9, B11, B21, B43, B44

**Comments:** Pregnant: 48, C4. Probable range is between Section B and C.

## Shark 73

nickname:

*Laurel*

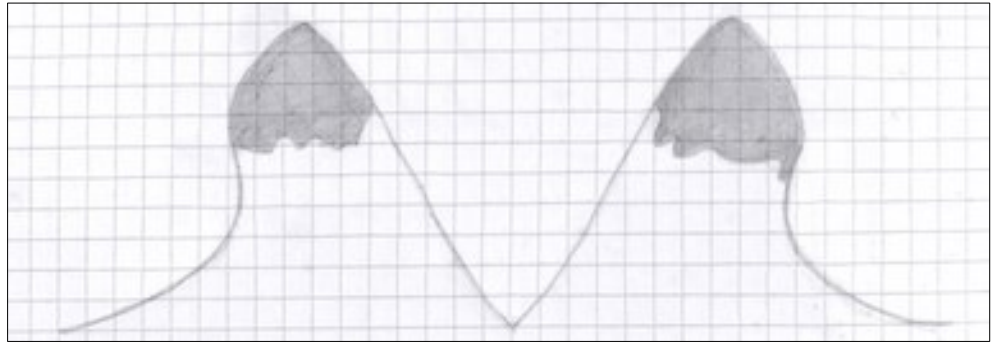

**Description:** Female; 5 feet, light brown.

**Sessions attended:** C10

## Shark 74

nickname:

*Arcadia*

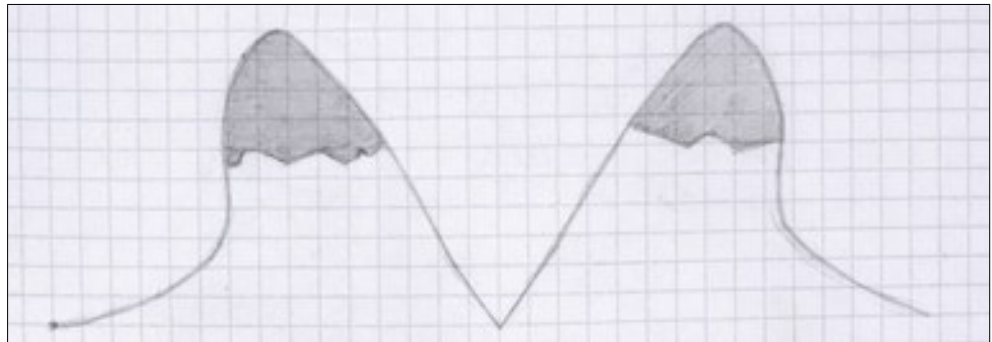

**Description:** Female; 5.5 feet, grey.

**Sessions attended:** C1, C2

## Shark 75

nickname:

*Slash*

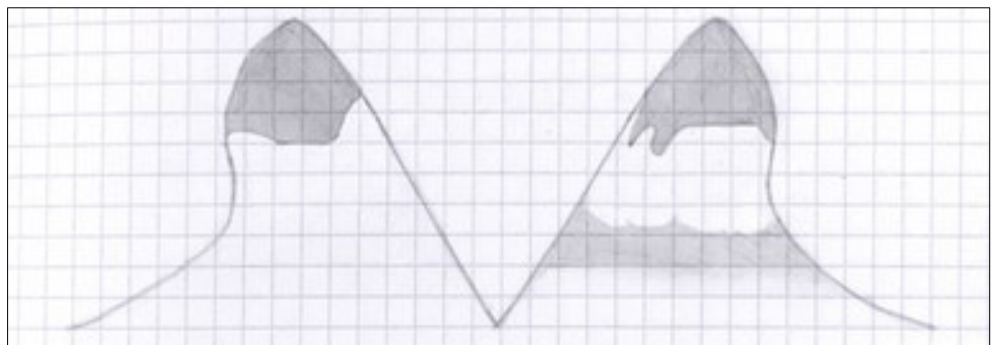

**Description:** Male; 4 feet, grey-brown.

**Sessions attended:** 48, 49, 51, 55, 62, 69

**Comments:** At 62 he had two slashes in the front of his tail near the base, one going in  $\frac{1}{2}$  inch right through the tail.

## Shark 76

nickname:

*Venus*

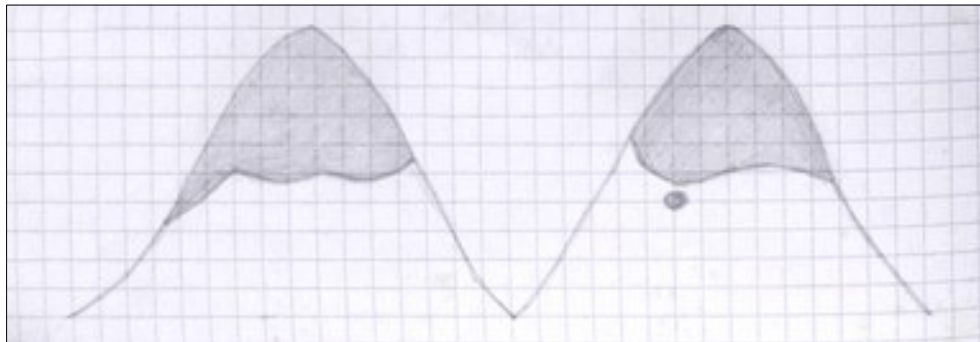

**Description:** Female; 6 feet, dark grey. Dot in white band off curved tip line like Venus above a hill.

**Sessions attended:** 49-52, 58, 61, 73, 74, 94, 104, 111, 113, 116, 118, 123, 126, 132, 138, 141, 143, 151

**Comments:** Mated probably 3rd week of January. Mostly healed at 73. Pregnant. Had pups at 151; *i.e.* between November 24th and December 31st, 2000. Ranged to the east between Sections A and B. Disappeared.

## Shark 77

nickname:

*Chimera*

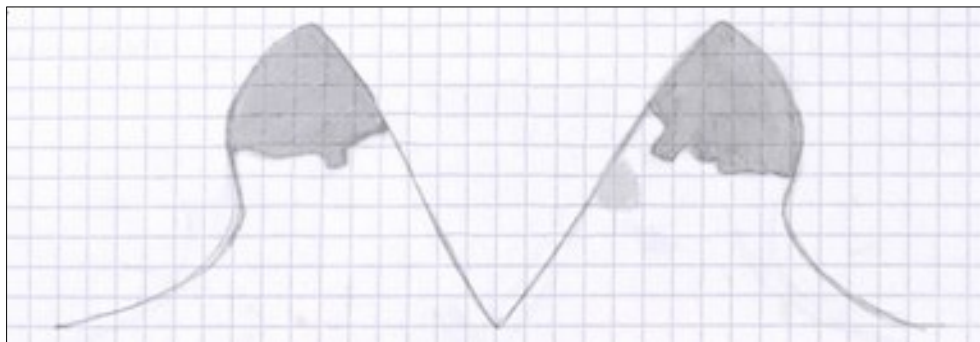

**Description:** Female; 5.5 feet, steel grey.

**Sessions attended:** 50, 57, 58, 69, 76, 90

## Shark 78

nickname:

*Meriwether*

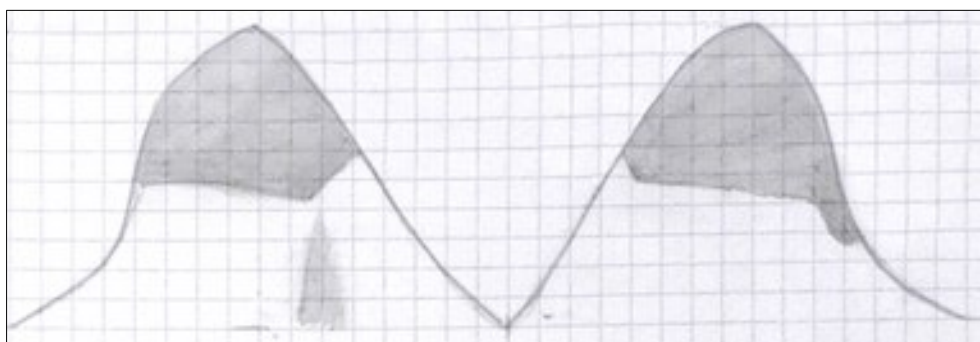

**Description:** Male; 4 feet, grey. No distinguishing marks.

**Sessions attended:** C1, 74

## Shark 79

nickname:

*Twinkle*

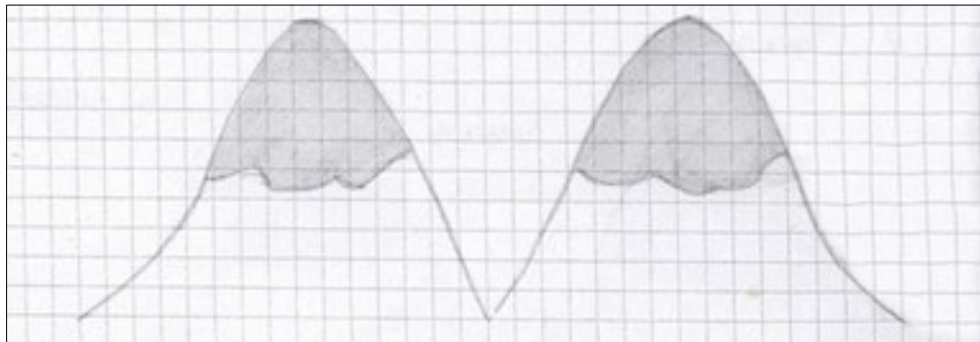

**Description:** Female; 3.5 feet, bronze.

**Sessions attended:** 50, 55, 58, 61, 68

**Comments:** When I first saw her, she had fresh mating wounds though she is a juvenile. At 55 they were healing into black marks. No pregnancy.

## Shark 80

nickname:

*Euler*

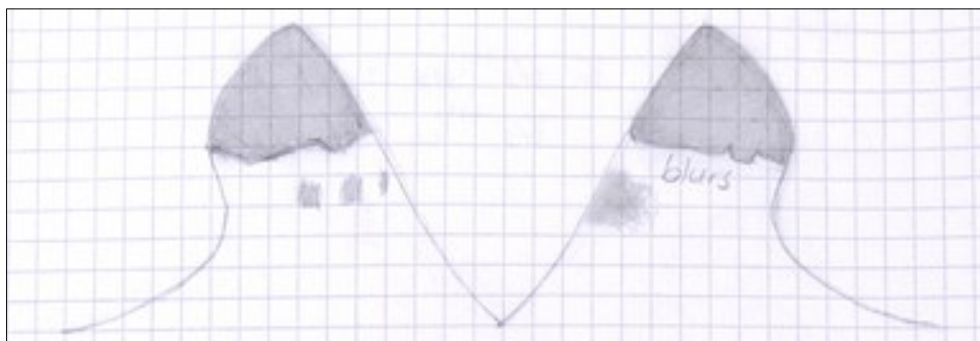

**Description:** Male; 4 feet, grey. Dot base tail, dots forming triangle between dorsal and ventral fins. Right side, large light circle mid body.

**Sessions attended:** 51, 52, 54, 56, 61, 62

## Shark 81

nickname:

*Sparkle*

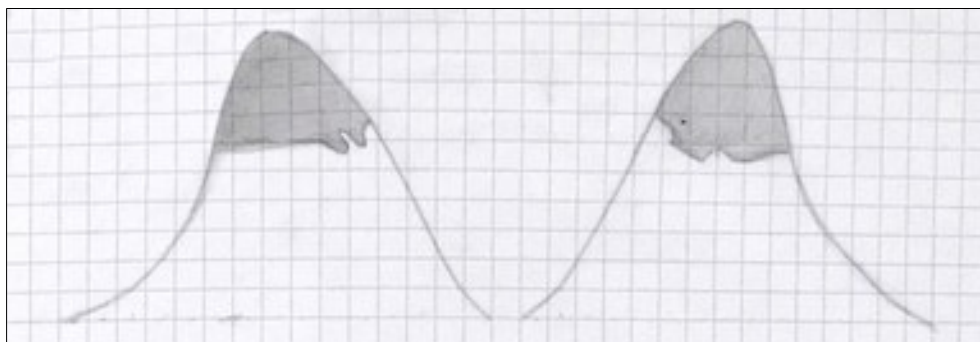

**Description:** Female; 3.5 feet, dark grey. Dot on her tail. 179 she is 4 feet, maturing. 235, nearly five feet, heavy-set.

**Sessions attended:** 48, 51, 52, 54, 55, 58, 60, 64, 68, 69, 71, 72, 76, 84, 90, 93, 94, 96, 101, 103, 104, 106-108, 110, 111, 114-120, 122, 125-130, 132, 134-137, 139, 141-144, 146, 152, 154-158, 160, 161, 163, 164, 166-170, 172-177, 179, 180, z5, 182-197, 199, 201-210, 216, 217, 219, 222, 226, 228, 233, 236-238, 240-247, a20, 251, 253, 254, B20, 256, B23-26, z30, B27, z32, B28, B29,



B31, B32, B34-38, 257, 259, B40, B41, B43-45, 264, 266, 270-272, 278-281, a28, 283, 284, a29, 285, a29, a30 286-289, z38, z39, 290, 291, z40, 292, z41, 295-298, 300-303, z53, z54, z55, z57, z58, z59, z60, z61

**Comments:** Mating wounds at 68; mated by January 21, 2000—very small to mate; did not get pregnant. In June 01 becoming a big shark, filling out a lot. Distinguished herself as smart shark. Cut on back right side 207, in last two days, (Nov 1<sup>st</sup>). Mated Dec 11 to Jan 4, 02. Hooked September 03, took 8 months to lose it; trailing 2 metre line covered with algae, making it hard for her to advance; she jerked her head with every beat.

## Shark 82

nickname:

*Pippet*

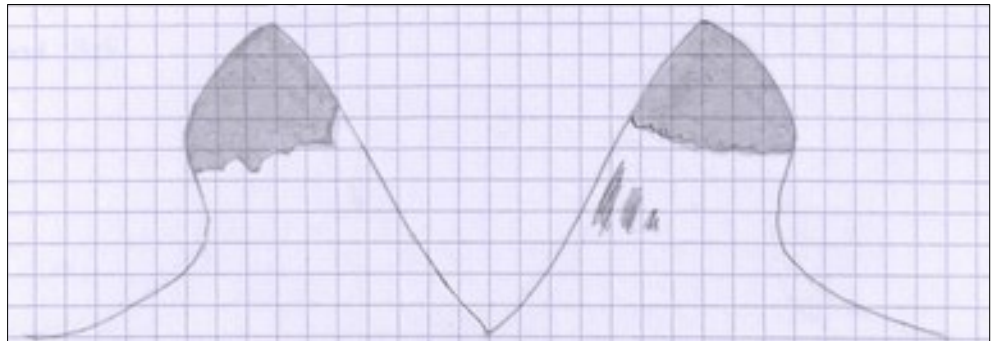

**Description:** Female juvenile; 3.5 feet, grey.

**Sessions attended:** 51, 56, 134, 135, 142, 145-148, 150, 152-156, 162, 167, 169, 172-174, 176, 178-181, z4, 183-188, 190, 193-196, 198, 199, 201, 202, y11, 203, 204, 206, 207, 209-219, 221-225, 230, 231, 233, z21, 237, 239, 240, 242-244, 246, 247, a18-20, 254, B20, B21, 256, z20-31

**Comments:** Acting strange at 211—twisting, flicking, changing direction, no apparent reason. Disappeared.

## Shark 83

nickname:

*Splash*

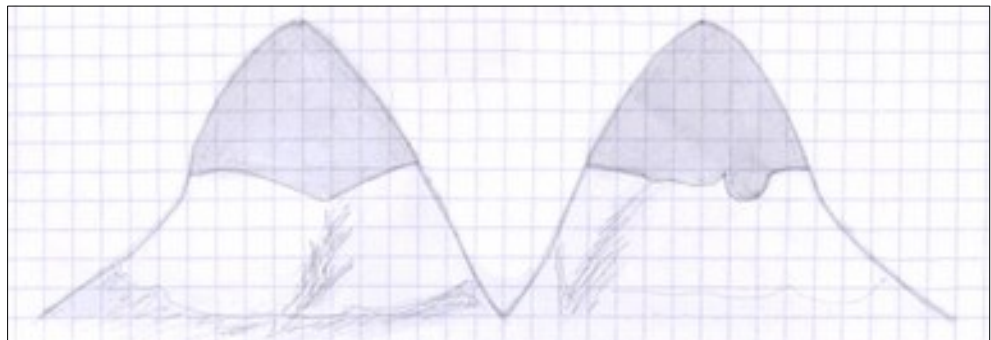

**Description:** Female; 4 feet, grey; at 104, light brown or gold.

**Sessions attended:** 51, 52, 61, 66, 67, 69, 70, 72, 75, 76, 78, 80, 94, 104-108, 110, 111, 114, 116-120, 123, 130, 132, 133, 137, 138, 140, 141, 146, 150

**Comments:** Energetic shark, acrobatically sailing around the site and vicinity when present. Companion of Droplet, from other side of barrens. While Droplet would come to the site at Section A without her, she scarcely ever came without Droplet. Disappeared; presumed dead.

## Shark 84

nickname:

*Robin*

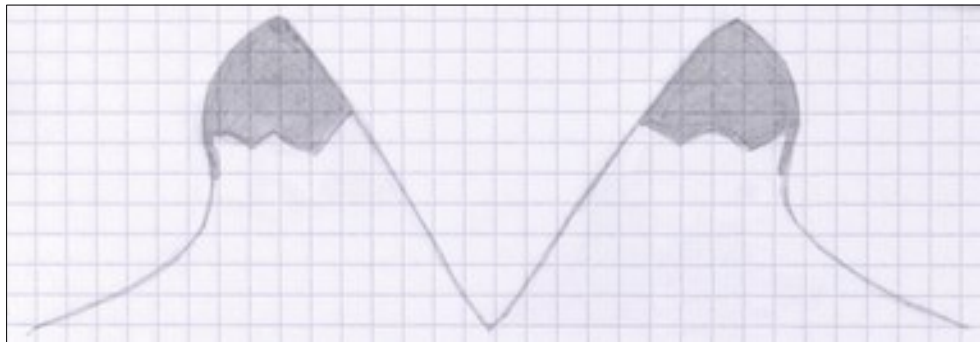

**Description:** Male; 4 feet. Large light circle on mid-line right side, posterior to dorsal fin, and many dots on left. Black dot on left side just below and in front of dorsal fin.

**Sessions attended:** 51, 52, 61, 156, 164, 204, 206, 229, 230

## Shark 85

nickname:

*Tornado*

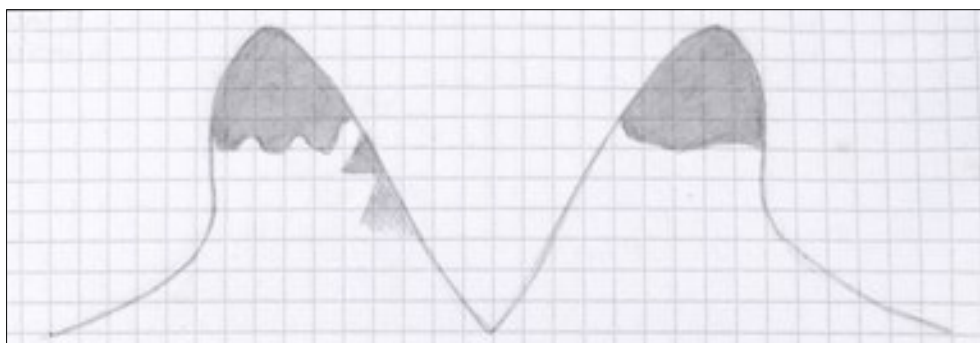

**Description:** Female; 6 feet, grey.

**Sessions attended:** 1, 2, B4, Aa19, Ba3, B19

**Comments:** Often seen in daytime in Section B.

## Shark 86

nickname:

*Filoh*

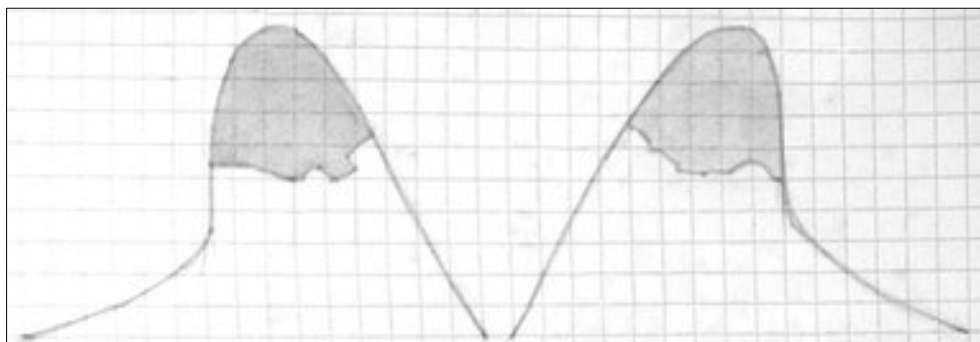

**Description:** Female; 4 feet, dark brown. Many light marks; right side a vertical line of 3.

**Sessions attended:** 52, 61, 62, 74, 75, 80, 82, 84, 87, 90, 91, 96, 97, 100, 101, 103-109, 113, 114, 116, 118-124, 126-139, 141, 143, 144, 146-148, 150, 155, 156, 158, 160, 162-166, 168-175, 177, y2, y3, 180, z3, 182, 184-186, z9, 187-192, 194-195, z13, 196, 197, 204, 207, 211

**Comments:** Sw of site at 9:00 a.m. 03/09/01; at site at noon Sept 16, 2001. Sw of site at 9:00 a.m. 03/09/01; at site at noon Sept 16, 2001. Last seen November 16th, 2001, after absence of about three weeks, irregular prior to that, too. Disappeared.

## Shark 87

nickname:

*Barracuda*

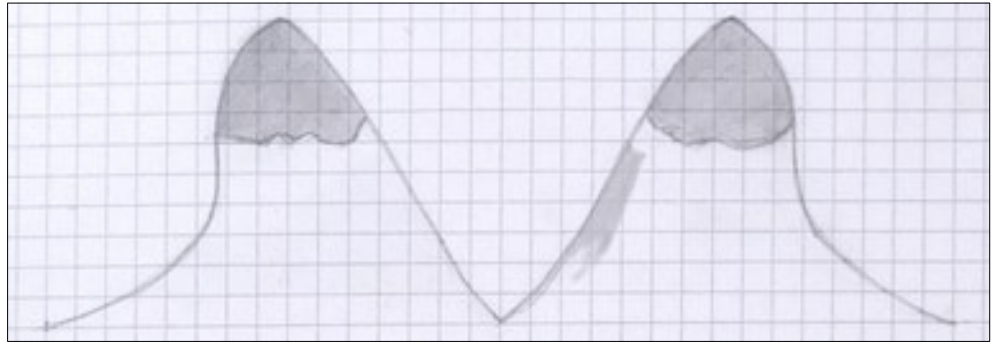

**Description:** Female; 5.5 feet, grey.

**Sessions attended:** C2, C5, Aa19, B6, B7, B13, B16, B17

## Shark 88

nickname:

*Trill*

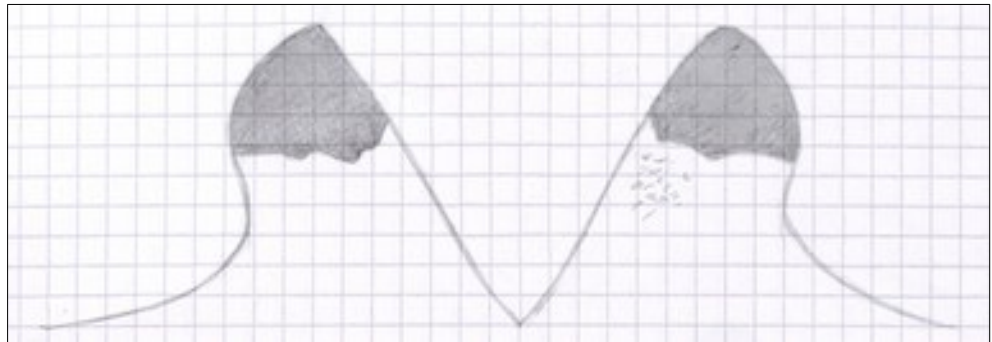

**Description:** Juvenile; 2 feet, bronze.

**Sessions attended:** B Section sessions: 3-10, 16-19, 21, 22, 23, 25, 27-29, 32, 33, 35-38, A259, 42, 43, 44

**Comments:** One of the many pups refuging in thick coral beyond the Section B observation site.

## Shark 89

nickname:

*Braddy*

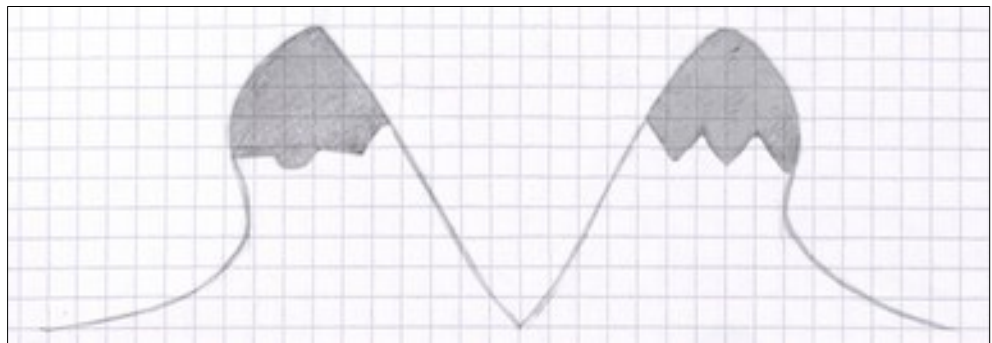

**Description:** Male; 3.5 feet, grey.

**Sessions attended:** 54, 69, 142, 154

**Comments:** Seen on the outside of the barrier reef.

## Shark 90

nickname:

*Impy*

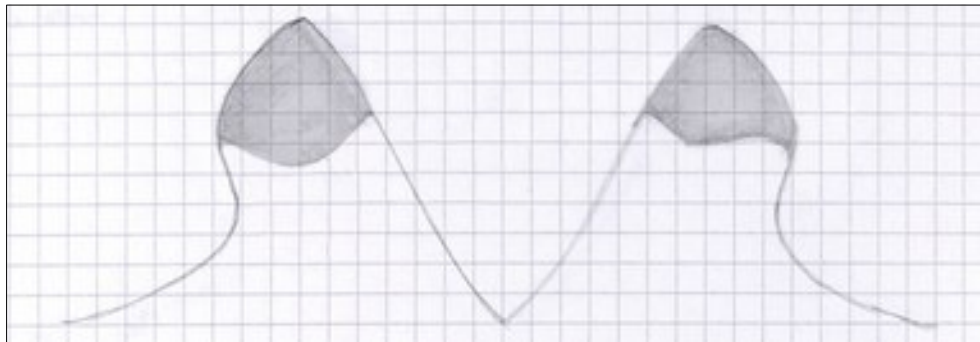

**Description:** Juvenile; 2 feet, bronze.

**Sessions attended:** 54, 56-59, 61, 63, 64

## Shark 91

nickname:

*Shadow*

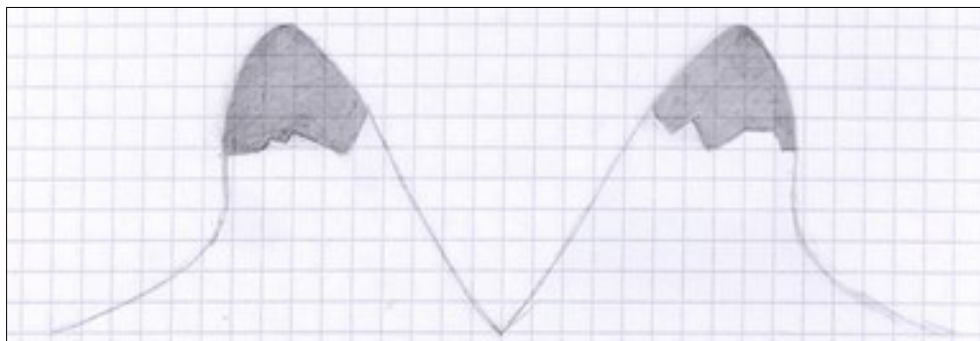

**Description:** Female; 6 feet, grey.

**Sessions attended:** C

## Shark 92

nickname:

*Vixen*

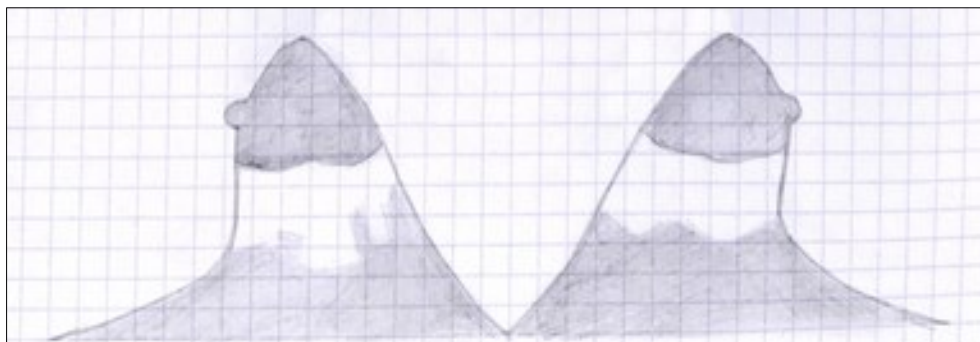

**Description:** Female; 4 feet, rust coloured at first sightings; turned dark grey then brown, then pale ochre, by Nov, 01. 2 bright marks aligned vertically mid right side, 3 inches apart, with a smaller, fainter one an inch above and posterior to the upper one.

**Sessions attended:** 74, 83, 84, 155, 164, 166, C2, 198, 203, 210, 233, 267, 269, 281, 282, 286, 287, 295, 298, 300

**Comments:** Often appeared with Grace; first time with Meriwether, who was also seen in Section C. Super pregnant at 198, like a balloon. Very grey. Had had pups at 203, between Sept 12 to Oct 11th. At 210 she is pale ochre. She became a very big shark.

## Shark 93

nickname:

*Petrel*

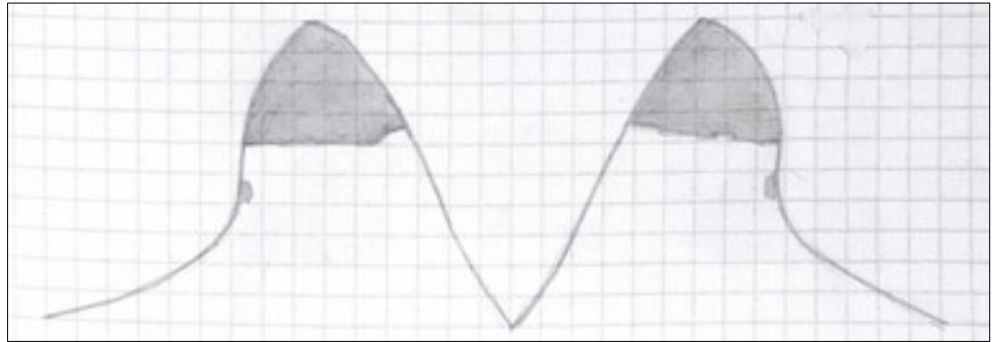

**Description:** Male; 3.5 feet, light grey. Tail tip edge shredded. Black dot trailing edge of white band. Group dots right side of head. Tip unusual with flat lines both sides.

**Sessions attended:** 55, 57, 58, 62, 64, 66-70, 72, 73, 77

## Shark 94

nickname:

*Trinity*

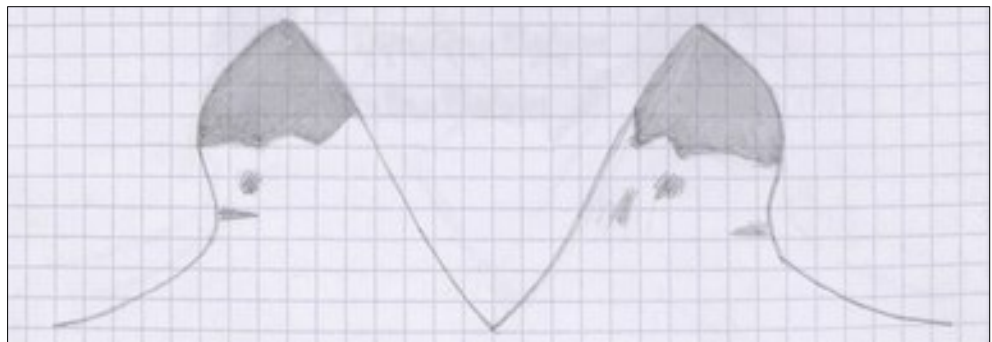

**Description:** Female; 3.5 feet. White shadings on sides.

**Sessions attended:** B8

## Shark 95

nickname:

*Willow*

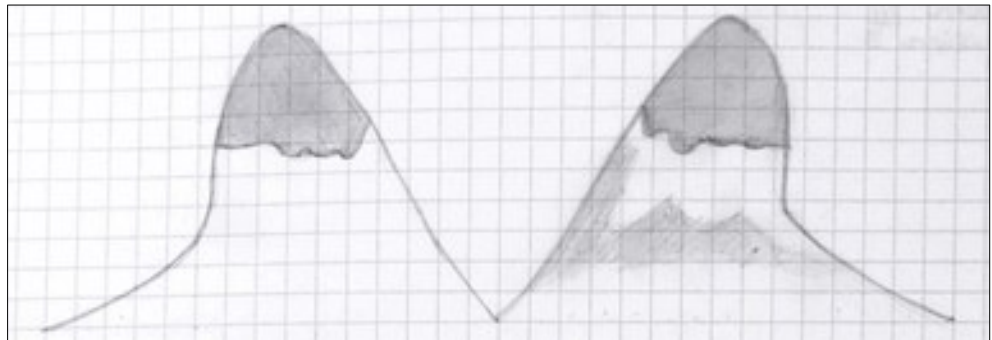

**Description:** Female; 5.5 feet, grey.

**Sessions attended:** C2, C7, E2

**Comments:** Roamed the eastern half of the lagoon, never seen in Section A.



## Shark 96

nickname:

*Mungojerry*

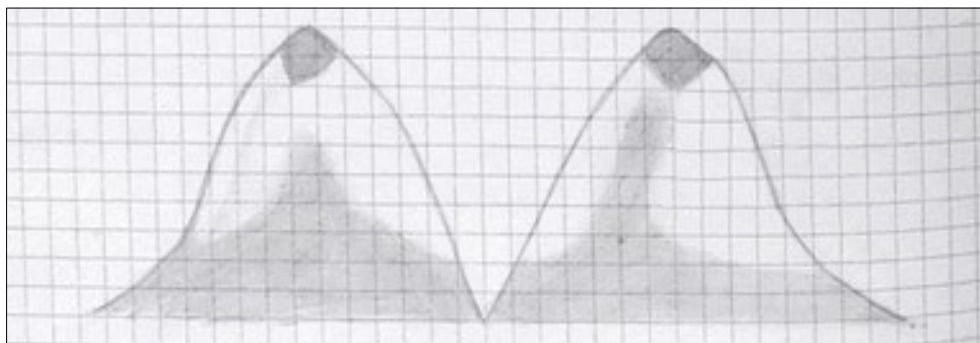

**Description:** Male; 4 feet, brown.

**Sessions attended:** 57, 61, 62, 64-70, 75, 77-79, 81, 83, 84, 87, 88, 90, 93, 104, 105, 107-109, 113, 116, 118, 119, 121-132, 136, 140, 141, 144, 145, 152, 154, 155, 157, 159, 160, 165, 167, 176, 178, B1, C1, B2, 180, z5, 184-186, 190, z11, 191, 192, 194, 198-200, 202, 210, 211, 213, 214, 219, 222, 225, 229, 233, 235, 236, 238-241, 244-246, B3-B11, 254, B17-25, B31-34, B36, B37, B39-45, 266, 267, 270-272, 274, 279, 281, 285, 287-289, 291, z40, 296, 297, 298, 302, 303, z55, z57, z60

**Comments:** 2nd time he came, I snapped a photo as he passed, and he came closer as a result, an unusual reaction. Roams in the lagoon during the day, usually closer to the middle of the lagoon. Comes to sessions in Sections A, B, and C, once all in one morning. In mating season 00/01, his colours hardened and darkened. At B2, he appeared faster than he's ever come—in 2 minutes. There waiting for me at 180. Came at sunset 184-190.

## Shark 97

nickname:

*Rumcake*

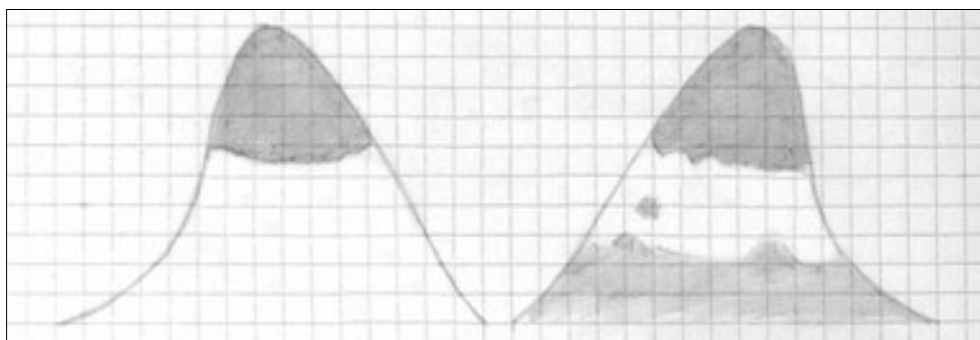

**Description:** Female juvenile; 3.5 feet. Group of light dots, with 2 close together, right side, and one at base of dorsal fin. Light spot middle of back of head. Two light dots close together on the left side of the base of her dorsal fin. Large light dot on her back near her tail.

**Sessions attended:** 58, 60, 61, 65-80, 83, 85-87, 90, 91, 94, 100, 104, 111-124, 126-130, 132, 136, 138-146, 150-159, 161, 162, 164, 166-168, 170-174, 176-188, 195-199, 201, 204, 207, 215, 216, 218, 219, 223, 225, 229-245, 247, B7, B9, B10

## Shark 98

nickname:

*Galen*

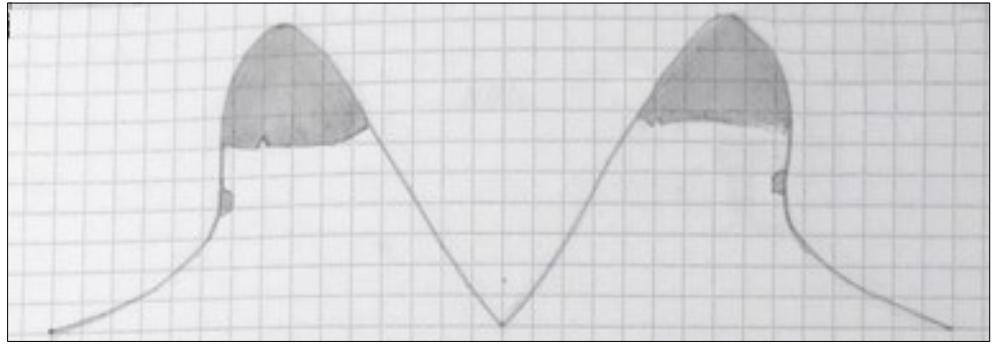

**Description:** Male; 4 feet, pale grey. No distinguishing marks.

**Sessions attended:** 58, 60, 70, 72, 78

## Shark 99

nickname:

*Stormy*

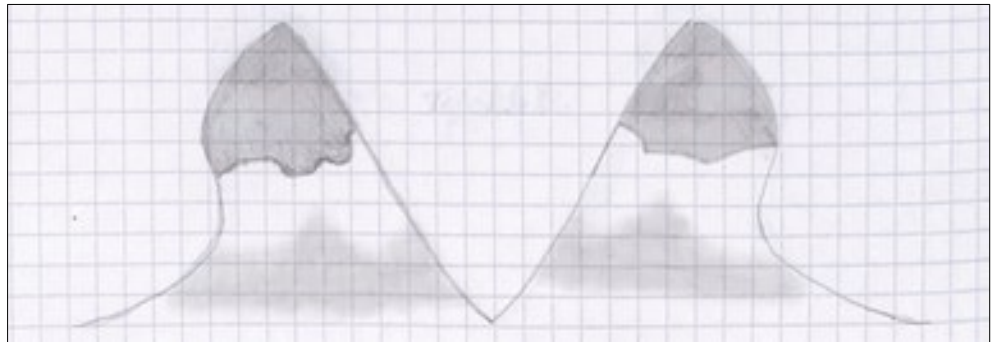

**Description:** Female; 3.5 feet.

**Sessions attended:** 58, 171

## Shark 100

nickname:

*Hawking*

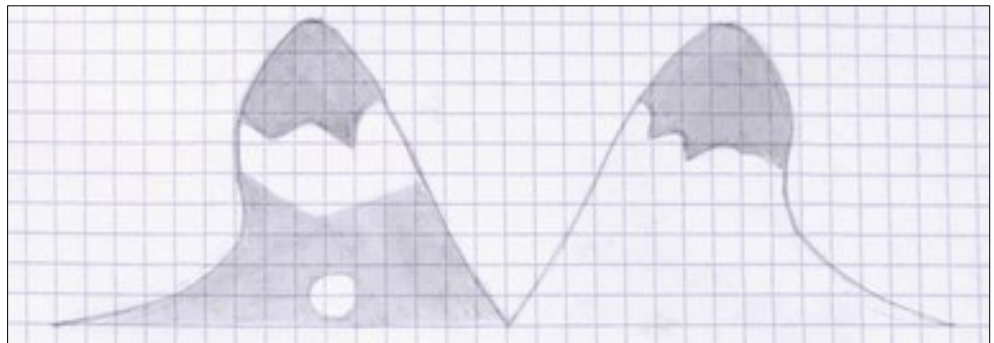

**Description:** Male; 4 feet, grey-brown. Light mark right side base of dorsal fin

**Sessions attended:** C4; C6

**Comments:** Came with Penrose, and they look a lot alike; may be brothers. He and Cochise were also in Section A during the same period, though they both tend to range the mid-lagoon, and were seen together at the C site.

## Shark 101

nickname:

*Foxglove*

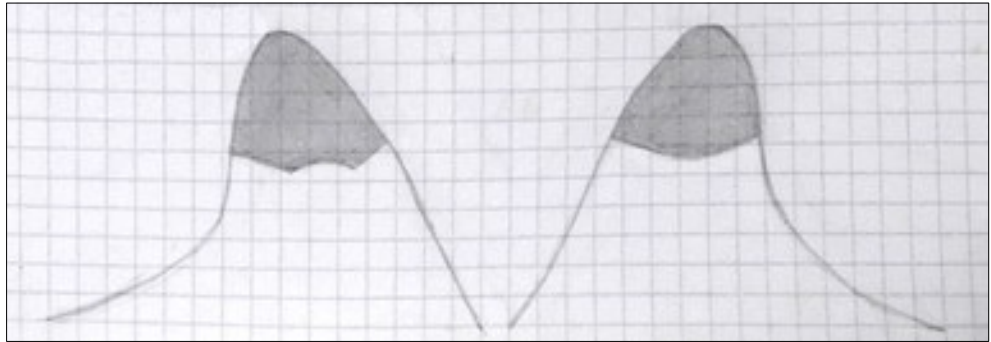

**Description:** Juvenile female; 3.5 feet. Light mark at right side of base of dorsal fin

**Sessions attended:** 56-58, 61, 66-69

## Shark 102

nickname:

*Penrose*

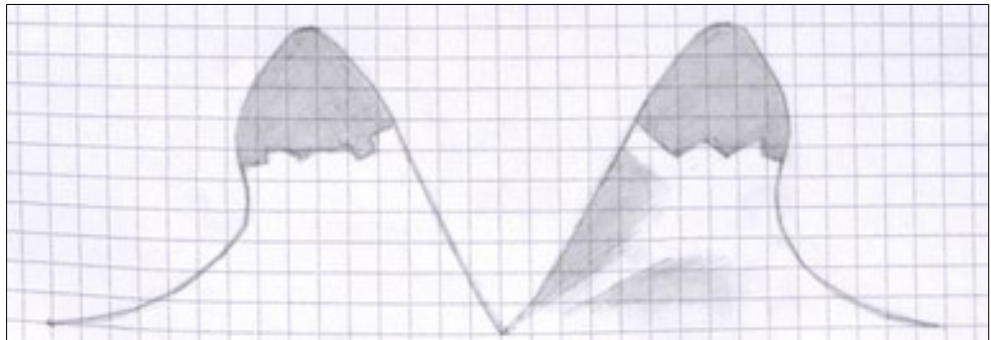

**Description:** Male; 4 feet, grey-brown. Large dark blotch 3" across just posterior to dorsal fin right side.

**Sessions attended:** C4, 141

## Shark 103

nickname:

*Mephistopheles*

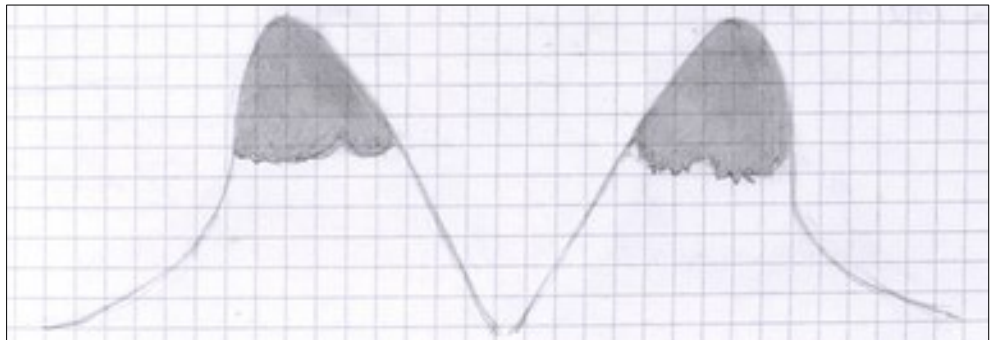

**Description:** Male; 4 feet, brown; grey at 138. Bite out of nose, healed. Thickness of cut place: >1 inch. Two angled, mostly vertical white scars like healed knife slashes, on right side posterior to dorsal fin.

**Sessions attended:** 60, 65, 138, 141, 145, 210, 215, 218, B28, 274, z48

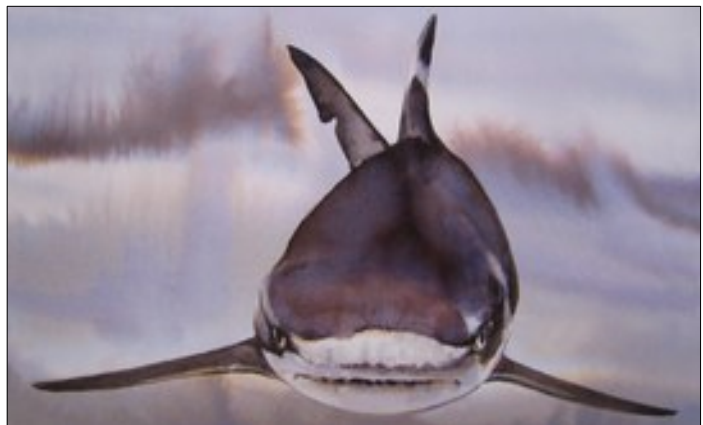

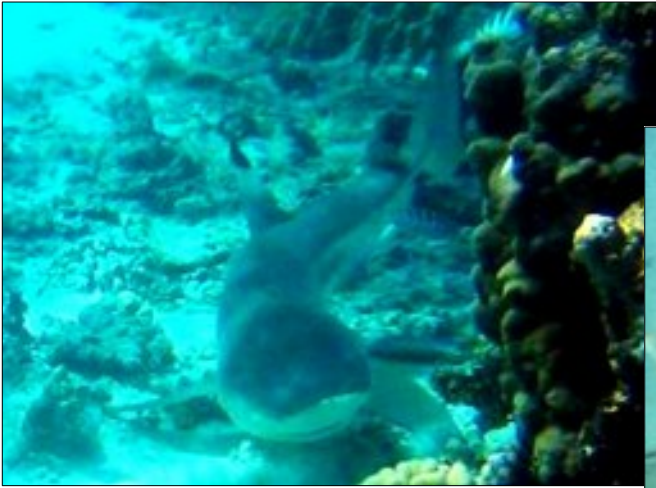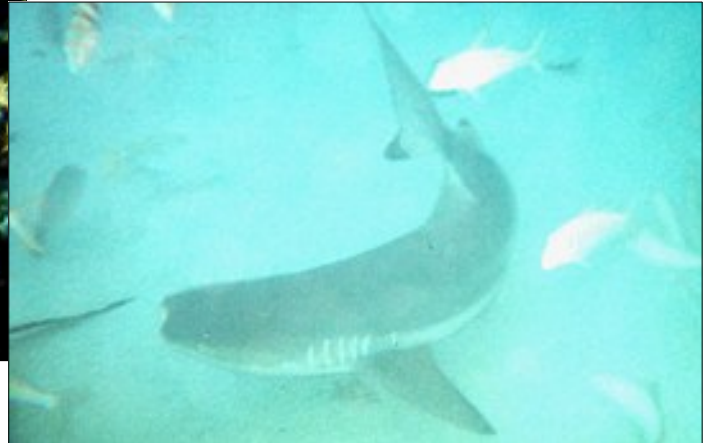

**Comments:** Bold and fast moving. Seen December 15, 99 and January 2, 00, next year November 3rd, 17th, December 2nd, 2000, then November 15th, 2001, December 02, December 03. Present at both sessions Shenandoah came. In spite of his unforgettable appearance, the dive club owners taking people daily to shark dives on the outer reef have never seen him! Suspect he visited during the mating season from another island.

## Shark 104

nickname:

*Cochita*

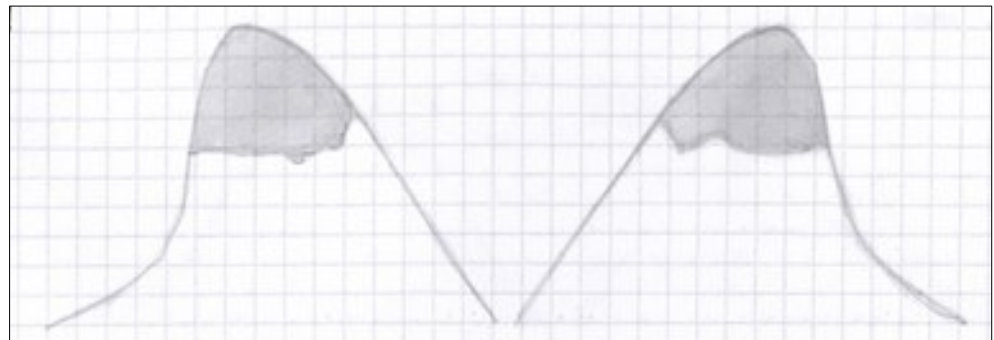

**Description:** Female; 3.5 feet, the colour of dark chocolate identified. Dot on back of head, right side, and one on body. Left side: dot on tail, another on her side.

**Sessions attended:** 39, 60, 61, 63, 65, 69, 70, 72, 75, 76, 78, 79, 81, 83, 84, 86, 91, 94, 96, 99, 102, 104, 106, 107-109, 111-114, 116, 118, 122, 124, 126-129, 131-139, 141, 143-148, 150-158, 160-181, z4, 182, z6, 184, 186-190, 193-196, z15, 197-201, 203-213, 215, 217, y-14, 218-238, 240, 242-247, O2, O3, a19, 252-255, a26, z32, 258-261, 263, 265, 266, 268-275, 277, 279, 280, 282-284, a29, 285, a30, 287-291, z40, 292

**Comments:** Very similar in appearance to Cochito; even to the dorsal fin pattern. The pair arrived in the area at the same time and usually appeared together, often side by side. As they matured, they moved more with partners of the same gender. Quickly they were among those present when I went underwater, apparently understanding the sound of my approaching kayak. Missed 2 sessions when I approached from the eastern direction, yet met me underwater swimming southwest of site 03/09/01 9:00 a.m. Her range became the border area.



## Shark 105

nickname:

*Cochito*

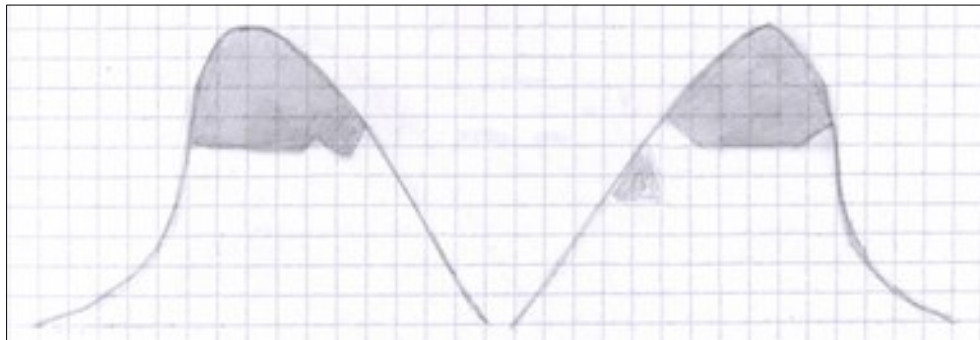

**Description:** Male; 3.5 feet, brown when identified just before maturity.

**Sessions attended:** 58, 60, 61, 64, 65, 67-70, 72, 73, 77, 80-82, 84-91, 93, 95-97, 99, 101, 103-105, 107-114, 119-121, 123-128, 132-138, 140, 144, 151, 153-158, 161-172, 174-186, 189, z11, 192, 193-202, 204, 206, 208-213, 218, 219, 220

**Comments:** Very similar in appearance to Cochita; even to the dorsal fin pattern. The pair arrived in the area at the same time and usually appeared together, at times in parallel. As they matured, they moved more with partners of the same gender. At 155, slash from mid base dorsal fin 4" down to mid body. Already black; he didn't have it 7 days before at 154, showing healing rate. At 167, another slash 3" behind the first one, gaping wide. Slash on tail tip at 174. He had a slash in 2000 also. Very strange that this maturing juvenile male would receive slashes in the same place year after year.

## Shark 106

nickname:

*Cochito's companion*

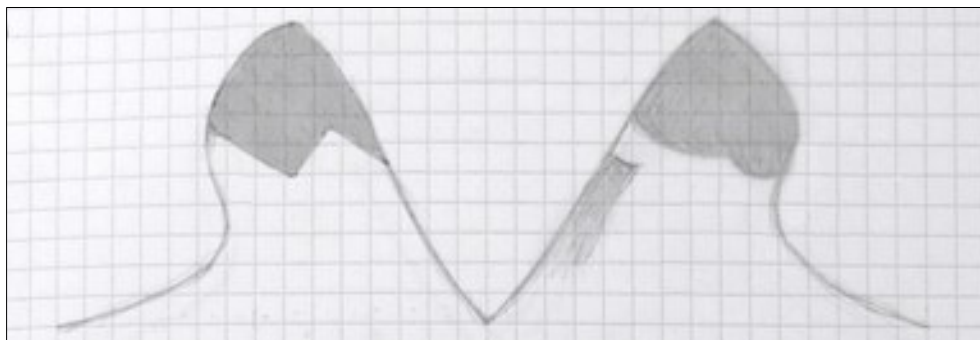

**Description:** Male; 3.5 feet. A few light dots, two close together in front of dorsal fin about 1 cm across. Came with Cochito at 65.

**Sessions attended:** 62, 65, 84

## Shark 107

nickname:

*Sophie*

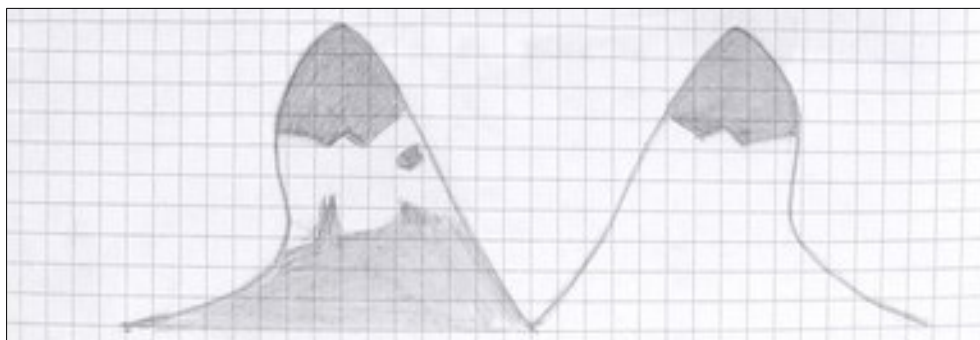



**Description:** Female; 6 feet grey.

**Sessions attended:** C5

### **Shark 108**

nickname:

*Cromarty*

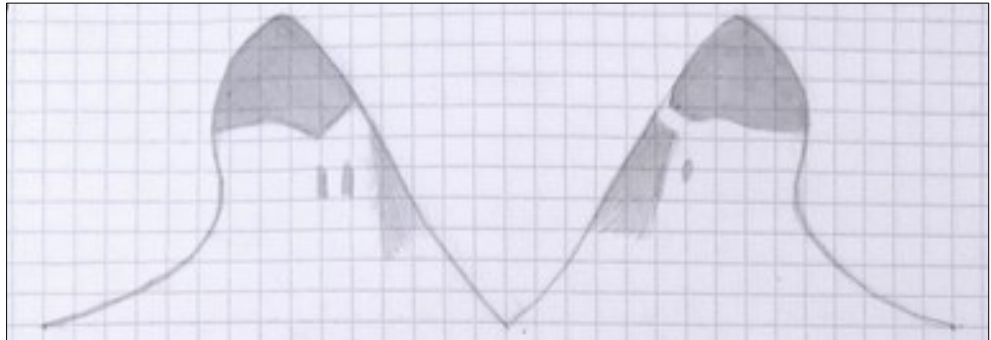

**Description:** Male; 4 feet.

**Sessions attended:** C5, C8

### **Shark 109**

nickname:

*Carrellina*

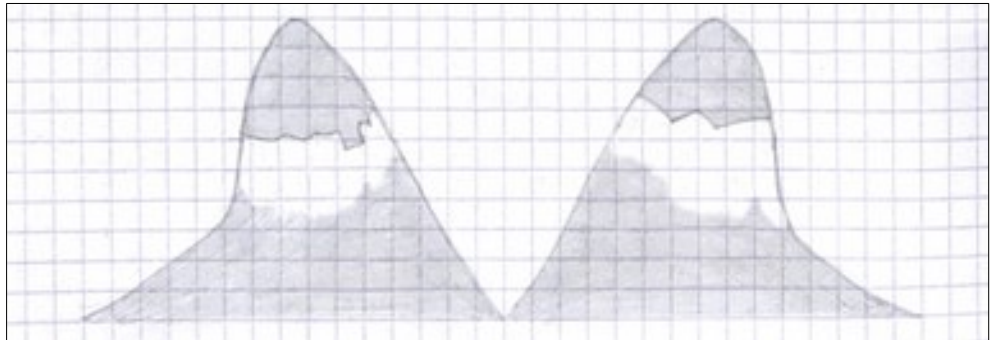

**Description:** Female; 3.5 feet, bronze. Lower tail lobe shredded at first; healed perfectly.

**Sessions attended:** 64, 66-81, 84-87, 89, 91-94, 96, 124, 129, 130, 133, 134, 136, 138-140, 142, 143, 145, 146, 149, 150, 152-154, 156-159, 161-167, 216, 221, 223-233, 236-238, 240, 241, 243-246, z31, z34, B32-34, B43, 266, 273-278, 280, 281, 283, 289

**Comments:** Appeared about the age of 3 years, scouting the site after dark when the others had gone before coming at the beginning. Bite marks November 24th, 00. At 216, bite out of left pectoral fin, and prominent black dot about where Merrilee's is. Stayed 8 months, absent 8 months, returned in December 02. Left in April, returned in December, 03. Mated at 221, 1 to 2 weeks before (Dec 26 to Jan 2nd approx, 2002). Disappeared in March, 04, presumably finned. Enthusiastic individual, even after maturity.

## Shark 110

nickname:

*Coldwater*

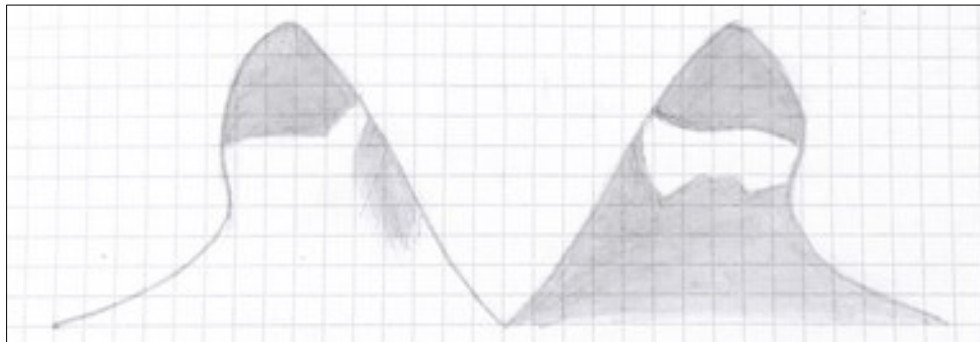

**Description:** Female; 6 feet.

**Sessions attended:** C5

## Shark 111

nickname:

*Shimmy*

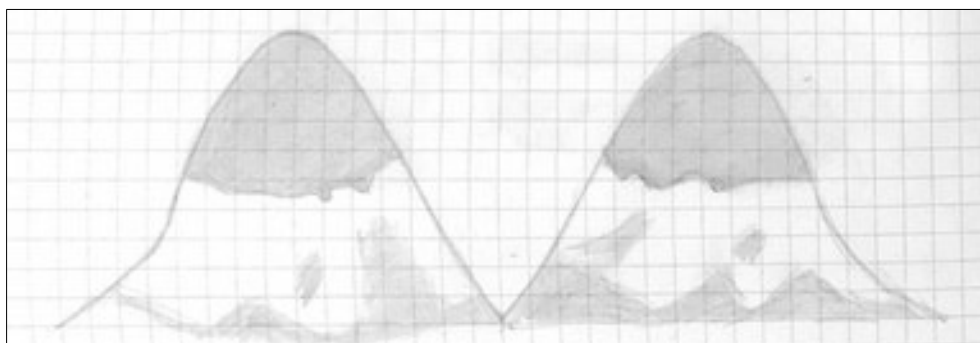

**Description:** Male; 3.5 feet when identified then grew to maturity. Light dot on back of head.

**Sessions attended:** 68-76, 78, 79, 82, 85, 86, 90, 93, 94, 96, 97, 99, 101, 103, 104, 107, 108, 111, 113, 114, 116-118, 121-126, 128, 130, 133, 135-137, 144-146, 150, 152-159, 165, 168, 172-180, 182, 183, z6, z7, 185-190, z11, 191, z12, 195-208, 210, 212-217, 219, 223-225, 227-229, 233, 235, 236, 240, 241, 243-247, B8, B10, B11, z25, 252, 254, B16, 255, B18, B21, B23, B24, B27, z35, B36, B37, 260, B40, B41, 261, B45, 266, 267, 269, 278, 282

**Comments:** Spent more time in the lagoon than other males even after maturity. Disappeared.

## Shark 112

nickname:

*Jem*

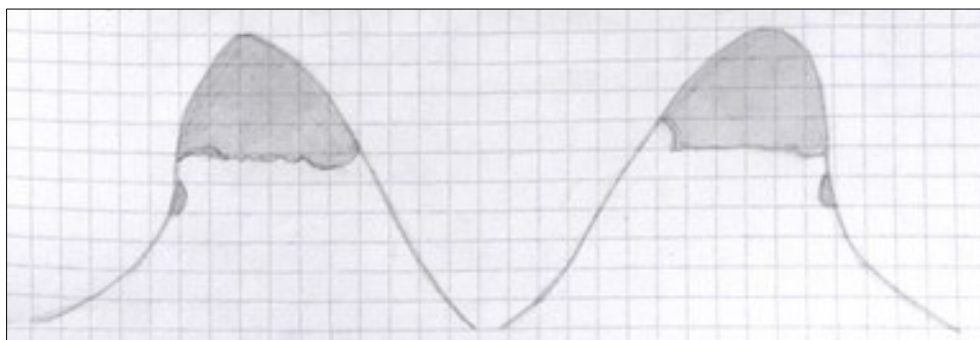

**Description:** Male; 3.5 feet. Many dots all over, little contrasted. White crinkling at the place where right ventral fin attaches to body.

**Sessions attended:** 98, 100-103, 106-108, 110-115, 118-120, 122-136, 138-141, 143-145, 148, 154, 155, 158, 160-169, 171-174, z1, 175-181, 183-205, 208-211, 213, 216-218, 220, 223-230, 232-236, 239-247, a19, B9, 252-255, B19, B24, z28, B25, B26, z30, z32, B33, B34, z35, B35, B39, 259, B40, 261, B43, 263-267, 269, 270, 273, 274, a27, 279, a28, 284, 285, a30, 286-289, 291, z40, 292, 293, z41, 295, z42, z43, 297, z45, 298, 300, 303, z51, 305, z55, z56, z57, z59, z60, z61

**Comments:** Came back at 154 with many others who had been absent for weeks. Z43—white crinkling that used to be just on the border between his right ventral fin and body have now spread, and are on his side, there, too.

## Shark 113

nickname:

*Courtney*

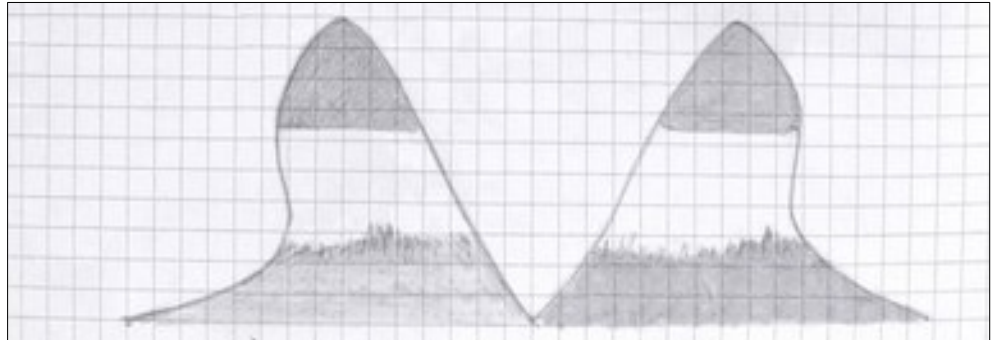

**Description:** Female; 6 feet, dark grey. Very wide white bands and straight tip lines both sides.

**Sessions attended:** 69

**Comments:** Older shark; dark skin mottled as if with old scars. Heavy build.

## Shark 114

nickname:

*Sunny*

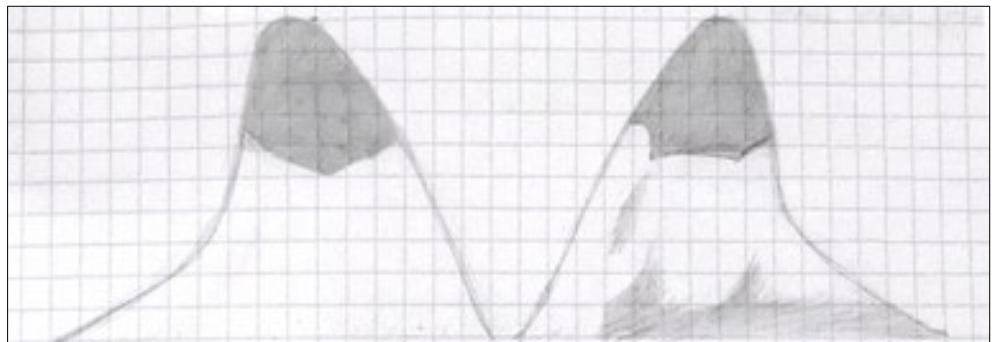

**Description:** Pup; 2 feet, deep bronze. Dot base dorsal fin, left side.

**Sessions attended:** 69, 70, 72, 74, 76, 78, 90, 91, 93, 104, 105.

## Shark 115

nickname:

*Marco*

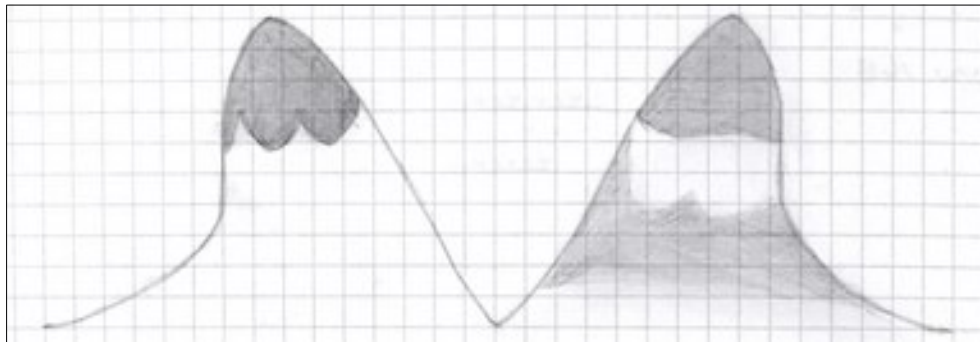

**Description:** Male; 4 feet, dark grey.

**Sessions attended:** 70, 97, 104, 109, 115-118, 121, 122, 126-128, 155, 156, 167, 168, 173, 174, 176, z5, 183, z7, z9, 186, z11, 231, 237, 239, 240, 242-244, a19, B20, B22, z30, 259, 264, 274, a30, a31, 287, 293, z41

**Comments:** 128: Initially he arrived always at sunset; on his first four visits he entered the site at precisely the moment that the sun lay like a ball upon the line of the horizon, four days before the dark of the moon, an initial clue to the precise movements of the sharks relative to the sun and moon. Later he came earlier at times to the sessions. Seen in barrens, June 29th, 01, in the morning. Association with Kilkenny.

## Shark 116

nickname:

*Raphael*

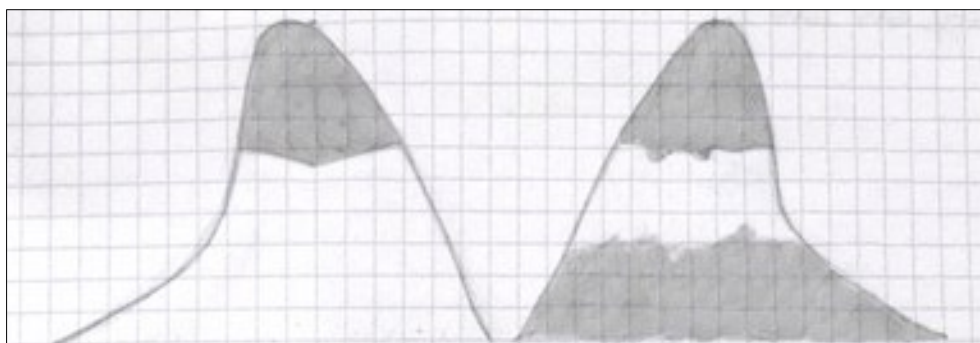

**Description:** Male; 4 feet, light grey.

**Sessions attended:** 70, 71, 75, 154

## Shark 117

nickname:

*Flare*

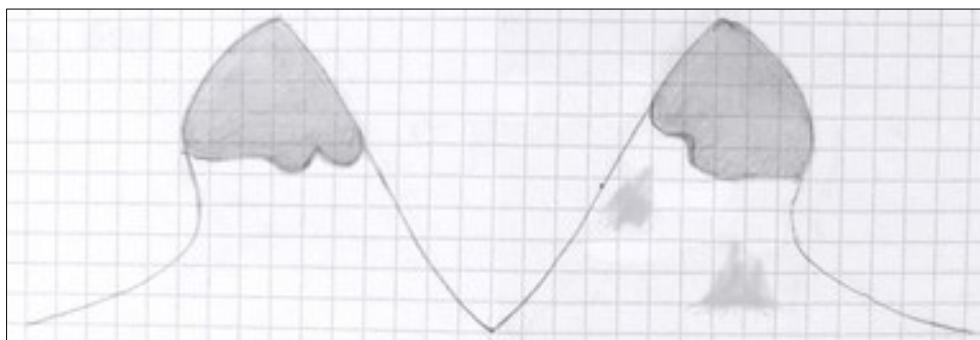

**Description:** Male; 4 feet, light grey. Flares on white band, many light marks.

**Sessions attended:** 70, 76, 78, 79, 80, 93

## Shark 118

nickname:

*Dapples*

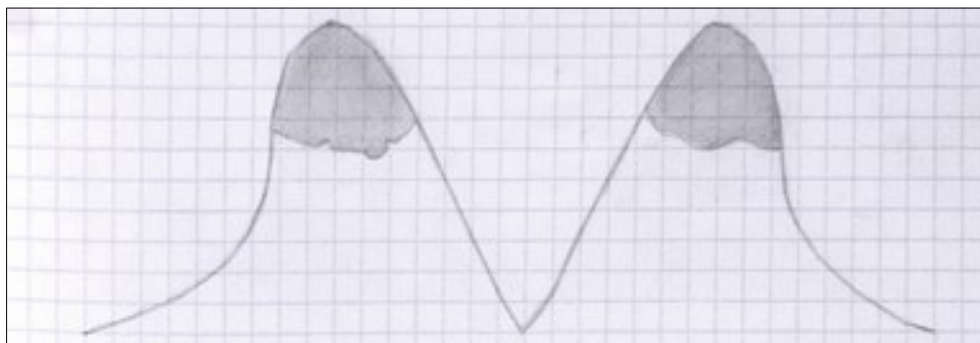

**Description:** Male; 4 feet, brown; sometimes grey. Many dark blotches and small black dots; in particular a large rounded triangular blotch, on right side behind dorsal fin. Another blotch on left pectoral fin.

**Sessions attended:** 70, 146, 155, 157, 165, 166, 174, 176, B2, 180-183, 186, 187, Ba2, 206, 207, 210, 223, 227, 242, 247, B39, 259, 261, 266, 271, 274, 278, 279, a29, 291, 292, 296, 298, 299, z56, z58, z60

**Comments:** Came January 29th, 1999. Came December 9th, 2000. Roaming in lagoon at noon June 8th, Sec B—came to next session, 180. In section B on September 6th, 01, 4:45 p.m., didn't come to session though I was trailing scent. Came with Gabriel to 206, with Mephistopheles to 210. Missing long time in 03; must have been far away.

## Shark 119

nickname:

*Kimberley*

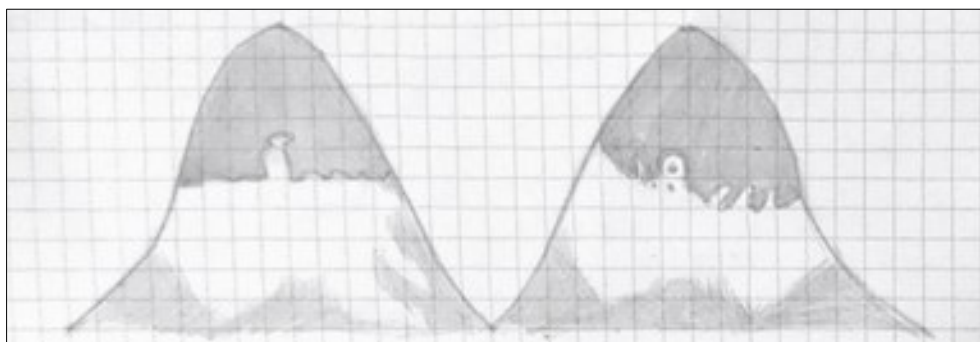

**Description:** Female; 6 feet, very dark grey; very elderly. White marks  $\frac{3}{4}$  inch across on each side of head, in the same place, matching.

**Sessions attended:** 70, 72, 73, 74, 76, 78, 104, 106, 113, 115, 116, 118, 124, 157, 164, 166-169, 176, z4, 206, 234, 235

**Comments:** She is the oldest and most scarred shark I've ever seen. In the area with Twilight whom she resembles dramatically; I think they are sisters. Out of 157 feedings, 2 out of 4 times that Dapples came, Kimberley also came, yet both come so rarely. At 157, 164, 166, (01) she came when it was almost too dark to see. At 166, 167, 168, and 169, she and Twilight came together. At 169, I saw them approach, Twilight following two minutes behind Kimberley, in her scent trail. They circled through the site and around down current where they performed a 'swim-by' (close pass) on meeting. Rare morning sighting in barrens, June 25th, 01.



## Shark 120

nickname:

*Antoinette*

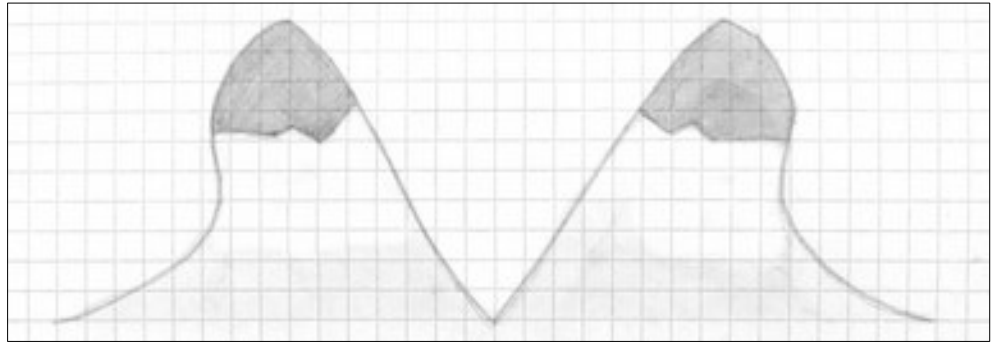

**Description:** Female; 6 feet.

**Sessions attended:** C5

## Shark 121

nickname:

*Jessica*

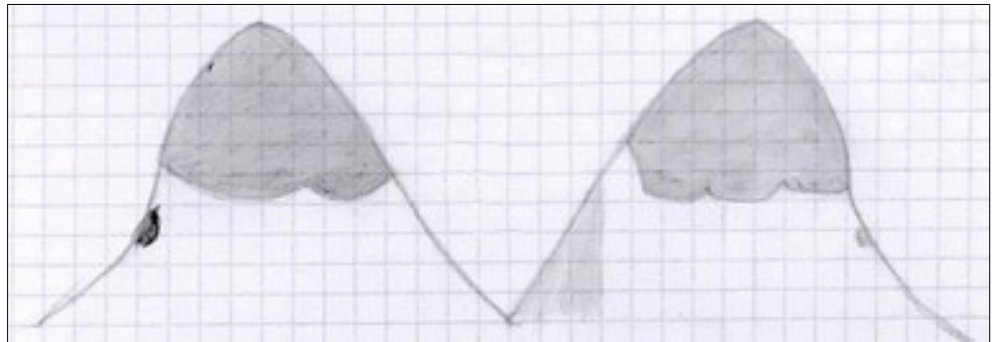

**Description:** Female; 5 feet, mid-brown. Black dot 3" to left side and in front of dorsal fin. Two light marks on tail, aligned horizontally, 2½" apart. 1 cm long, light mark on colour line at front 1/3rd of body, left side; light mark base of dorsal fin, right side.

**Sessions attended:** 72, 73, 79-86, 90-97, 100, 106-109, 111-114, 116, 118, 119, 123, 126-128, 130, 132, 135, 136, 144, 145, 147, 149, 151, 167, 172-181, z5, 184, z7, 190, z11, 191, 192, Ba2, 200, 202, 203, z18, 205, 225, 232, 233, 235, 243-247, B5, B8-B10, B15, 253, B19-25, B27, z32, B28, B29, B32, B34-36, B39, 259, B40, B41, B44, B45, 264, 266, 267, 269, 280, 281, 287- 289, 291, z41, 295, 298, z53, z59, z60

**Comments:** A few fresh mating cuts at 82, new ones; none before. Mated about Mar 10, 00. Right pectoral fin bitten and sliced 109; healing slowly. Very pregnant at 136, then stopped coming. Had pups by 144, Dec 1st. No mating wounds at 167 on her return. Seen in barrens, June 29th, 01. Seen in Section 2 September 6, 01, 4:45 p.m. roaming around on the edges of section B; must live in the west part of Section B. Had mated at 232, about 2 wks before, so about Feb 7 + or - a few days.

First noticed her skin problem in March 04, at 281, a rash covering most of the back of her head like eczema before it breaks out. Z41-Her rash is much worse. 295—getting worse slowly; didn't see her for a long time. On May 21st, 05, z53, the problem seemed to have sunk into the flesh, giving it a corrugated look over much of her dorsal surface and sides. Her fins looked okay, and there were few dark spots but her tail seems to be shredding. She reappeared over the next full moon period, then disappeared; likely died from her condition.

## Shark 122

nickname:

*Warlock*

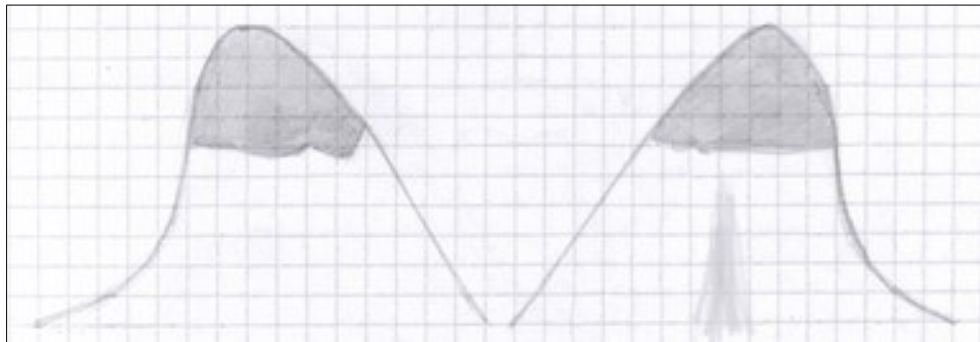

**Description:** Male; 4 feet, grey-brown.

**Sessions attended:** 73, 78-81, 86

## Shark 123

nickname:

*Windy*

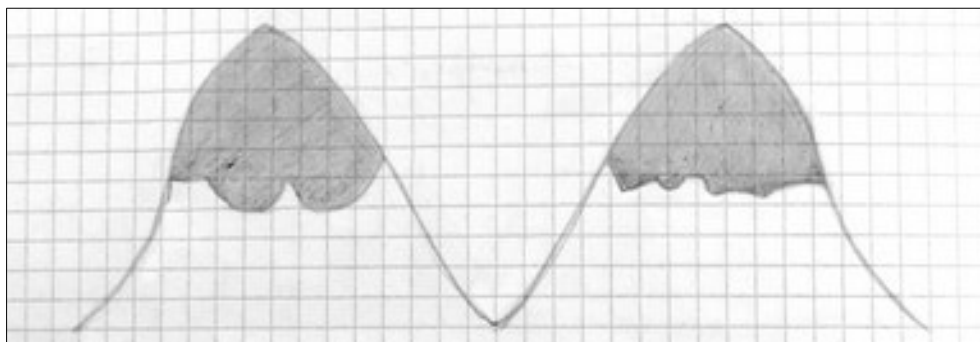

**Description:** Female; 3.5 feet, grey when identified. Became a big shark.

**Sessions attended:** 73-81, 87, 91, 95, 96, 98, 99-101, 103-105, 108, 109, 111-113, 115-122, 124, 126-132, 135-142, 144-146, 148, 152-155, 157-160, 162-168, 172-179, 183, 184, z7, 187-190, 192-196, z16, 199, 200, y10, 201, 204-207, 209-218, 220, 221, 223, 225, 226, 227, 233, 234, 236, 240-243, 245-247, O1, a18, a19, a21, 251-254, z26, 255, a25, 256, z28, z30-34 257-261, 263, 265, 266, 270-275, 277, a27, 279, 280, 281, a28, 284, 285, a30, 286, a31, 288, z38, 290, 291, z40, 292, 293, z41, 295-298, a35, 299, a36, 300-303, z49, z50, 305, z53, z54, z55, z57, z58, z60, z61

## Shark 124

nickname:

*Grace*

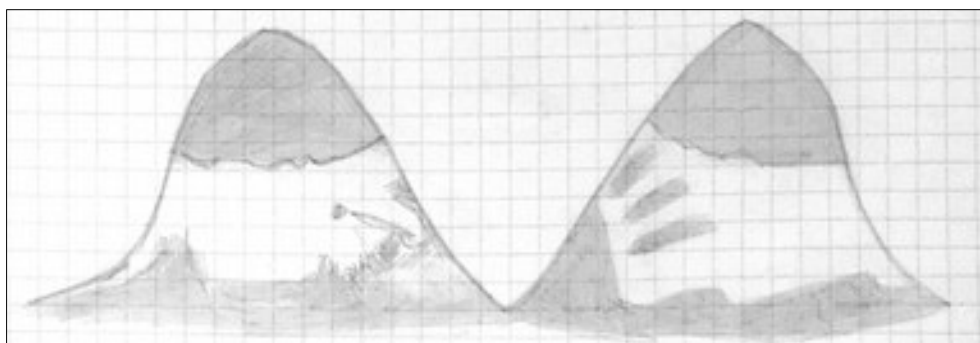

**Description:** Female; 5 feet, brown.

**Sessions attended:** 74, 84, 155, 246, B44, 265

**Comments:** Apparent association with Vixen; 155 is a year after 74

## Shark 125

nickname:

*Galipoli*

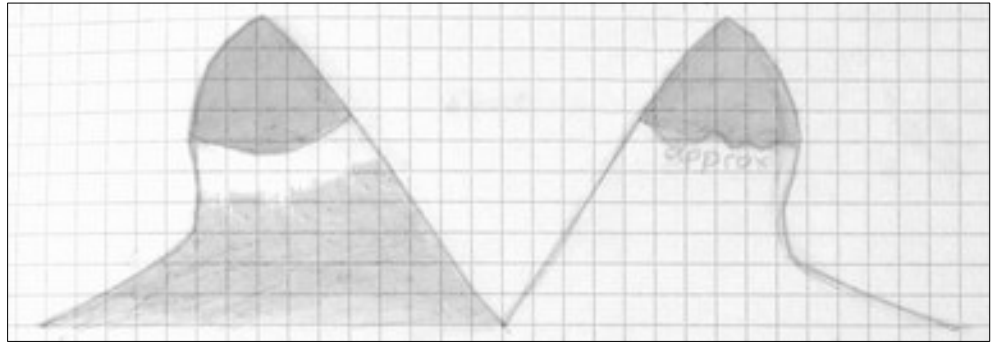

**Description:** Male juvenile; 3 feet, grey. Light markings right side.

**Sessions attended:** E3

## Shark 126

nickname:

*Muckle*

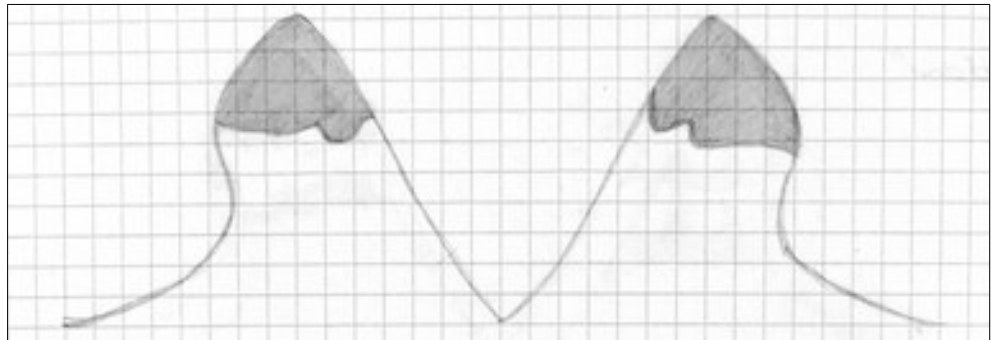

**Description:** Pup; 2 feet. Right pectoral fin is deformed; it is too big, and angled as if broken.

**Sessions attended:** B8

## Shark 127

nickname:

*Seth*

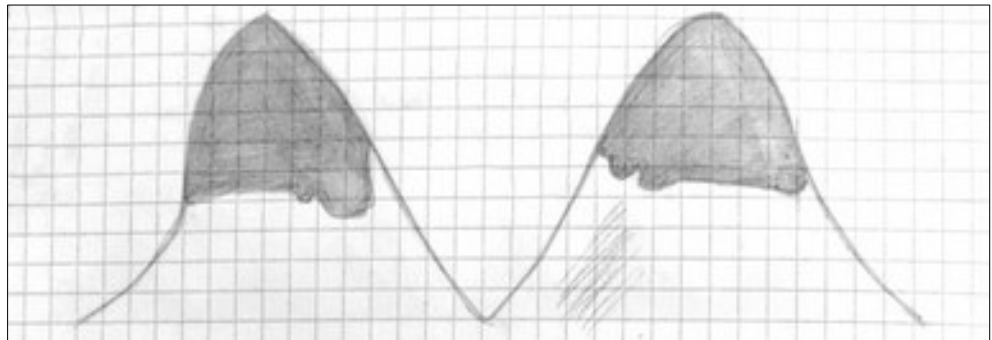

**Description:** Male; 4 feet. Large light dot base tail, left side.

**Sessions attended:** 74, 75, 76, 78, 79

## Shark 128

nickname:

*Cassandra*

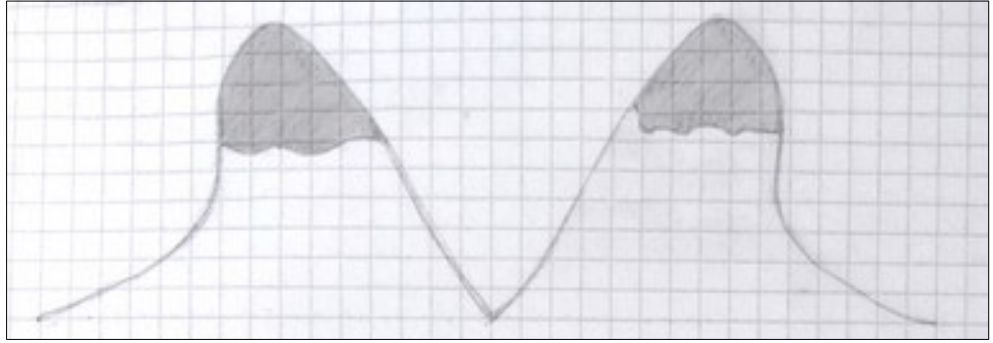

**Description:** Female; 5 feet, brown. Lower lobe of tail missing.

**Sessions attended:** 75

**Comments:** Mating wounds healing at 75; mated about 2 weeks before.

## Shark 129

nickname:

*Raindrop*

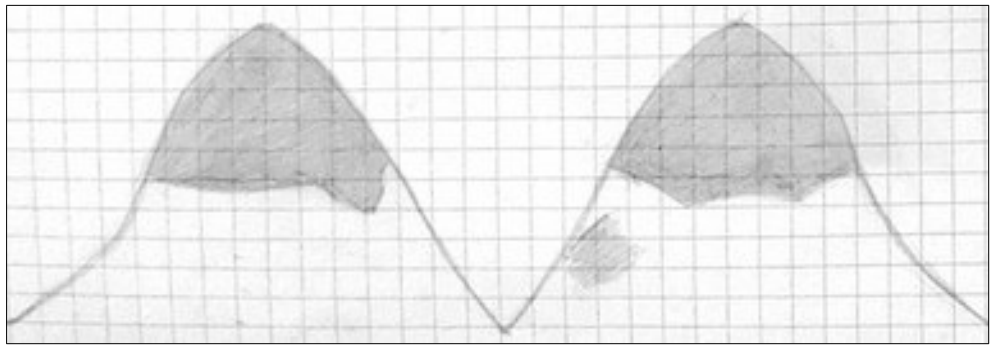

**Description:** Female juvenile; 4 feet, grey-brown. A white dot 2" from the tail tip left side.

**Sessions attended:** 66, 70, 71, 76, 79, 81, Ay1, 173

## Shark 130

nickname:

*Chime*

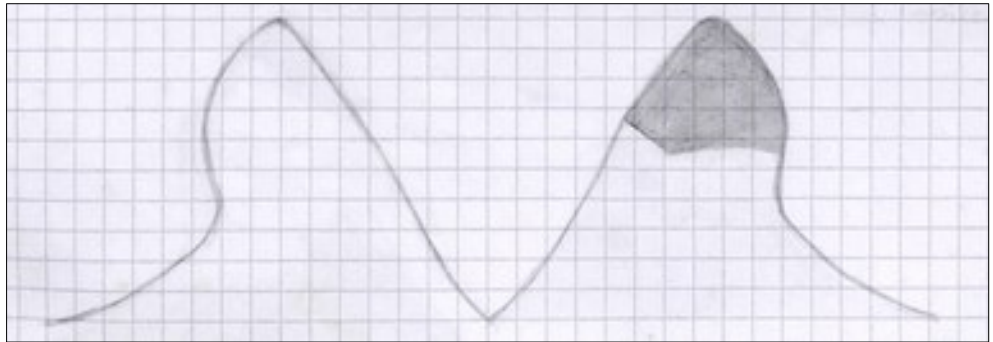

**Description:** Female; 6 feet, brown. Three six inch diameter dark blotches on back and head.

**Sessions attended:** C5

## Shark 131

nickname:

*Plato*

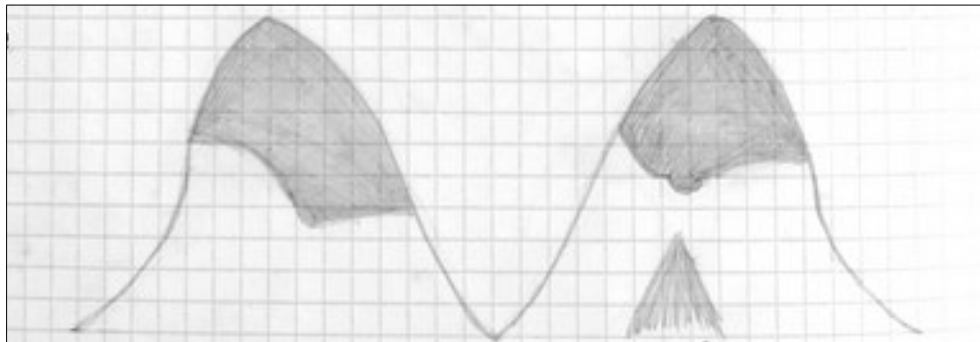

**Description:** Large male; > 4 feet, grey-brown.

**Sessions attended:** 77, O1

**Comments:** Incredible ocean sighting after such a long interval, right across the reef from the main site.

## Shark 132

nickname:

*Aquinas*

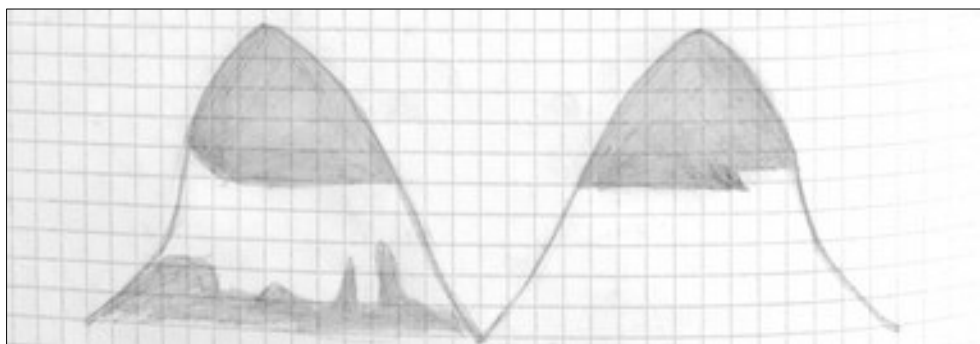

**Description:** Male; 4 feet.

**Sessions attended:** 77

**Comments:** Came with Plato.

## Shark 133

nickname:

*SparkleToo*

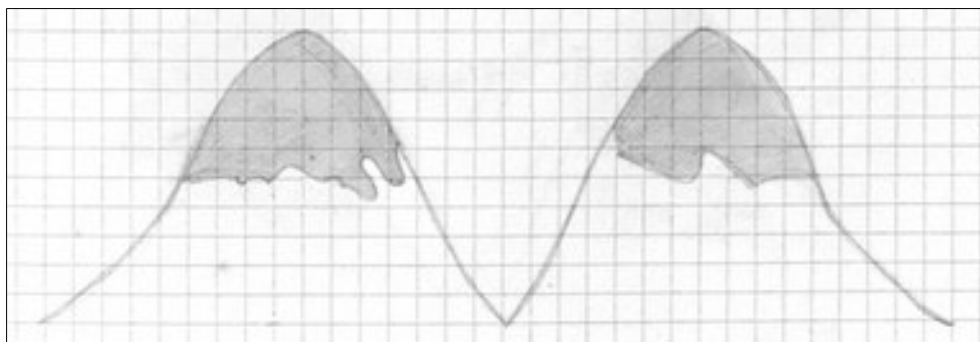

**Description:** Female; 4 feet medium brown when identified; became a big shark.

**Sessions attended:** 78, 81, 84, 86-88, 98, 103-114, 117-124, 126, 128, 131, 133, 135, 138, 139, 143, 151-158, 160-164, 166-168, 170-178, y2, 179, y4, 181, z4, 182, z6, 184-199, 201, 202, 206-209, 212, 213, 215-217, 220, 224, 225, 228-234, 236-238, 240-246, B8, Ba3, B9, B10, B11, B15, 254, 255, B19, B21, B23-25, B27, z32, B33, B36-B38, 258. B39, 260, B40-43, 263

**Comments:** Fast became a regular, staying a long time, often till the end, long after the



others left, or leaving and returning to cruise the vicinity as darkness fell. Mating wounds at 151; mated 2 to 3 weeks ago; December 10th to 17th approx. Followed boat from z6 to 184. Stuffing herself at 206 while belly/ventral fins super distended and you could see into her body through her cloaca. (Scientists report that sharks don't eat before birthing—probably not in aquariums due to stress from being unable to go to the nursery they prefer.) Had pups 5 days later. Had mated at 220, between Dec 11 and Jan 6, 02. Mated week before 228, 02/02/02. Disappeared when sharks were being finned. Presumed finned.

## Shark 134

nickname:

*Tamarack*

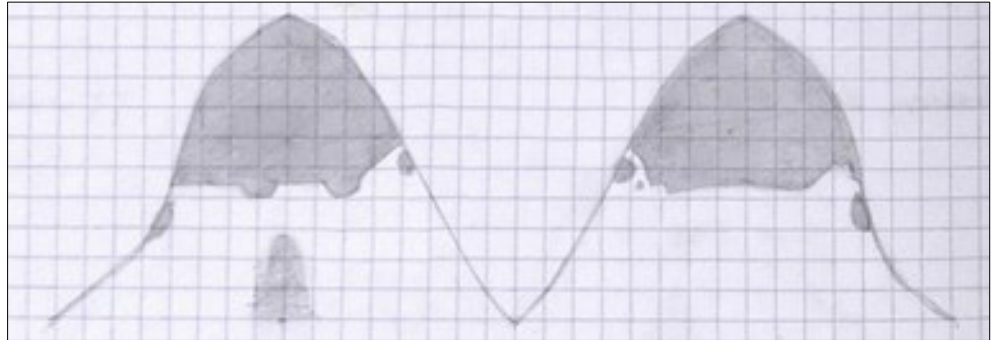

**Description:** Juvenile male when first identified; 3 feet. Small claspers. Light dot on mid right side visible from a bit of a distance; closer, several more are visible in a line a few inches long, including a couple of tiny dark marks. A dark mark on left side.

**Sessions attended:** 78, 81, 83, 85, 87-91, 93-97, 99, 101, 103, 104, 106-108, 110, 115-118, 120-126, 128-130, 132, 134, 136-144, 146-150, 152-156, 158, 161-172, 174-181, y6, 182-185, 187, 188, 190, 192, 194-196, Ba2, 197-199, 201-204, 206, 208, 209, 212, 213, 215, 216, 220, 224-245, 247, a19, z24, 248, B14, 252, 254, 255, z32, B28, B29, z33, z34, B32, B36-40, B43, B44, 265, 266, 268-271, 273, 274, 279, 280, 281, a28, 282-284, a29, 286-293, 295-303, a38, 304, 305, z53, z60, z61

**Comments:** Claspers an inch long when I first saw him, Feb 24, 00. At 115, 2 inches long, claspers look normal size for his size at 146; a year to grow! Often stays til the end, and continues to cruise the site after the others have gone. After noting that he'd been coming always at the end of the session, found him roaming in Section B on 06/09/01, at 4:45 p.m. Came to session 197 after—must have followed me—arrived at Section A site at same time as me. After that, came at the beginning and stayed til end. At 213 his claspers were swollen, so he must be mature this year, 2001. Two years to mature after claspers start growing? Once he followed me almost all the way home, far down the bay, a unique act.

## Shark 135

nickname:

*Arcangela*

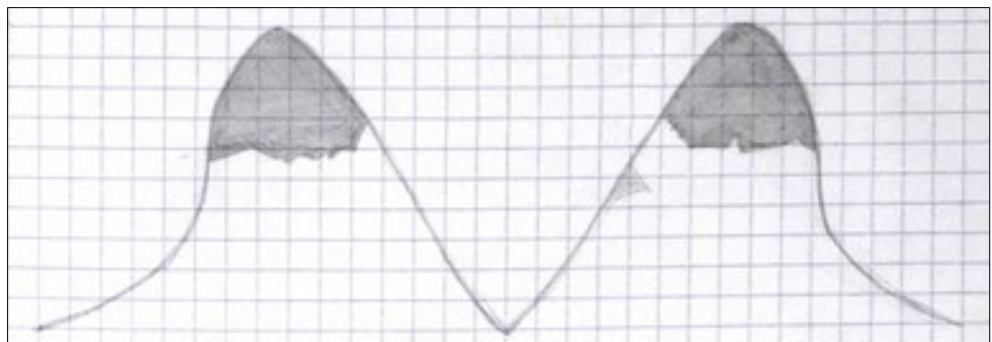

**Description:** Female; 5.5 feet.

**Sessions attended:** 80, 82, 92, 94, 127, 144, 148, 158, 164, 165, 171, 229, 230, 232-238, 240, 243, 244, B3, B4, B11

**Comments:** Came with Twilight and Alexandra; later came with Celeste, and others; see notes. Visits coincide with Twilight's quite closely, especially after Kimberley died. 237 arrived with Twilight.

## Shark 136

nickname:

*Alexandra*

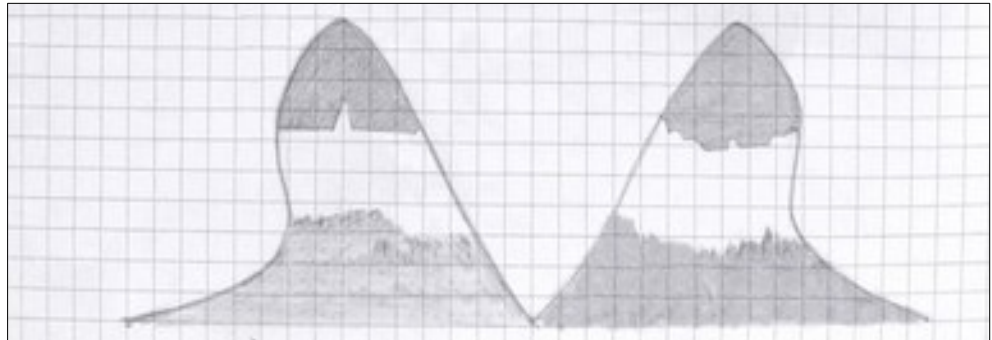

**Description:** 6 feet light grey-brown, wide white bands both sides.

**Sessions attended:** 80

**Comments:** Apparently with Arcangela during her only visit.

## Shark 137

nickname:

*Twilight*

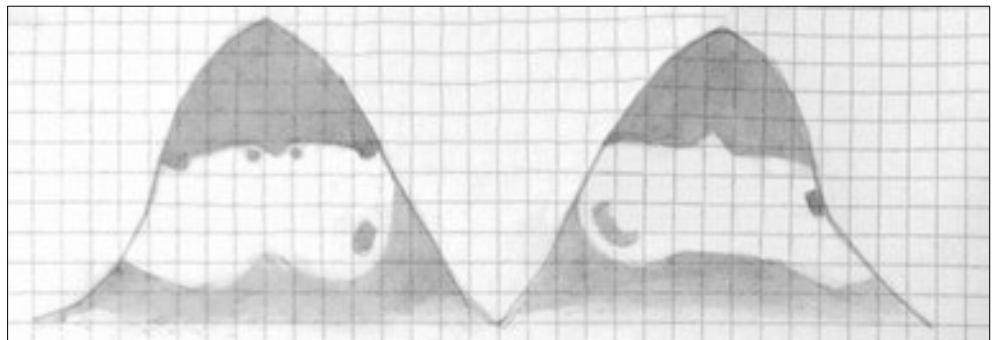

**Description:** Female; 6 feet, pale grey-brown—the colour of the water at dusk. She had a fainter snowflake, about 2 cm across, on the sides of her head in exactly the place that Kimberley did, on a line extended from the lateral marking.

**Sessions attended:** 80, 82, 85, 86, 104, 115, 117, 145, 156, 160, 162, 166-170, 176, z2, z6, 214, 228, 231, 236, 237, 240, 245, B5-7, B16, B20, z28, B28, B30, B36, B40, B41, 261, B43, 265, 280, a28, 287, 289-292

**Comments:** Initially always came as night fell, so named. Visits the area when Kimberley does, and they share a remarkable physical resemblance, even to the dorsal fin markings. Believe they are sisters. Came together at 166, 167, 168, 169 at nightfall; at 169, she arrived following in Kimberley's scent flow two minutes behind. She or Kimberley often appear in the same moon phase as Dapples. Mated week before 02/02/02 (228). Came to same

session as Marco, 231, 237, 240, Kimberley appearing at intervening sessions. Began coming with Arcangela after Kimberley disappeared. Arrived with her at 240; saw them roaming together. At 280 her white markings much more white and outlined.

### **Shark 138**

nickname:

*Eve*

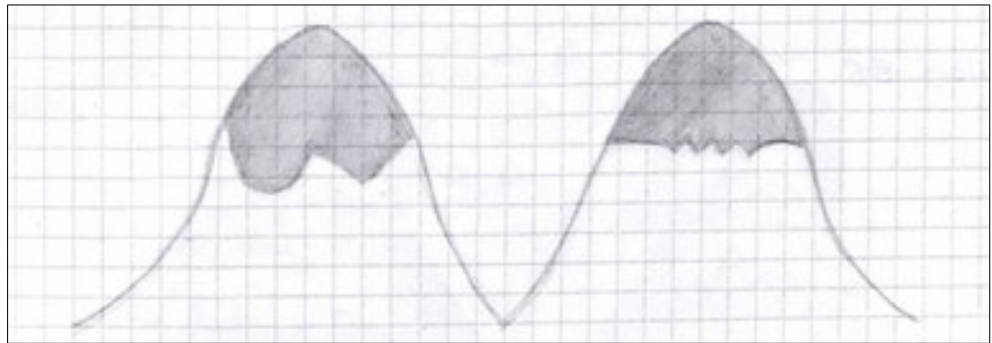

**Description:** Female; 5.5 feet, grey; White dot mid right side with fainter one 8 inches posterior to it.

**Sessions attended:** 82, 83

### **Shark 139**

nickname:

*Jewel*

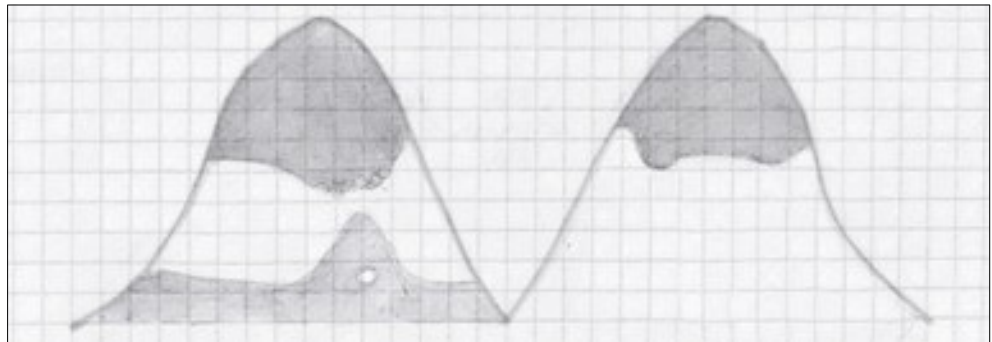

**Description:** Female; 5.5 feet, dark grey.

**Sessions attended:** 83

### **Shark 140**

nickname:

*Fleet*

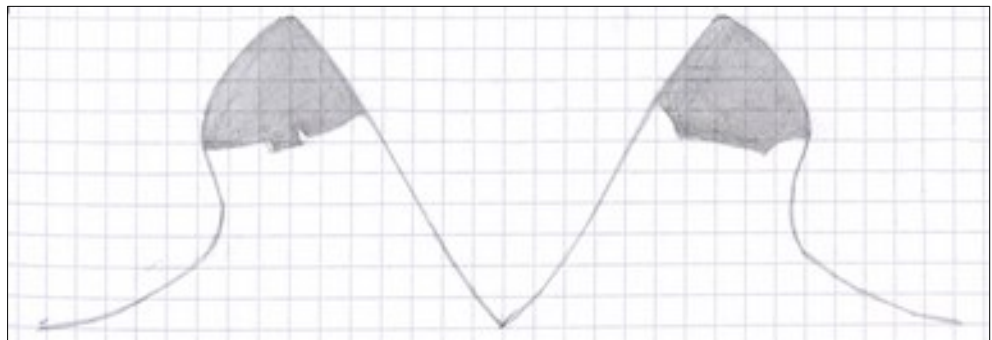

**Description:** Male; 4 feet, grey.

**Sessions attended:** 83, 91, 142, B33 269, 270, 272, 274, 278, a27, 300, 303

## Shark 141

nickname:

*Concorde*

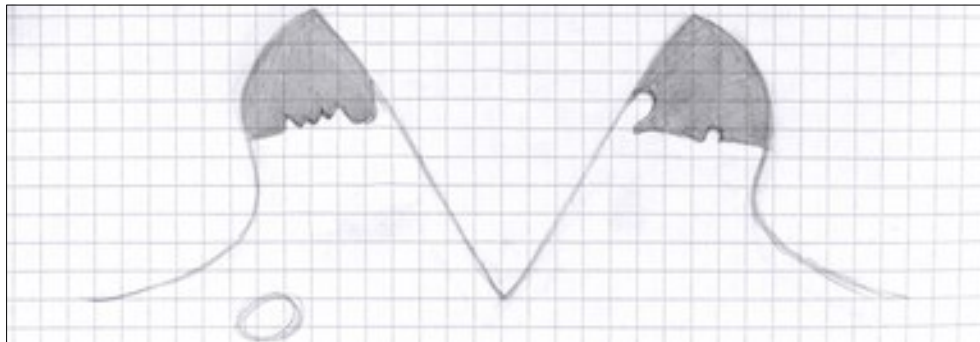

**Description:** Female; 6 feet. White dot on right side of body, off-centre, and one below dorsal fin.

**Sessions attended:** 84, B5, 259, a28, 286, z56

**Comments:** At the border in March 04, May 03, both times with Odyssey and Cheyenne, though not with Clementine, so far as I could see in 04. Came to 286; Odyssey and Clementine came to 285; BBC filming in between, which may have kept rare visitors down-current. But she was in the area in the approximate time frame in 2004 that Odyssey and Clementine also visited, which is still remarkable. Cheyenne was also present, coming to 287, 285.

## Shark 142

nickname:

*Bunting*

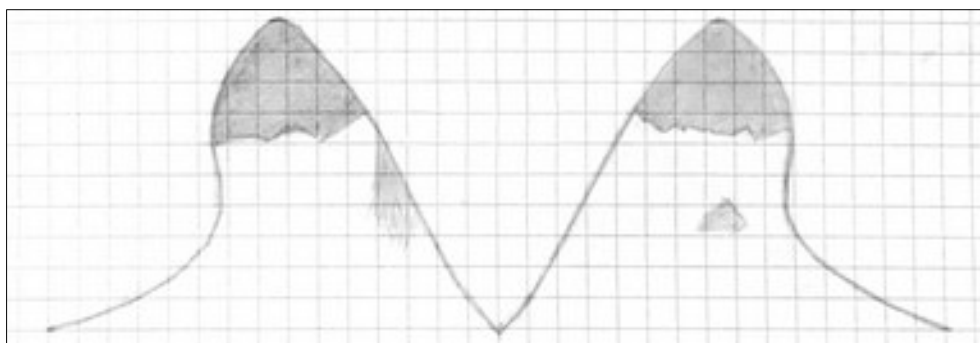

**Description:** Male; 3.5 feet, grey. No distinguishing features.

**Sessions attended:** 85, C4, C5, C6

## Shark 143

nickname:

*Violet*

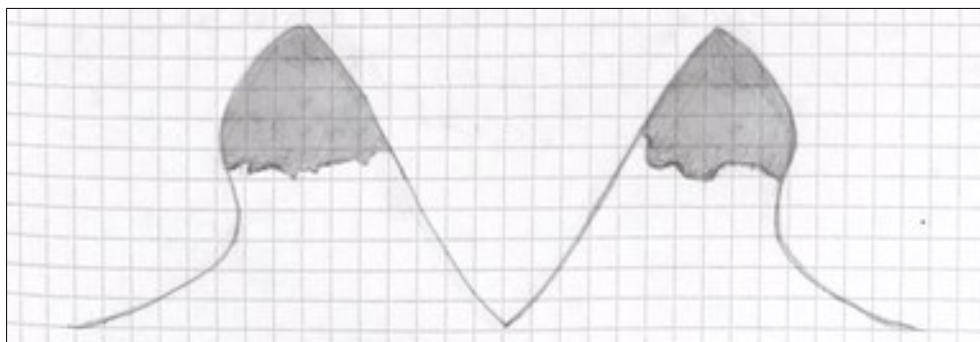

**Description:** Female; 5.5 feet, grey

**Sessions attended:** 87, 88

**Comments:** Came with Plato.

## **Shark 144**

nickname:

*Marilyn*

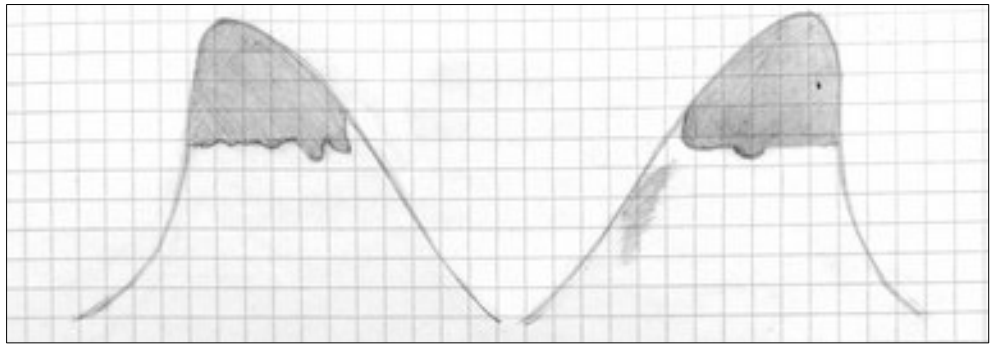

**Description:** Female; 6 feet, light grey-brown.

**Sessions attended:** 89, 166

**Comments:** Came March 31st, 2000, April 2<sup>nd</sup>, 2001.

## **Shark 145**

nickname:

*Miranda*

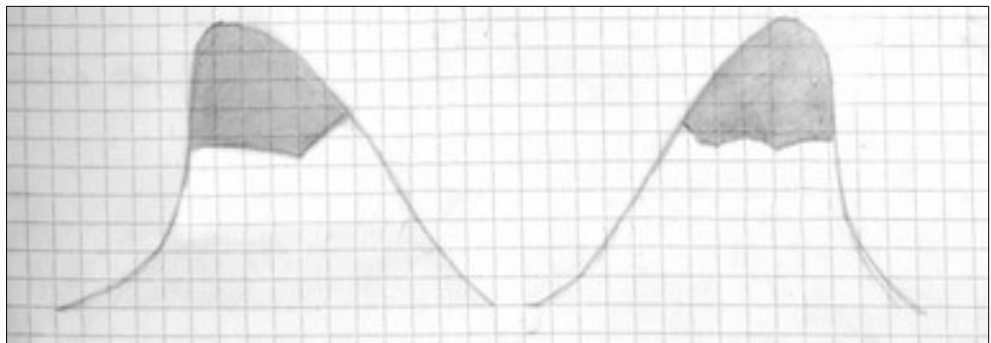

**Description:** Female; 5.5 feet, grey.

**Sessions attended:** 92, 164

**Comments:** April 10<sup>th</sup>, 2000, March 24<sup>th</sup>, 2001. Came both times with Arcangela.

## **Shark 146**

nickname:

*Peri*

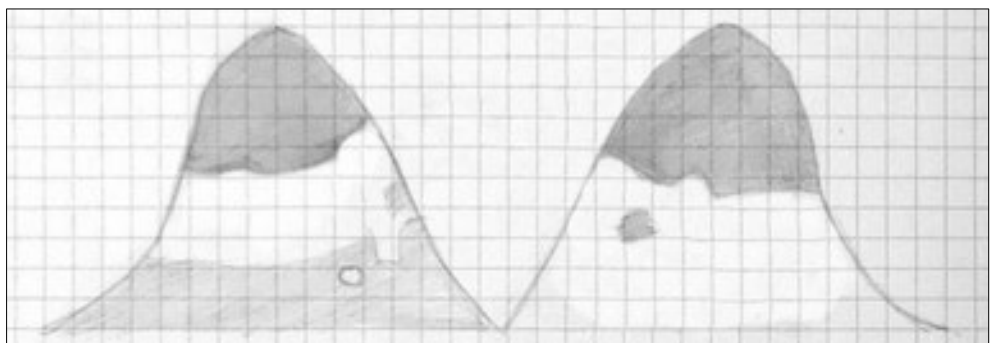

**Description:** Male; young when identified, 3.5 feet. White on gills on right side, dot base dorsal fin, and on grey band right side.

**Sessions attended:** 81, 90, 93, 94, 97, 99, 102, 106-110, 112-114, 116, 118-123, 126-128, 131-133, 136, 138, 155, 157, 162, 166-168, 170, 171, 173-179, 181, 182, 184, 185, 187, 190, 192-195,



203, 235, 237, 240, 241, 244, 245, 251, 254

**Comments:** Quickly became a regular, very adept at getting the good chunks of meat. Absent for long periods: 138 to 155, 203 to 235. Disappeared.

### Shark 147

nickname:

*Mara'amu*

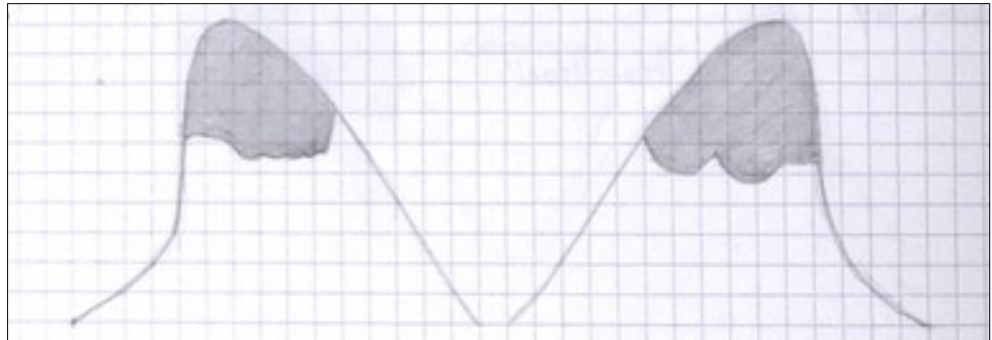

**Description:** Female; 4 feet, light brown.

**Sessions attended:** 95, 97-99, 102-106, 109, 110, 113-116, 118, 120-123, 126-128, 130, 132, 134, 135, 137-148, 151, 152, 154-156, 158, 160, 162-167, 169-172, 174, 176-179, 181-183, 186-188, 190, 192, 195, z13, 196-203, y12, 204, 205, 210, 211, 213, 215, 218, 220, 221, 223, 225-227, 229-243, 245, 246, B6, B9, B10, 252, 254, 255, B18, B19, B21, B23, B24, z28, B25-27, z32, B28, B29, z33, B34, 259, 260

**Comments:** Disappeared during the shark finning.

### Shark 148

nickname:

*Christian*

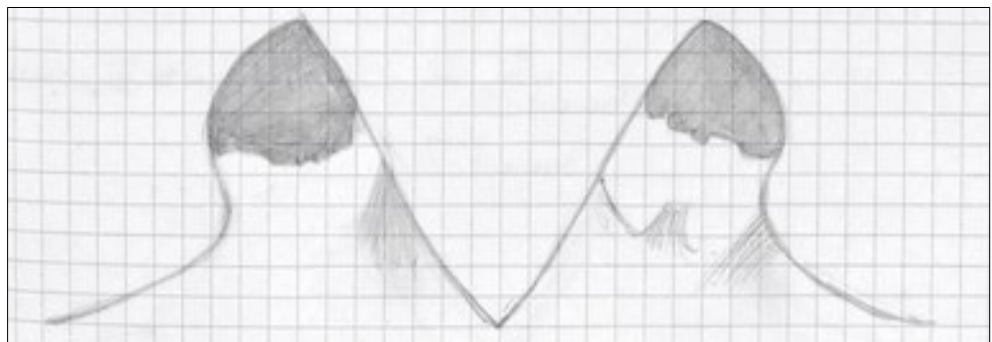

**Description:** Male; 4 feet, grey.

**Sessions attended:** C6, O3

### Shark 149

nickname:

*Fleece*

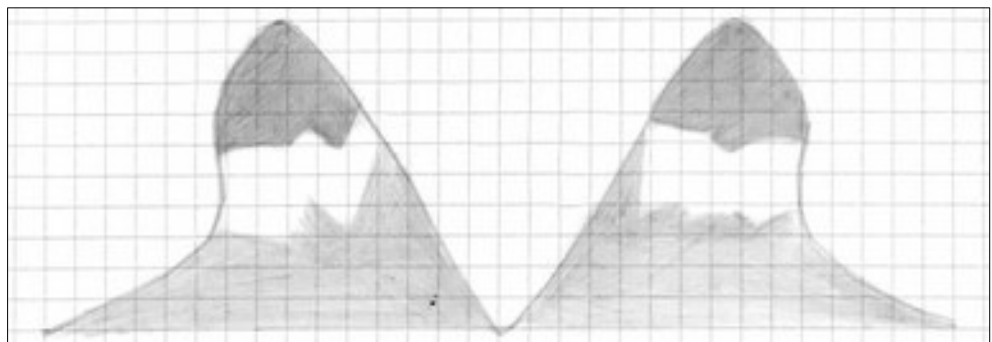

**Description:** Male; 4 feet, brown.

**Sessions attended:** C6

## **Shark 150**

nickname:

*Spark*

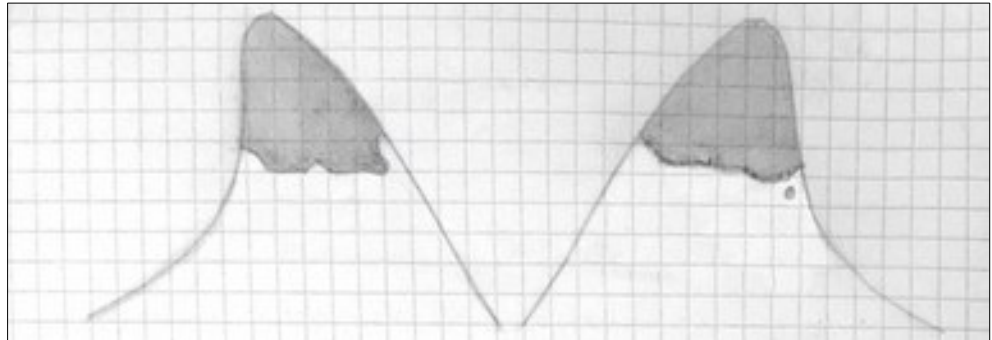

**Description:** Female; 3.5 feet, light brown.

**Sessions attended:** 100, 109, 111, 112, 113, 116, 118, 120, 123, 125, 129-131, 133-136, 141, 142, 144, 146, 152, 154-159, 163, 164, 166, 169, 174, 177-181, z4, 185, 186, z9, 187, 190, 192-195, 198, 200-203, 206-211, 213, 215-218, 220, 221, 223, 225-236, 242

**Comments:** Disappeared.

## **Shark 151**

nickname:

*Eclipse*

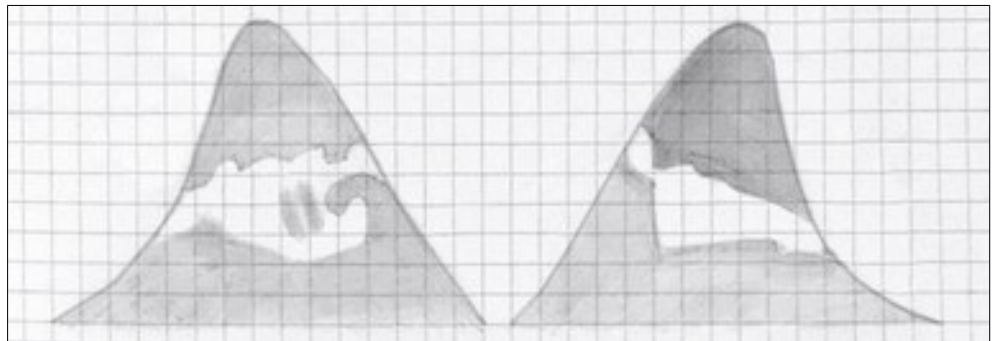

**Description:** Female; 6 feet, dark grey. Two light dots one inch apart aligned horizontally on right side of tail base.

**Sessions attended:** 104, 114, 115, 117, 119, 132, 134, 154, 178, 184, 192, a19, B10, 259, 286, z41, 295, 296

**Comments:** Always comes as night falls, from left to right, grabs a scrap, and exits to the right. Pregnant in 2000, Pregnant in 2001, z41 only day sighting during the day, likely resting in the barrens.

## Shark 152

nickname:

*Arabesque*

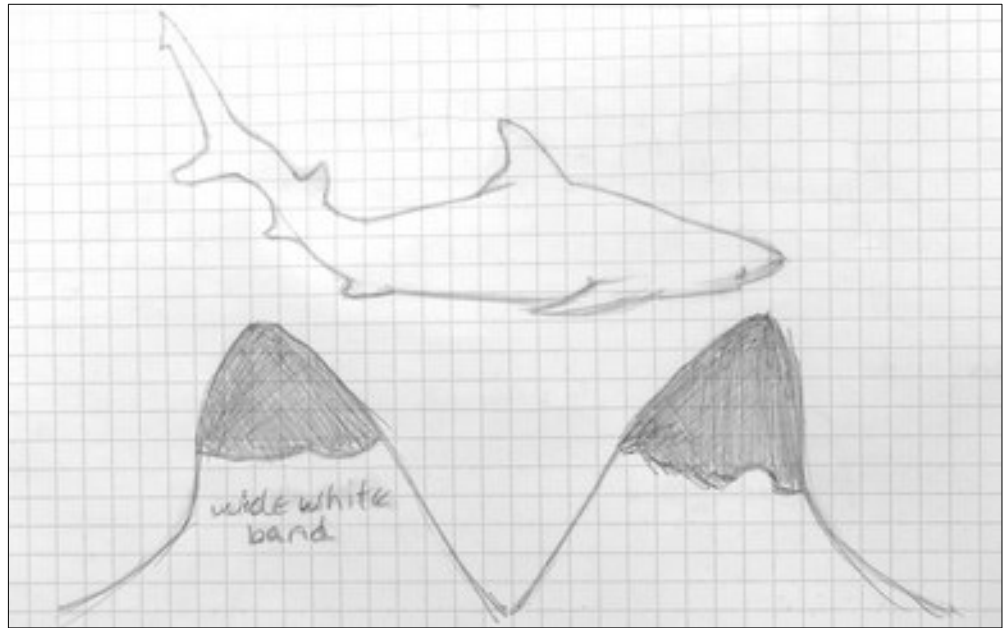

**Description:** Female; 4 feet, light brown. Deformed spine; her tail waves above the level of her back.

**Sessions attended:** 105, 129

**Comments:** Managed to grow into a large shark in spite of her deformity.

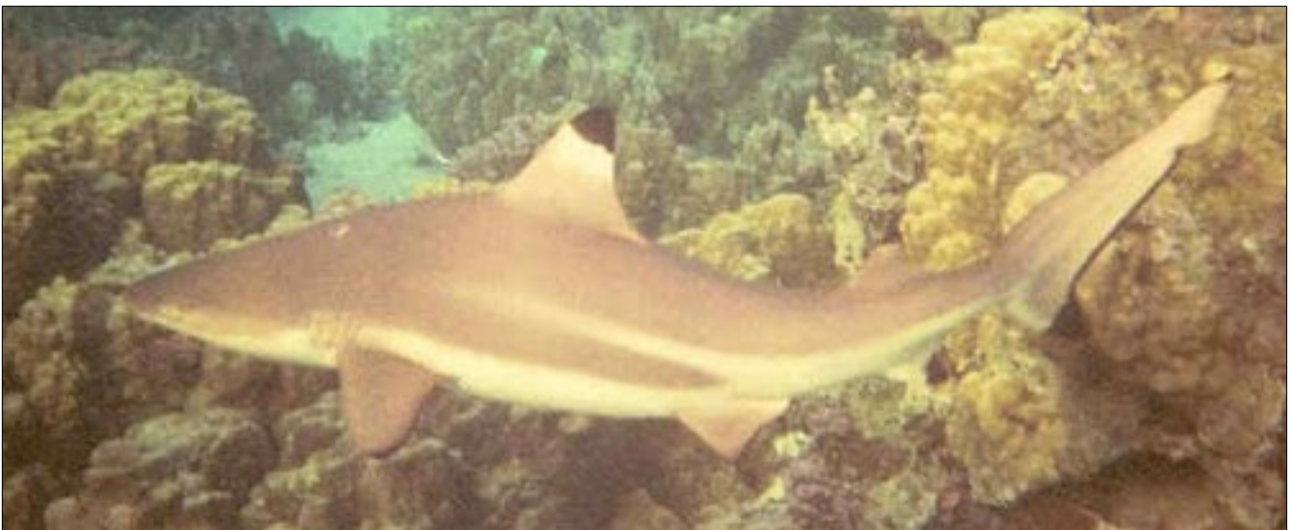

## Shark 153

nickname:

*Glammer*

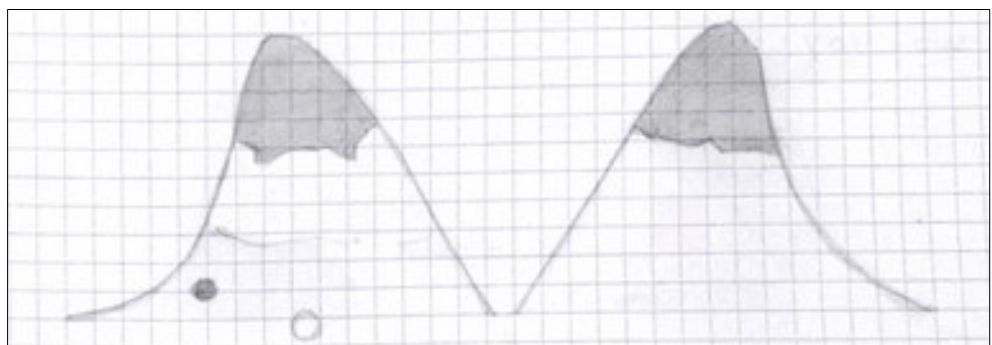

**Description:** Female; 5 feet, grey. Bright areas on light lateral mark posterior to dorsal fin both sides; a light dot base of dorsal fin right side, black one above and behind it—see drawings—and a light dot just above the black tip of the lower lobe of tail right side.

**Sessions attended:** 105, 113-115, 118, 132, 151, 154, 156, 157, 163-165, 167, 168, 170, 174, 177, 179, 185, 190, 193, 195, 197, 202, 203, 206, 207, 209-217, 222, 223, 226, 229, 230, 235, 238, 240, a19, B10, z25, 253, 254, z31, z32

**Comments:** Strong association with Annaloo. Came with Eclipse at 163 and they roamed the vicinity together. Left during the period between 179 and 185, while Annaloo regularly attended; they did not leave together. Mated Dec 11 to Jan 11, (217 to 222) ~ a week before, so Jan 4th + or -. Disappeared.

## Shark 154

nickname:

*Flute*

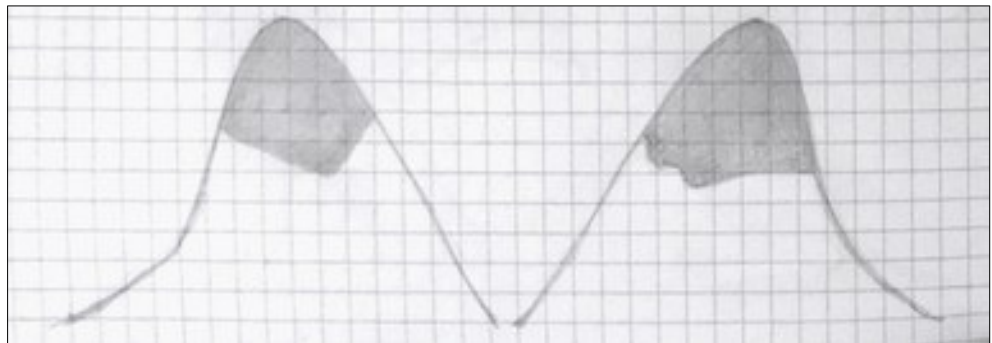

**Description:** Pup; 2.5 feet, bronze.

**Sessions attended:** 107, 109, 111-114, 119-125, 127-131, 133-138, 141-145, 147, 148, 152-158, 161, 162, 164-166, 169-179, 182-184, z6, 186-188, 190, 192, 196, 197, 200

**Comments:** Very curious about me for a period; associated with Piccolo, at least initially. They were not long out of their refuges of thick coral when they first investigated the sessions. Often along the fringes of the barrens.

## Shark 155

nickname:

*Nocturne*

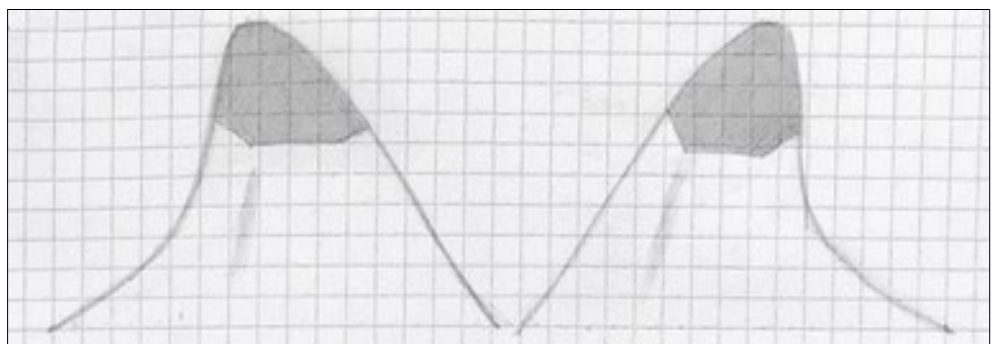

**Description:** Female; 3.5 feet, bronze; many pale dots on her skin.

**Sessions attended:** 109, 112-116, 118, 121, 124, 128, 141, 146, 160, 167, 168

## Shark 156

nickname:

*Bubbles*

**Description:** Female juvenile; 3 feet, brown. Many large pale blotches; in particular two roundish ones, one 1" in diameter, the other 1½" in diameter just posterior to dorsal fin left side.

**Sessions attended:** 109, 168

**Comments:** Considering how recognizable she was it was notable that she never appeared again; she did not stay long enough for me to draw her dorsal fin.

## Shark 157

nickname:

*Platinum*

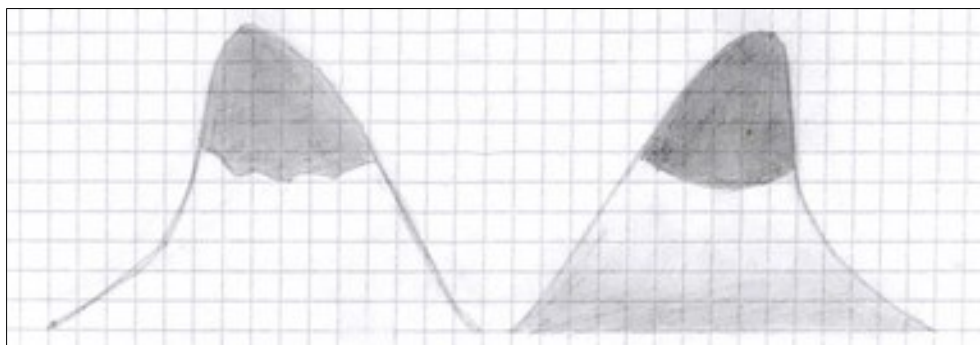

**Description:** Male; 3 feet, very pale gold.

**Sessions attended:** 110, 111, 113, 118-120, 124, 127, 128, 139

**Comments:** At 127, Platinum has turned brown; came from deeper water?

## Shark 158

nickname:

*Piccolo*

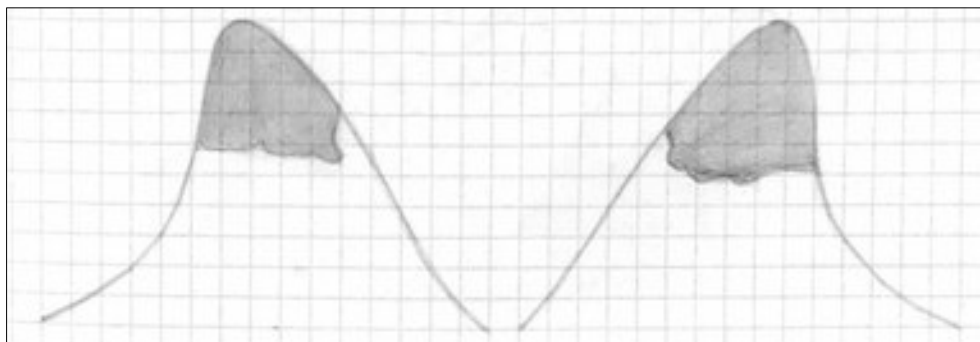

**Description:** Pup; 2.5 feet, bronze.

**Sessions attended:** 112-114, 118, 119, 122, 124, 127-129, 133-135, 137, 138, 143, 148, 151, 155, 156, 166, 173, 181, 183, 186, 187, 190, 192, 195, 199, 200, 209, 210, 215, 216, 224, 225, 238, 254

**Comments:** Speculate that Piccolo and Flute are siblings, for they resembled each other closely.



## Shark 159

nickname:

*Anastasia*

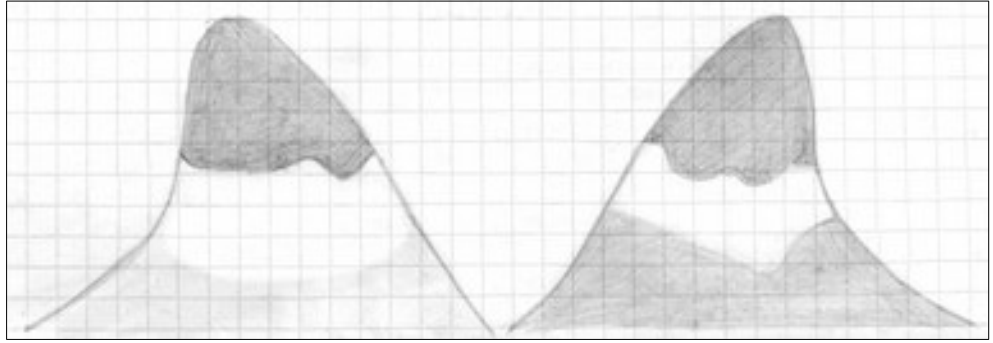

**Description:** Female; 5.5 feet, dark grey.

**Sessions attended:** 113

## Shark 160

nickname:

*Amber*

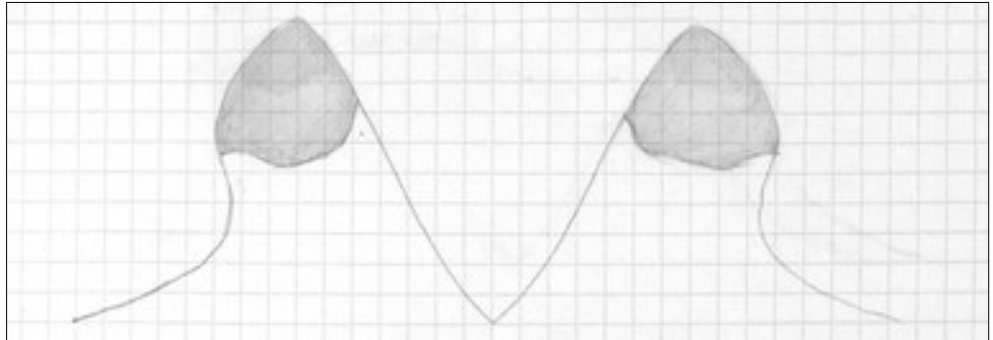

**Description:** Juvenile female; 3.5 feet, bronze. 1.5 cm white circle on the lateral line, towards the front of the body, right side.

**Sessions attended:** 113, 116, 118-120,

**Comments:** Another juvenile who stayed around for awhile and disappeared.

## Shark 161

nickname:

*Borodin*

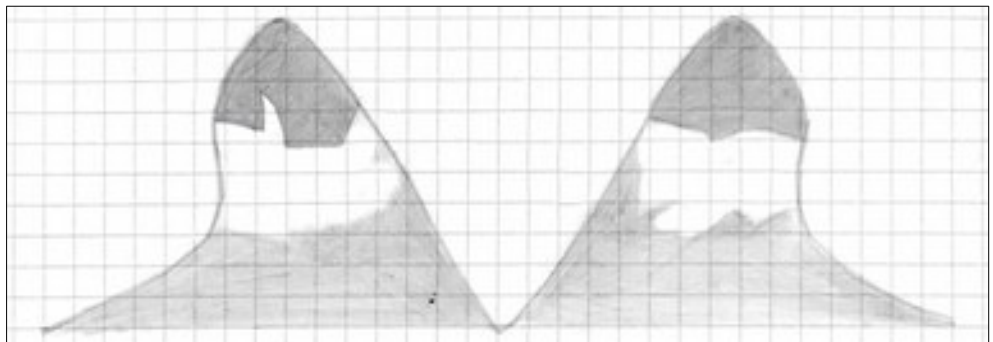

**Description:** Male; 4 feet, grey.

**Sessions attended:** 116

## Shark 162

nickname:

*Cinnamon*

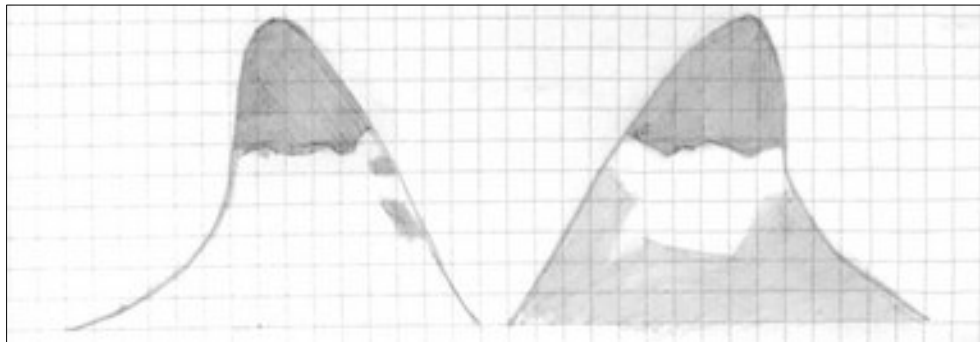

**Description:** Female; 5 feet, light colour—pale gold or yellow ochre. Low-contrast dark diamond of 4 dots, 5" high, each 2cm across, on her back below the leading edge of her dorsal fin on the right side.

**Sessions attended:** 116, 123, 180, z4, z8, 186, 187, z9, 191, z13, z14 z15, 206, 210, 230, 239, 240, 242-245, a18, a19, z23, 251, B20, B22, B27, B29, B32, B34, B24, 258, 260, B40, 261, 267, 283

**Comments:** She seems to be most of the time on the other side of the barrels in Section B. Became an unusually big shark while still young.

## Shark 163

nickname:

*Clara*

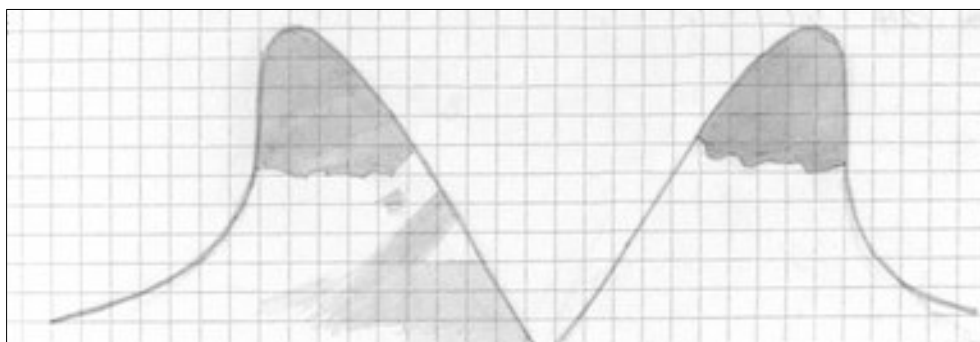

**Description:** Female; 5 feet, light brown

**Sessions attended:** 117, 135, C4

## Shark 164

nickname:

*Trillium*

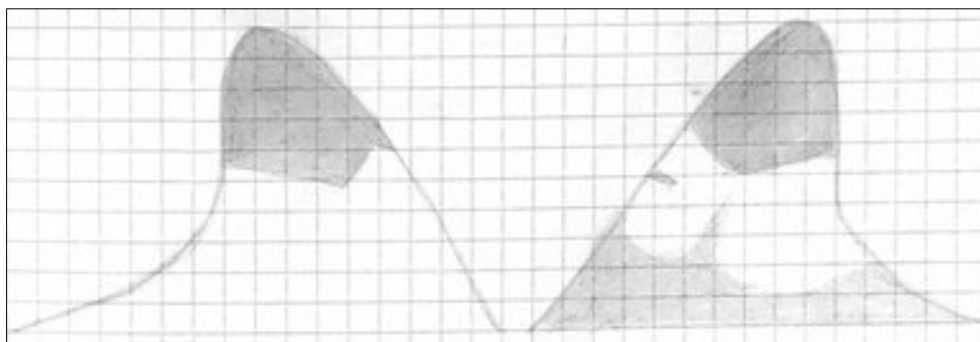

**Description:** Female; 3.5 feet, light brown. Large light dot on left side 3.5" from tail tip. Bright dots 1½" above pectoral fin and on lateral line by ventral fin right side. Pretty shark.

**Sessions attended:** 23? 118, 120, 123, 144-147, 152-155, 157, 166, 170, 171, 173, 174, 176, 179,

181, z4, 182, 183, z6, 184, 186-188, 190, 193-195, 198, 201, 203, 204, 206, 209, 210, 212, 213, 215-217, 220, 223, 225, 227-243, 245-247, 254-256, z31, 257-267, 270-272, 274

**Comments:** First shark hooked in August 04 when the finning began. Hook deformed jaw, a permanent injury though the hook was lost in a month. She apparently could not eat and disappeared in three months.

## Shark 165

nickname:

*Crystal*

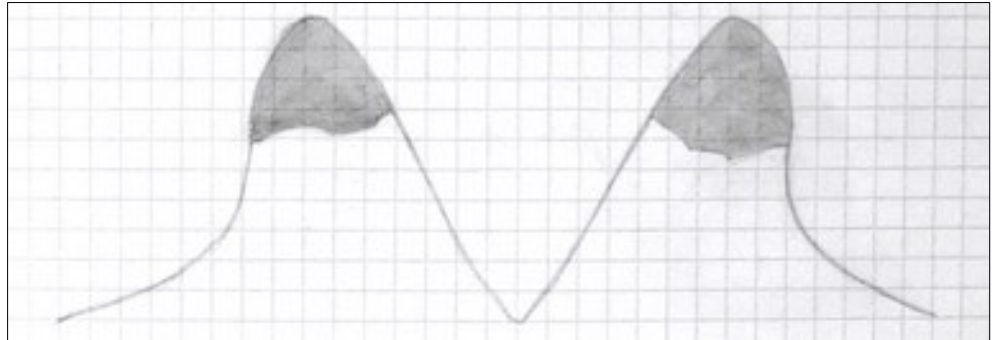

**Description:** Female; 3.5 feet, light brown. Prominent light dot on left side on the midline posterior to dorsal fin. Right side pattern similar to Diamond, with the light dot on the posterior side of the diamond bigger, fainter, and 2 inches farther back.

**Sessions attended:** 120, 123, 127, 130, 133-136, 146, 166, 167,

## Shark 166

nickname:

*Fleur de Lis*

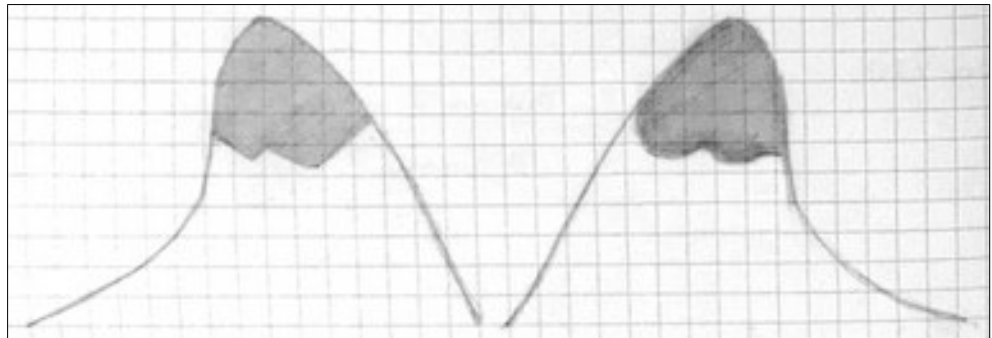

**Description:** Female; 3.5 feet, grey-brown. Light area on gill, right side.

**Sessions attended:** 125, 145, 146, 156, 157, 167, 168, 173, 179, 180, 182, 187, 190, 195, z16, 200-202, 204, 207, 209, 223, 225, 233, 234, 236, 238, 240, 241, 246, 247, B21, B24, 257, 259, 261, 266, 267-270, 279, a28, 280, 287-293, 295-299, 301-303, z54, z56, z57, z61

## Shark 167

nickname:

*Shammy*

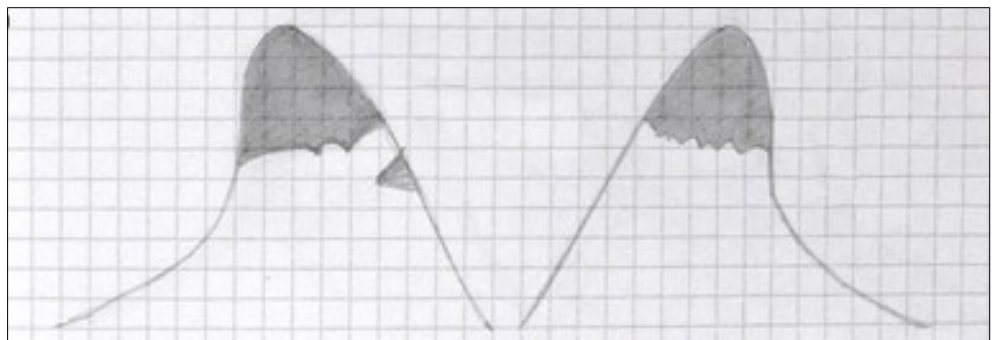

**Description:** Female; 6 feet, dark grey.

**Sessions attended:** 126, 128

### **Shark 168**

nickname:

*Splash-reversed*

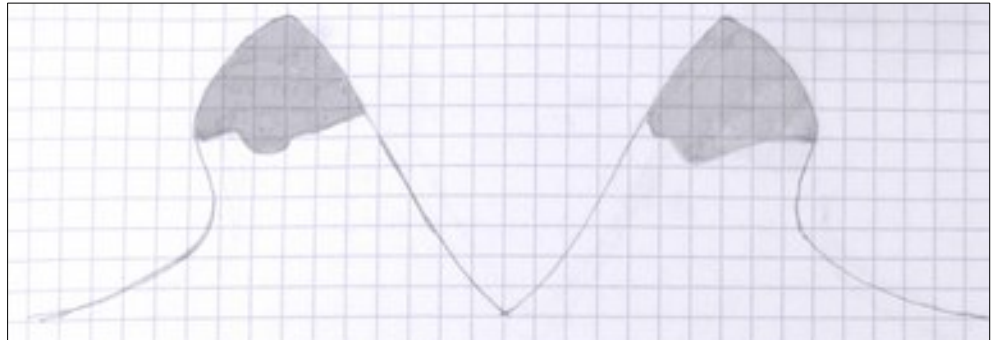

**Description:** 4 feet brown. Big, older male.

**Sessions attended:** 126, 154, 220

**Comments:** Would charge me from out of the darkness, so his fin went by super fast.

### **Shark 169**

nickname:

*Cindy*

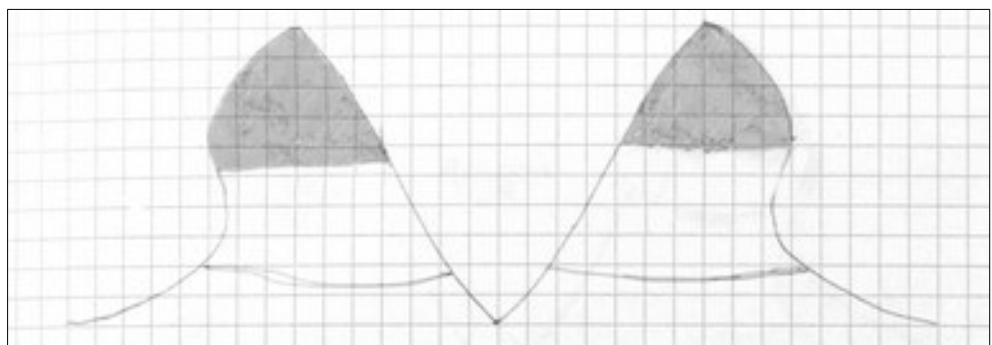

**Description:** 5 feet, grey. Not seen close up so details missing. 3" dark blotch left side.

**Sessions attended:** 126, 128, 136

**Comments:** Associated with Shammy; came together to 128. Shy shark. Pregnant.

### **Shark 170**

nickname:

*Beth*

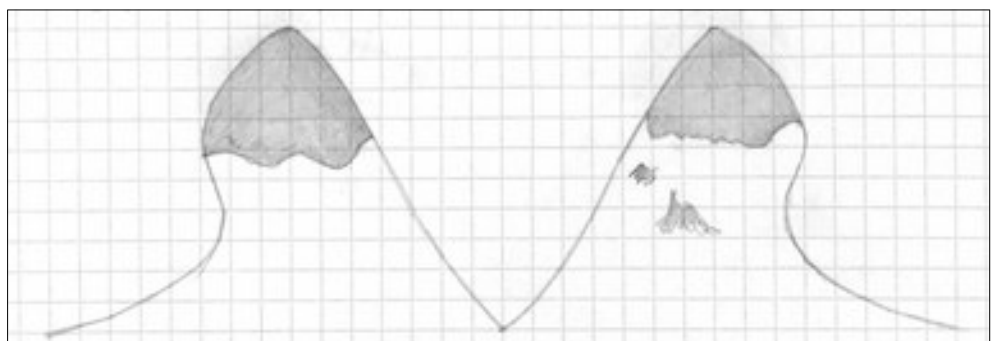

**Description:** Female; 6 feet dark grey.

**Sessions attended:** 129

## Shark 171

nickname:

*Ali*

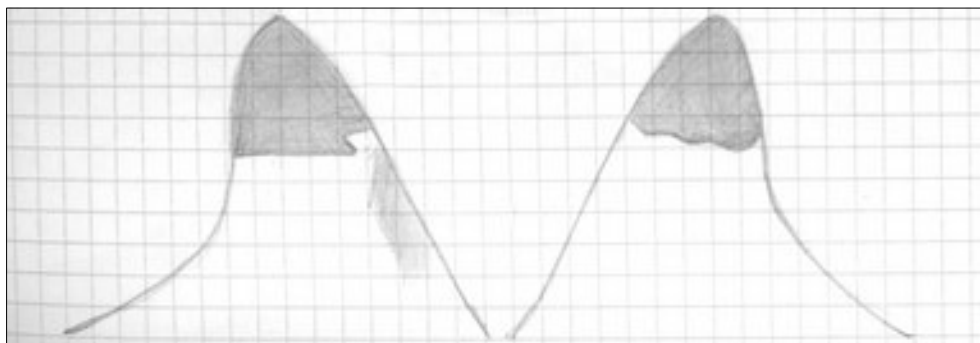

**Description:** Female; 3.5 feet, light brown when first identified. Many dots left side, black marks right side of nose. 5 dice pattern on head, left side.

**Sessions attended:** 132-135, 138-140, 143, 145, 146, 148, 150, 156, 159, 160, 164, 166-168, 170, 171, 173-176, 178-184 z7, 185-188, 190, 192, 193, 195-197, 199-217, 219, 220, 221, 223, 225-235, 239, 241, 242, 244-247, B4, a19, B9, B10, B18, B20, B21, B25-27, B32, 257, B44, 265, 270-272, 278, 287-289, 292, 293, z41, 295, z42, 298, 299, 304, 305, z55

**Comments:** Ranges Section B it seems, coming into the barrens and across too at times. Badly cut straight up centre of nose and over face at 287, about one week before, flesh missing, so profile of her nose has jog in it. Evidently a machete wound. Dark area on left side of back of head may have been stabbed several times or just grazed. Swimming normally. Arrived with Shilly (Southwest region of coral near barrens) this time, with several others from half to one km to the east in the lagoon. Following week, black line up face, couldn't see more detail, but the black area on the back of her head was smaller. Healed, flesh missing from nose, by 292. Appears now to have an association with Shilly.

## Shark 172

nickname:

*Chinook*

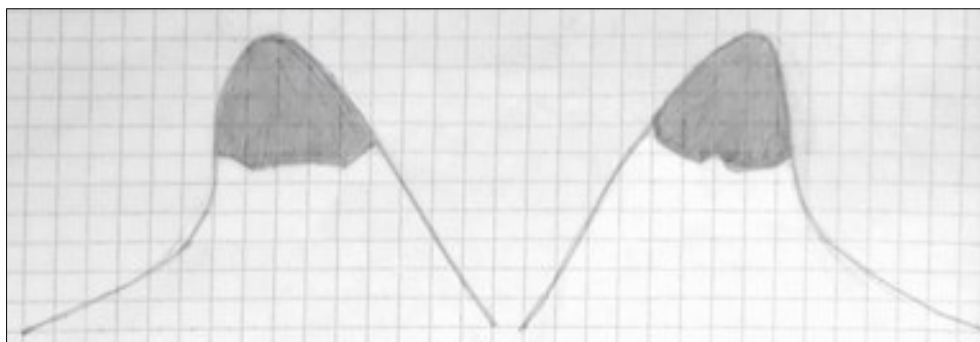

**Description:** Male juvenile, 3.5 feet, grey.

**Sessions attended:** 134, 136, 147, 166, 179, 207, 210

## Shark 173

nickname:

*Raschelle*

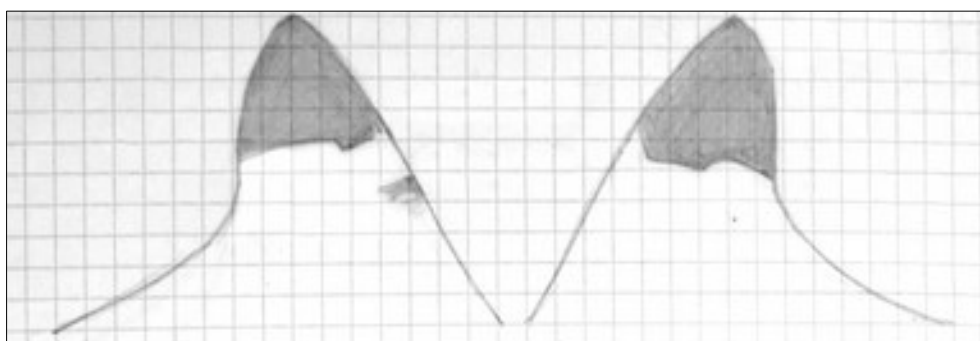



**Description:** Female; 5 feet, light brown.

**Sessions attended:** 134, 148, 154-156, 158, 159, 206, 207, 211, 219, 227, 234, B5, B6, B8, B11, B27

**Comments:** She passes right to left, so that it wasn't till 154 that I saw her other side, or could watch her. Even then, I only saw the right side at a distance. At 154, gold, mated a week before—went to another island to mate? On her return a year later, she roamed through the site in a relaxed way, so for the first time I could see the right side of her fin up close.

## Shark 174

nickname:

*Apricot*

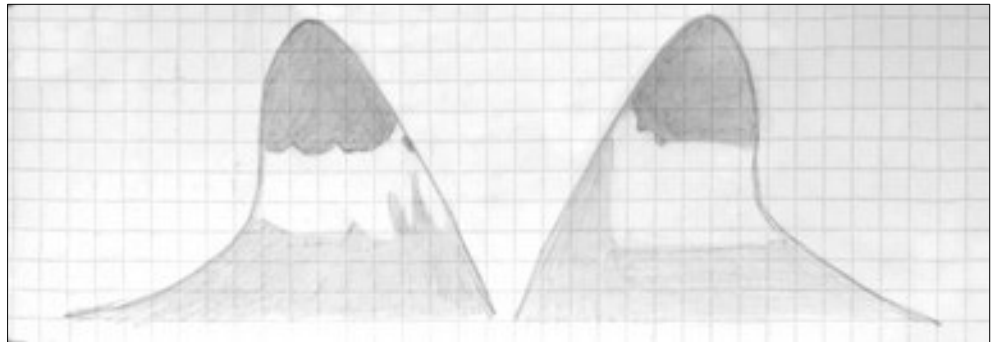

**Description:** Female; 3.5 feet, brown. Light dot on back above ventral fin left side.

**Sessions attended:** 133-136, 139, 143-147, 150-158, 160-168, 170-172, 174-181, z4, 182, 183, z6, z7, 185-190, z11, 191, z12, 192-200, y10, 201-207, 209-211, 213-216, 218-226, 228-231, 233, 234, 238-247, a19, z22, a21, z23, 251, 252, 254-256, B24, z28, B26, B27, z32, B38, 257

**Comments:** Once she discovered the feeding sessions, she would stay around as long as I was there. Followed me around coming too close for comfort at 178 like Martha. I pushed her away each time and eventually she stopped, but she still came up to my face often at the surface. Mating wounds Dec 30, 00 fresh, but no pregnancy. Growing fast 214. Mated about 3rd week Dec 01. Disappeared.

## Shark 175

nickname:

*Apricot's companion*

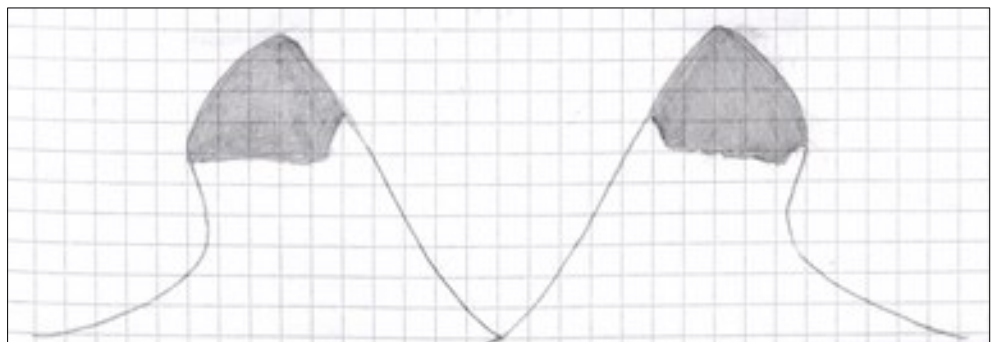

**Description:** 3.5 feet. Pale grey shark, right side scars behind gills.

**Sessions attended:** 133

## Shark 176

nickname:

*Marley*

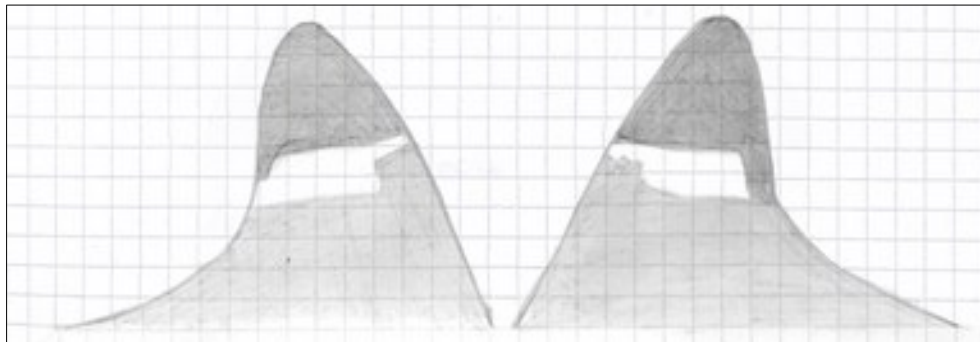

**Description:** Male; 4 feet, very dark grey.

**Sessions attended:** 136, 138, 154

## Shark 177

nickname:

*Marley's companion*

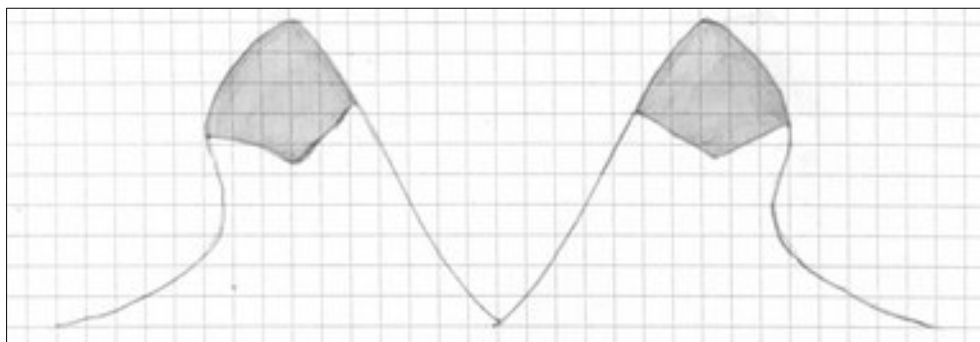

**Description:** Male; 4 feet. Dark brown shark—associated with Marley.

**Sessions attended:** 136

## Shark 178

nickname:

*Keeta*

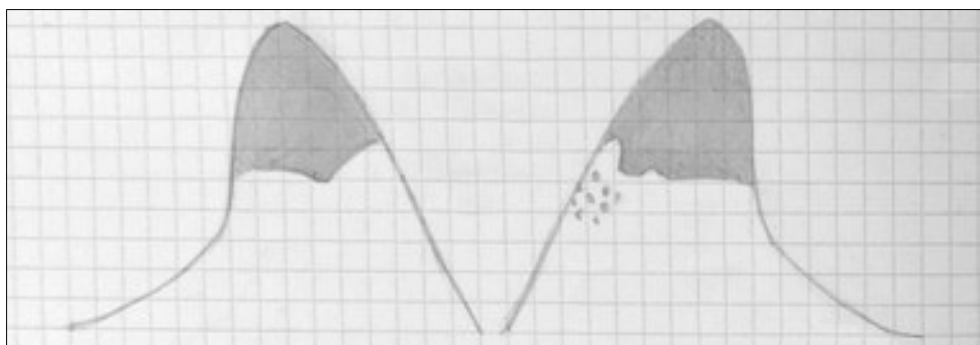

**Description:** 6 feet; a huge, heavy set shark. Dark chocolate brown.

**Sessions attended:** 136, 173, 192, 201, 203, 206, 209, 213, 227, 228, 230, 232, 233, 237, 241, 242, 243, 245-247, O3, 251, 252, B43, 271, 272, 274, 279, 281-283, 286, 288-290, 292, 295-298, 300-303

**Comments:** Pregnant at 136. Came at times with Nessie. Came to 192 with Eclipse and Hurricane. Pregnant in 2001. Had pups by 203 (October 16<sup>th</sup>). Pregnant in 2004, had pups by November 20<sup>th</sup>.

## Shark 179

nickname:

*Shenandoah*

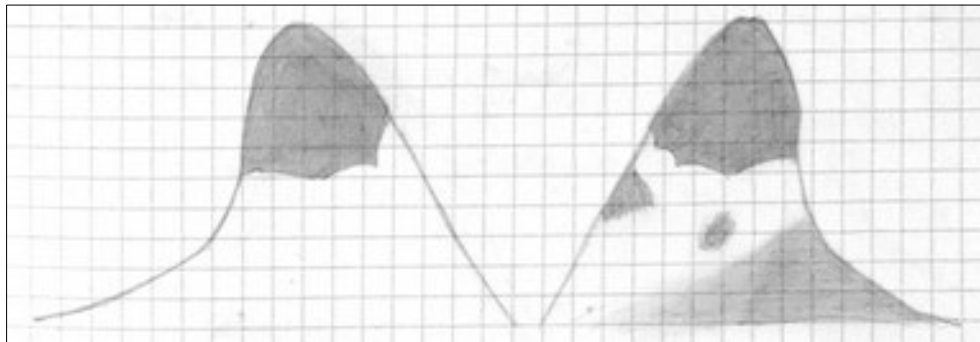

**Description:** Female; 6 feet, grey-brown.

**Sessions attended:** 138, 215, P1, P2, P3, P5

**Comments:** Home range in Papetoai lagoon, extreme east side, providing first evidence that sharks do, if very occasionally, move through neighbouring lagoons. No other sharks from that lagoon were ever observed at a session in the main study area. Shenandoah came to Section A on 03/11/00, and 04/12/01. On her first meeting, she swam slowly up to my face, nearly touching me, time after time. Her behaviour was always strange, even in her own range, where she would cruise behind me, scarcely in visual range, for long periods, then suddenly make a very close approach straight on.

## Shark 181

nickname:

*Loretta*

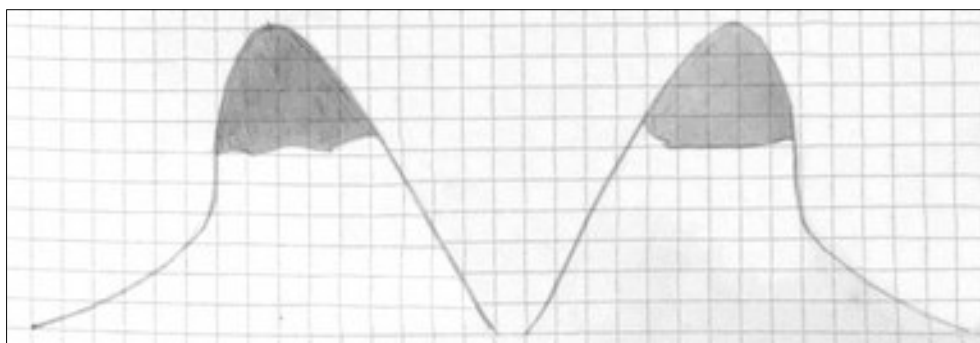

**Description:** Female; 6 feet.

**Sessions attended:** 139, 257

**Comments:** Drawings rough impression; terrible conditions.

## Shark 182

nickname:

*Eden*

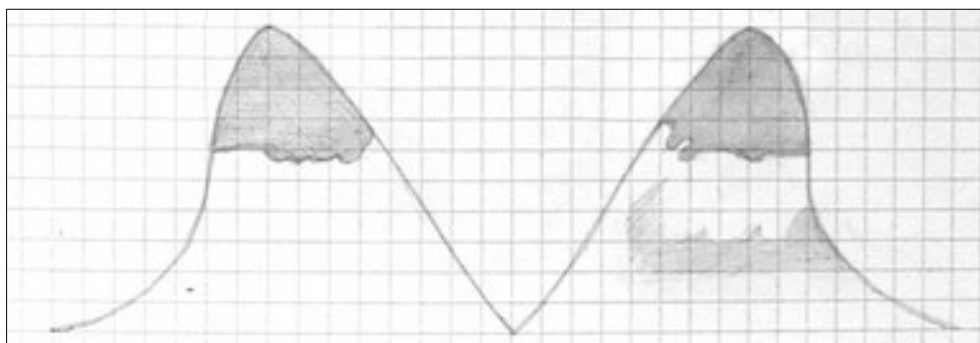

**Description:** Female; 3 feet when identified, grey.

**Sessions attended:** 139, 164, 165, 167, 168, 173, 174, 175, 176, 178-181, z4, 182-184, z7, 185, 186, z9, 187-190, z11, 192-196, 198-206, 209, 211, 213-216, 227, 229, 230, 232-238, 240- 244, 246, 247, a18-21, 251, 253-256, B24, z28-30, z33, z34, B32, B33, B36, 259, 264, 265, 267, 269, 270, 272-274, 278, a27, 281, a28, 283, 284, a29, a30, 286-289, z38, 290, z40, 292, 293, z41, 295-299, a36, 300-303, z50, 304, z55, z56, z57, z58, z59, z60, z61

**Comments:** Grew to be one of the big females of the barrens-to-border region after the deaths of the original residents. Hooked at z40; stabbed in mid right side at 299, November 13<sup>th</sup>—a two inch, fresh, vertical stab wound. And she's so shy. She had her pups immediately after that, prior to November 17<sup>th</sup>, when the knife wound was just beginning to grey around the edges. It was very early for her though I was not sure the precise time she mated, and have no doubt that the loss of her pups was due to this injury.. Knife wound black on November 20<sup>th</sup>. Big hook in mouth z55, June 3rd, 05.

## Shark 183

nickname:

*Fagan*

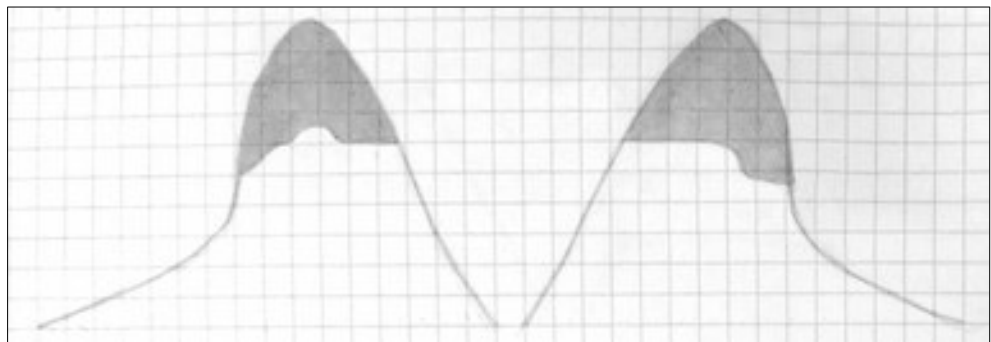

**Description:** Male; 4 feet.

**Sessions attended:** 141, 147.

## Shark 184

nickname:

*Rowan*

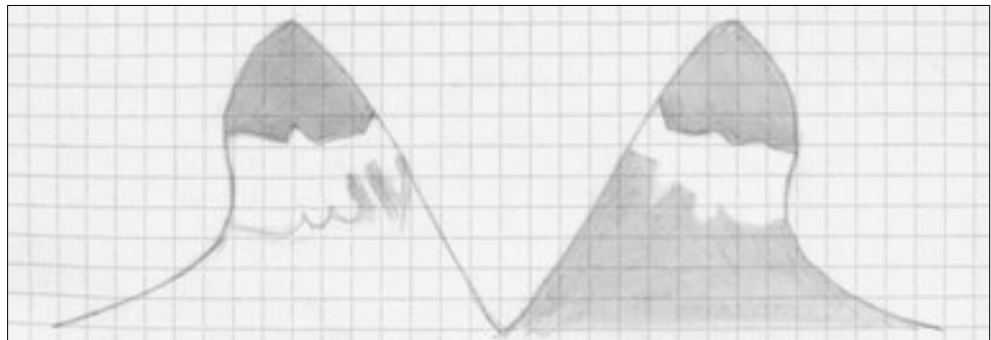

**Description:** Female; 5.5 feet, dark grey brown

**Sessions attended:** C6, B29

**Comments:** September 10th, had fish-hook stuck in back; pregnant

## Shark 185

nickname:

*Cochise*

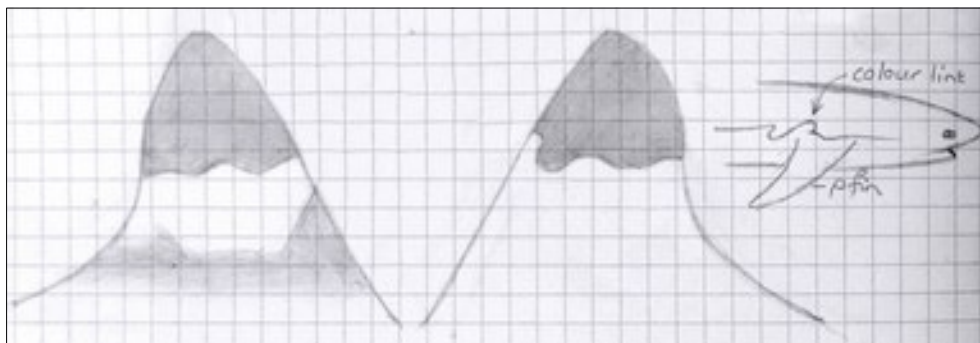

**Description:** Male; 4 feet, grey brown.

**Sessions attended:** 142, C1, C5, 208, 227, C11, B8, z27, B22, z34, B33-36

**Comments:** In Section A on November 23, 00 and November 4, 01.

## Shark 186

nickname:

*Fermat*

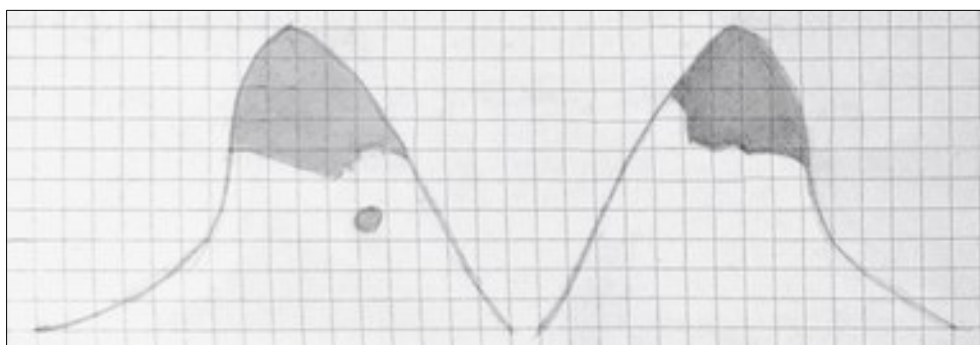

**Description:** Male; 3.5 feet, grey brown.

**Sessions attended:** 142, 154, 209, 211, 213, 214, 235-239

**Comments:** In Section A on November 23, 00 and November 4, 01.

## Shark 187

nickname:

*Breezy*

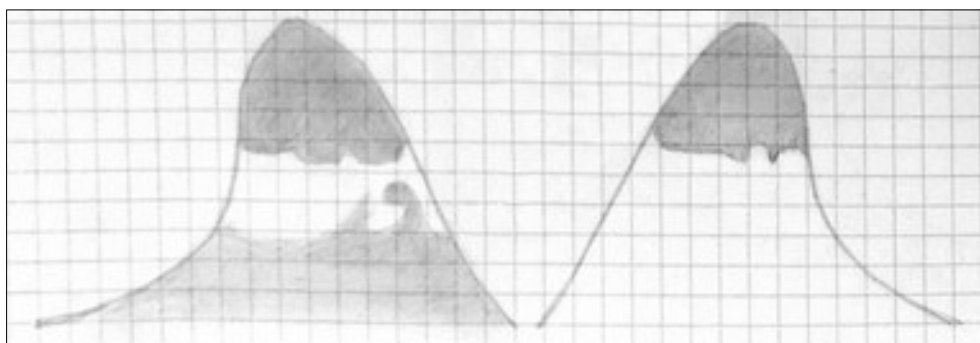

**Description:** Male; small juvenile when identified, 3 feet, bronze.

**Sessions attended:** 143-145, 150, 154, 155, 157, 162, 164, 166, 174, 176, B1, 180, z3, 181, z4, 182, 183, 184-190, 193, 195, z13, 196-204, 206-216, 219, 220, 222, 223, 225, 227, 229-236, 238-242, 244-247, B7-9, z24, B10, 251-254, B16, 255, B17, B18, B20-27, z32, B28, B29, z33, B31, z34, B32, z35, B35-38, 257, B39-44, 262, 265, 266, 268, 270, 271, 274, 281, 283, a29, 285, a30, 287-289, z39, 290, 291, z40, 292, 293, z41, 295-300, 303, 304, z54, z55, z57, z58, z59

**Comments:** Coming at sunset in June, July, 2000. 5:15 July 28th, (sunset, 5:45). At 193; he



came at 5:57. 199: 5:16, 200: 5:48, 201: 5:27, 202: waiting on my arrival at 5:15, at 203: 5:57. At 206 small claspers, 2 inches at 234, March 1st, 02. As he got older, and everyone else died, he was one of the few who would bug me for food when he came after it was gone. Strange that having come to the regular sessions while he was growing up, that he switched to Site B easily, but rarely returned to Site A for a long time. Another impression that males roam more freely, farther.

### **Shark 188**

nickname:

*Antha*

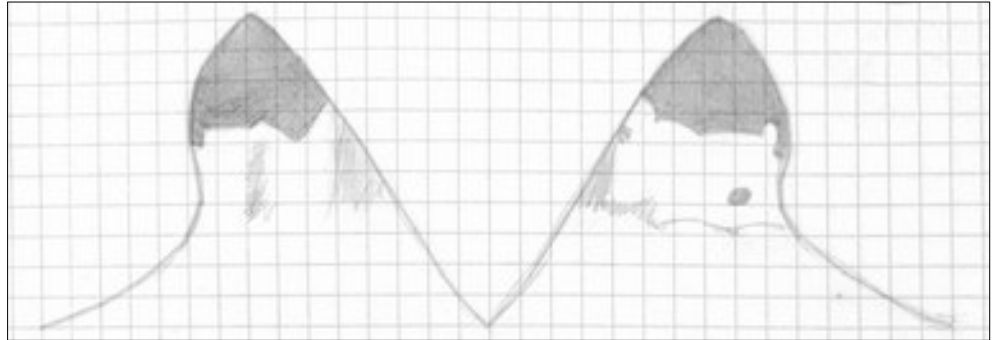

**Description:** Female; 6 feet, grey.

**Sessions attended:** C6

### **Shark 189**

nickname:

*Sardar*

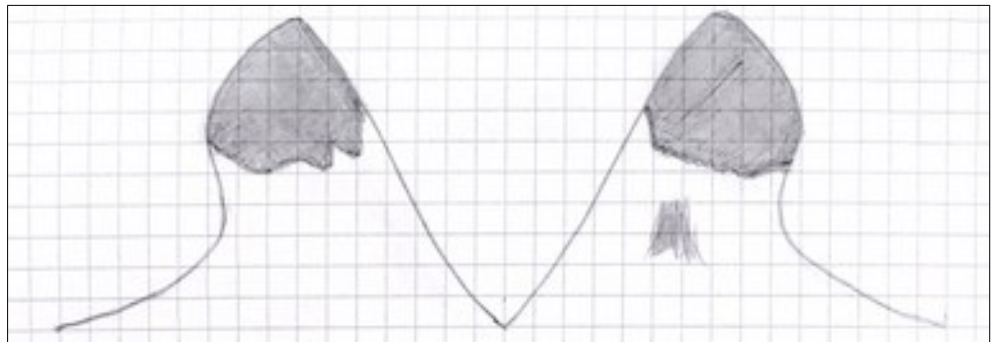

**Description:** Male; 4 feet, grey. Missing tail tip.

**Sessions attended:** 146

### **Shark 190**

nickname:

*Babalu*

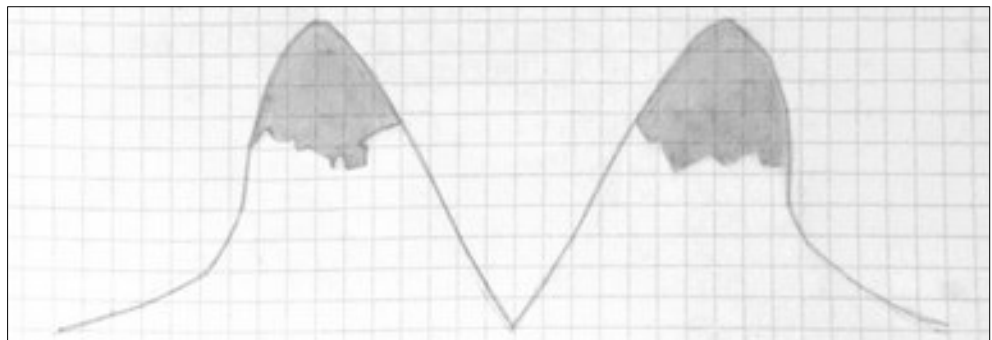

**Description:** Male; 4 feet, grey. Missing tail tip.

**Sessions attended:** 146

## Shark 191

nickname:

*Shilly*

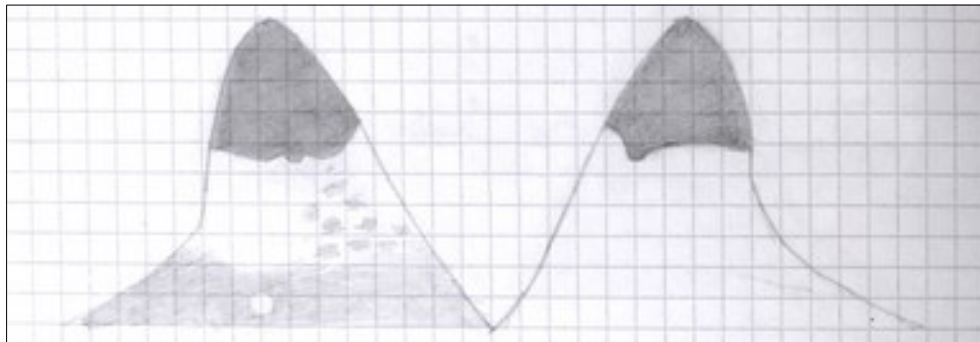

**Description:** Female; 3 feet, bronze.

**Sessions attended:** 147, 152, 161, 164, 166, 167, 171, 173-175, 177, 180, z3, z4, y6, 182, z6, 184-189, 194, 195, z13, 196, z14, 197, 198, y10, z17, 201, 202, y11, 203, z18, 206, 208-210, 212-218, 220, 221, 224-227, 229, 232, 233, 234, 236, 238-240, 242, 243, 245, 247, B8, z23, Ba3, B10, B11, 252, 254, 255, B19-21, 256, B22-27, z32, B28-30, B34, B36, B38, 257, 260, B40, B41, 261, B44, 263, 265-267, 271, 272, 280, 281, a28, 287-289, z39, 291, z40, 292, z41, 295, z42, 296, 298, 299, 302, z48, z49, 304, 305, z53, z54, z55, z56, z57, z58, z59, z60

**Comments:** Would follow me around, usually beyond visual range, when I was in the study area, starting from the time she met me and continuing after she was an adult. Ranged in the eastern part of Section A but was willing to go far when with me.

## Shark 192

nickname:

*Danté*

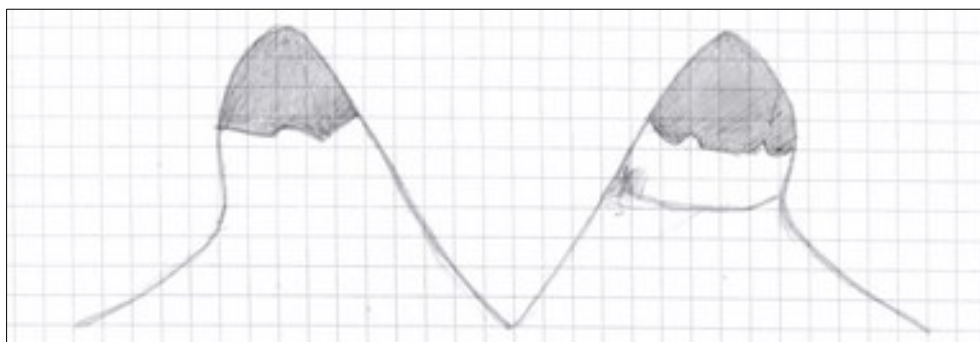

**Description:** Male; 4 feet, grey—big, older male.

**Sessions attended:** C6, C11, B6, B24, B35, B41, B43

## Shark 193

nickname:

*Antigone*

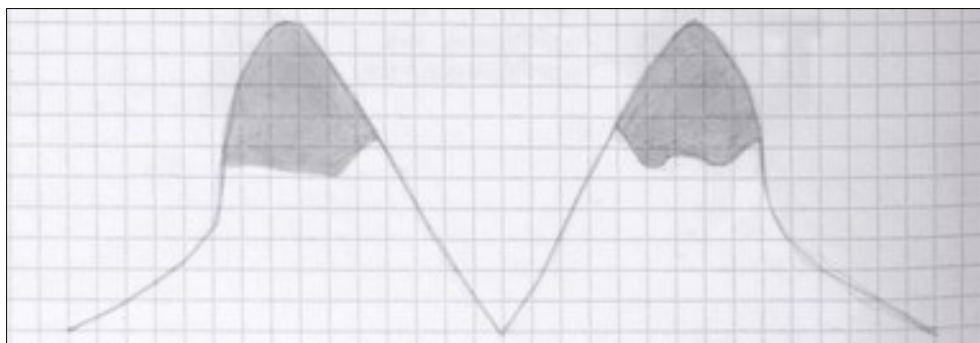

**Description:** Male; 4 feet, pale gold—beautiful immaculate shark, well proportioned.

**Sessions attended:** 148, 150, 162, 192, 222, 225, 236, 269, 299, z55

## Shark 194

nickname:

*Cajun*

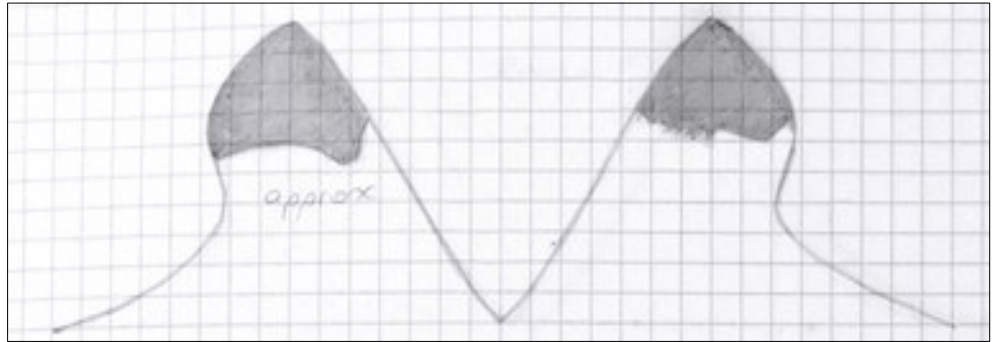

**Description:** Male; 4 feet. Tip line on left side blurred front half.

**Sessions attended:** 148, 204, 215

## Shark 195

nickname:

*Evie*

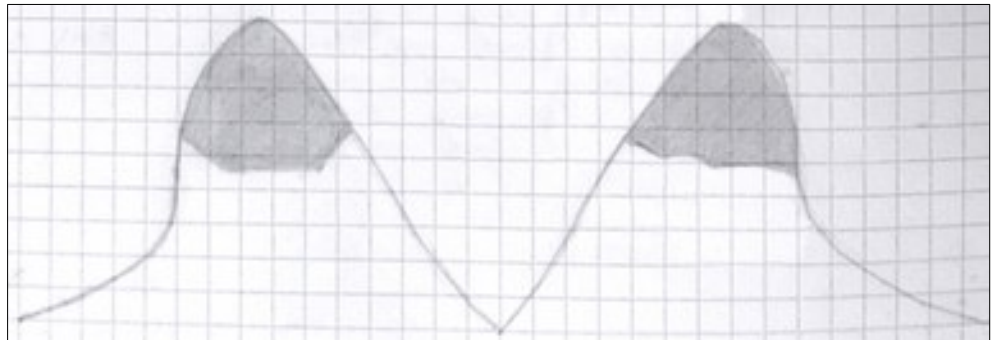

**Description:** Female; 5 feet, bronze.

**Sessions attended:** 148, 149, B9, y9

## Shark 196

nickname:

*Nell*

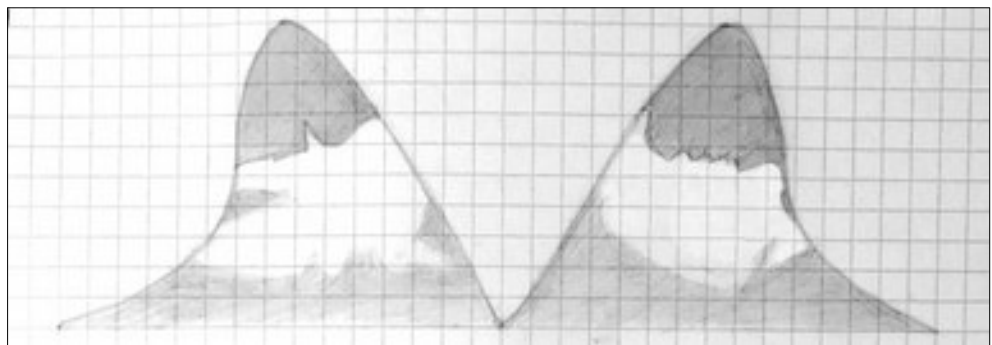

**Description:** Female; 6 feet, dark grey. Large dark mark in middle of head.

**Sessions attended:** 150

**Comments:** Wild looking shark, a lot like Lillith for general look. Clearly elderly. Mating wounds 10 to 14 days old. Mated December 15 to 20st approximately.

## Shark 197

nickname:

*Gwyn*

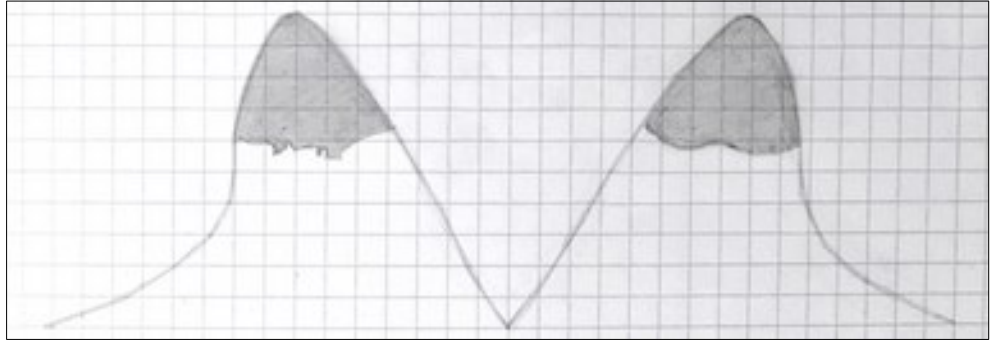

**Description:** Female, 6 feet medium grey.

**Sessions attended:** 152

**Comments:** mated approx 1st week January, 01.

## Shark 198

nickname:

*Rosetta*

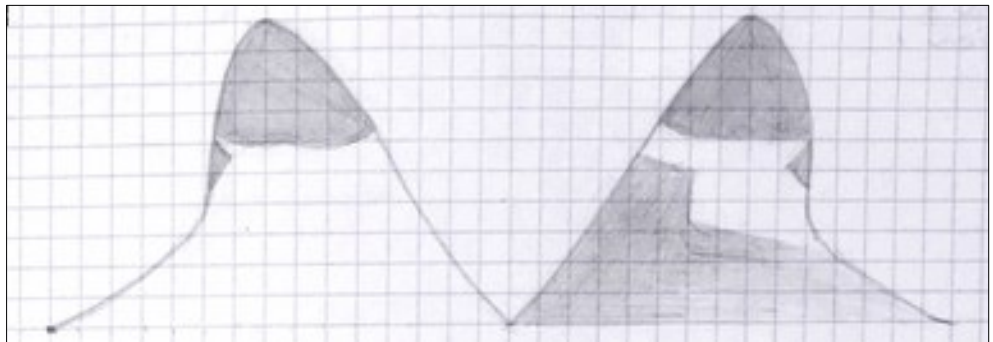

**Description:** Female; 6 foot, dark shark.

**Sessions attended:** 152, 167

## Shark 199

nickname:

*Laddy*

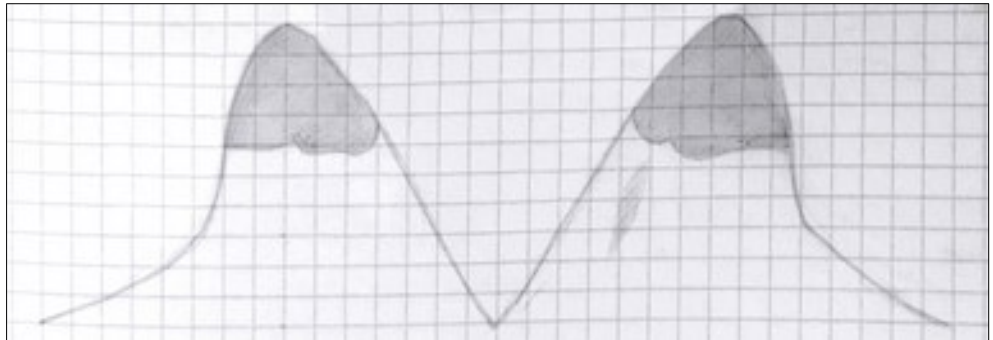

**Description:** Male; 4 feet, brown.

**Sessions attended:** 153-155, 160

## Shark 200

nickname:

*Trishy*

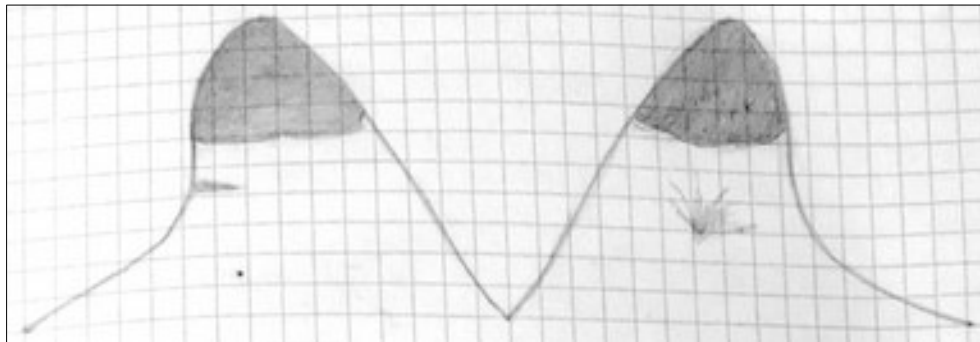

**Description:** Female juvenile; 3.5 feet, grey.

**Sessions attended:** 153, 155, 156, 163, 164, 166, 169, 177, 180, 181, z4, 182, 185, 194, 203

**Comments:** Light dot mid side both sides. Tip line looks like a smooth arc both sides from a distance.

## Shark 201

nickname:

*Brandy*

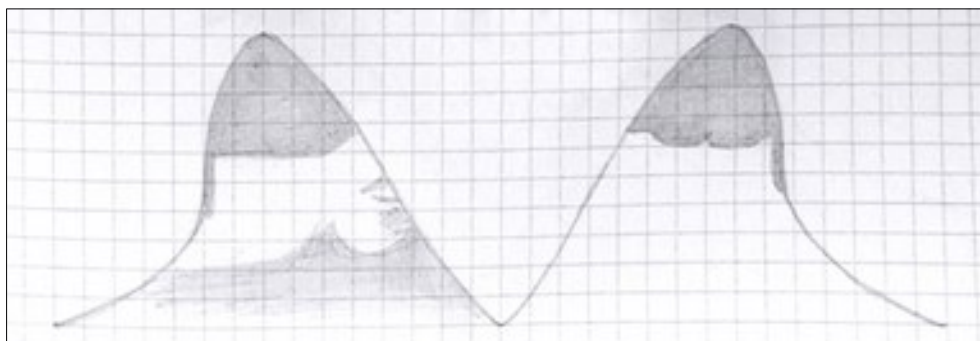

**Description:** Female; 3 feet, very dark bronze.

**Sessions attended:** 154, 165-181, z4, y6, 182, 183, 185-187, z9, 188-195, z14, 197-213, 215, 216, 218-247, 253-255, z28, z32, 257-261, 263, 265-270, 272, 273, 277-284, a29, 285, 286-293, 295, 298-300, a38, z51, 305, z53, z54, z57. Z60

## Shark 202

nickname:

*Ann Bolyann*

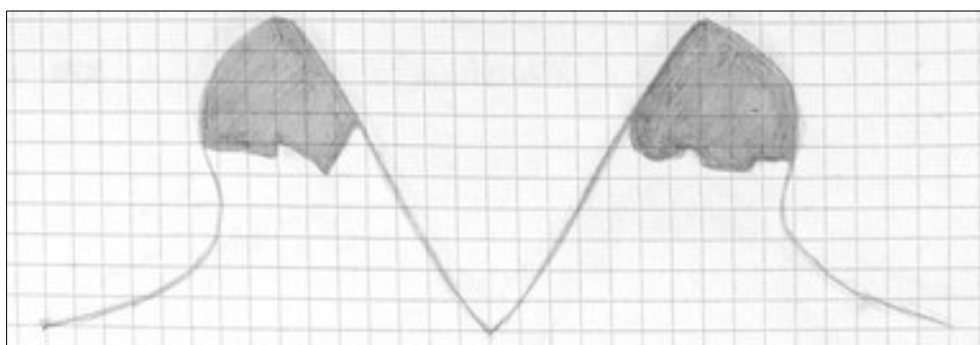

**Description:** Female; 5.5 feet, dark grey.

**Sessions attended:** 154, 198, 202, 210, B5, B19, B24, z28, B27, B37, B39, B40, B43, B44, 271, 272, 282, 285, 287, 289-292, z41, 295, 296, 298, 300-303, z58, z59, z60, z61

**Comments:** 154: mated in last 2 days, just a few cuts. 198: very pregnant. 202—still pregnant. 210, November 15th, 01 had birthed. Had birthed the following year by October



26, 2002, B24. Sessions 287 to 291, she was coming in with Section B sharks at the end of each session, such as Jessica, Marten, and Cotlet, suggesting that she was spending her time in the barrens and coral of Section B, at least at that time.

### Shark 203

nickname:

*Hurricane*

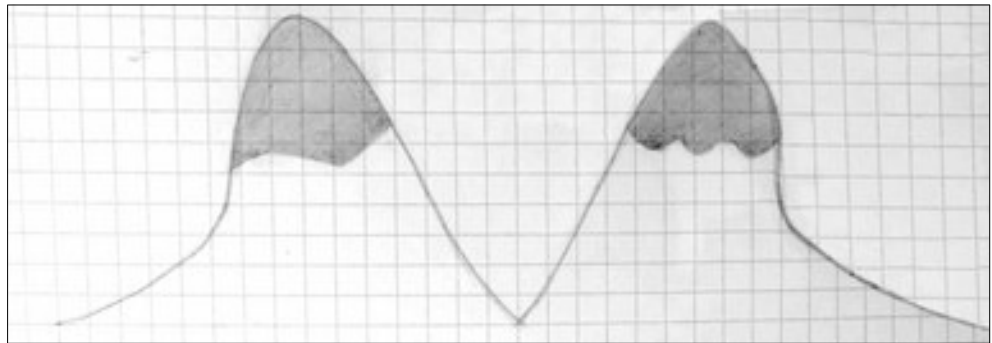

**Description:** Female; 6 feet, dark grey

**Sessions attended:** 154, 178, z4, 192, C7, C9, 257, B39, B44, 266, 267, 269, 272, 274, 279, 280, 282, 285, 287-292, 296, 298-303, 305, z54

**Comments:** Travelled with Ann Bolynn very often; they were together when I met them. In barrens on June 25th, a.m. Pregnant in 01. In Section C on September 30th, while Ann Bolynn was in Section A showing that these companions also travelled separately. Appeared together in March 04, with Odyssey and Concorde as well. During their later visits they would always circle me on arrival one after the other.

### Shark 204

nickname:

*Ferth*

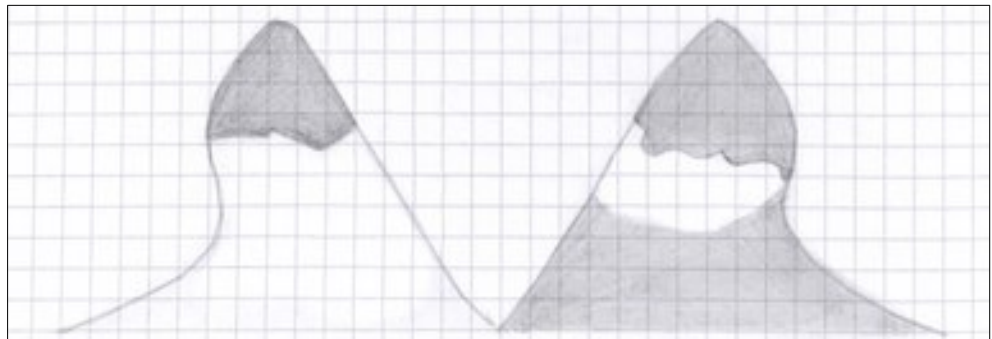

**Description:** Male; 4 feet, grey.

**Sessions attended:** C6

### Shark 205

nickname:

*Pip*

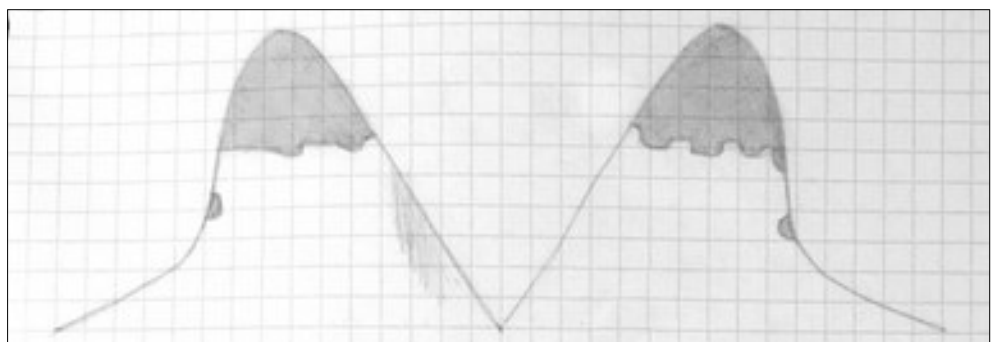

**Description:** Female; 3.5 feet, grey when first identified.

**Sessions attended:** 154-156, 164, 165, 167, 173, 179-183, 185, 190, 193, 198, 200-206, 209, 210, 212-219, 223-225, 227, 230-236, 238, 240-244, 246, 247, z24, B10, B11, 251, 252, 254, 256, B23, B24, B26, B27, B32-35, B37-40, B42-45, 264-267, 269-272, 274, 275, 278-281, a28, 285, a30, a31, 287-289, z40, 292, 293, z41, 295, z42, 296, 297, 299, 301-304, z52, z53, z54, z56, z57, z58, z59, z61

## Shark 206

nickname:

*Blade*

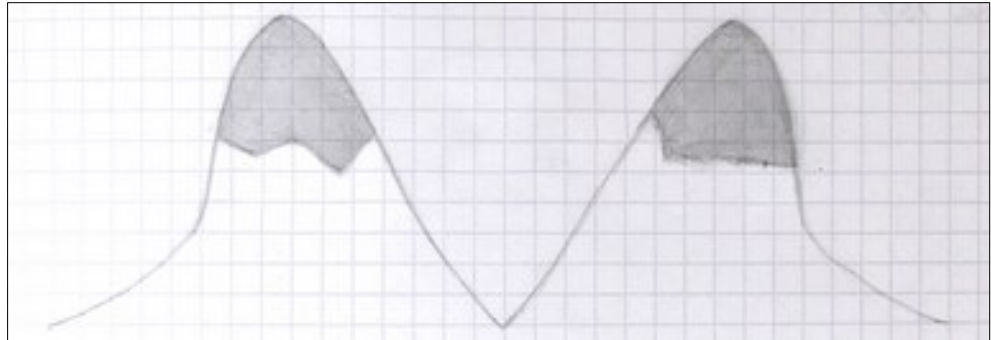

**Description:** Male; 4 feet, brown.

**Sessions attended:** 154, z2, y7, 213, 239, B29, 267, 272, 282, 283, 296, 298, 300, z54

## Shark 207

nickname:

*Simmaron*

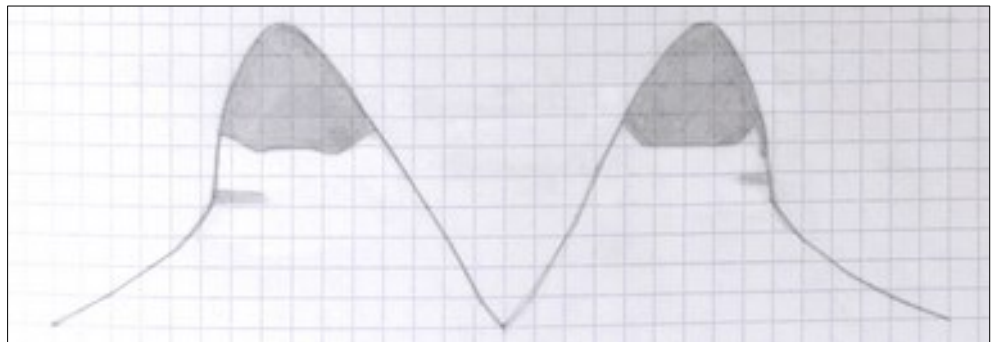

**Description:** Female juvenile; 3.5 feet, grey.

**Sessions attended:** 54, 160, 164, 166-168, 171, 174-179, y2 181-183, z7, 187, 190, 192, 193, 195, 198-211, 213-220, 224, 226, 227, 228, 230-235, 238-240, 242. 244-247, B9, B10, 253-255, B19, 256, B24, B27, B29, B31, B35-39, 260, B40, B42, 262, 263, 265-267, 269, 270-272, 274, 275, 281-286, 288-292, z41, 295-301, 303, 304, z56, z57, z58, z59, z60, z61

**Comments:** Crosses the site left to right each time, doesn't tarry or return, until ~175 Simmaron became an aggressive shark, with fast, close frontal approaches whenever she saw me, in sections B or A. Young adult in March 04.

## Shark 208

nickname:

*Ramone*

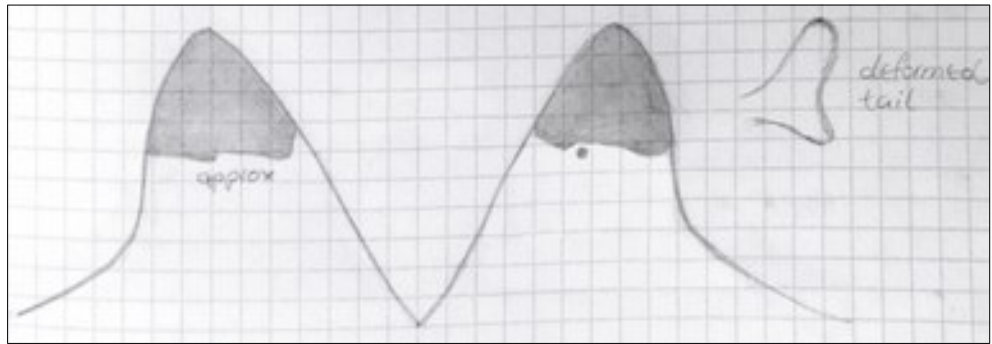

**Description:** Male; 4.5 feet, pale gold.

**Sessions attended:** 155

**Comments:** Tail tip rounded low down, edged with black.

## Shark 209

nickname:

*Darcy*

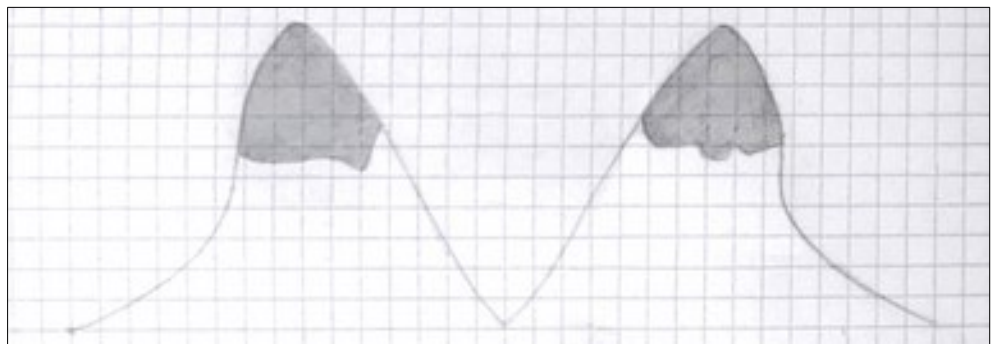

**Description:** Male; 4 feet, brown.

**Sessions attended:** 157, 198, 204, 206, 207, 209-212, 214, 220, 221, 223, 224, 227, 230-243, 245-247, a19, B9, B10, z30, B30, B31, 257-260

**Comments:** Coming just at sunset 220 to 224. Odd that he became a regular so suddenly, stayed for so long, then disappeared.

## Shark 210

nickname:

*Mystery*

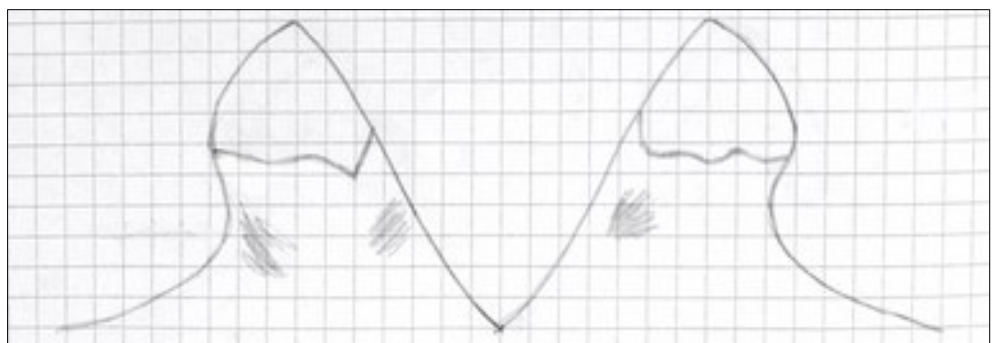

**Description:** Female; 5.5 feet, brown.

**Sessions attended:** 157, 159, 165

## Shark 211

nickname:

*Celeste*

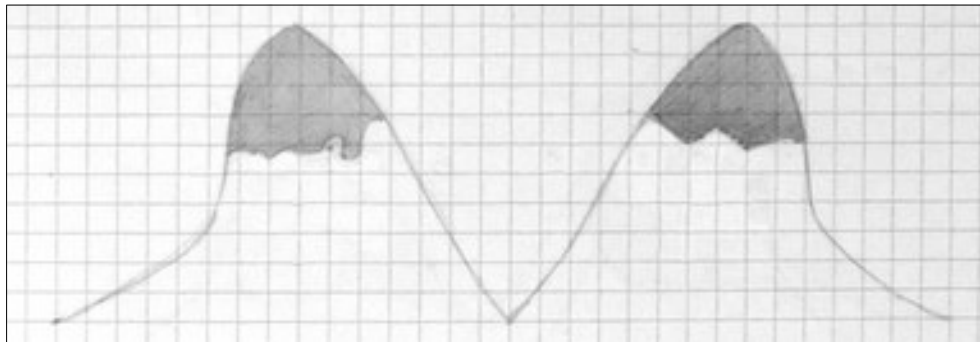

**Description:** Female; 6 feet, light grey. Very big, heavy-set shark.

**Sessions attended:** 157, 158, 164, 171

**Comments:** Named after Galileo's daughter. Came with Arcangela, 158, 164, 171.

## Shark 212

nickname:

*Jen*

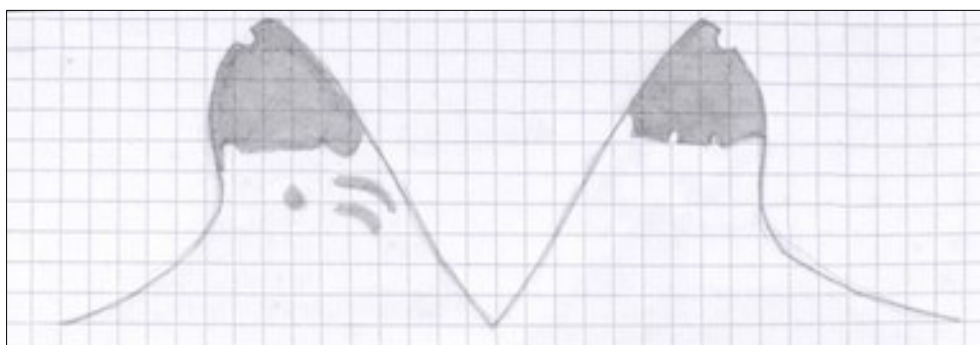

**Description:** Female; 5 feet, grey.

**Sessions attended:** C6, C7

**Comments:** pregnant

## Shark 213

nickname:

*Innisfree*

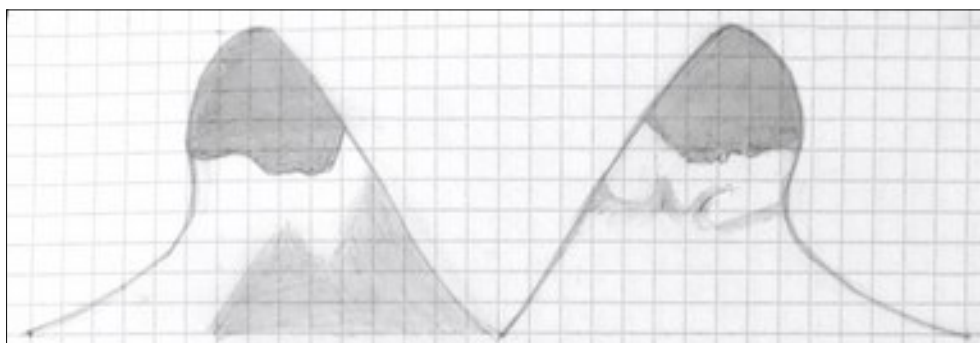

**Description:** Female; 6 feet, grey—a very big shark.

**Sessions attended:** C6, E2, E4

**Comments:** At E4 she suddenly began charging me fast, repeatedly, followed by the others present, with more and more shooting into visual range from beyond! Lacking a kayak to escape to, I took off for shore and did not return. She ranges the eastern part of the lagoon and was never seen at the Section A sessions.

## Shark 214

nickname:

*Topnotch*

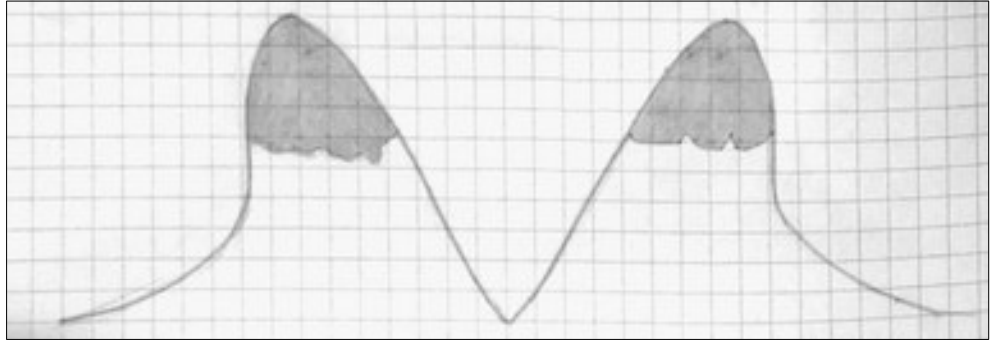

**Description:** Male; 3.5 feet, grey.

**Sessions attended:** 163, 164, B5

**Comments:** Seen him before long ago in Section A.

## Shark 215

nickname:

*Tod*

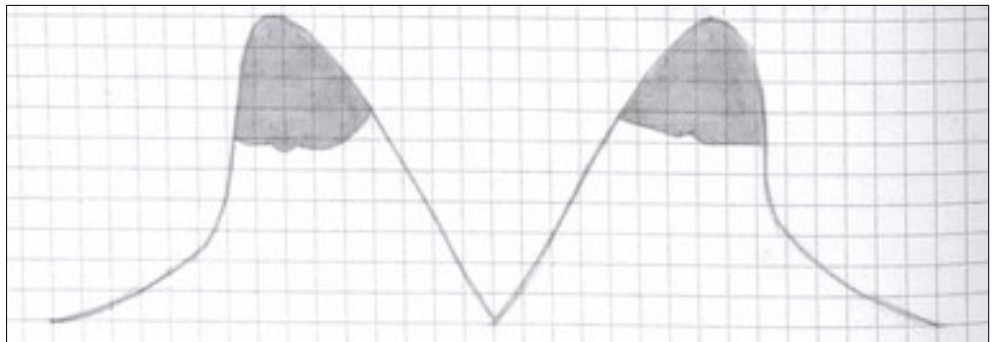

**Description:** Male; 4 feet, grey brown.

**Sessions attended:** 164, 167, 168

## Shark 216

nickname:

*Abraxus*

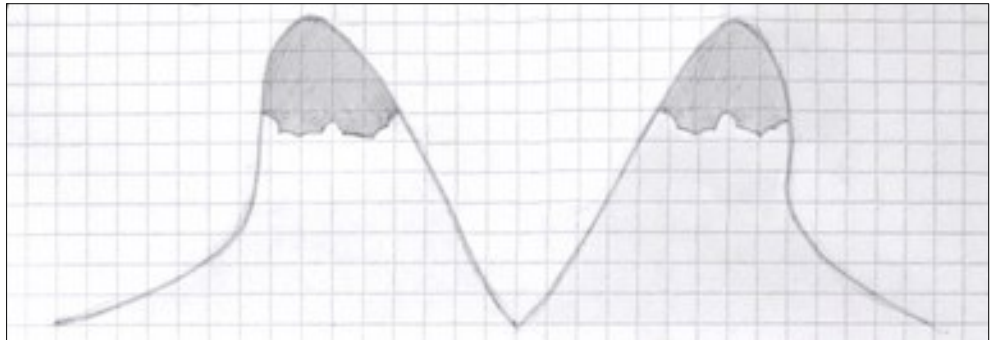

**Description:** Male; 4 feet, pale bronze or gold. Dorsal fins both sides elaborate Ws, very unusual.

**Sessions attended:** 164, z32, 299



## Shark 217

nickname:

*Pontiac-too*

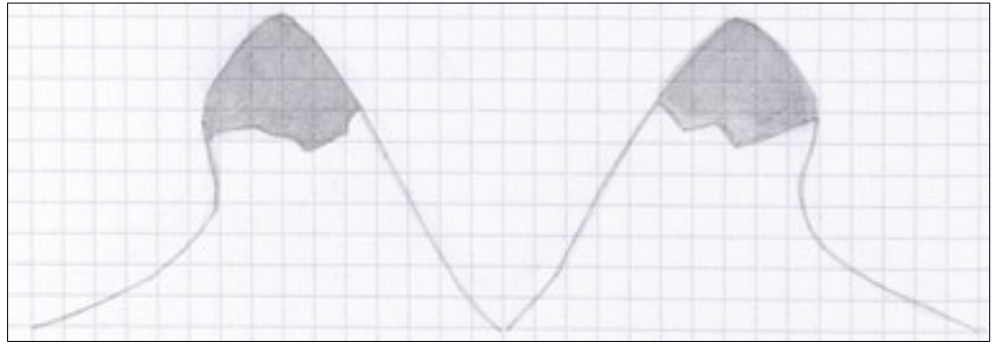

**Description:** Male; 4 feet.

**Sessions attended:** 164

## Shark 218

Nickname:

*Beauty*

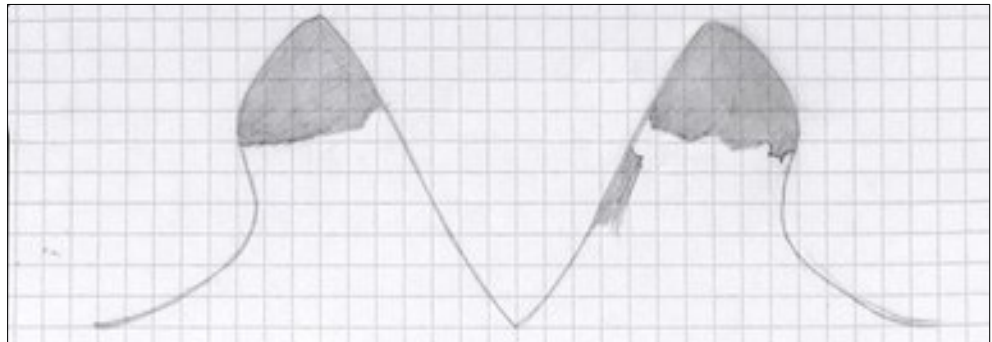

**Description:** Female; 5 feet, dark charcoal.

**Sessions attended:** 164

## Shark 219

nickname:

*Odyssey*

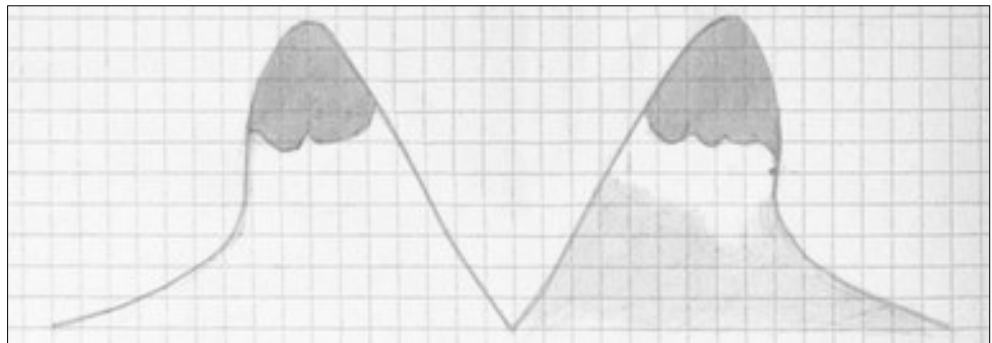

**Description:** Female; 6 feet, grey. The anterior gill-cover on the right side is cut off, leaving a hole; the same the following year—a permanent scar. Association with Clementine, confirmed in 2002, 2003, 2004, for the two were very rare visitors.

**Sessions attended:** 164, 167, 168, 230, 235, 238, 242, 243, 245, 257, a28, 285

## Shark 220

nickname:

*Clementine*

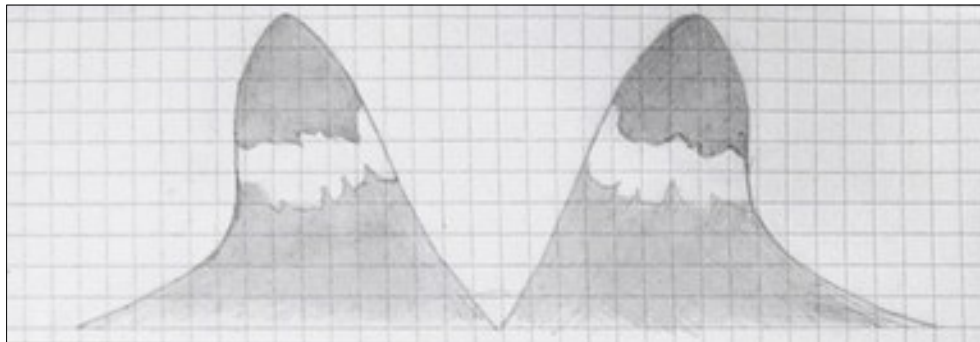

**Description:** Female; 6 feet, grey.

**Sessions attended:** 164, 166, 167, 240, 242, 246, 257, 285

**Comments:** Dark mark on left side a few inches in front of and below dorsal fin when identified at 164. May not be permanent. Healed to black line by 167. At 240, the right pectoral fin is bent so sharply that it curves under her body. It is still like that a year later, May 4th, 2003. She and Odyssey come to the area just once per year.

## Shark 221

nickname:

*Algebra*

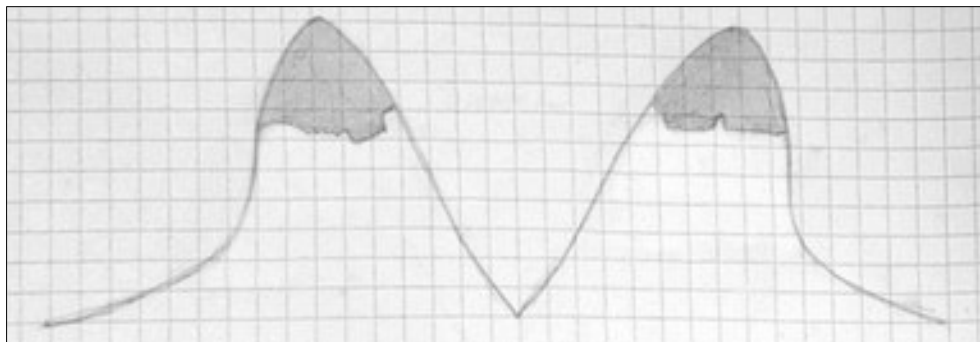

**Description:** Female; 6 feet, grey-brown.

**Sessions attended:** 166, B36

## Shark 222

nickname:

*Charm*

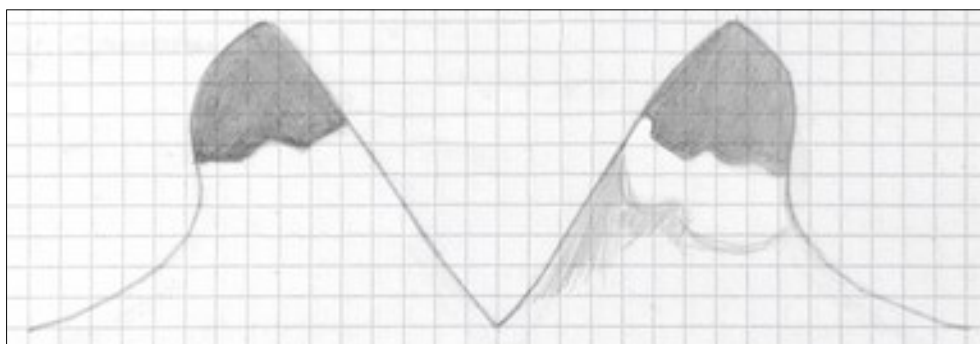

**Description:** Female; 5.5 feet.

**Sessions attended:** 172, C6, C8

**Comments:** Dark smudge on right side; may not be permanent. Pregnant in 2001.

## Shark 223

nickname:

*Stornoway*

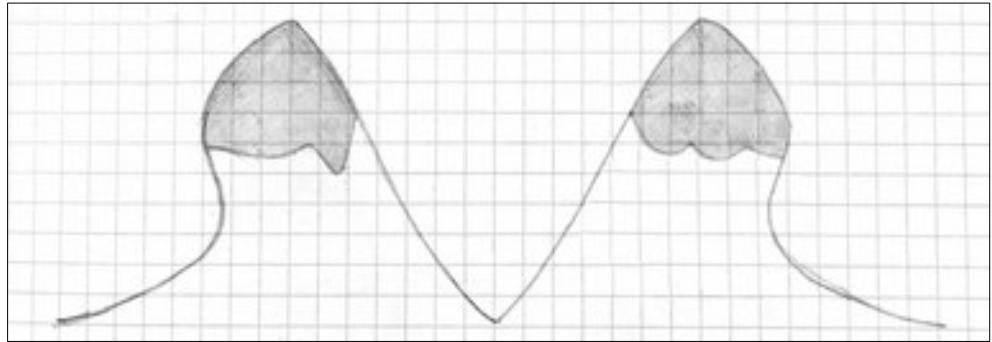

**Description:** Female; 6 feet, grey.

**Sessions attended:** P6

## Shark 224

nickname:

*Madelena*

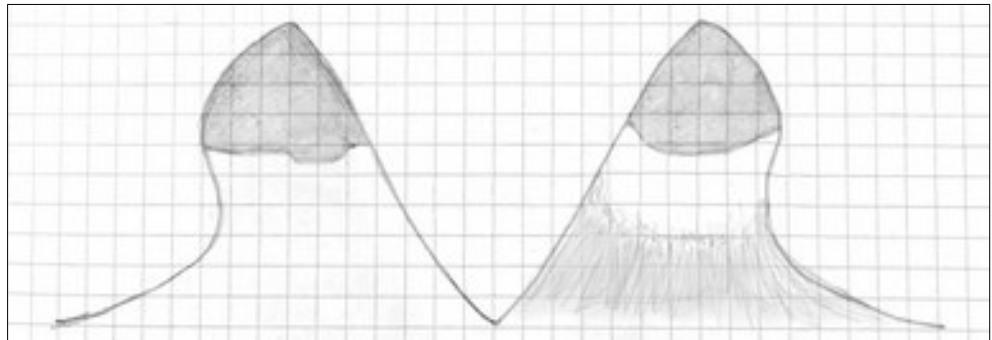

**Description:** Female; 5.5 feet.

**Sessions attended:** P6

**Comments:** So like Madeline of Section A that it took some time to be sure it was a different shark. This was the only true look-alike I encountered.

## Shark 225

nickname:

*Nutmeg*

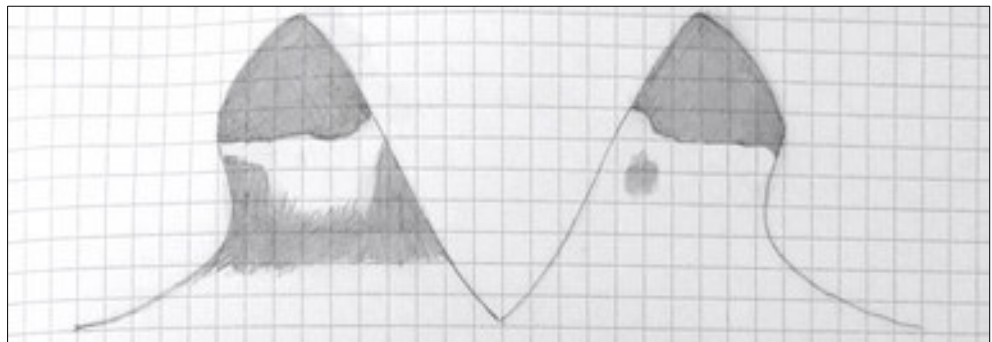

**Description:** Female; 5 feet, pale brown.

**Sessions attended:** P6

## Shark 226

nickname:

*Flicka*

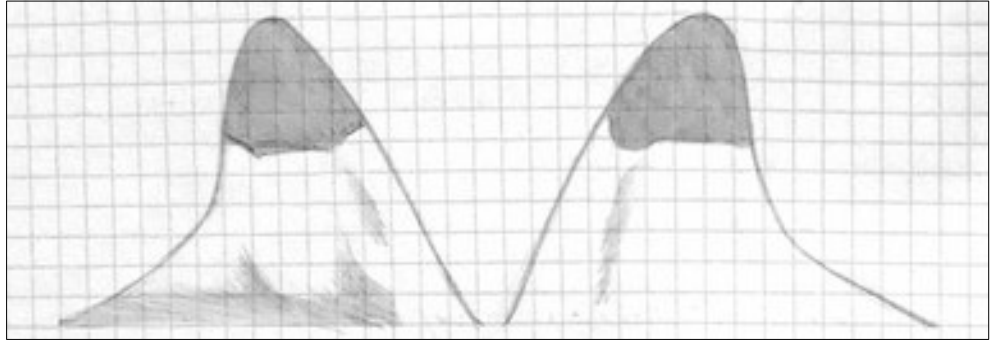

**Description:** Female; 6 feet, grey.

**Sessions attended:** P7

## Shark 227

nickname:

*Sadie*

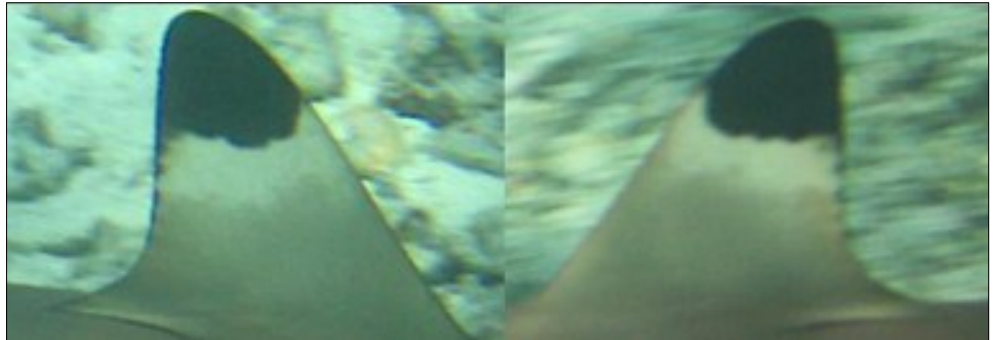

**Description:** Female juvenile; 3.5 feet, brown.

**Sessions attended:** Z65

## Shark 228

nickname:

*Paula*

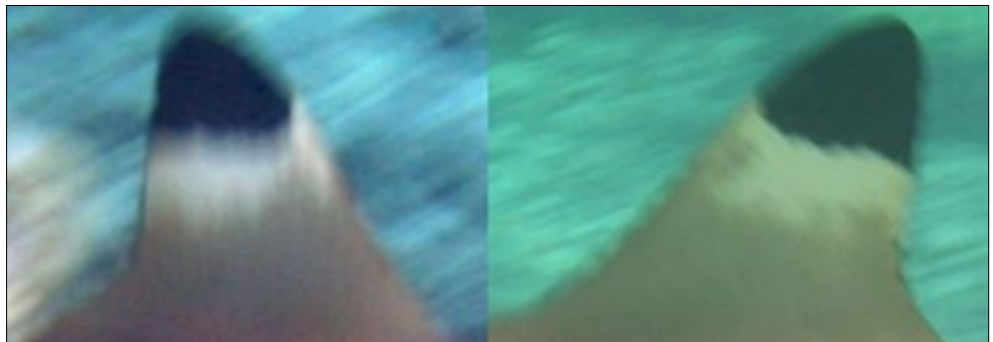

**Description:** Female; 5 feet, brown.

**Sessions attended:** Z65

## Shark 229

nickname:

*Bellela*

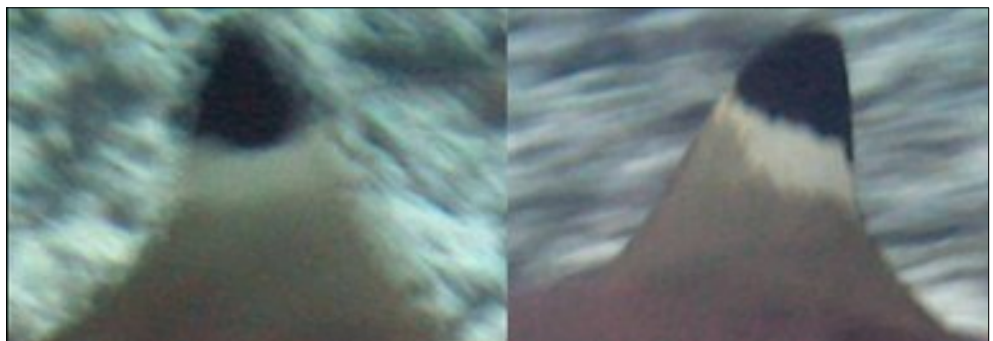

**Description:** Female; 5 feet, grey brown.

**Sessions attended:** z65

### **Shark 230**

nickname:

*Carmen*

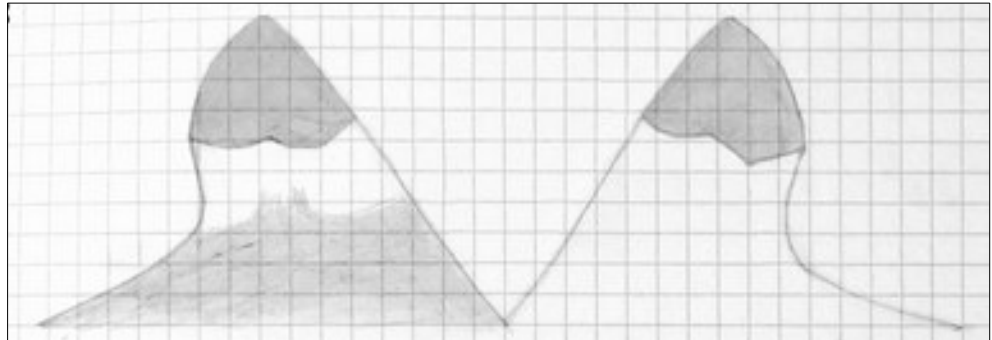

**Description:** Female; 5.5 feet, light grey.

**Sessions attended:** P3, P6, P7

**Comments:** Pregnant

### **Shark 231**

nickname:

*Griffin*

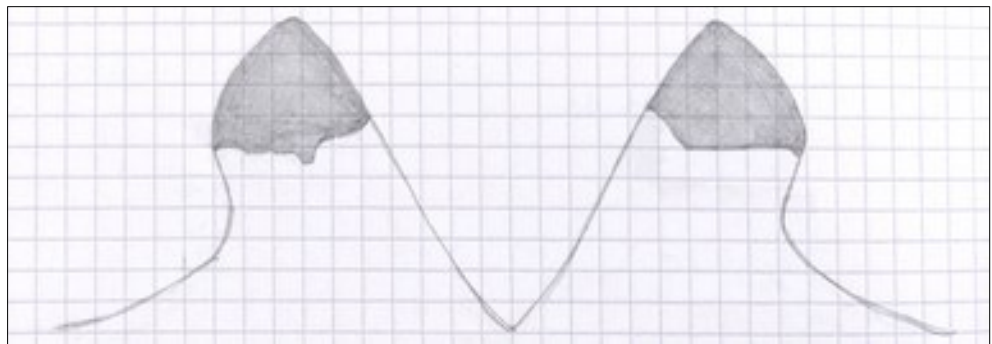

**Description:** Male juvenile; 3.5 feet. Bites out of tail tip.

**Sessions attended:** P3, P6, P7

### **Shark 232**

nickname:

*Revel*

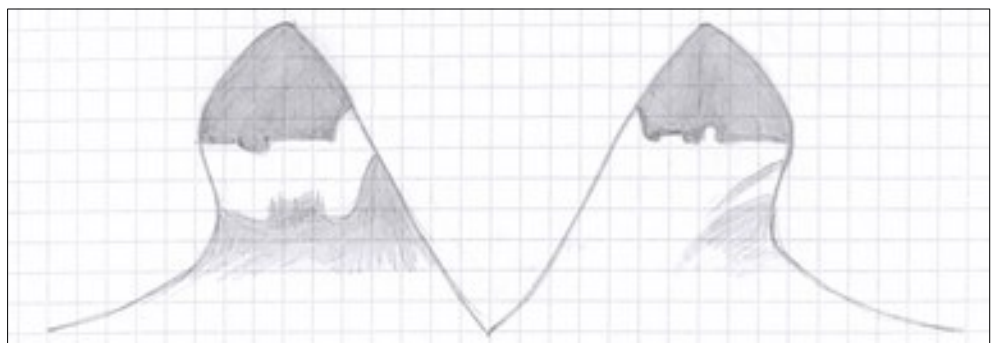

**Description:** Male; 4 feet, dark grey.

**Sessions attended:** B6, B9, B15, B16, A267



### Shark 233

nickname:

*Flynn*

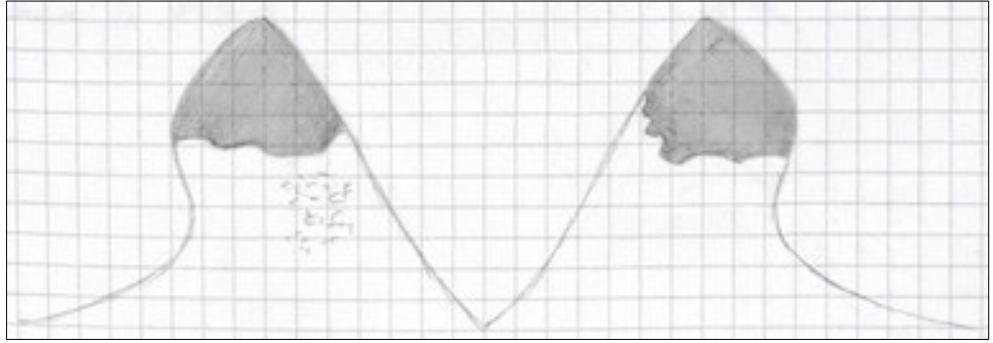

**Description:** Juvenile; 2.5 feet, bronze.

**Sessions attended:** B7,B 8, B19, B21, B23, B24, B25, B26, B29, B38

### Shark 234

nickname:

*Riley*

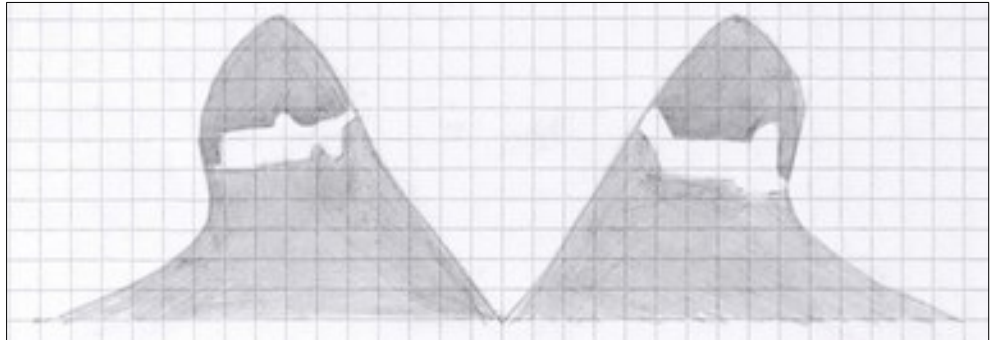

**Description:** Male; 4 feet, dark grey.

**Sessions attended:** C6

### Shark 235

nickname:

*Karelia*

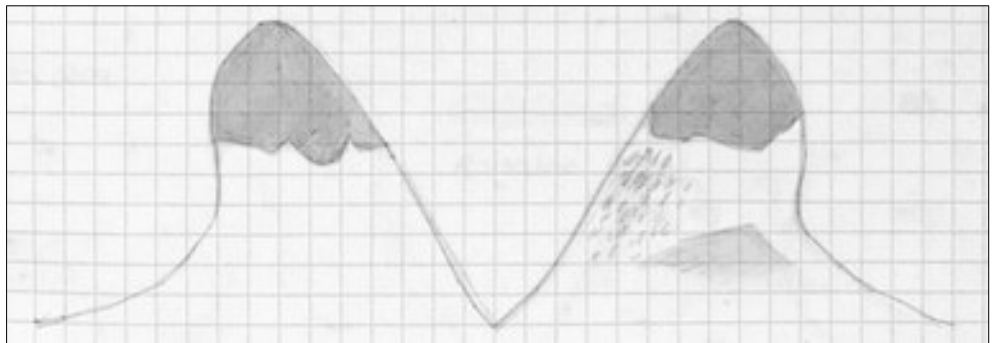

**Description:** Female; 6 feet, dark grey.

**Sessions attended:** C6

## Shark 236

nickname:

*Marianne*

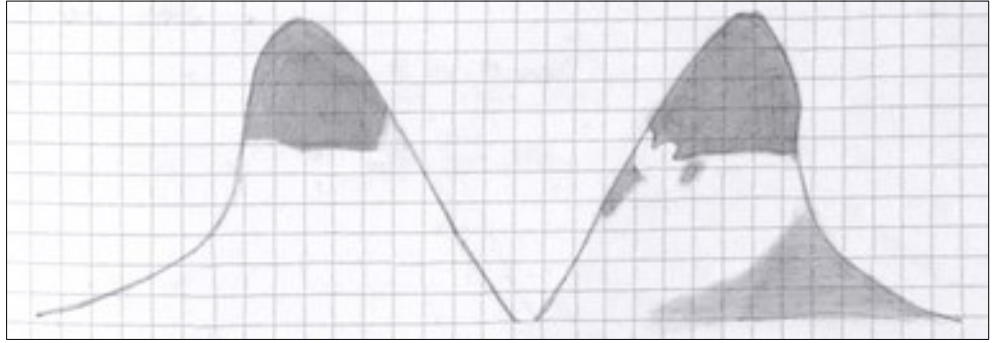

**Description:** Female; 6 feet, med grey.

**Sessions attended:** P1, P2, P3, P5

**Comments:** Shy shark; passes many times just into view before coming with others.

## Shark 237

nickname:

*Chimere*

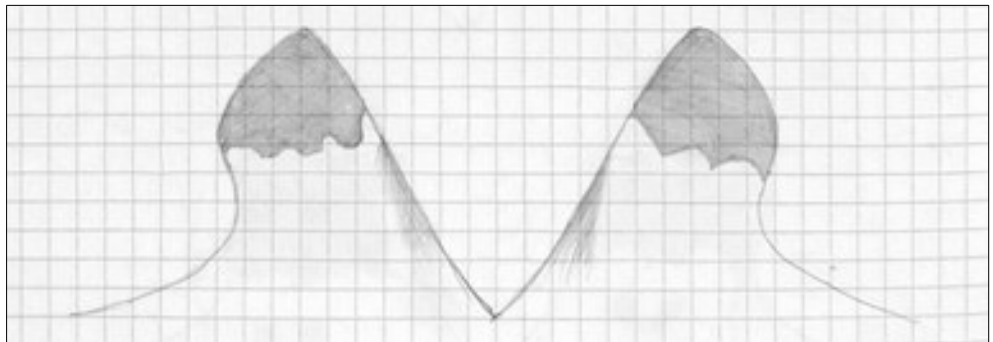

**Description:** Female; 6 feet, grey.

**Sessions attended:** P5

**Comments:** Pregnant.

## Shark 238

nickname:

*Tessa*

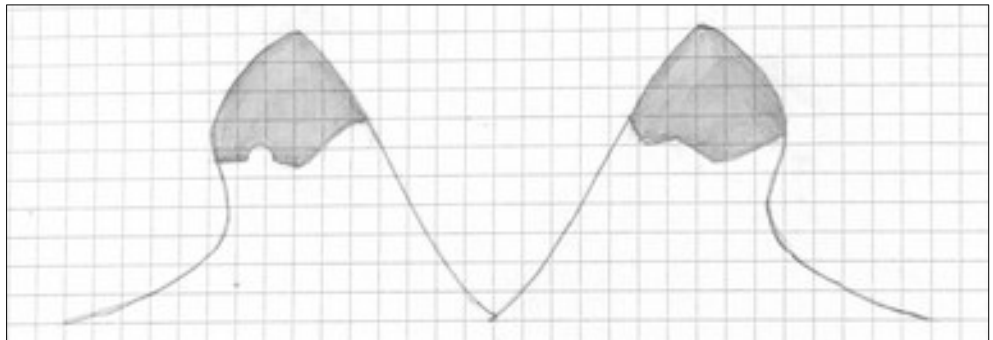

**Description:** Female juvenile; 3.5 feet, grey.

**Sessions attended:** P5

## Shark 239

nickname:

*Tiffany*

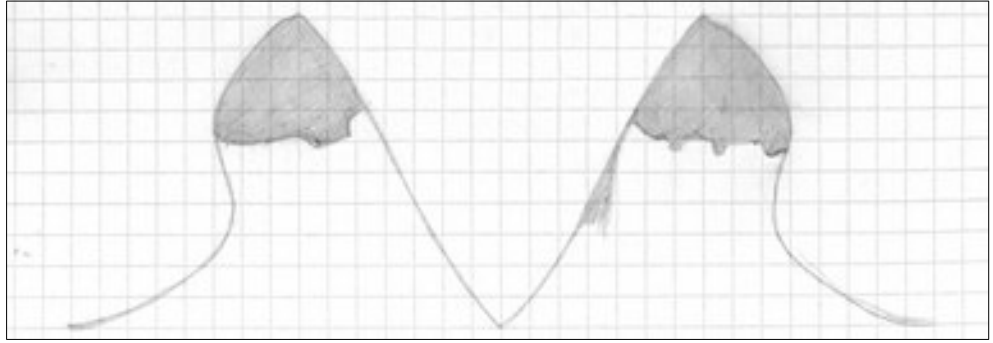

**Description:** Female; 6 feet, grey brown.

**Sessions attended:** P5

## Shark 240

nickname:

*Ambrosia*

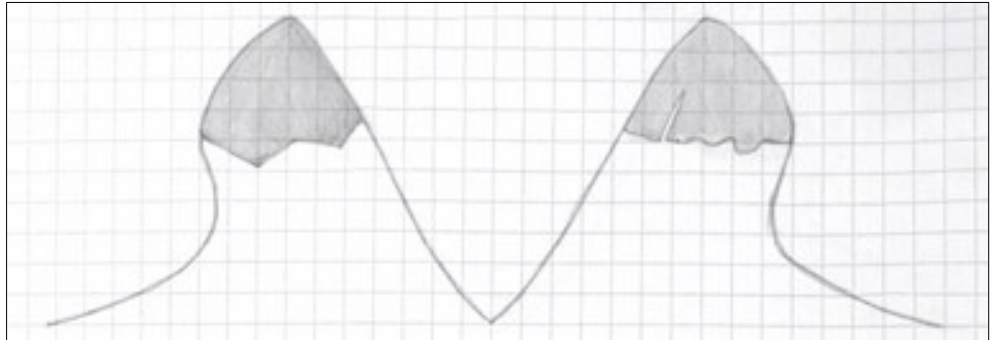

**Description:** Female; 5.5 feet, pale gold. Has a dark blotch, an irregular oval, 2 to 3 inches long, about 5 inches in front of and to the right of dorsal fin.

**Sessions attended:** P5

## Shark 241

nickname:

*Wrath*

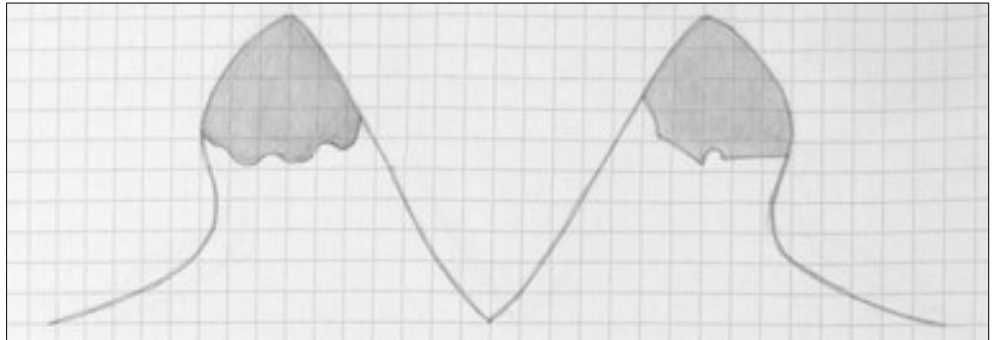

**Description:** Female; 6 feet, grey-brown. Blotchy skin, an older shark. Magnificent.

**Sessions attended:** P5, P6, P7

## Shark 242

nickname:

*Coquille*

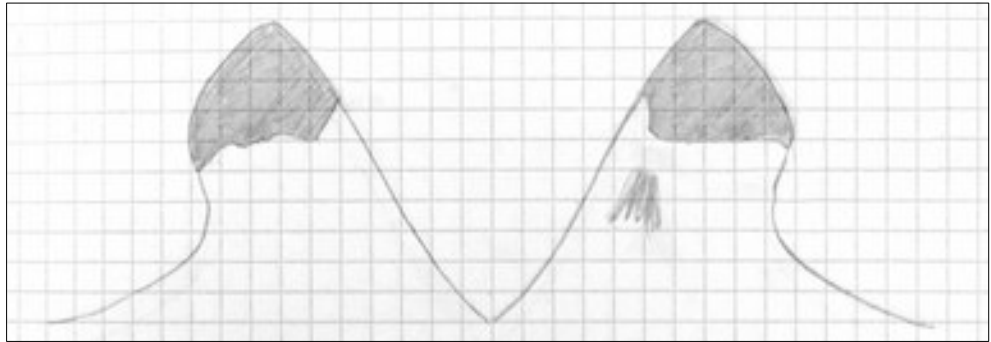

**Description:** Pup; 2 feet, bronze.

**Sessions attended:** P5

## Shark 243

nickname:

*Chook*

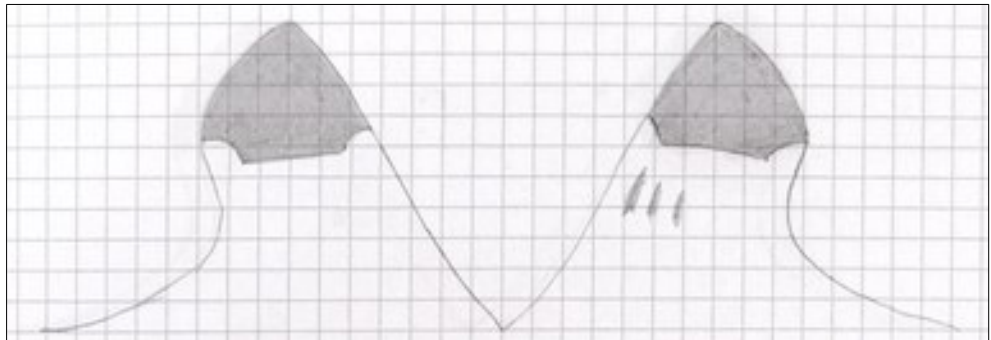

**Description:** Juvenile; 3 feet.

**Sessions attended:** P3

## Shark 244

nickname:

*Christobel-like*

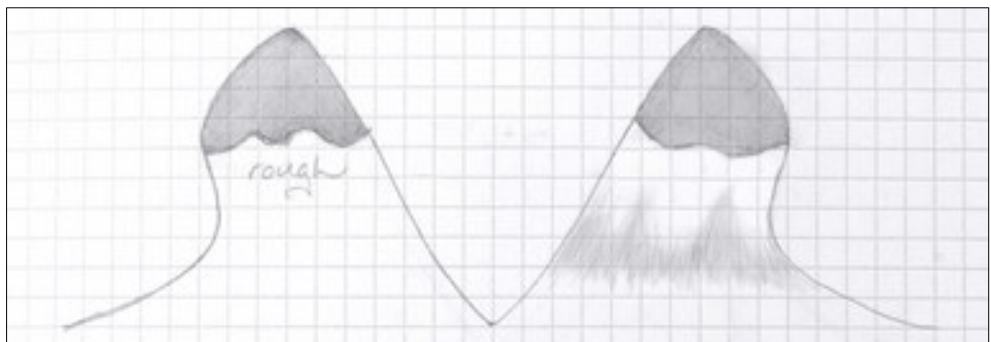

**Description:** Juvenile; 3.5 feet.

**Sessions attended:** P3

### **Shark 245**

nickname:

*Tillie*

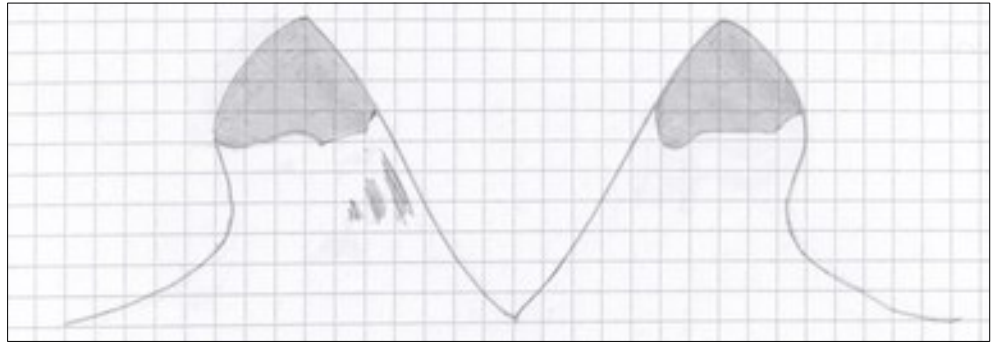

**Description:** Juvenile; 3.5 feet.

**Sessions attended:** P3

### **Shark 246**

nickname:

*BW Lookalike*

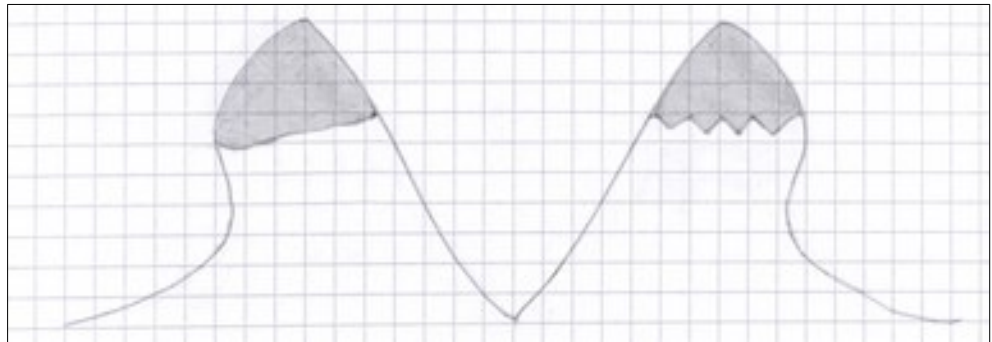

**Description:** Juvenile; 3.5 feet.

**Sessions attended:** z3, z4

### **Shark 247**

nickname:

*Willow lookalike*

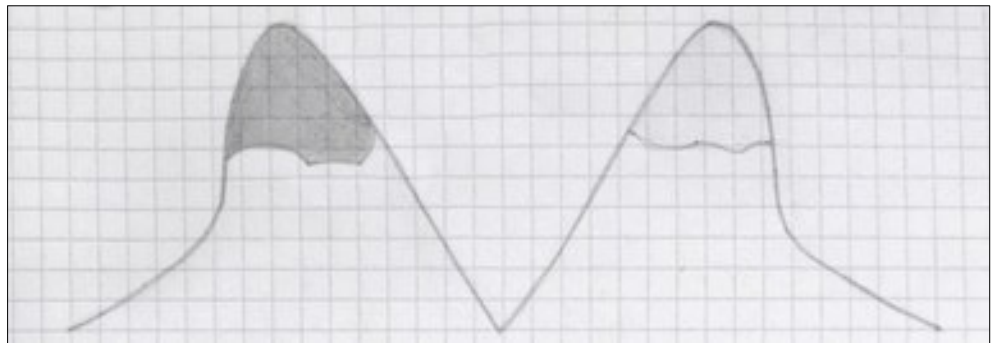

**Description:** Female; 6 feet. Several light markings on right side forming rough line from and posterior to dorsal fin. Circled one way and I only glimpsed the left side.

**Sessions attended:** C7



## Shark 248

nickname:

*Beth lookalike*

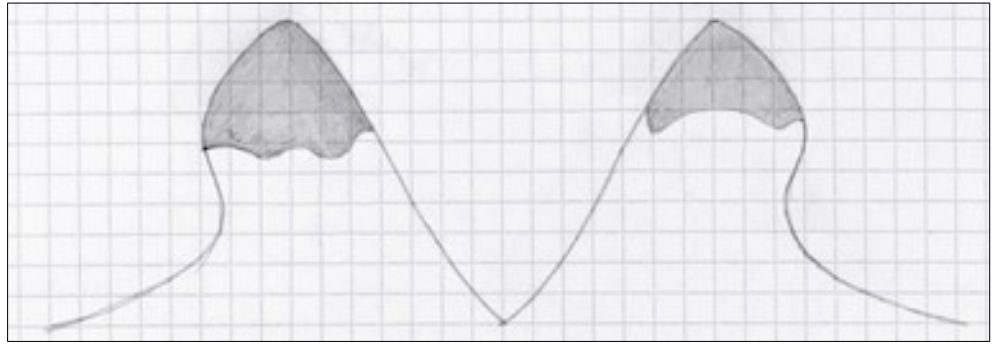

**Description:** Female; 5.5 feet, grey.

**Sessions attended:** z4, z5

## Shark 249

nickname:

*Lily*

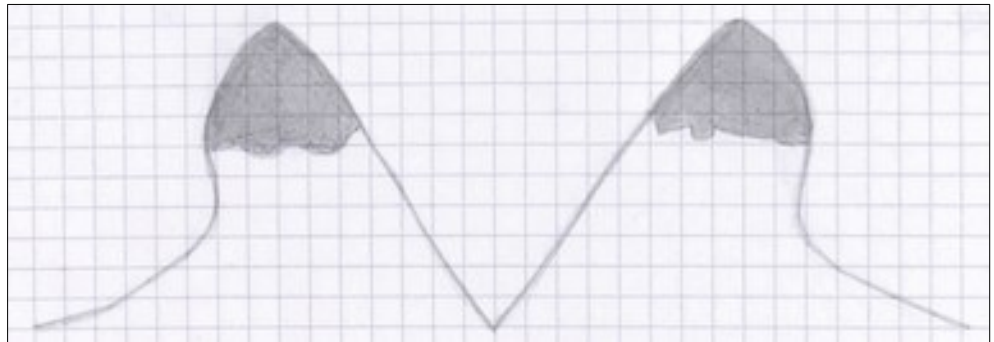

**Description:** Female; 3.5 feet, grey.

**Sessions attended:** C7

**Comments:** Pregnant

## Shark 250

nickname:

*Amelia*

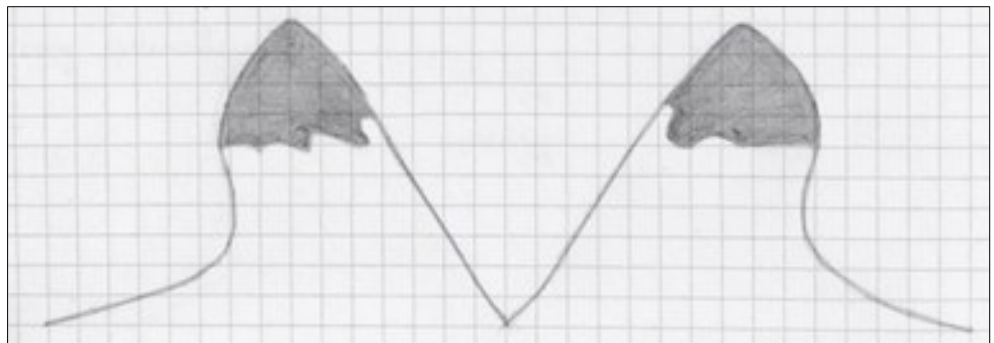

**Description:** Female; 5 feet, grey. Three light dots one inch apart base of dorsal fin right side.

**Sessions attended:** E1, E2, C7, C8, C10, B35

**Comments:** Only shark, male or female, seen in B section and at the E section site.

## Shark 251

Nickname:

*Fern*

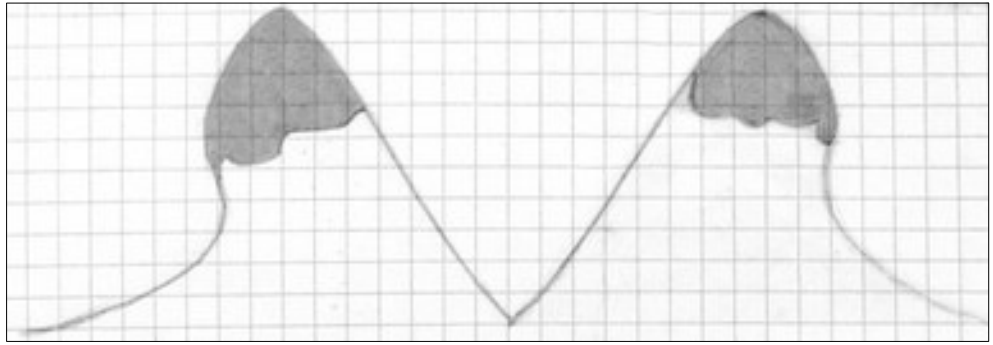

**Description:** Pup; 2 feet.

**Sessions attended:** 163, 181, 198

## Shark 252

nickname:

*Mora*

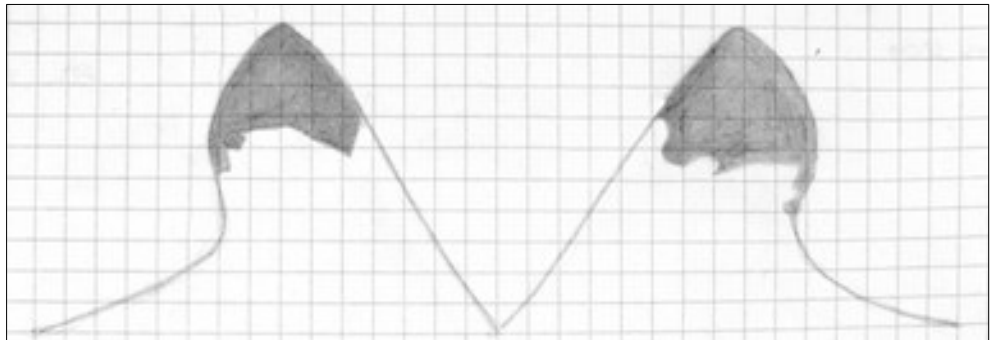

**Description:** Female; 6 feet.

**Sessions attended:** C7, C8, E3

**Comments:** Came to E session with Amelia and she came with her to C7 and 8 too.

## Shark 253

nickname:

*Butterfly*

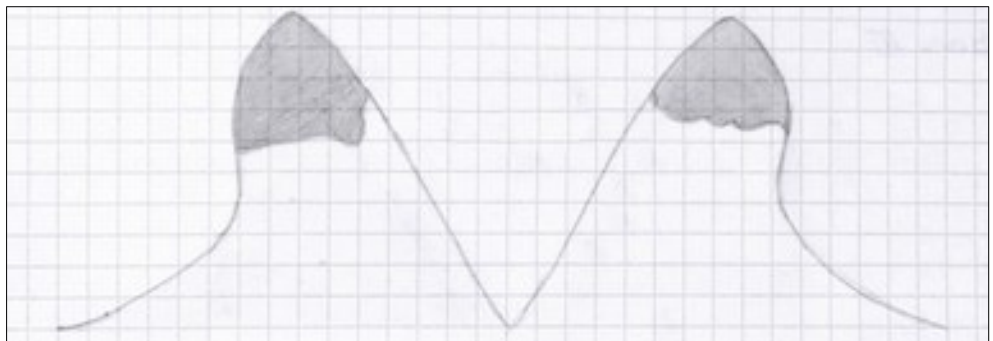

**Description:** Female; 3.5 feet, brown.

**Sessions attended:** 181

**Comments:** She saw me, approached, and slowly circled an arm's length away while I drew her fin. She never came to the feeding upcurrent at the site. Another juvenile on the move.

## Shark 254

nickname:

*Ondine*

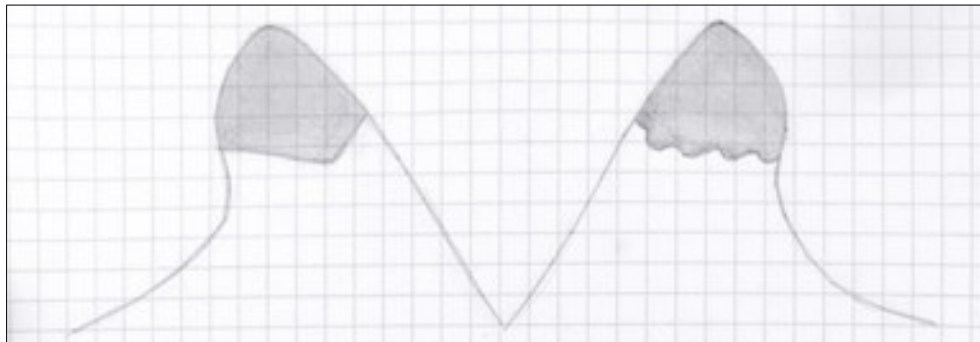

**Description:** Female; 3.5 feet, grey when identified.

**Sessions attended:** 184, z6, 187-188, 190-193, 195, z13, 196, z14, 197, y10, 201, 203, 204, 210-213, 216-219, 230-239, 242-247, a18, a20, z23, B9, 252-256, B24, z28, z32, B31, z34, z35, B35-38, 257, B39, 260, B40, B41, B43, 264, 266, 267, 273, 274, 279, a30, 286, 289, a32, 290, 291, 293, z41, z43, 296, z44, 297, 298, z46, 299, 301, 302, z50, 304, 305, z54, z55, z56, z57, z58, z59, z60, z61

**Comments:** After she matured she would accompany me when she found me in the lagoon.

## Shark 255

nickname:

*Florence*

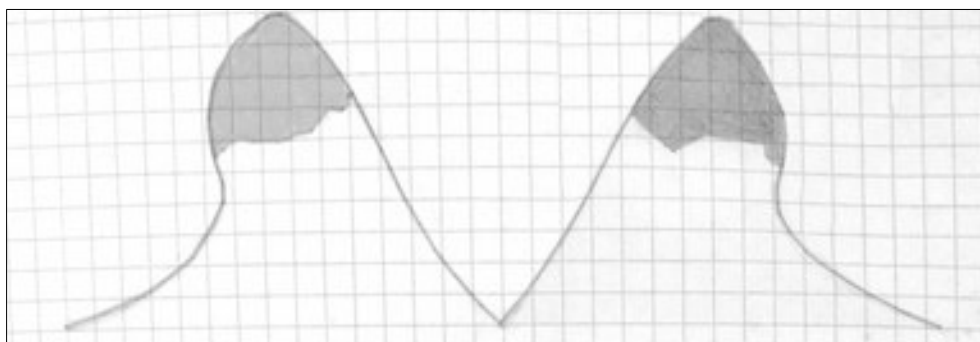

**Description:** Female; 3.5 feet, bronze. Large light mark mid right side.

**Sessions attended:** P1

## Shark 256

nickname:

*Brandy lookalike*

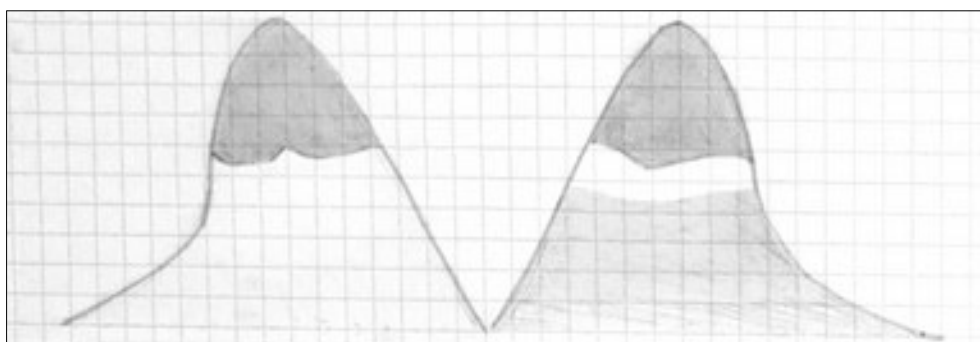

**Description:** Female juvenile; 3 feet, dark brown.

**Sessions attended:** P1

### **Shark 257**

nickname:

*Chaparral*

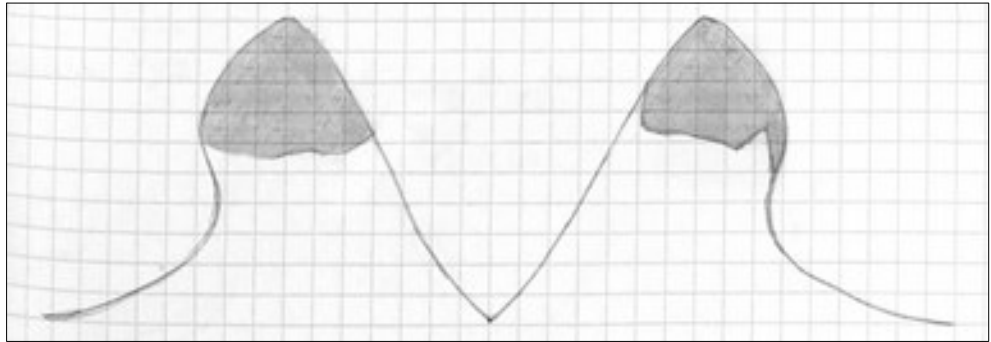

**Description:** Male; 3.5 feet, brown.

**Sessions attended:** E7

### **Shark 258**

nickname:

*Sleat*

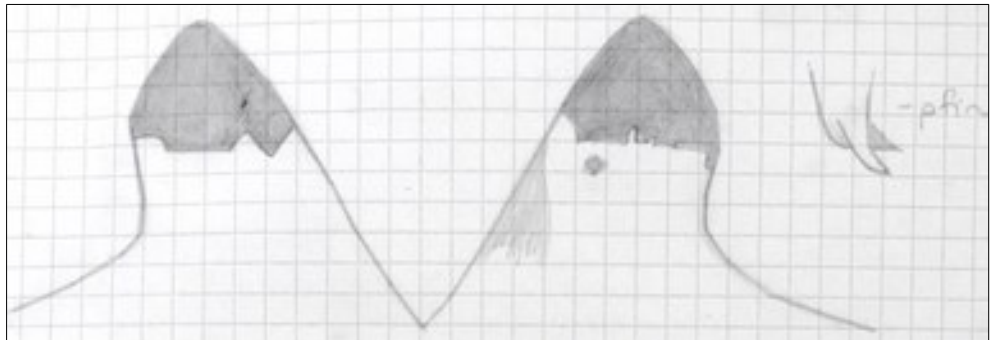

**Description:** Male; 4 feet, grey.

**Sessions attended:** C7, C8

**Comments:** Left pectoral fin deformed or injured and healed badly. See drawing.

### **Shark 259**

nickname:

*Columbine*

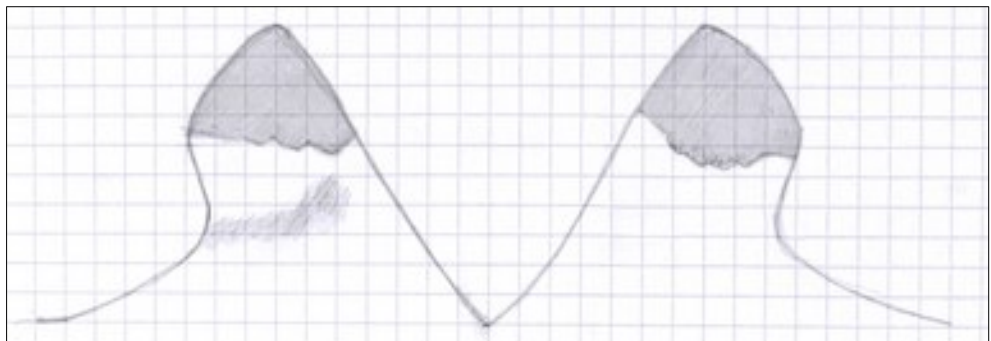

**Description:** Female juvenile; 4 feet, gold, and growing fast. Later she was light brown.

**Sessions attended:** z34, B32, 257, 259, 261, 267, 272, 287, 288, 290, 295, 302, 303, z54, z59, z61, z63, z64

## Shark 260

nickname:

*Forget-me-not*

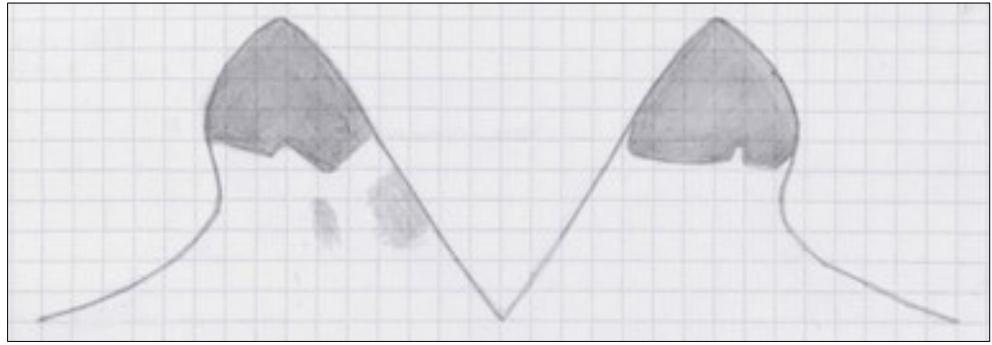

**Description:** Female; 6 feet, brown.

**Sessions attended:** C1

**Comments:** Pregnant.

## Shark 261

nickname:

*Randall*

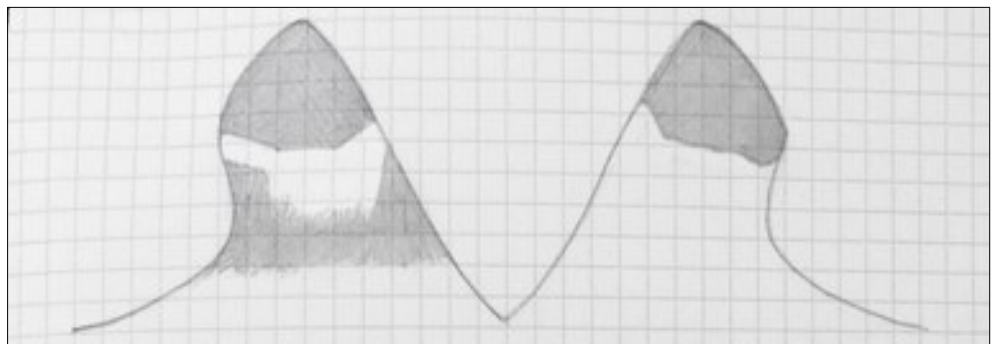

**Description:** Male juvenile; 3.5 feet, brown.

**Sessions attended:** P1, P5, P7

## Shark 262

nickname:

*Mercy*

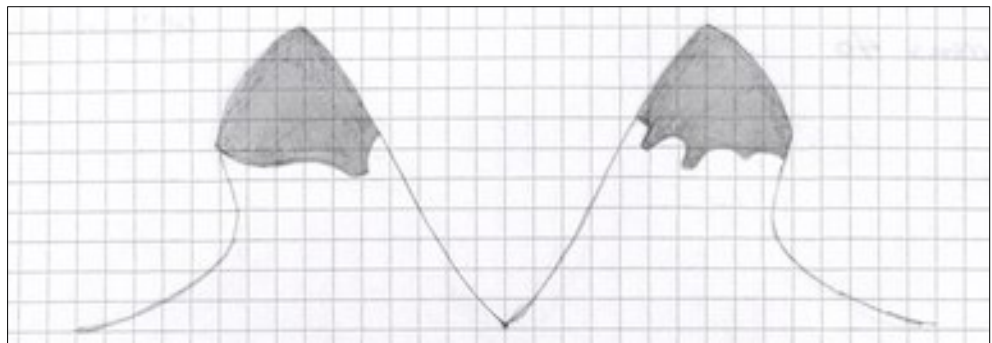

**Description:** Female; 5.5 feet, pale grey. A heavy-set animal.

**Sessions attended:** P1, P3, P6

**Comments:** On our first meeting she swam straight in from beyond visual range to my face in three feet of water with two more large females behind her. With my back to some coral I had nowhere to retreat to! *Mercy!*

**Comments:** Pregnant.



## Shark 263

nickname:

*Tripoli*

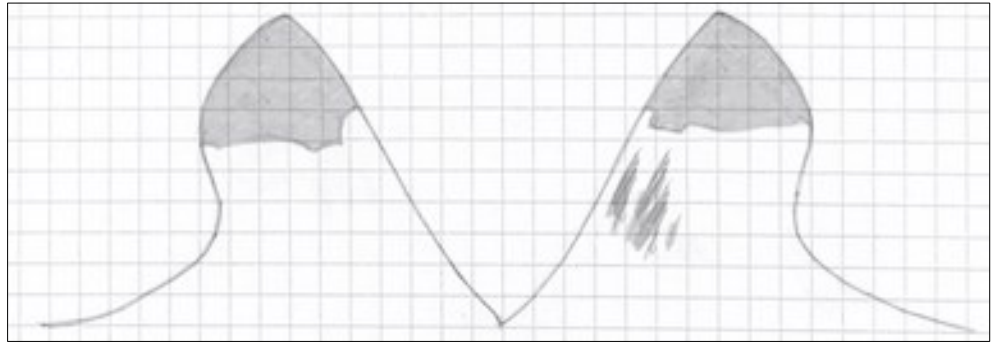

**Description:** Female; 5.5 feet, brown-grey.

**Sessions attended:** P1, P5, P6, P7

**Comments:** Pregnant.

## Shark 264

nickname:

*Twinkling*

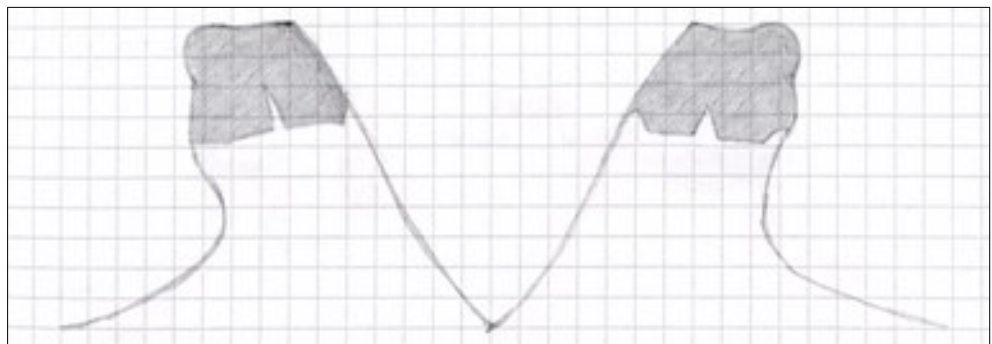

**Description:** Female; 3 feet, brown.

**Sessions attended:** P1, P5, P6

## Shark 265

nickname:

*Kinnikinick*

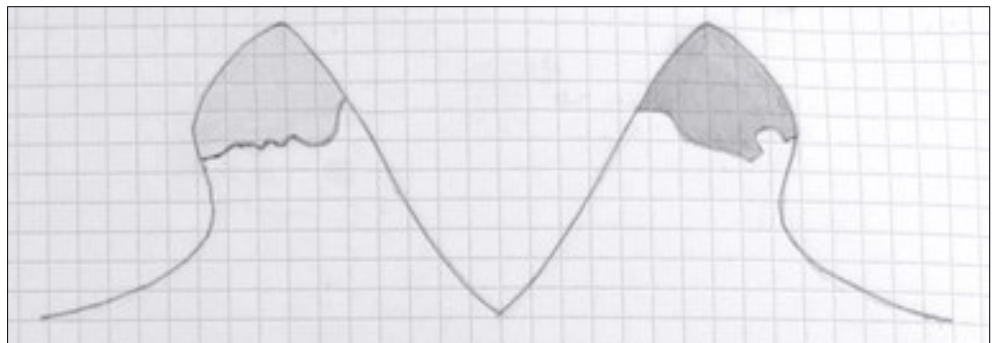

**Description:** Male; 3.5 feet.

**Sessions attended:** P1, P3, P6, P7

## Shark 266

nickname:

*Florin*

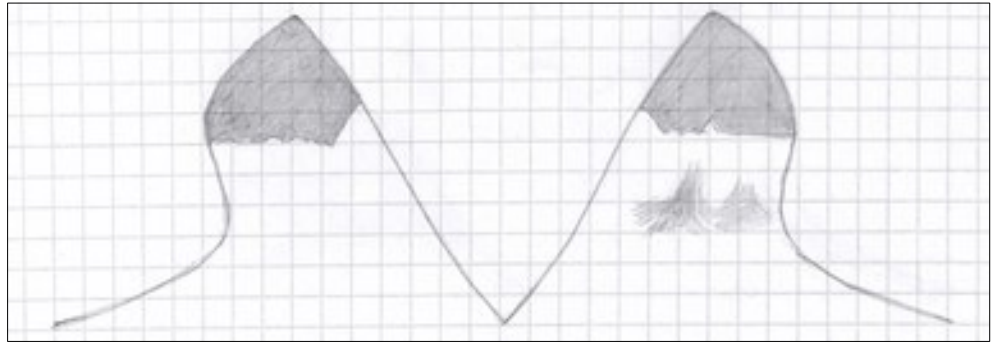

**Description:** Male; 3 feet when first identified.

**Sessions attended:** B sessions: 6-9, 11, 15, 18-23, 25, 26, 28, 29, 32, 35,36, 39, 40, 43, 44

## Shark 267

nickname:

*Pom*

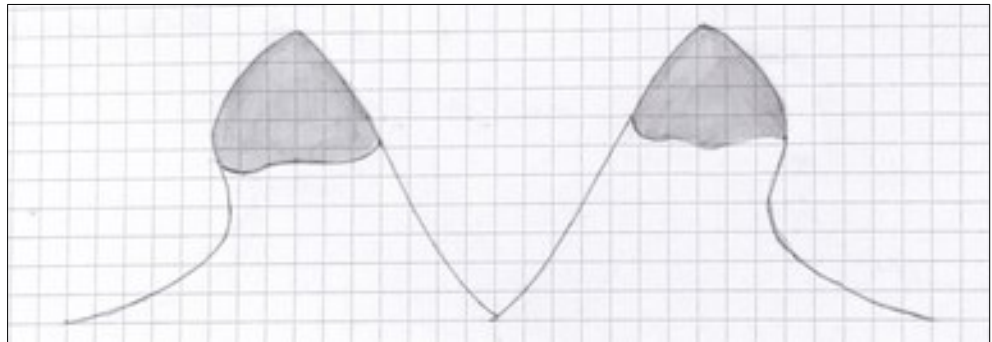

**Description:** Female; 3.5 feet, brown.

**Sessions attended:** P1, P5, P6

## Shark 268

nickname:

*Coquette*

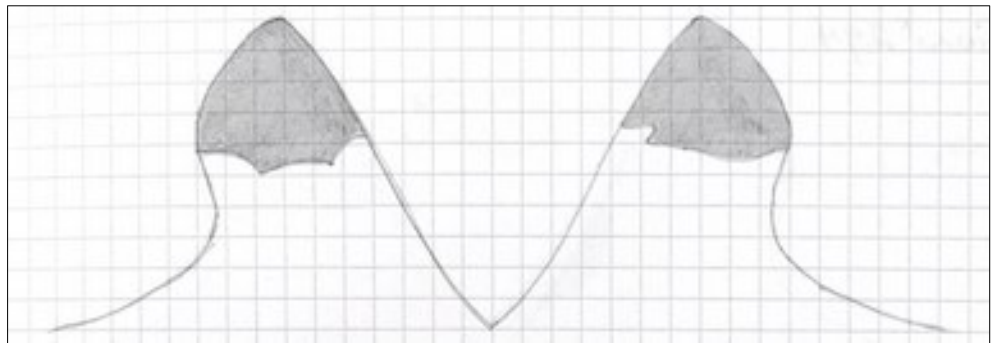

**Description:** Female; 3.5 feet, brown.

**Sessions attended:** P1, P2, P6

## Shark 269

nickname:

*Alitoo*

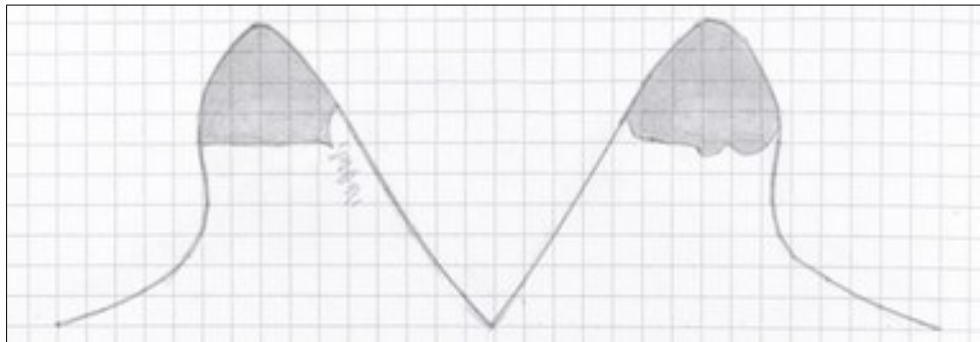

**Description:** Pup; 2 feet, bronze.

**Sessions attended:** 187, 188

**Comments:** Named for her fin tip right side. Never saw her again.

## Shark 270

nickname:

*Lavoisier*

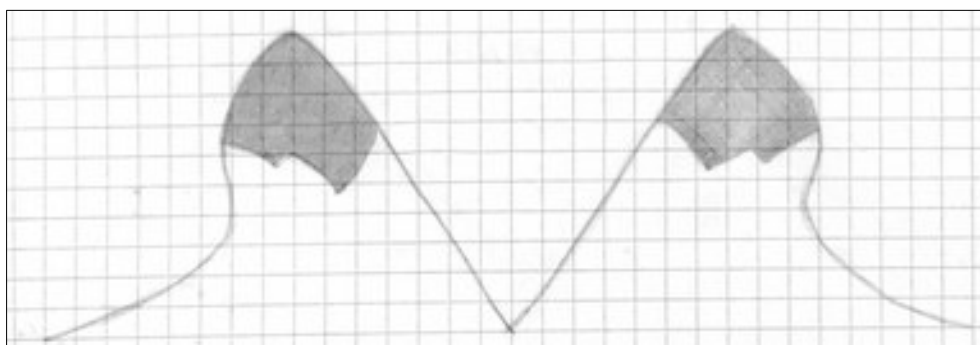

**Description:** Male; 4 feet, grey.

**Sessions attended:** B8, Ba3, z30, z33, 265

**Comments:** Seemed to visit from the ocean during mating season and preferred Section B, coming at times into the eastern part of Section A—the barrens.

## Shark 271

nickname:

*Capri*

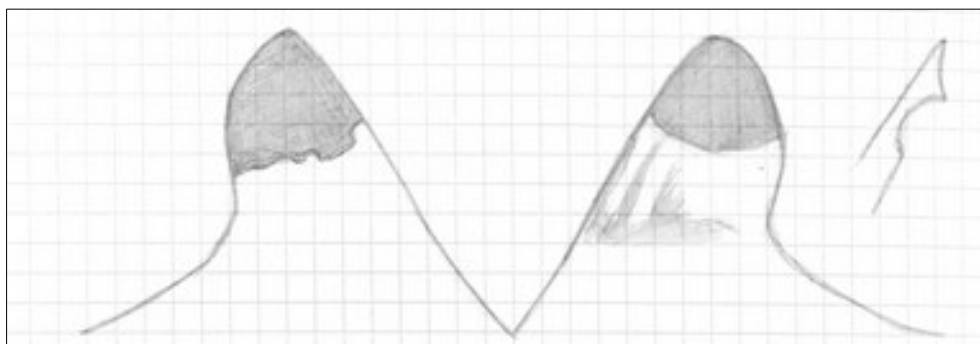

**Description:** Male juvenile; 3.5 feet.

**Sessions attended:** z14, 199, 204, 210, 211, 213-215, 219, 230, 239, 245, 271, 280, 282, z41, 293-296, 298, 299

**Comments:** Bites out of tail, leaving tiny triangle at the top.

## Shark 272

nickname:

*Annabelle*

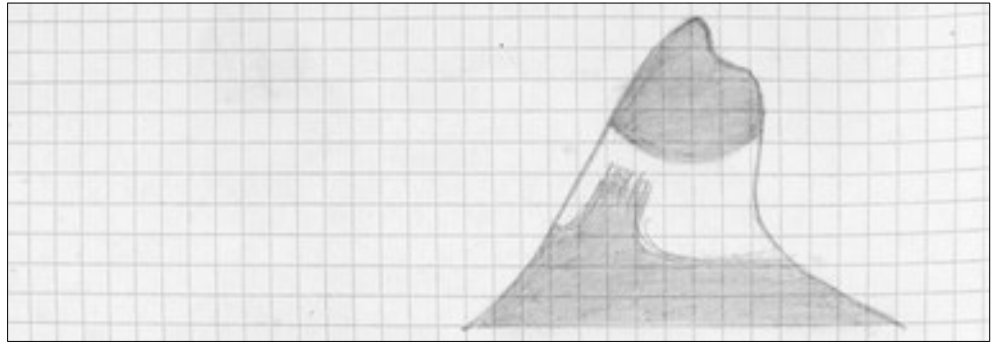

**Description:** Female; 4 feet, light grey.

**Sessions attended:** y8, z39

**Comments:** Bite out of upper trailing edge of dorsal fin.

## Shark 273

nickname:

*Dane*

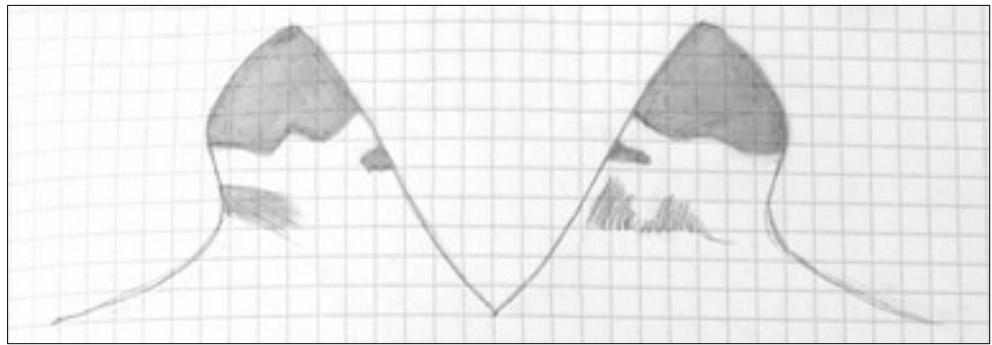

**Description:** Male; 4 feet.

**Sessions attended:** O4

## Shark 274

nickname:

*Alexander*

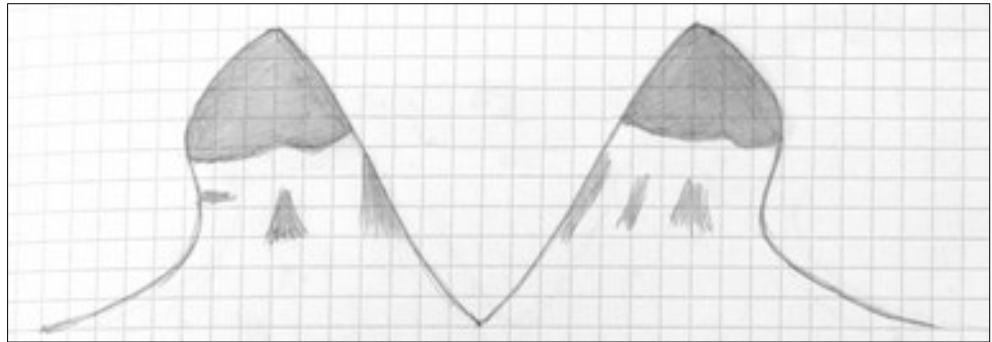

**Description:** Male; 4 feet.

**Sessions attended:** O4, O5

**Comments:** Strange that these males roaming on the other side of the reef never come to the sessions. Nearly all males at the ocean sessions are complete unknowns with rare and surprising exceptions.

## Shark 275

nickname:

*Odin*

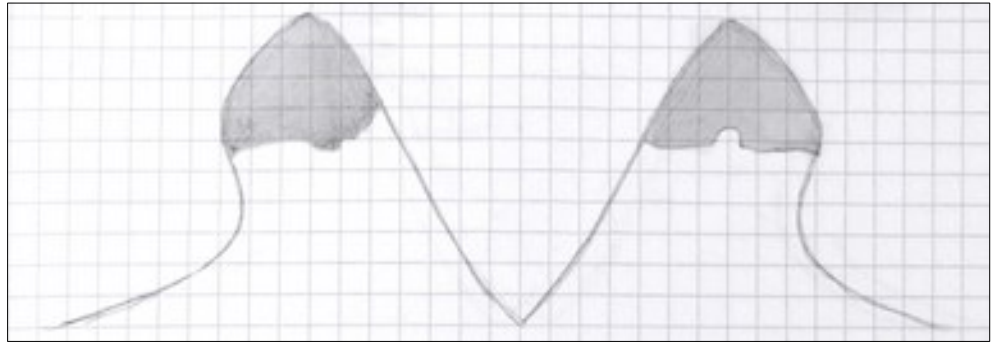

**Description:** Male; 3.5 feet.

**Sessions attended:** P1, P3, P6, P7

## Shark 276

nickname:

*Spooky lookalike*

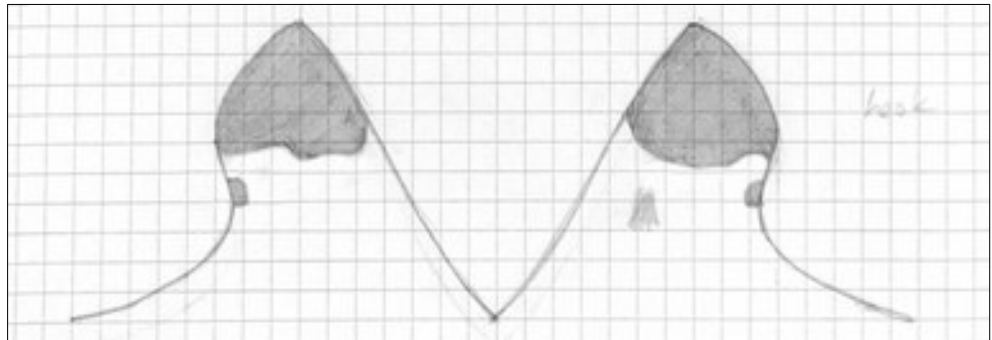

**Description:** Male; 4 feet.

**Sessions attended:** O4

## Shark 277

nickname:

*Teardrop lookalike*

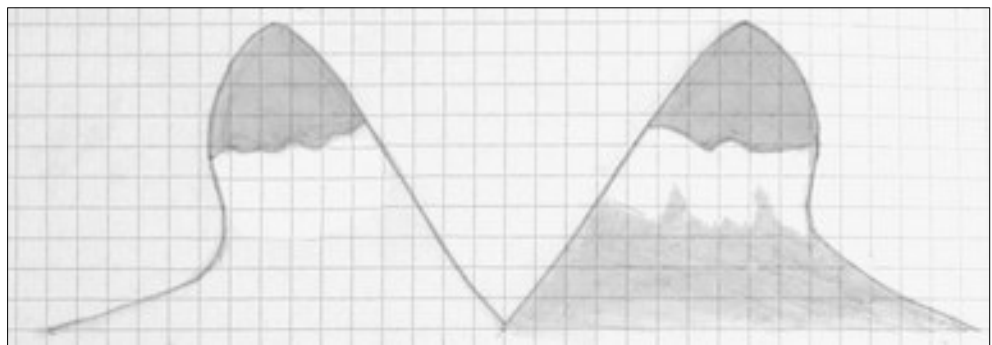

**Description:** Male; 3.5 feet. Resembled Teardrop's fin on the left side; saw the right from a distance so the drawing is only an impression. But there were no prominent features.

**Sessions attended:** O5



## Shark 278

nickname:

*Draconi*

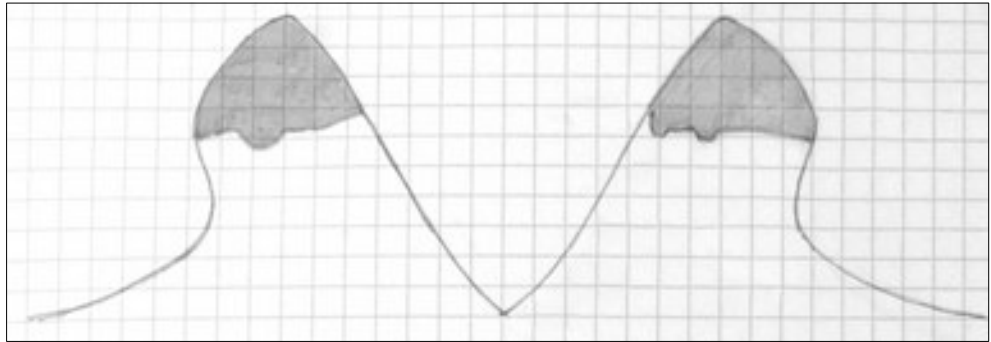

**Description:** Male; 4 feet.

**Sessions attended:** 25, 31

**Comments:** Aggressive shark, reminiscent of Splash Reversed. The only times he came he made super fast charges from beyond visual range when I was distracted. Plus it was always when it was dark and many other sharks came behind.

## Shark 279

nickname:

*Kinnikin*

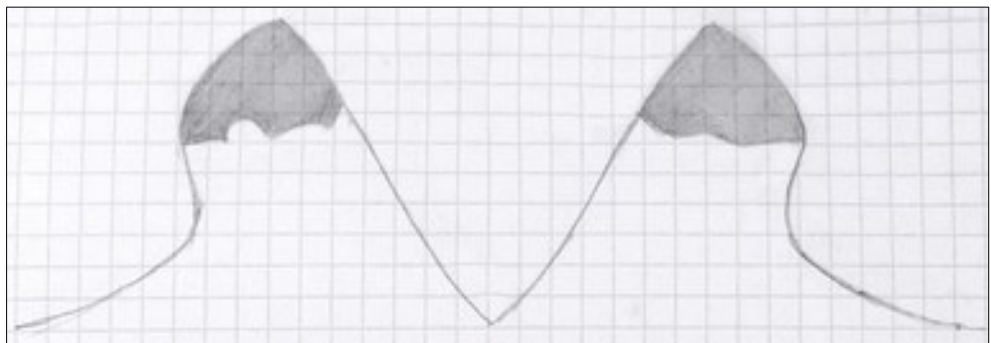

**Description:** Pup; 2.5 feet.

**Sessions attended:** B6, B7, B8, B10, B11, B26, B27

## Shark 280

nickname:

*Mystere*

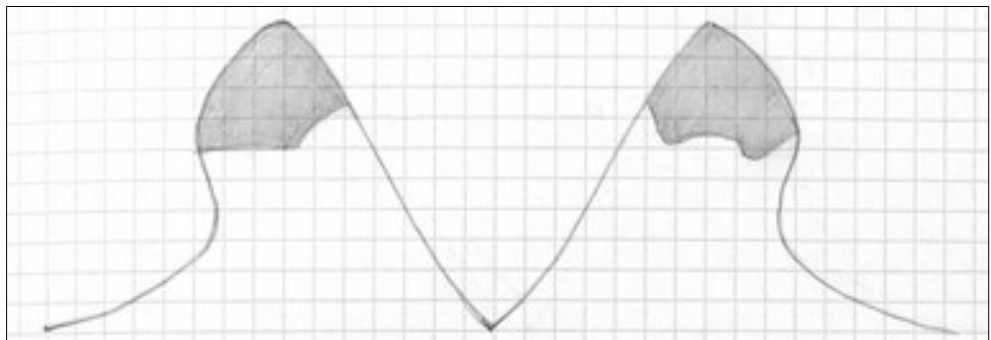

**Description:** Female; 5 feet.

**Sessions attended:** O5

**Comments:** A mystery to find an unknown female shark in the ocean. Very unusual.

## Shark 281

nickname:

*Prince*

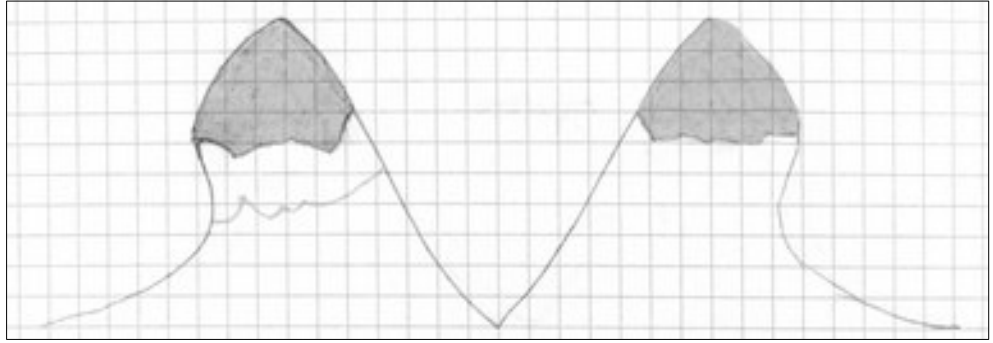

**Description:** Male juvenile; 3.5 feet.

**Sessions attended:** z62, z63

## Shark 282

nickname:

*Badu*

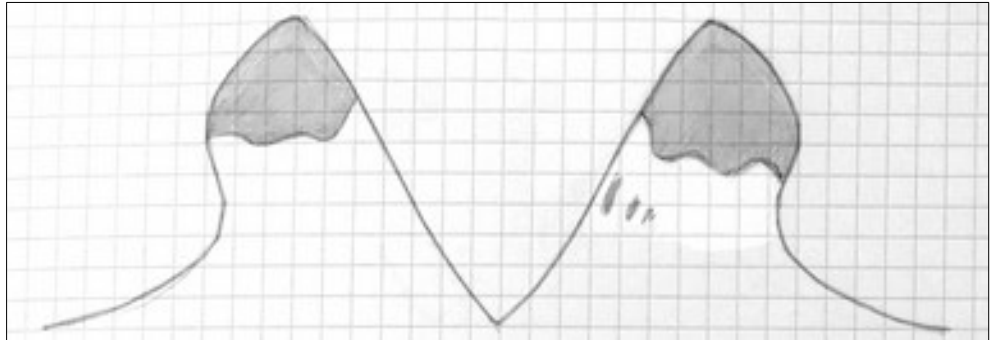

**Description:** Male; 4 feet.

**Sessions attended:** B27

## Shark 283

nickname:

*Marian*

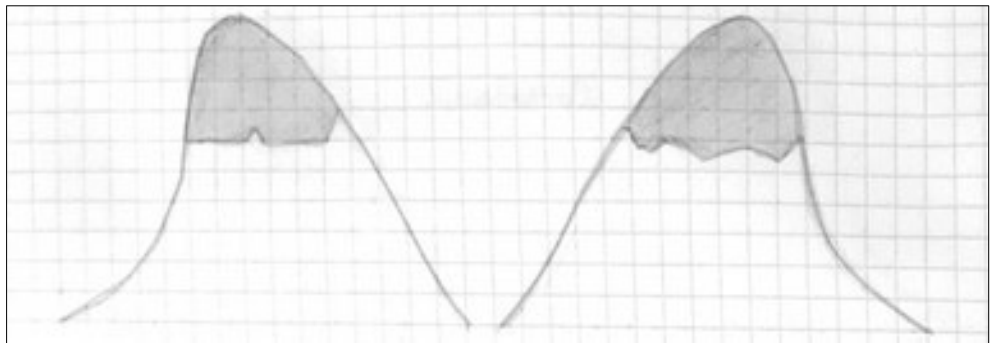

**Description:** Female; 5.5 feet, grey

**Sessions attended:** 198

## Shark 284

nickname:

*Fawn lookalike*

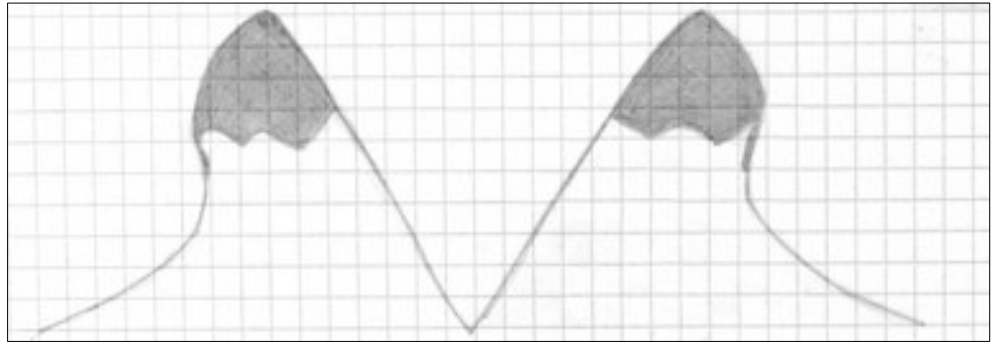

**Description:** Pup; 2 feet.

**Sessions attended:** 198

## Shark 285

nickname:

*Feolin*

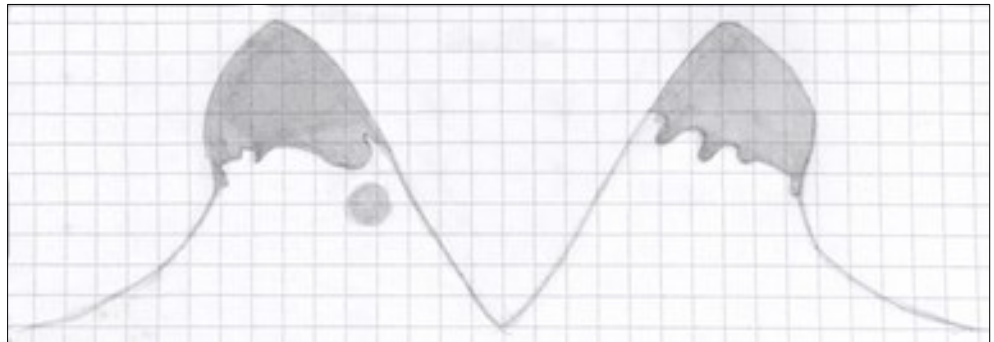

**Description:** Female; 6 feet, grey.

**Sessions attended:** C8, C9, C10

**Comments:** Mated between 8 and 9 (October 5, 01 and November 10, 01)

## Shark 286

nickname:

*Keltie*

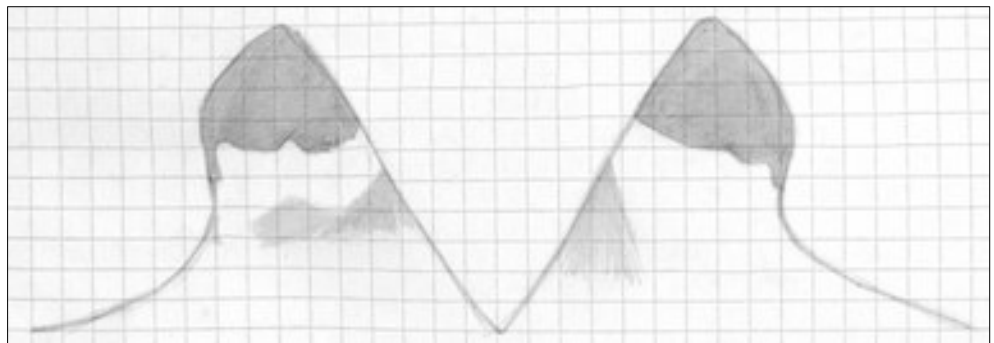

**Description:** Female; 4.5 feet, light brown.

**Sessions attended:** C8

## Shark 287

nickname:

*Caro*

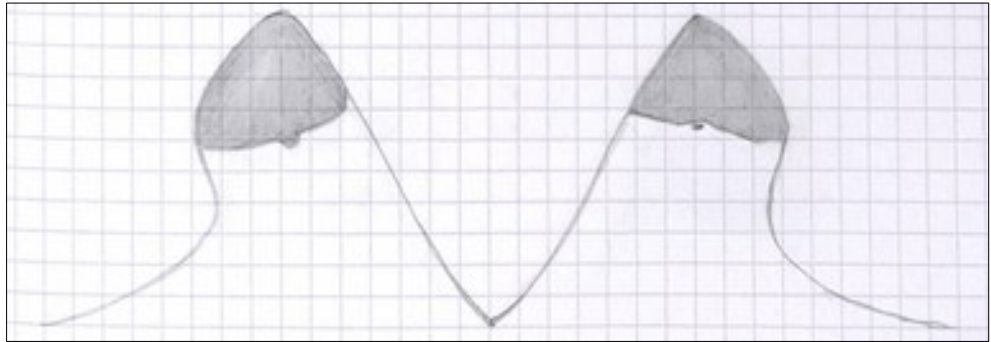

**Description:** Male; 4 feet, grey.

**Sessions attended:** 231, B11, B21, B34, B36, B37, B39, B40, B42, 267, z59, z60

## Shark 288

nickname:

*Killy*

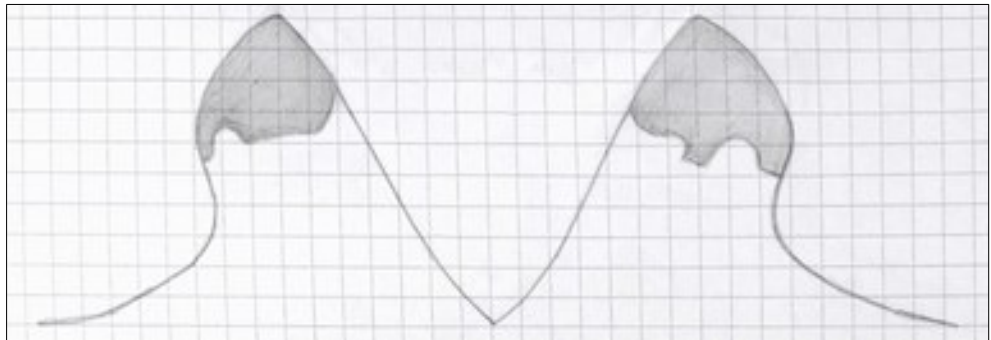

**Description:** Male juvenile; 3.5 feet, light brown.

**Sessions attended:** B sessions: 27, 29, 32, 34, 35, 39, 40, 42-45, A279

**Comments:** Always comes after sunset and makes makes fast close approaches, often from behind.

## Shark 289

nickname:

*Teaser*

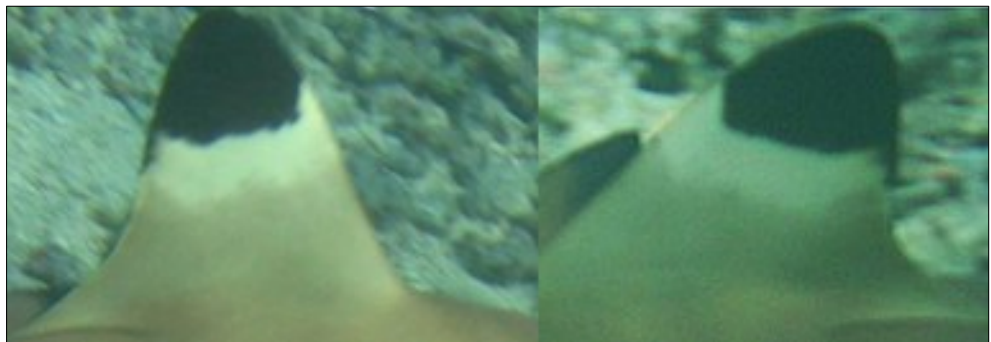

**Description:** Female juvenile; 3.5 feet, light brown.

**Sessions attended:** z60, z66

## Shark 290

nickname:

*Brambling*

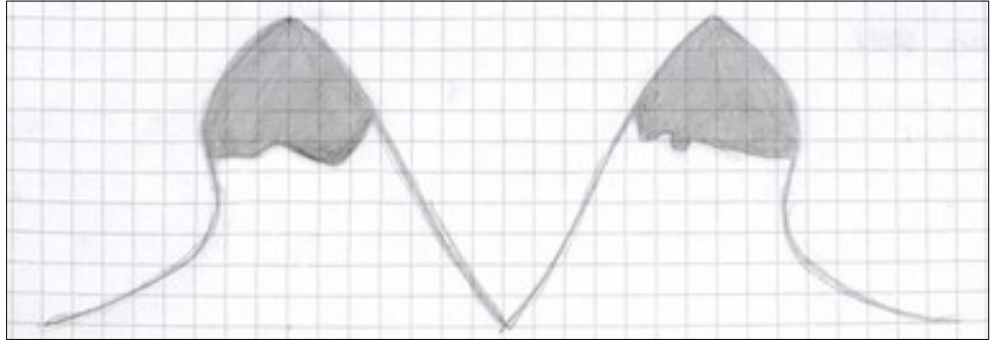

**Description:** Male; 4 feet, light brown.

**Sessions attended:** 235, 241, O1, z32,

Comments: Young male apparently beginning to make the transition to life on the outer slope.

## Shark 291

nickname:

*Yorkey*

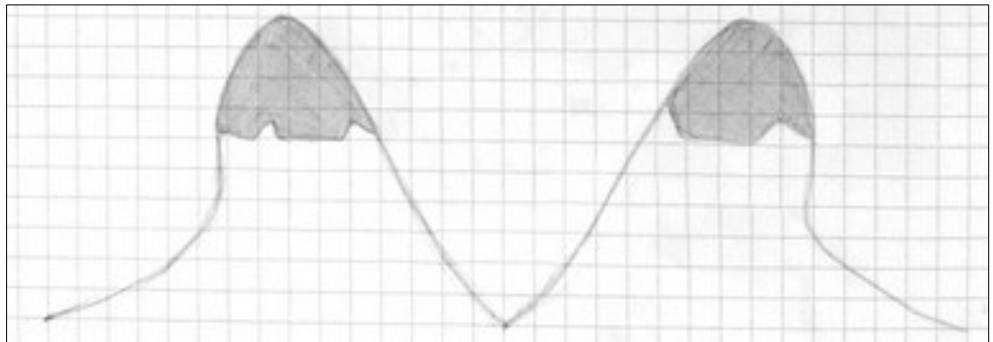

**Description:** Male; 4 feet, grey.

**Sessions attended:** B28

## Shark 292

nickname:

*Danny*

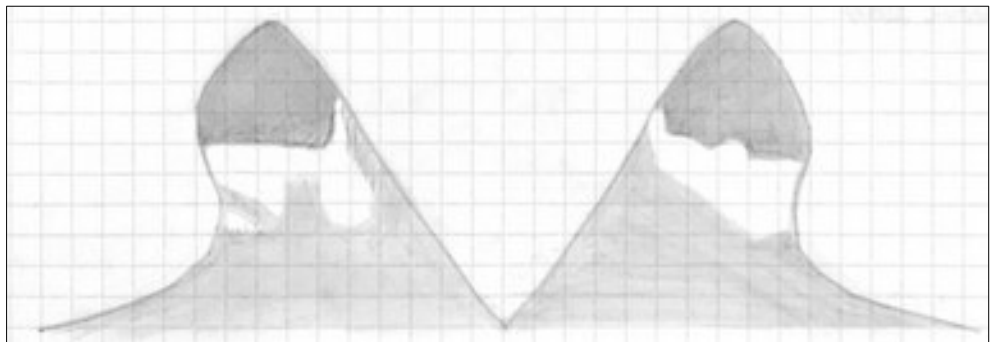

**Description:** Male; 4.5 feet, brown. Magnificent large male.

**Sessions attended:** 203, 223, 235, C11, B17, B19, B21, B24, B35, B36, B40, B45



## Shark 293

nickname:

*Arcady*

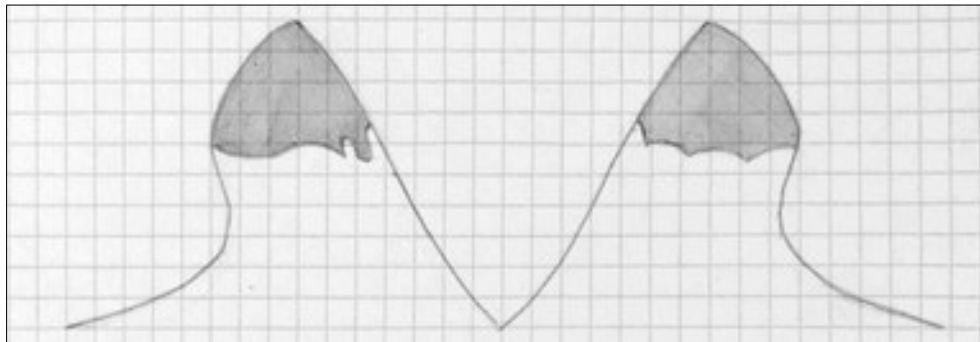

**Description:** Male; 4 feet, grey.

**Sessions attended:** C8

## Shark 294

nickname:

*Danny look-alike*

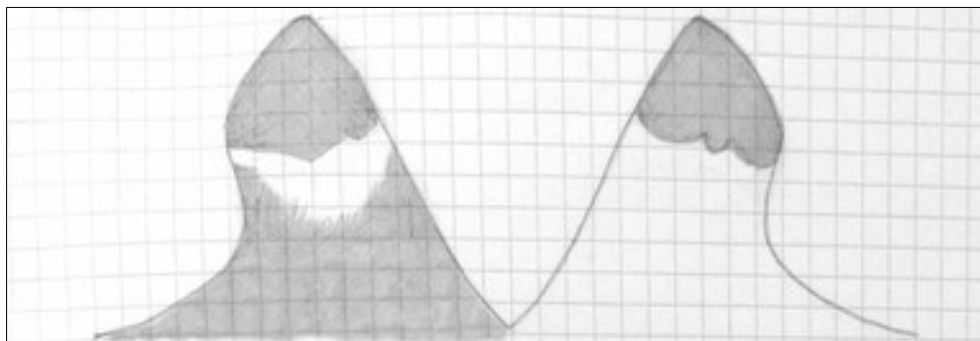

**Description:** Male; 4.5 feet. General appearance like Danny—big male, dark fin. But could not draw both fins up close so drawings give general look.

**Sessions attended:** O1, O2, O5

## Shark 295

nickname:

*Sham*

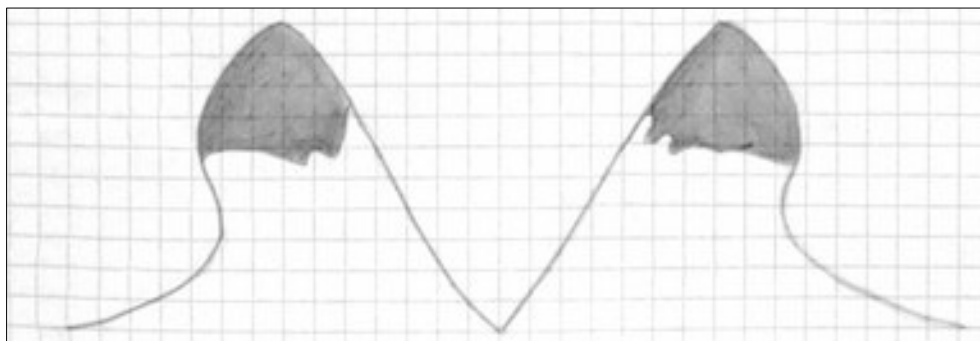

**Description:** Male; 3.5 feet.

**Sessions attended:** 203

## Shark 296

nickname:

*Arcturus*

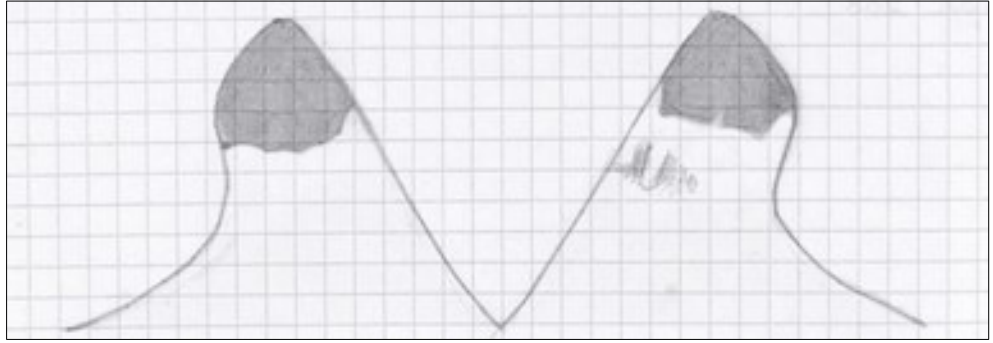

**Description:** Male; 4 feet, gold.

**Sessions attended:** 204, z57

## Shark 297

nickname:

*Ariane*

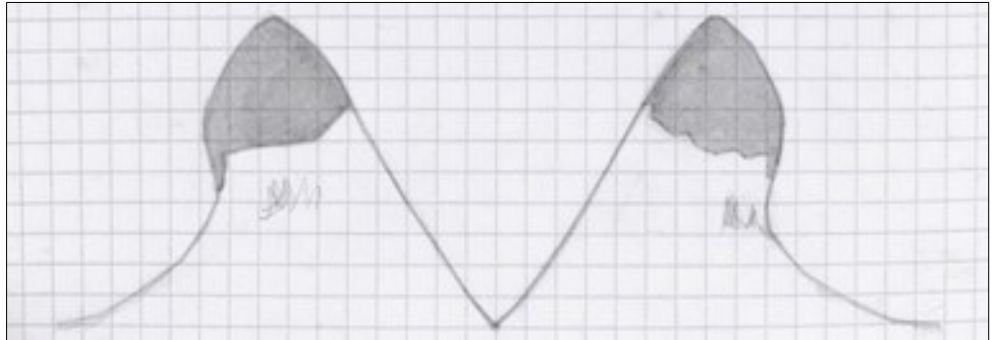

**Description:** Female; 4 feet. Large, faint, oblong light mark left side.

**Sessions attended:** 205, 206, 208, 210, 211, 217, 219, 230-233, 245

**Comments:** mated 1 to 2 weeks before 230; so around beginning of February.

## Shark 298

nickname:

*Rowan lookalike*

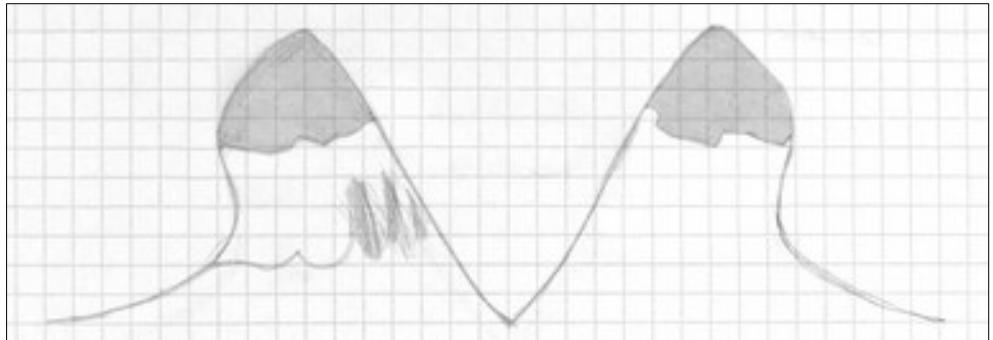

**Description:** Female; 5.5 feet.

**Sessions attended:** B20

## Shark 299

nickname:

*Marianna too*

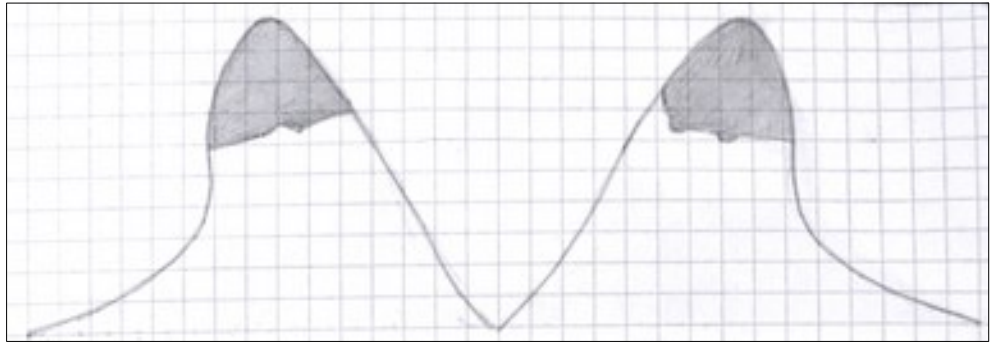

**Description:** Female; 5 feet, medium grey.

**Sessions attended:** B1

**Comments:** Passed repeatedly into view in the distance, finally came close enough to draw after half an hour. She was the only adult shark who came to that first Section B session and was apparently a rare visitor for I never saw her again.

## Shark 300

nickname:

*Charlotte*

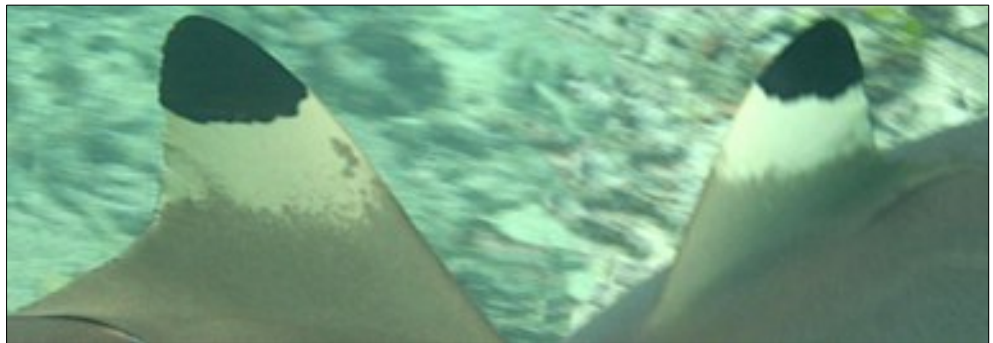

**Description:** Female; 5 feet, mid brown.

**Sessions attended:** z64

**Comments:** Pregnant

## Shark 301

nickname:

*Annalee*

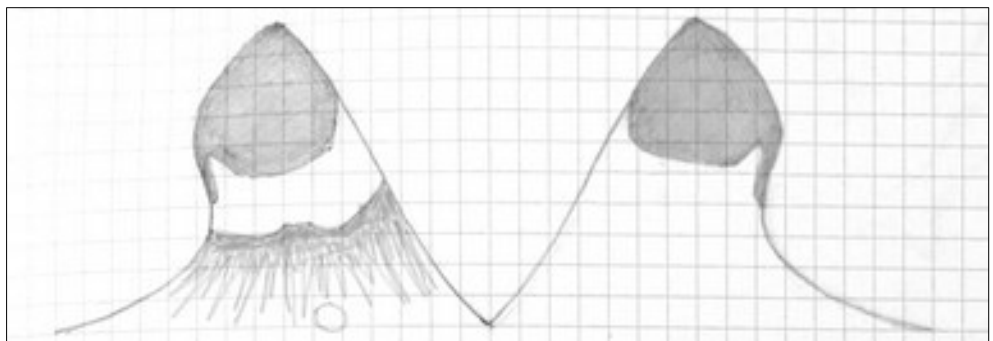

**Description:** Female; 4.5 feet. Light dot base dorsal fin right side.

**Sessions attended:** Z64

## Shark 302

nickname:

*Tamarack lookalike*

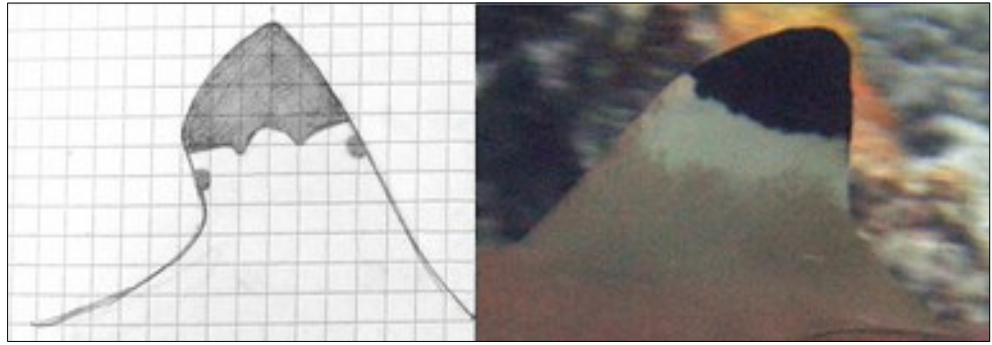

**Description:** Female juvenile; 3.5 feet, bronze.

**Sessions attended:** z64

## Shark 303

nickname:

*Antigone lookalike*

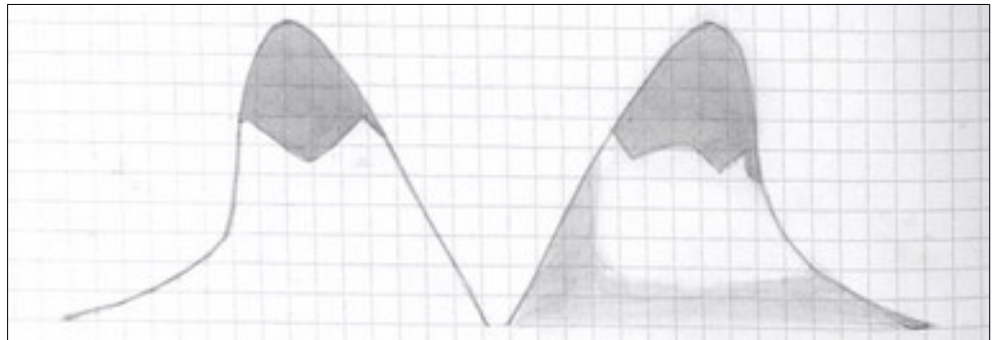

**Description:** Male; pale gold.

**Sessions attended:** O2

## Shark 304

nickname:

*Lissajous*

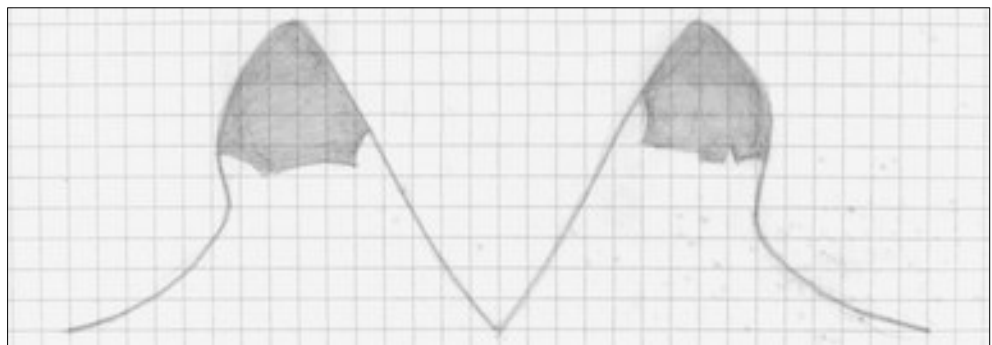

**Description:** Female; 3 feet, bronze.

**Sessions attended:** 206, 207

### **Shark 305**

nickname:

*Mayrie*

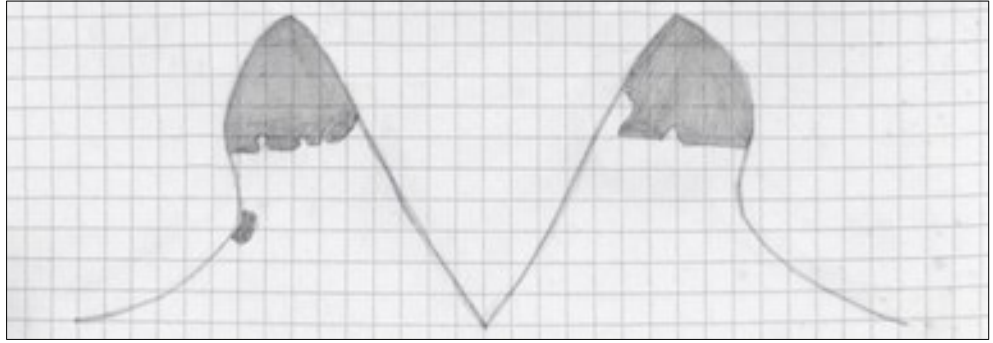

**Description:** Female; 5.5 feet, medium grey brown.

**Sessions attended:** 207, 214

**Comments:** Pregnant.

### **Shark 306**

nickname:

*Cauchy*

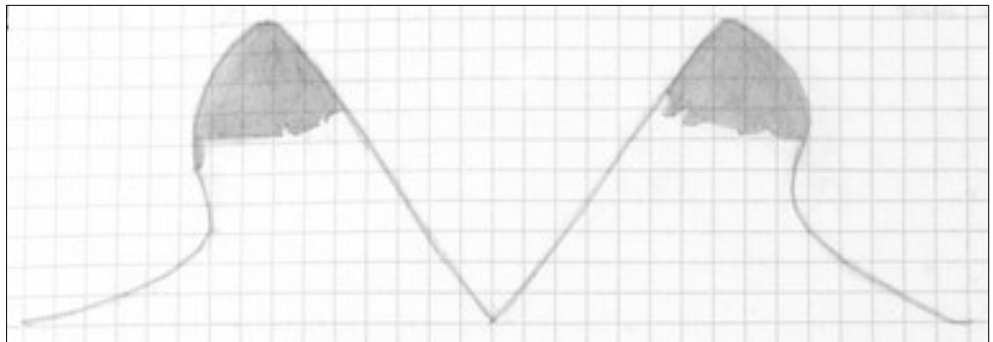

**Description:** Male; 3.5 feet, medium grey.

**Sessions attended:** 209

### **Shark 307**

nickname:

*Ellalee*

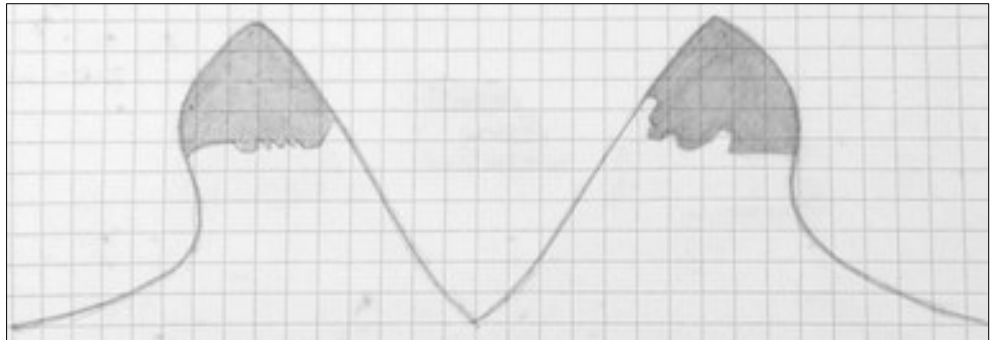

**Description:** Female; 4.5 feet, bronze ochre.

**Sessions attended:** 209, 210



## Shark 308

nickname:

*Gwillim*

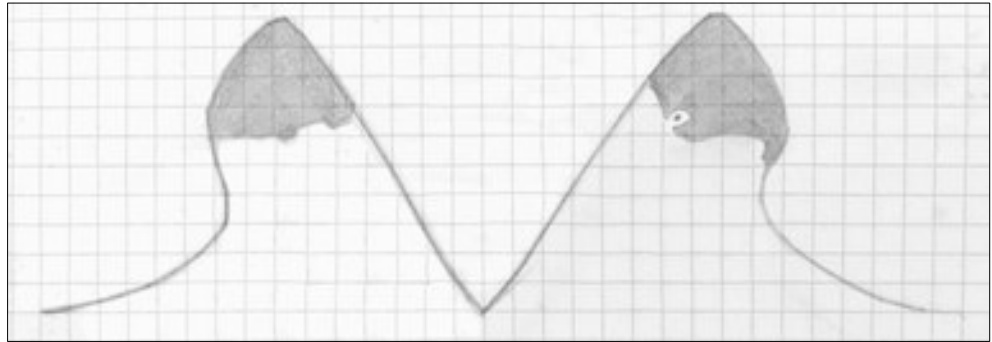

**Description:** Male juvenile; 3.5 feet.

**Sessions attended:** 209

## Shark 309

nickname:

*Victoria*

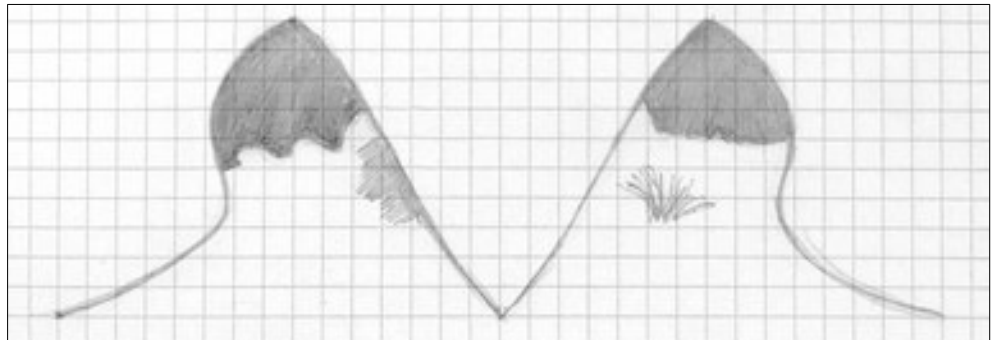

**Description:** Female; 6 feet, medium grey.

**Sessions attended:** 209, 230, 235, 245, 246, 247, B5, B19, B20, B24, 257, 259, 267, 279, 280, 295, 298

## Shark 310

nickname:

*Lochinvar*

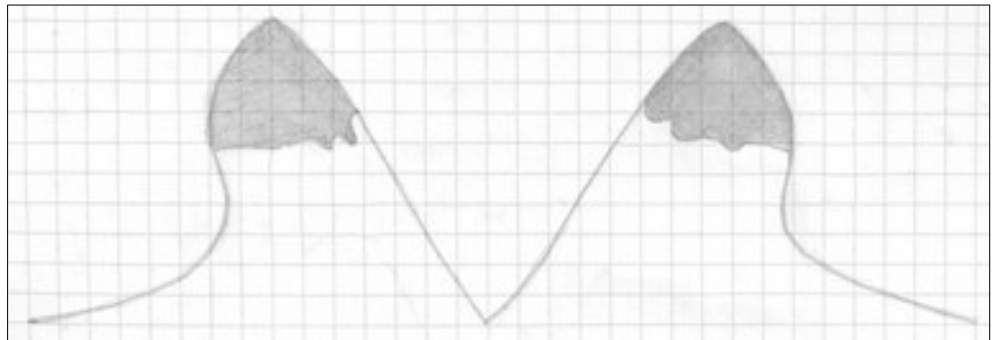

**Description:** Male; 4 feet, grey.

**Sessions attended:** 209

### Shark 311

nickname:

*Solace*

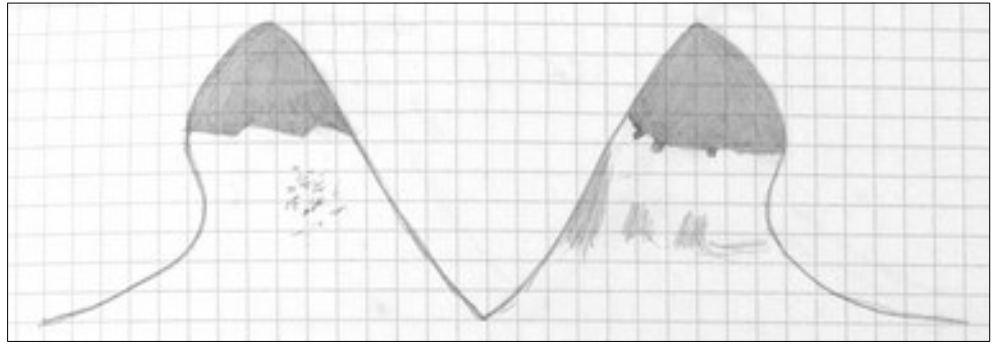

**Description:** Female; 5.5 feet, brown.

**Sessions attended:** C9, B7, B45

### Shark 312

nickname:

*Truffles*

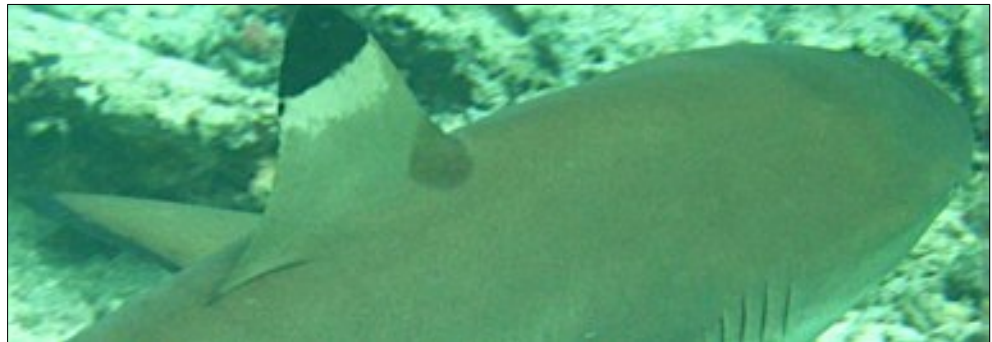

**Description:** Male; 4 feet, brown. Has a dark blotch on the lower leading edge of his dorsal fin. Tip lines right and left fairly straight.

**Sessions attended:** z64

### Shark 313

nickname:

*Tristram*

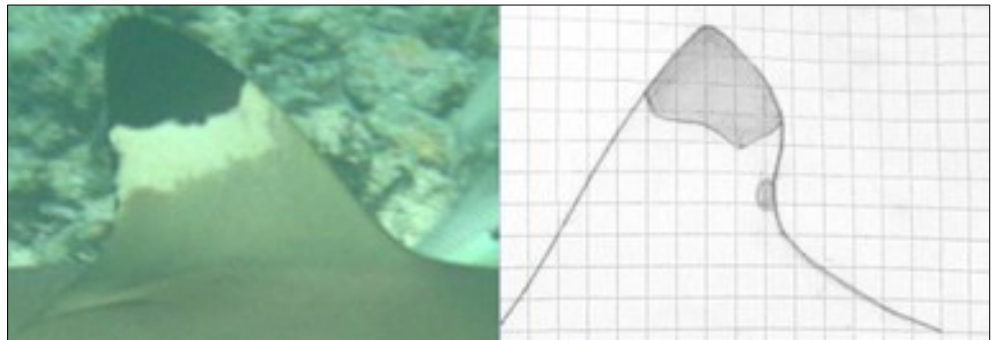

**Description:** Male; 4 feet, brown.

**Sessions attended:** 210, 211, 218

**Comments:** Seen hunting along the lagoon's border two nights before 210

### **Shark 314**

nickname:

*Brindy*

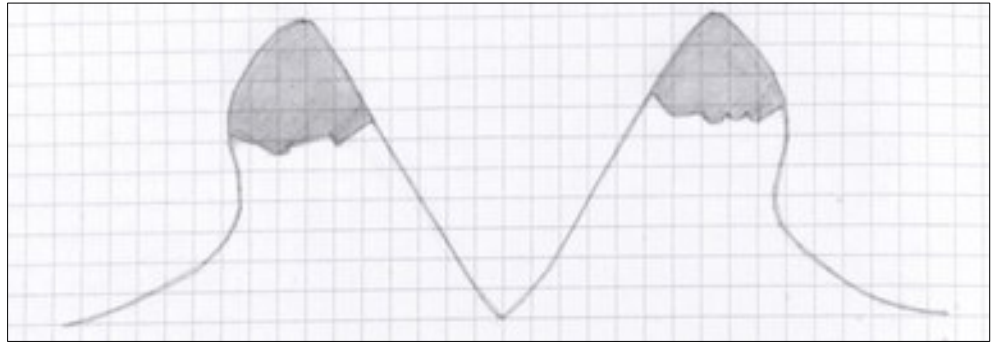

**Description:** Male juvenile; 3 feet, golden brown. Light dot left side in line with front of dorsal fin; left pectoral fin is oddly squared at the tip.

**Sessions attended:** 211, 213-215, 217-220, 222-228, 230, 231, 233, 234

### **Shark 315**

nickname:

*Jenny*

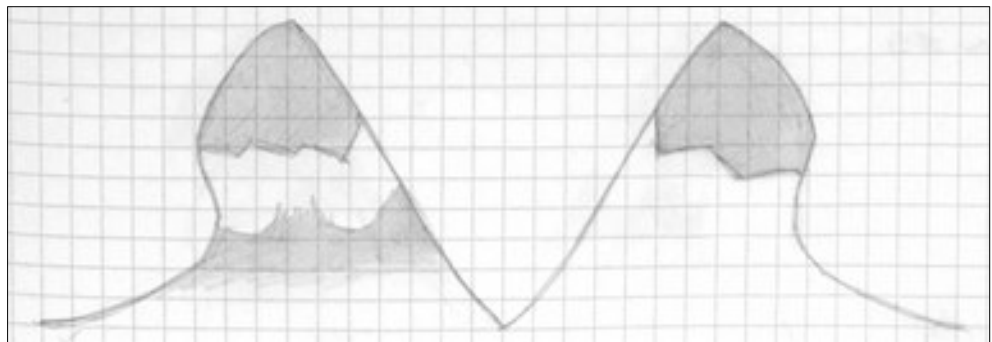

**Description:** Female; 6 feet, grey.

**Sessions attended:** B38

### **Shark 316**

nickname:

*Keeta look-alike*

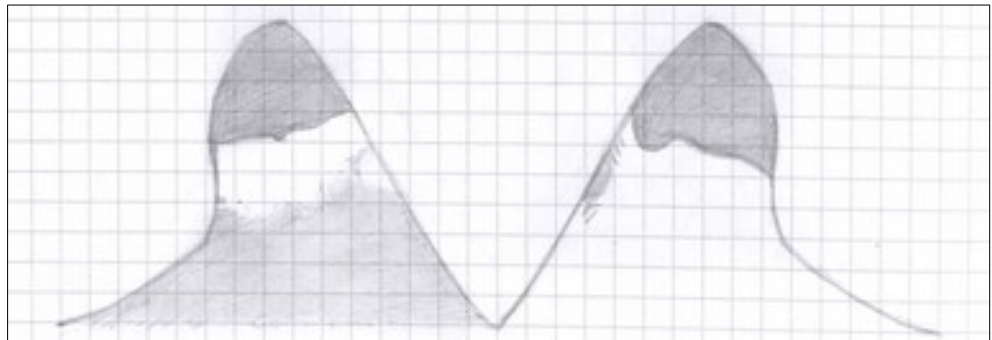

**Description:** Female; 6 feet, dark grey brown.

**Sessions attended:** O2

## Shark 317

nickname:

*Delaney*

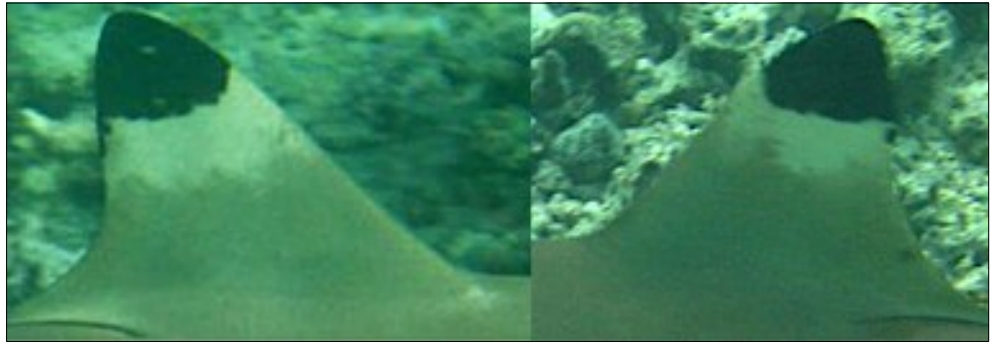

**Description:** Male; 3.5 feet, brown.

**Sessions attended:** z64, z66

## Shark 318

nickname:

*Hollywood*

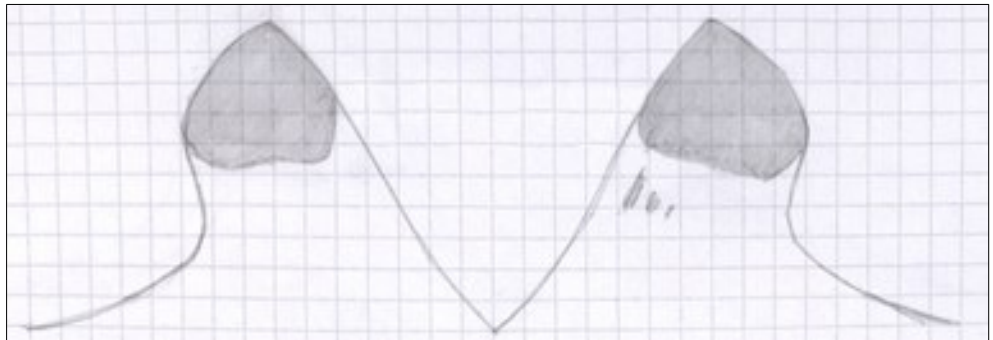

**Description:** Male; 4 feet, dark grey.

**Sessions attended:** B35

## Shark 319

nickname:

*Morgan*

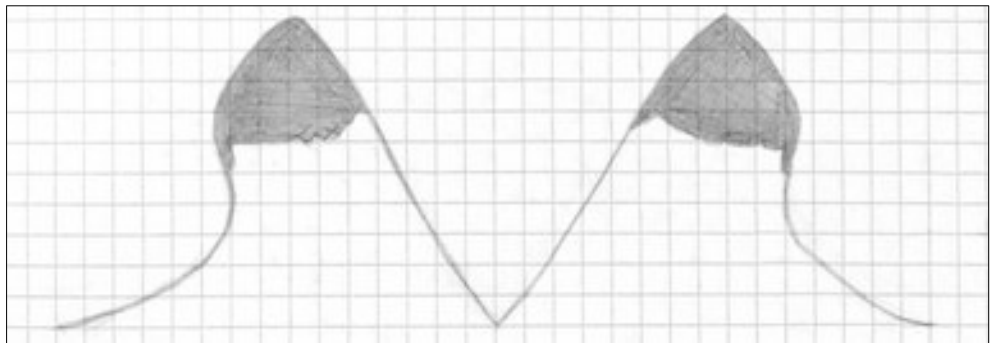

**Description:** Male; 4 feet, dark grey brown.

**Sessions attended:** 212

**Comments:** Came with Thrasher, never saw him again.

## Shark 320

nickname:

*Thrasher*

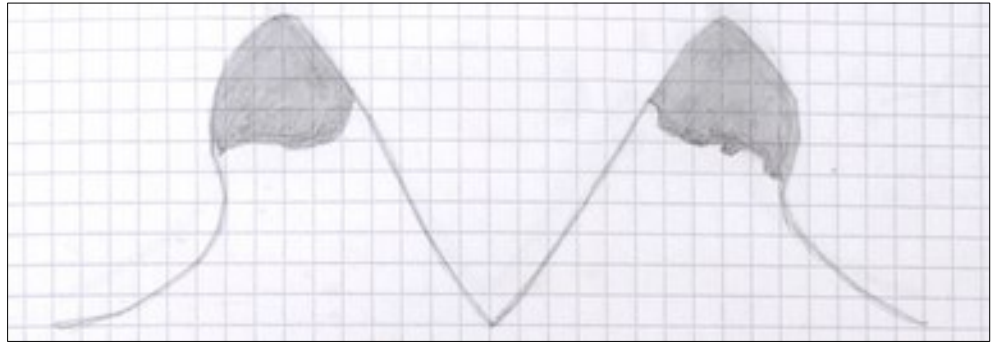

**Description:** Male; 4 feet, dark grey.

**Sessions attended:** 212, 225, B6, B11, B16, B25

**Comments:** Buddies with Morgan at 212, came with Becquerel at 225

## Shark 321

nickname:

*Langerin*

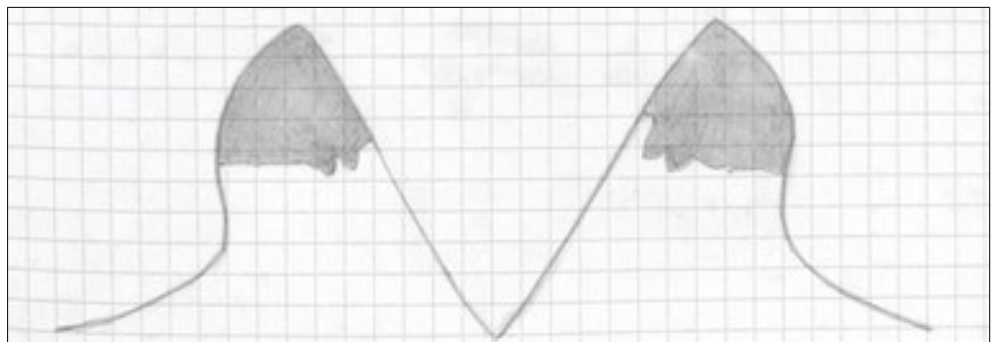

**Description:** Male; 4 feet.

**Sessions attended:** 213

**Comments:** Came with Blade apparently.

## Shark 322

nickname:

*Flit*

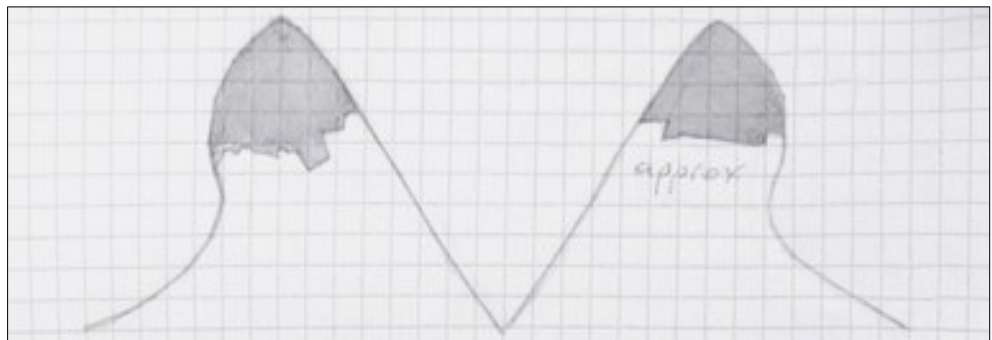

**Description:** Pup; 2 feet, bronze.

**Sessions attended:** 213, 215, 257

**Comments:** There, flitting around like a remora, at the surface at the start of 215! Could be Tricklet, born in Opunohu nursery last September, possibly Flora's or Gwendolyn's offspring.



### Shark 323

nickname:

*Corrina*

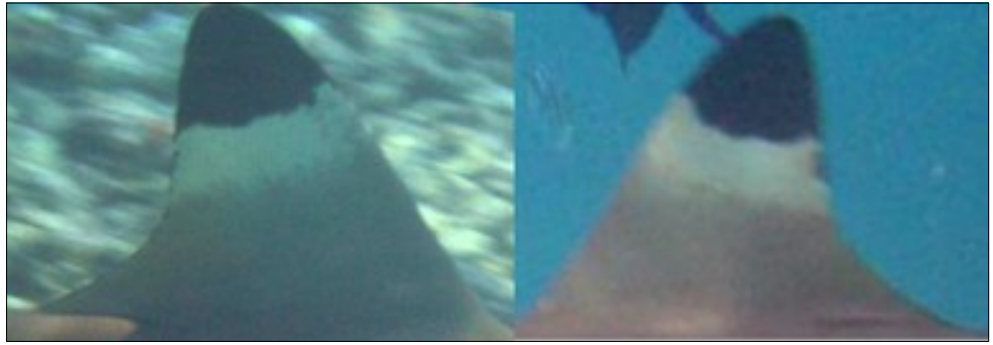

**Description:** Female; 5 feet, brown.

**Sessions attended:** z55

### Shark 324

nickname:

*Pearl*

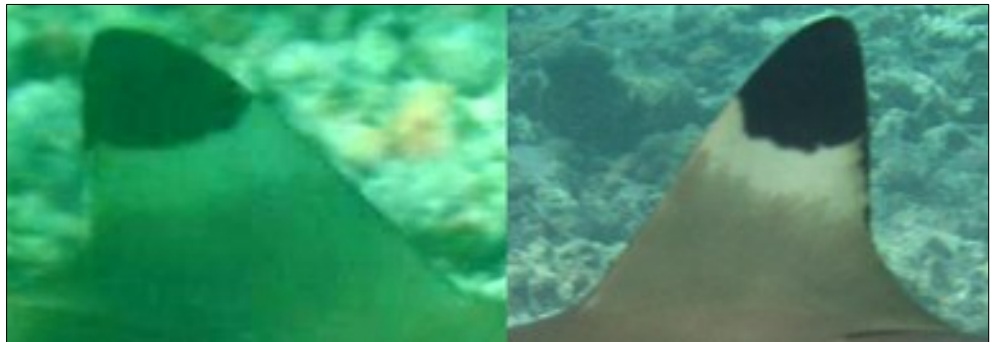

**Description:** Female juvenile; 3 feet, light brown.

**Sessions attended:** z54, z56, z57, z58, z60, z62, z63, z65, z66, z67

### Shark 325

nickname:

*Mirabelle*

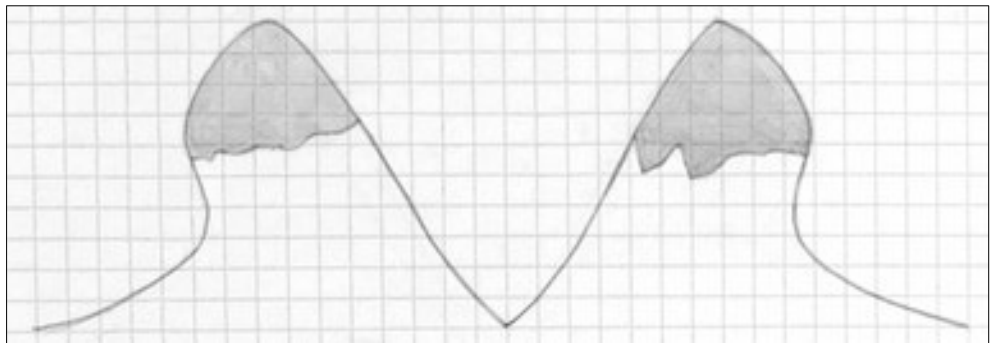

**Description:** Female; 5.5 feet.

**Sessions attended:** 214

## Shark 326

nickname:

*Chasles*

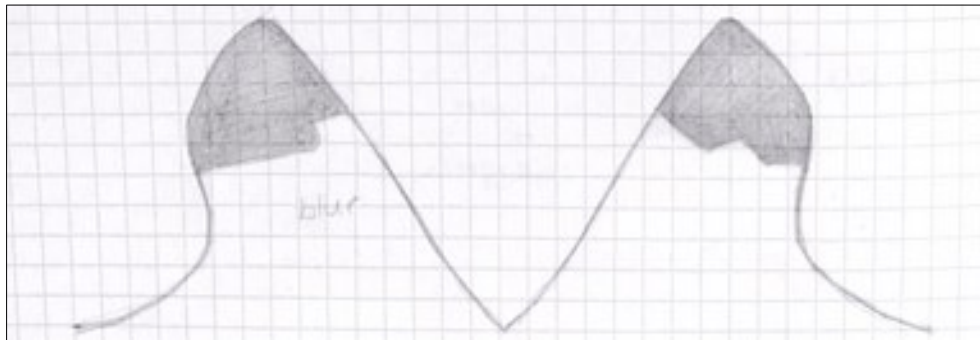

**Description:** Male; 3.5 feet light brown.

**Sessions attended:** z54, z56, z57, z58, z60, z62, z63, z65, z66, z67

## Shark 327

nickname:

*Janna*

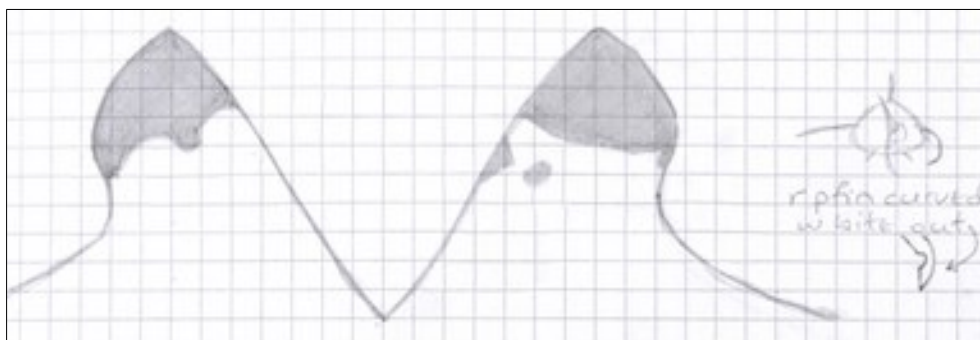

**Description:** Female; 5.5 feet, steel grey. Her right pectoral fin is curved down so far the tip is under her body and missing a bite-shaped section.

**Sessions attended:** 215

**Comments:** Arrived and began charging and orbiting me fast until I had to retreat to the kayak; I had to charge her myself, just to get her to back off enough so that I could get in. She was slender as a snake and covered in mating wounds just a couple of days old, which may have affected her demeanour. She must have been travelling for I never saw her again.

## Shark 328

nickname:

*Bliss*

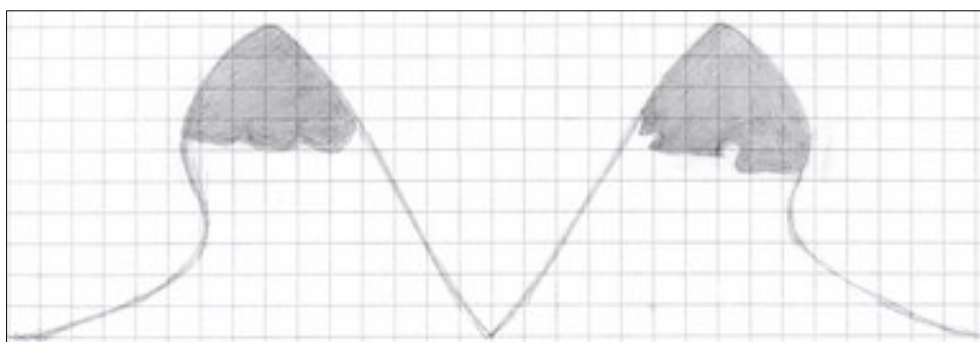

**Description:** Female; 5 feet, light grey.

**Sessions attended:** 216

**Comments:** Roaming Section A with Shilly on the morning of December 7, 2001.

### Shark 329

nickname:

*Fresnel*

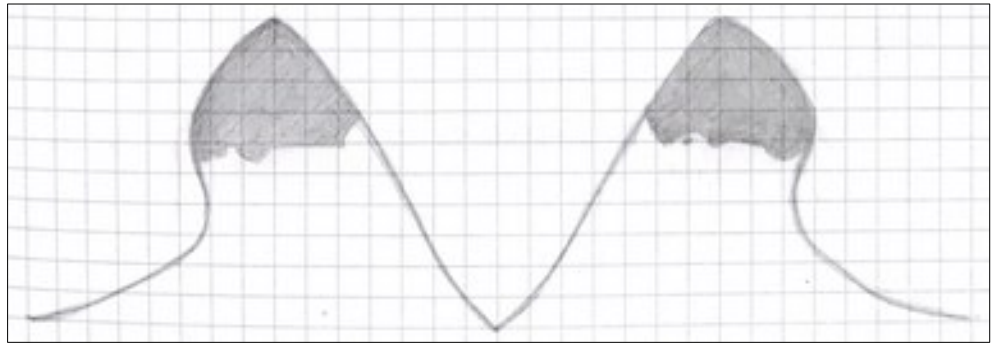

**Description:** Male; 4 feet, grey.

**Sessions attended:** 217

**Comments:** Would have thought it was Ramone from tip drawings, but though he hung around for a long time I could see no abnormality in his tail—it looked perfect.

### Shark 330

nickname:

*Magdalena*

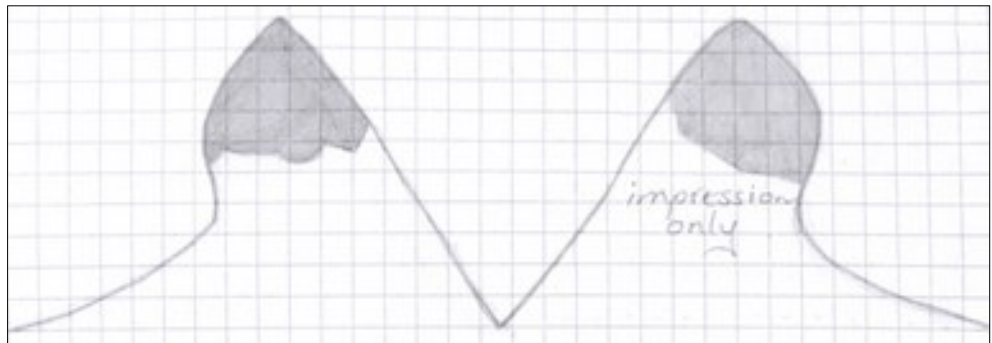

**Description:** Female; 6 feet, grey.

**Sessions attended:** 217

### Shark 331

nickname:

*Arjuna*

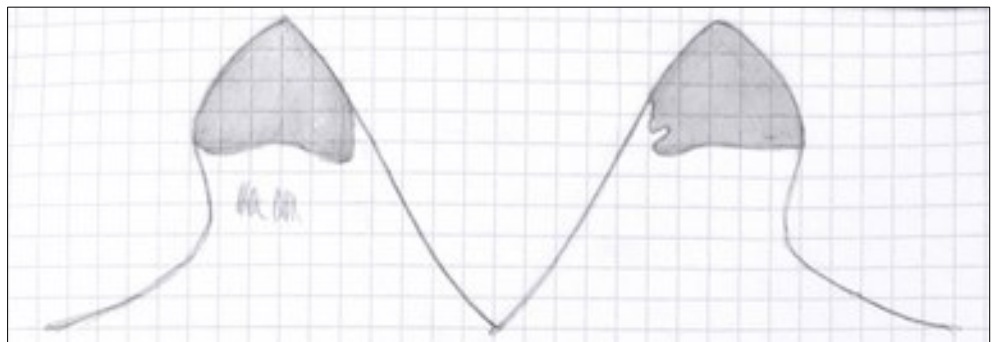

**Description:** Female; 4.5 feet, light brown.

**Sessions attended:** 218, 269, 270

**Comments:** mated one to two weeks before 218.

## Shark 332

nickname:

*Junelight*

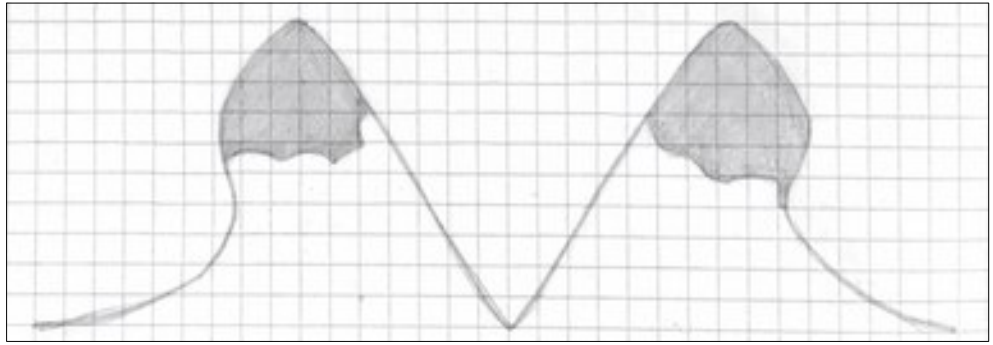

**Description:** Female; 4.5 feet, light brown.

**Sessions attended:** 218

**Comments:** Possible sighting at 282

## Shark 333

nickname:

*Tbrush*

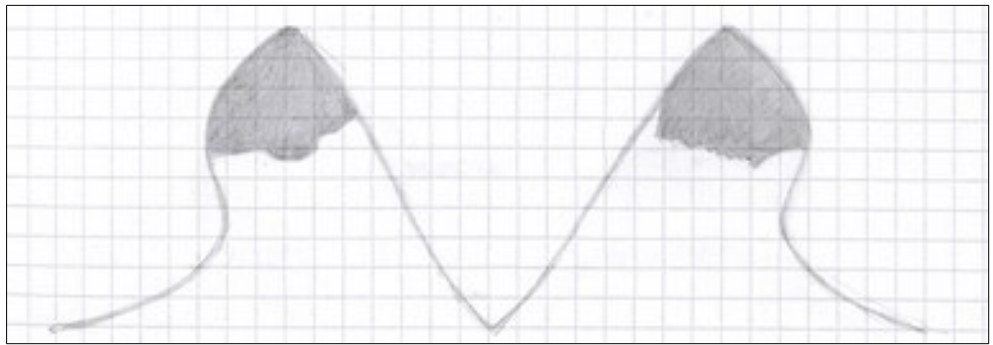

**Description:** Pup; 2 feet.

**Sessions attended:** 218, a19, 257

**Comments:** Born in nursery, Opunohu, November, 2001.

## Shark 334

nickname:

*Troy*

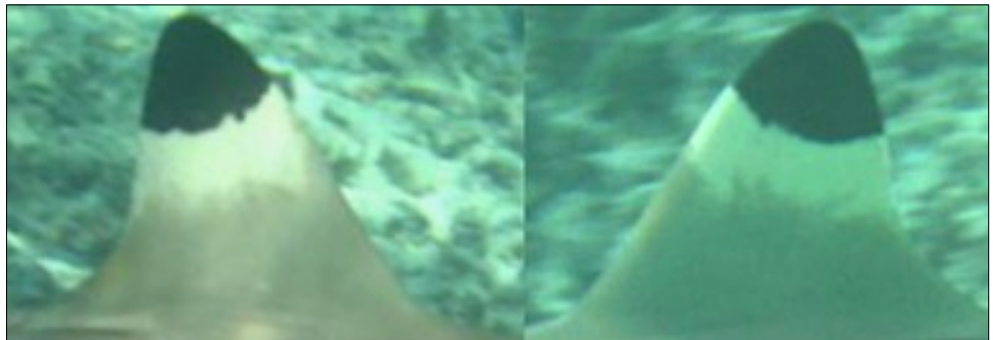

**Description:** Male; 3.5 feet, light brown.

**Sessions attended:** z66

### Shark 335

nickname:

*Ophelia*

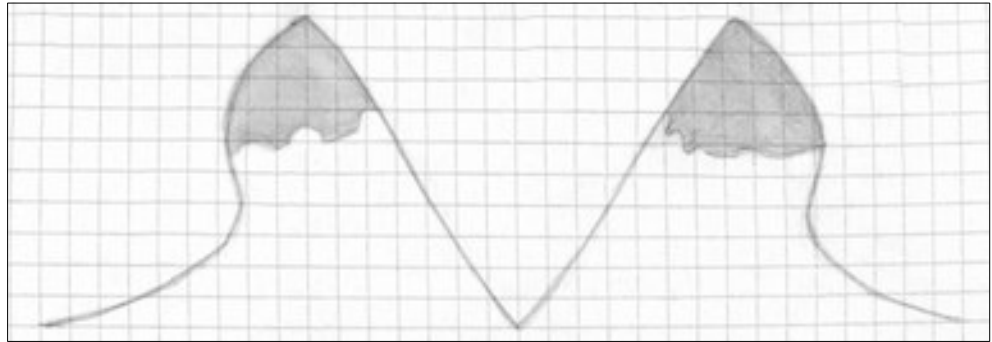

**Description:** Female; 5 feet.

**Sessions attended:** 219

**Comments:** Mating wounds 1 to 2 weeks old at 219, Jan 4<sup>th</sup>, 02.

### Shark 336

nickname:

*Mandlebrot*

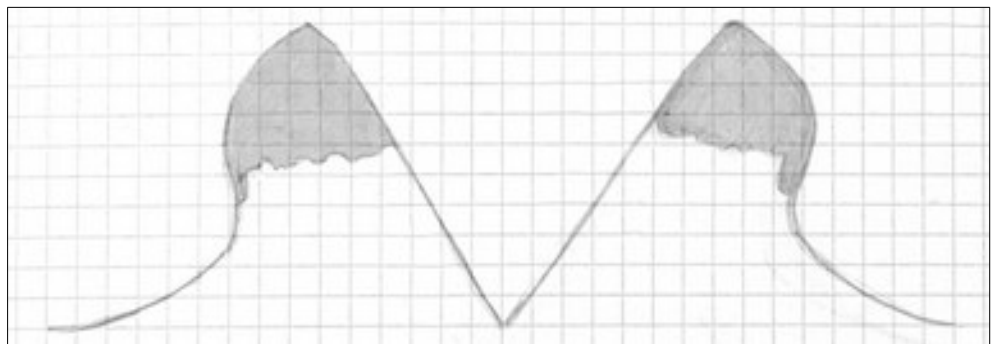

**Description:** Male; 4 feet, grey. Dark shark, dark fin.

**Sessions attended:** 219

### Shark 337

nickname:

*Chimera-too*

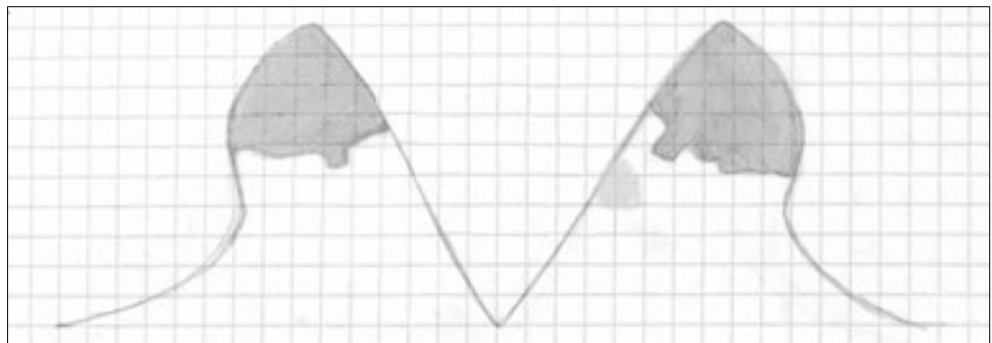

**Description:** Female; 6 feet, light brown.

**Sessions attended:** 223



### Shark 338

nickname:

*Bequerel*

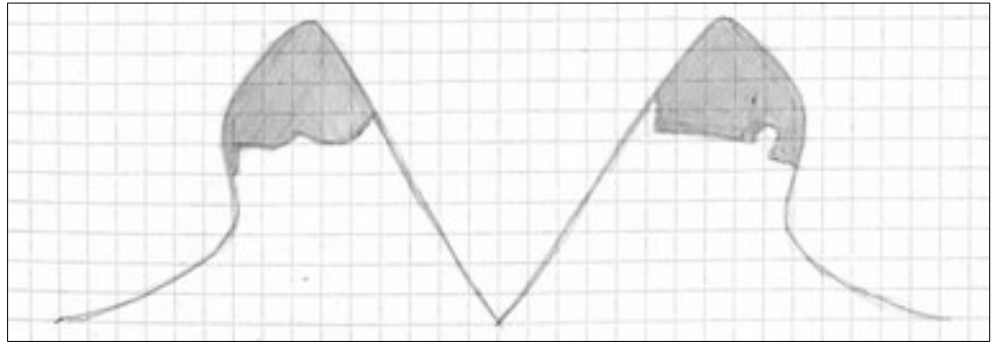

**Description:** Male; 4 feet.

**Sessions attended:** 218

### Shark 339

nickname:

*Coulomb*

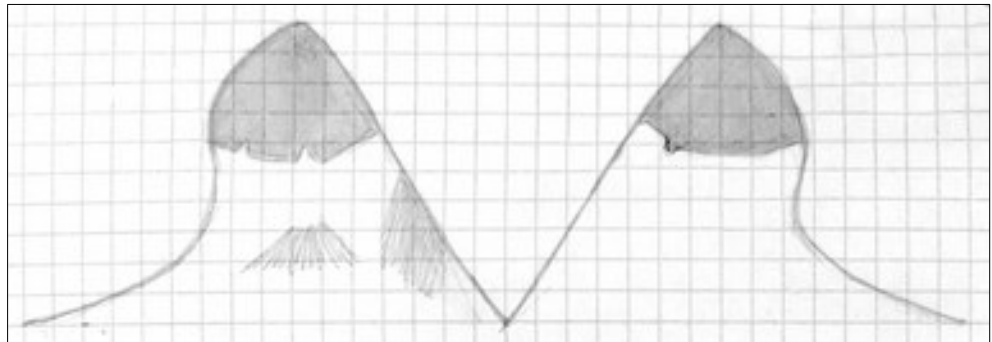

**Description:** Male; 4 feet. Dark grey in December

**Sessions attended:** 225, z33, 267

**Comments:** These males all were identified on coming into the site as night fell during the reproductive season, presumably to mate with the females who had attended the session and who frequently returned to undulate among them.

### Shark 340

nickname:

*Santana*

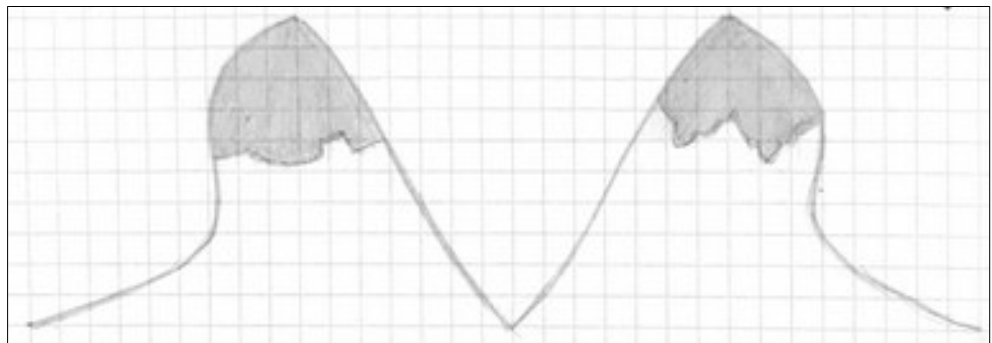

**Description:** Male; 4.5 feet. A big male.

**Sessions attended:** 227

### **Shark 341**

nickname:

*Xavien*

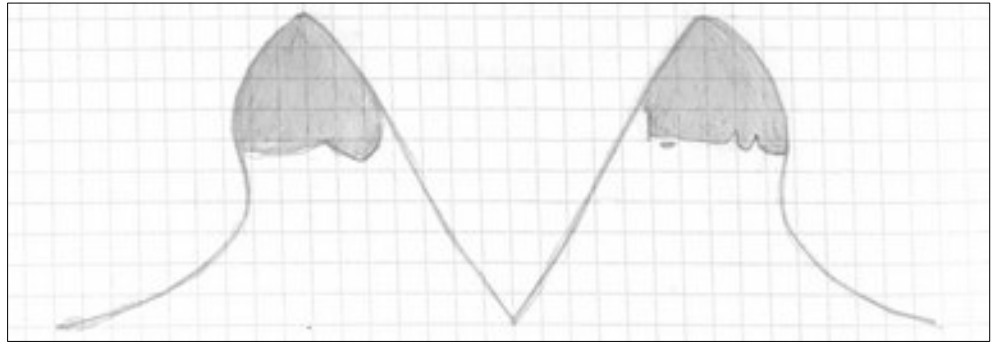

**Description:** Male; 3.5 feet, light brown.

**Sessions attended:** 230

### **Shark 342**

nickname:

*Pasha*

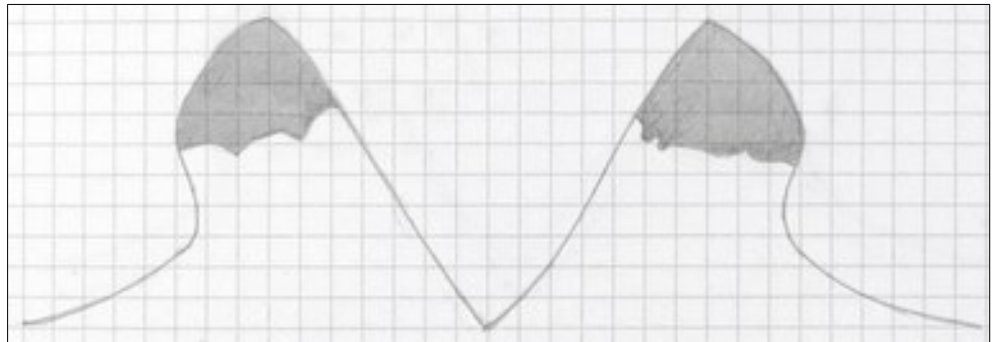

**Description:** Juvenile; 2.5 feet. Two light circles on back behind dorsal fin, 1.5 cm across, more elsewhere.

**Sessions attended:** B8

### **Shark 343**

nickname:

*Bessie*

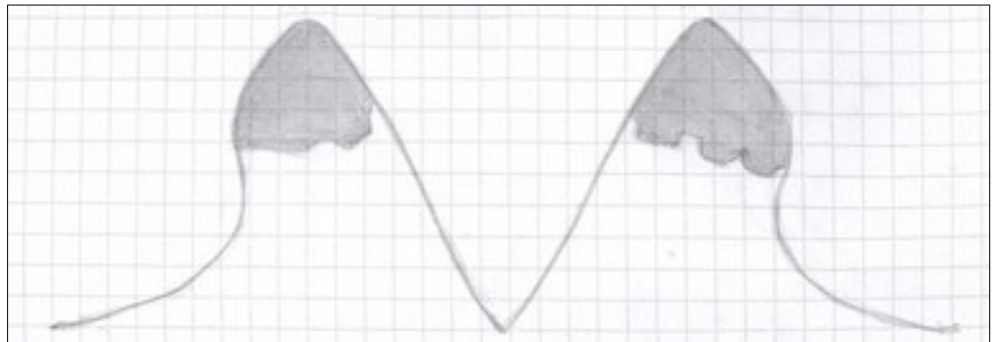

**Description:** Female; 5.5 feet, light ochre.

**Sessions attended:** 231

**Comments:** Curious creature circled closely around me while I drew her fin. Mated in last 4 days maximum, so between February 11 and 15th, 02.

### **Shark 344**

nickname:

*Mio*

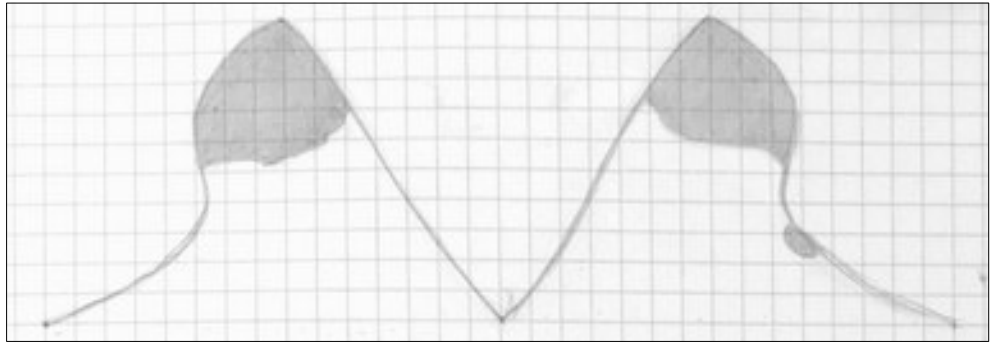

**Description:** Male; 4 feet.

**Sessions attended:** 231

### **Shark 345**

nickname:

*Portia*

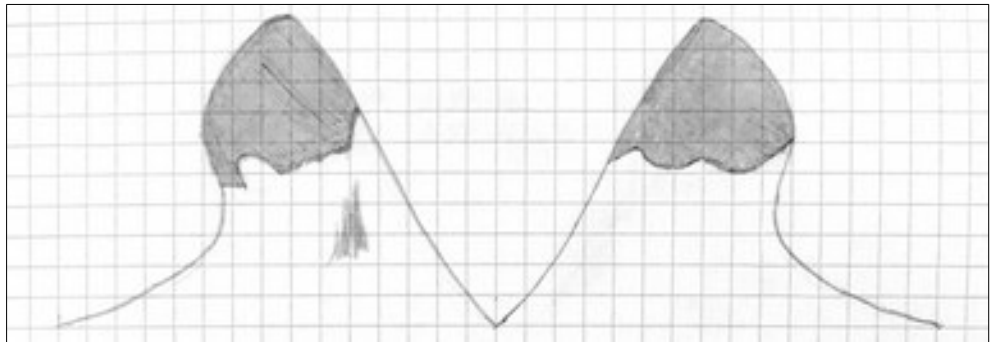

**Description:** Female; 4 feet.

**Sessions attended:** E2, E3, E4

### **Shark 346**

nickname:

*Brendan*

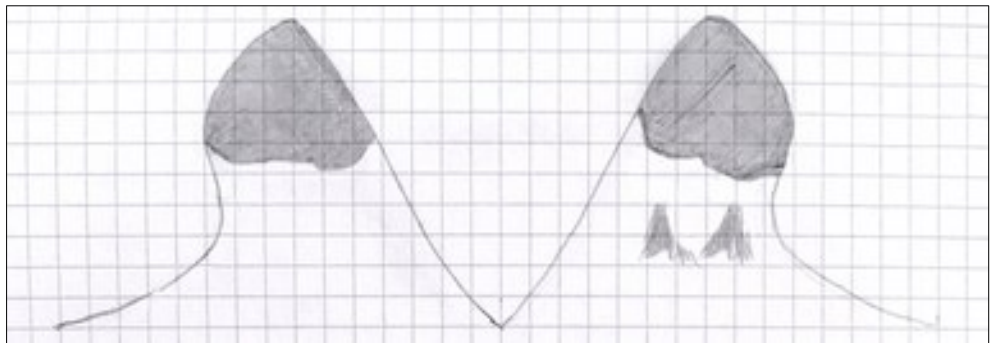

**Description:** Male juvenile; 3.5 feet.

**Sessions attended:** E2, E4

## Shark 347

nickname:

*Cotlet*

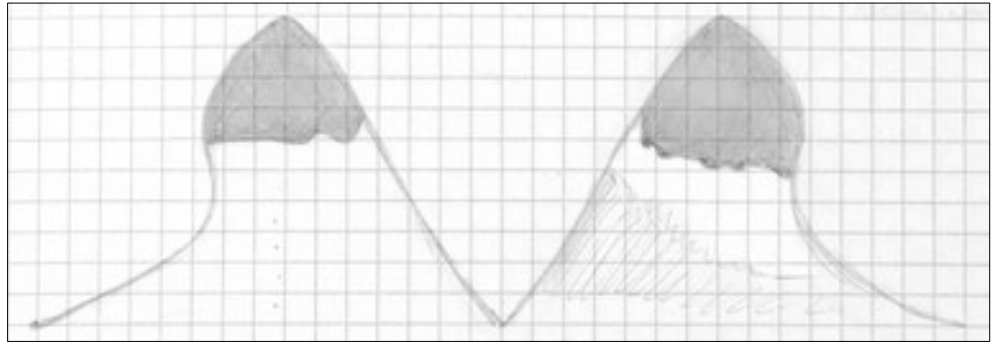

**Description:** Female; 3.5 feet, light brown, becoming darker grey-brown with maturity..

**Sessions attended:** B1, 234, 239, 243-247, B3-6, B8-11, B13, B15, B17, B18, B19, B21, B25, z32, B28, B29, B31, B32, B34, z35, B35-39, 260, B40, B41, B43-45, 265, 266, 267, 270, 280-283, 285, 288, 290-292, z41, 295-297, z54, z60, z61

**Comments:** Seen in section B two years before she came to site, at B1. Later sessions showed that section B was her home range, but that she roamed from it.

## Shark 348

nickname:

*Jacaranda*

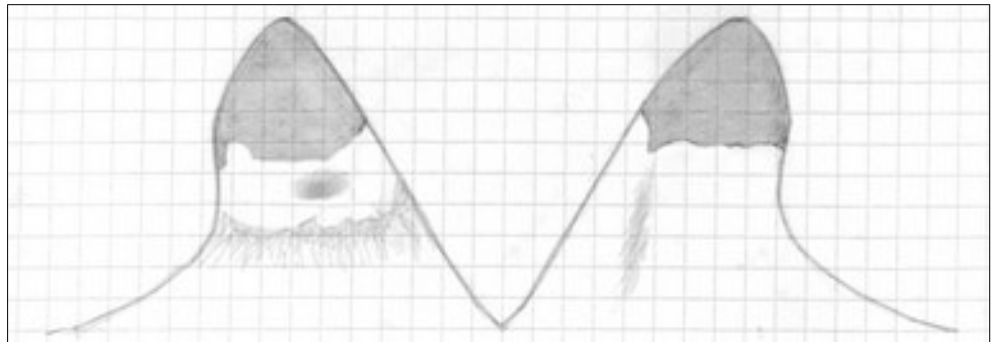

**Description:** Female; 3.5 feet.

**Sessions attended:** E2, E4

## Shark 349

nickname:

*Poincaré*

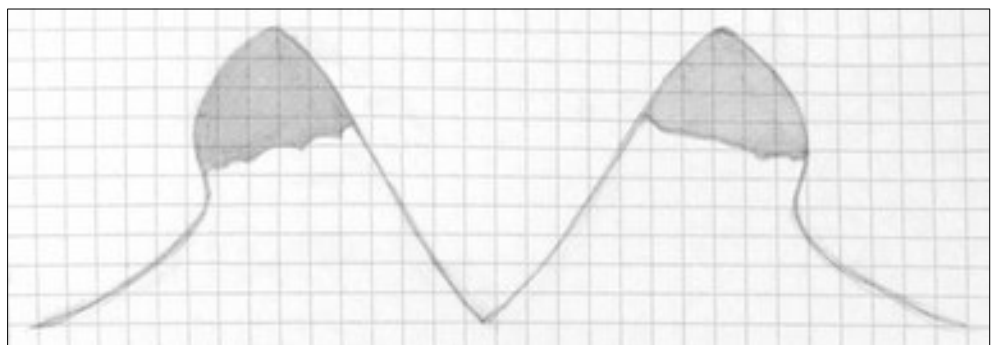

**Description:** Male; 4 feet.

**Sessions attended:** 235

## Shark 350

nickname:

*Pliny*

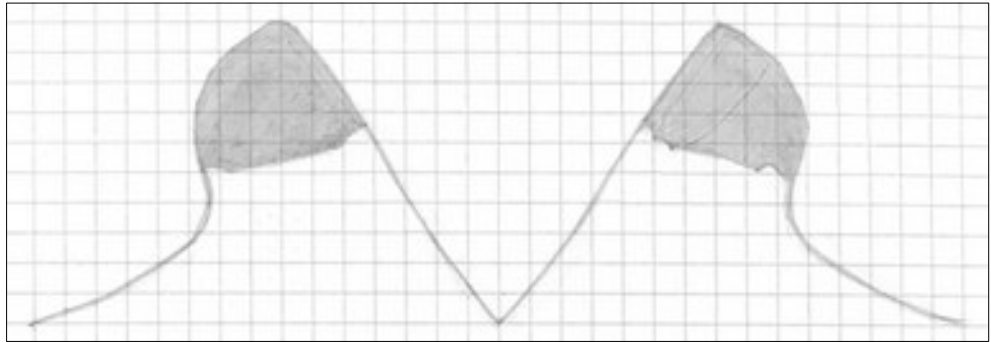

**Description:** Pup; 2 feet, bronze.

**Sessions attended:** 238, 240, 247

## Shark 351

nickname:

*Cheyenne*

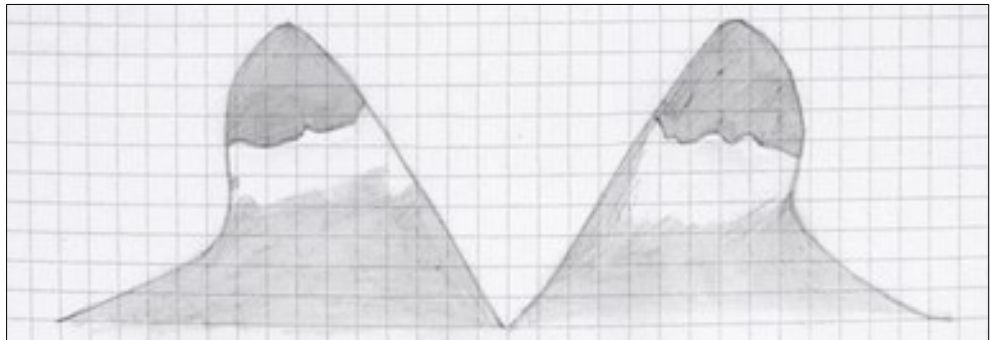

**Description:** Female; 6 feet, grey.

**Sessions attended:** C1, C2, C4, C7, C8, C9, 239, 245, B4, B5, B7-10, B19-21, B23, 257, B40, B42, B44, 266, 267, 281, 282, 285, 287-290, 292, 295, 298, 299, 305, z54, z59, z60

**Comments:** Came to Section A with Odyssey and Clementine on her first visit, then began coming occasionally alone. She also accompanied them on some of their subsequent yearly visits. Possible association also with Concorde. Usual range mid-lagoon.

## Shark 352

nickname:

*Muffet*

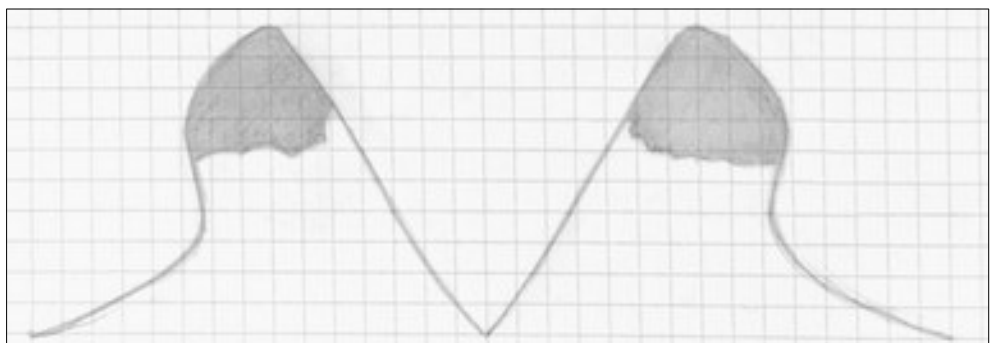

**Description:** Female; 3.5 feet, light brown.

**Sessions attended:** 240, 242, z47



### Shark 353

nickname:

*Cygnets*

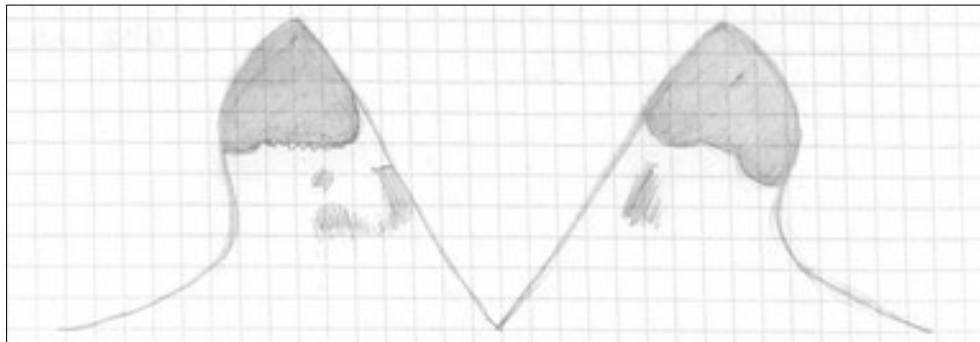

**Description:** Pup; 2.5 feet, bronze.

**Sessions attended:** 241, 244, B4-11, B15-21, B26, B29, B32, B36, B41, B44, 267, z41, 298

**Comments:** Regularly appearing at A, B, and z sessions, which none of the adults did; the juveniles roamed widely.

### Shark 354

nickname:

*Filly*

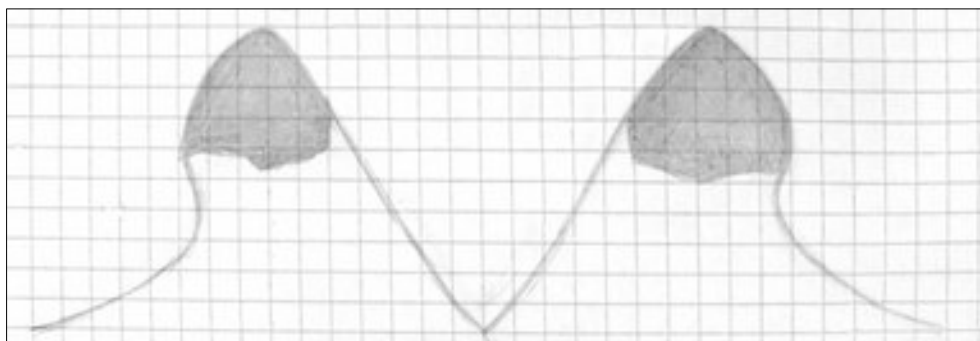

**Description:** Female juvenile; 3 feet, brown.

**Sessions attended:** 241, 243, 245, 246

### Shark 355

nickname:

*Pepita*

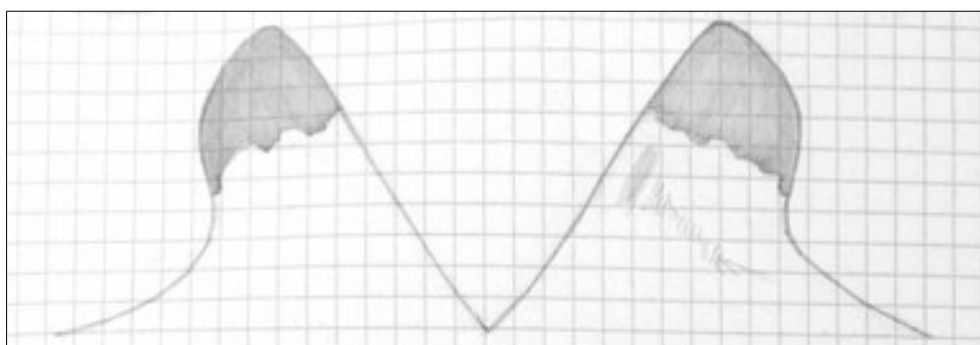

**Description:** Juvenile female; 3.5 feet.

**Sessions attended:** C10

**Comments:** Veered away each time. Came with Tuvalu to Site C—only time any juvies appeared there.

## Shark 356

nickname:

*Tuvalu*

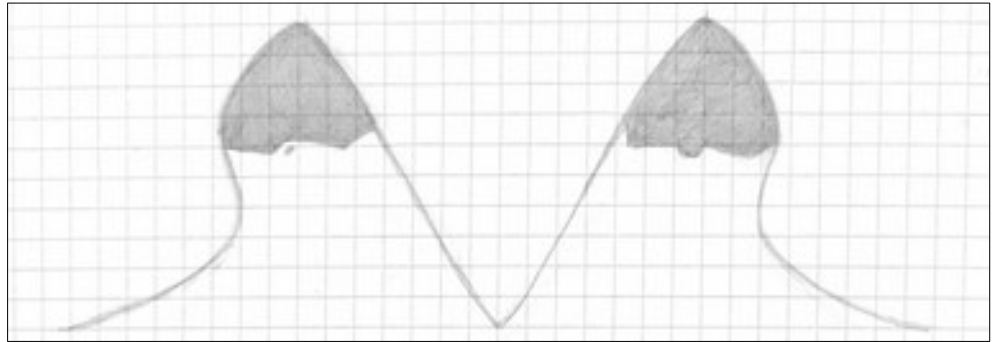

**Description:** Juvenile male; 3 feet when first identified, ochre.

**Sessions attended:** C10, B5-7, B9, B10, B11, B15, B17-20, A256, B22-25, B27, B31, B33-35, B37, B39-42, B44, B45, A265, A266, A269, A272, A279, A280

## Shark 357

nickname:

*Belladonna*

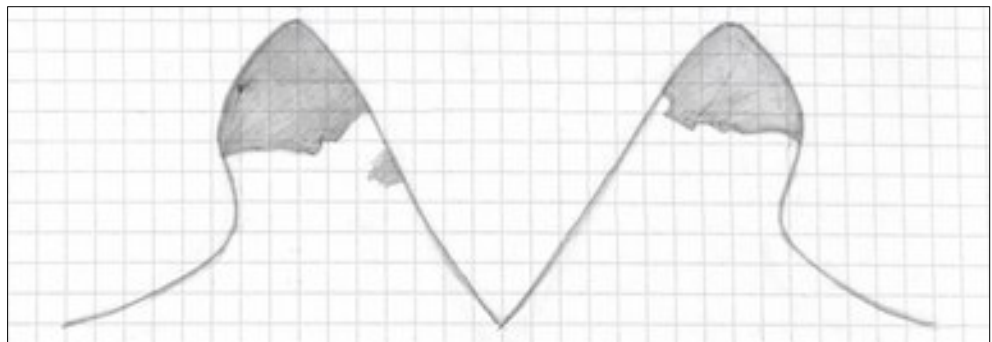

**Description:** Female; 6 feet, grey.

**Sessions attended:** B4, B5, B7, B8, B9, B10, B11, B16, B17, B39, B40, B42, B44, z63, z64.

**Comments:** The z sessions were in the barrens where sharks from B Section went to rest during the day, possibly explaining her presence in eastern Section A on those two occasions.

## Shark 358

nickname:

*Danny look-alike*

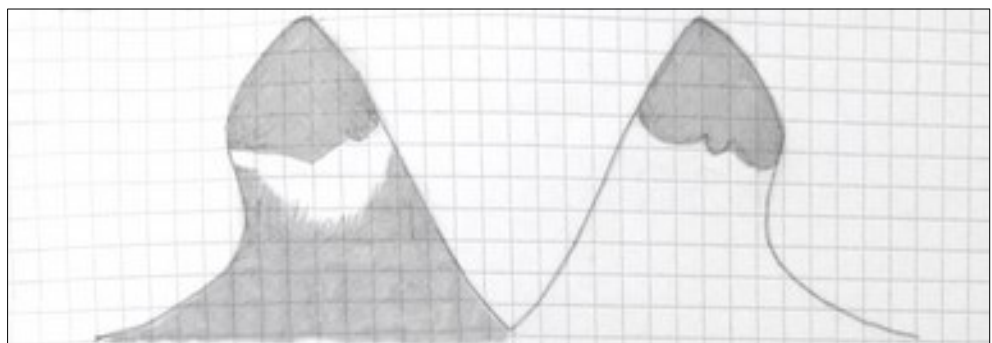

**Description:** Male; 4.5 feet, gold.

**Sessions attended:** O1, O2, O5

## Shark 359

nickname:

*Antigonetoo*

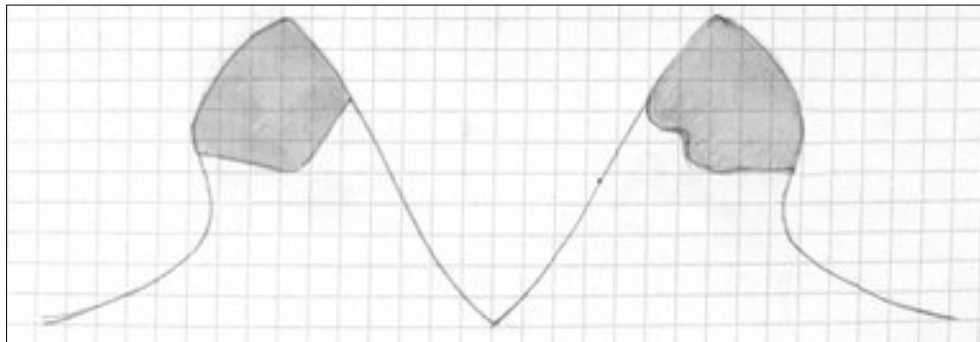

**Description:** Male; 4 feet. Two dots mid left side, one on tail tip. Beautiful big male, gold shark with graceful conformation, reminiscent of Antigone; fin tips similar.

**Sessions attended:** C11

## Shark 360

nickname:

*Glamorgan*

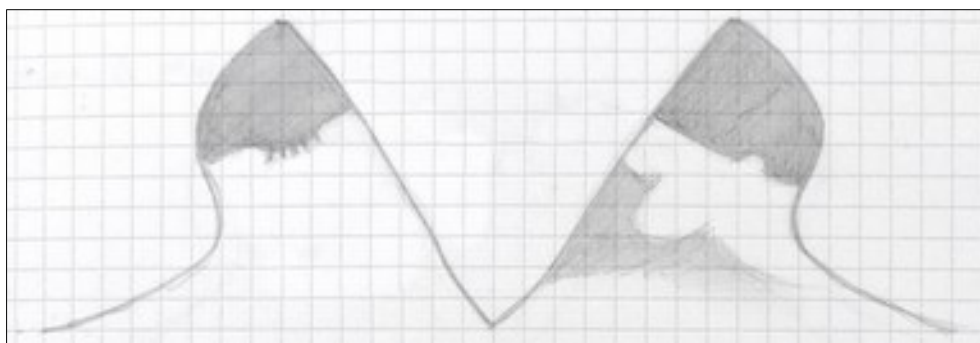

**Description:** Female; 5.5 feet, grey.

**Sessions attended:** A19, B6, z22, B17, B27, B28, B29, 269, 272, 282, 285, a30, 287, 288, 291, 293, z41, 295, z42, 296, 297, 298, z46, z55, z57, z58, z60, z61, z62, z64, z65, z67

**Comments:** Appeared for the first time with Barracuda and Tornado in the middle of the day in Section A. From there she proceeded slowly east, was seen in the barrens, then at site B. Home range unknown. Hook in front of mouth, going to the side by #300, Nov. 20<sup>th</sup>, 2004. Lost by 303, Dec. 11, 04.

## Shark 361

nickname:

*Carondolet*

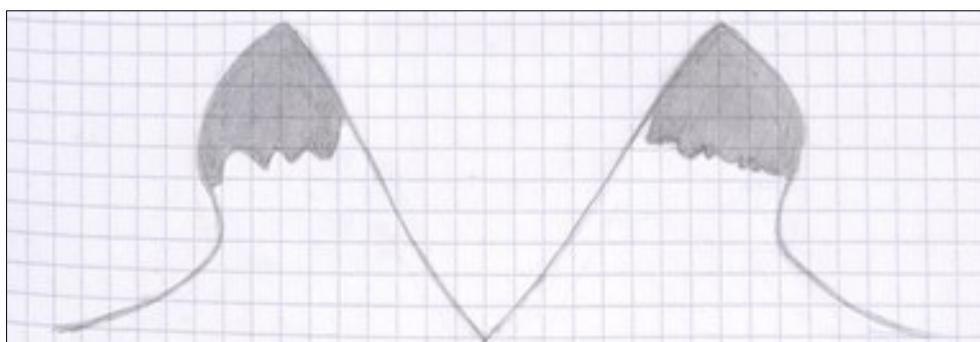

**Description:** Female; 6 feet, grey-brown.

**Sessions attended:** B4, B6, B13, B17

**Comments:** Shy

## Shark 362

nickname:

*Pinto*

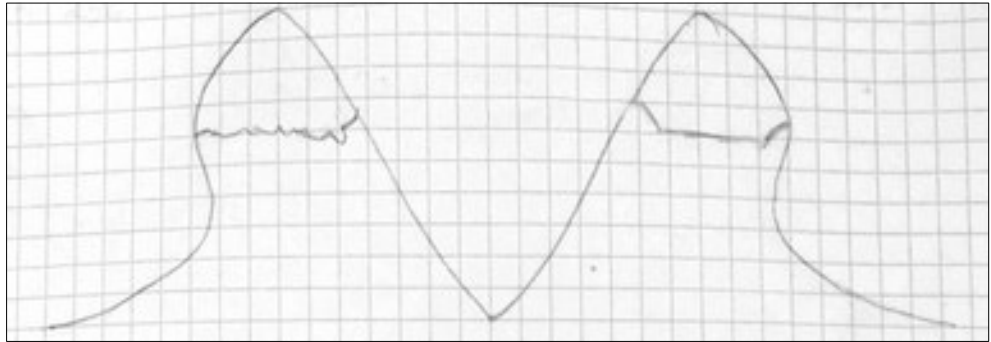

**Description:** Pup; 3 feet, bronze. Large black blotch 3" behind dorsal fin right side of back.

**Sessions attended:** B5, B8

## Shark 363

nickname:

*Pipkin*

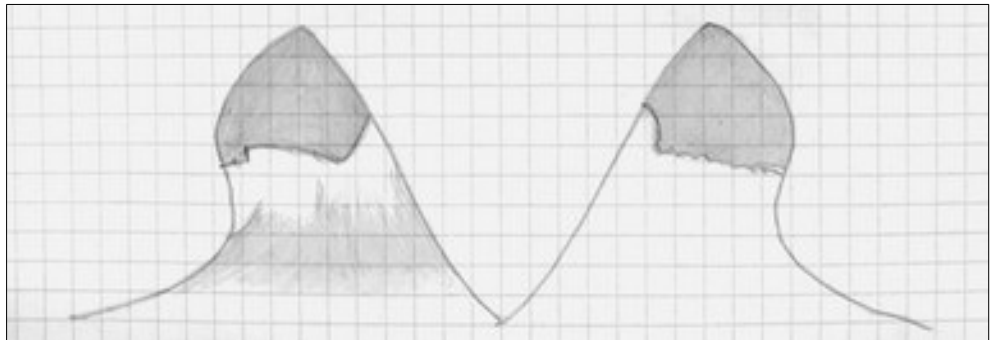

**Description:** Female; 3.5 feet, brown, and growing.

**Sessions attended:** A19, 265, 290-292, 296, z45, 298, 300, z55, z56, z57, z58, z59, z60, z63, z64, z65, z66

**Comments:** Pregnant in October, 04, first year. Emaciated at 300, but just fine at z55.

## Shark 364

nickname:

*Bluey*

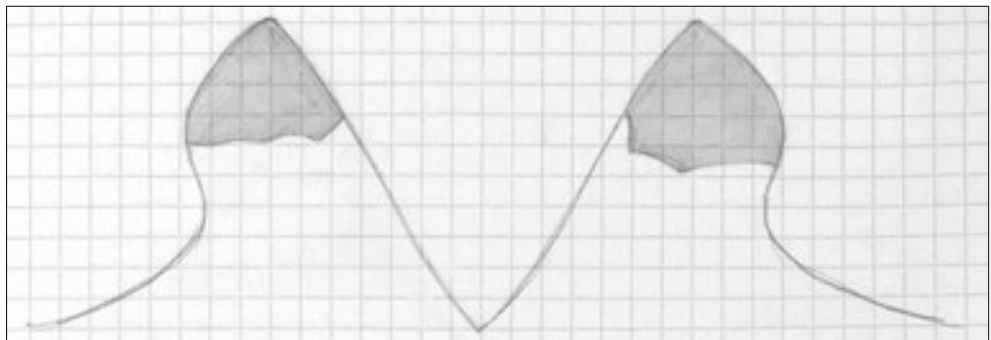

**Description:** Pup; 2 feet.

**Sessions attended:** B16, B17, B18, B19, B23, B24

## Shark 365

nickname:

*Tricklet*

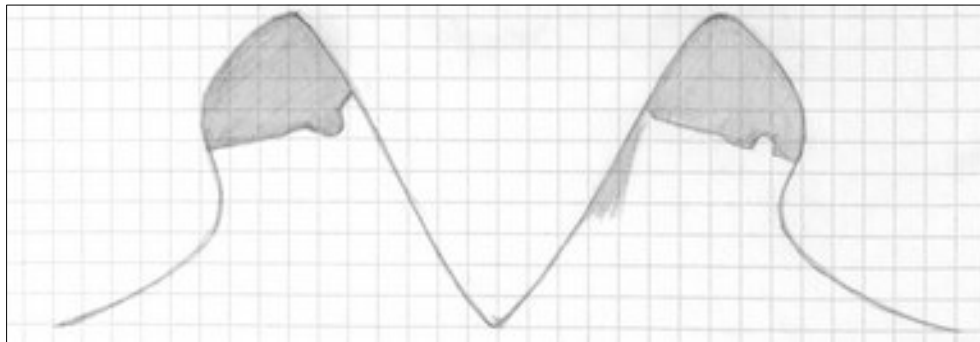

**Description:** Pup; 2 feet, bronze.

**Sessions attended:** 251

**Comments:** Born in Opunohu nursery in September, 01

## Shark 366

nickname:

*Gamelan*

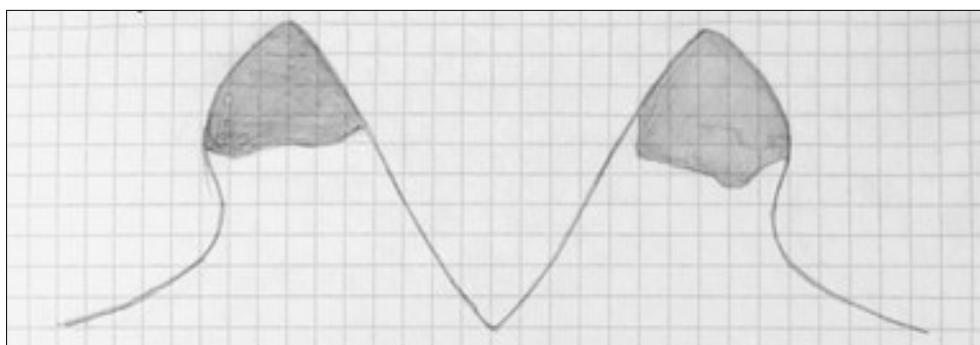

**Description:** Pup; 2 feet, bronze. Light mark on right side.

**Sessions attended:** z27, 288

**Comments:** Still a small pup at 288 (May 15/04). The drawing I did, though at z27, in Oct 02 was so accurate I have no qualms about id'ing him; it's probably a slow growing, tiny male like Trinket.

## Shark 367

nickname:

*Odetta*

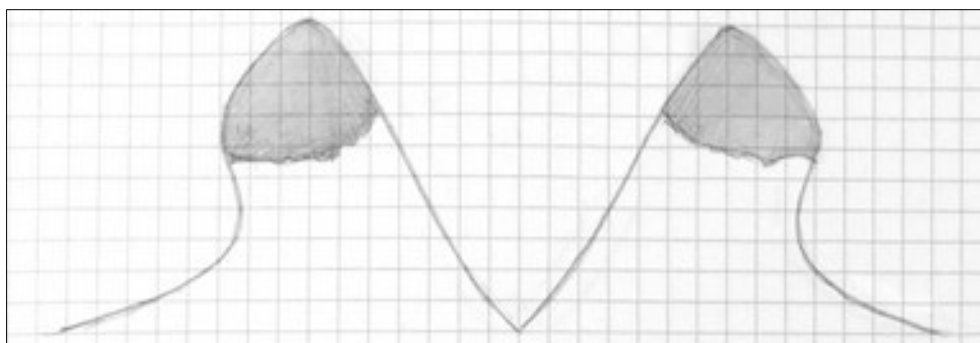

**Description:** Pup; 2.5 feet initially, grey

**Sessions attended:** a24, z30 z35, 259-262, 270-272, 278, z36, 279-289, z38, 290, 291, z40, 292, 293, 295, z42, z43, 296-300, 304, 305, z51, z53, z54, z55, z56, z57, z59, z60, z61, z62, z64, z65, z67



### Shark 368

nickname:

*Stirling*

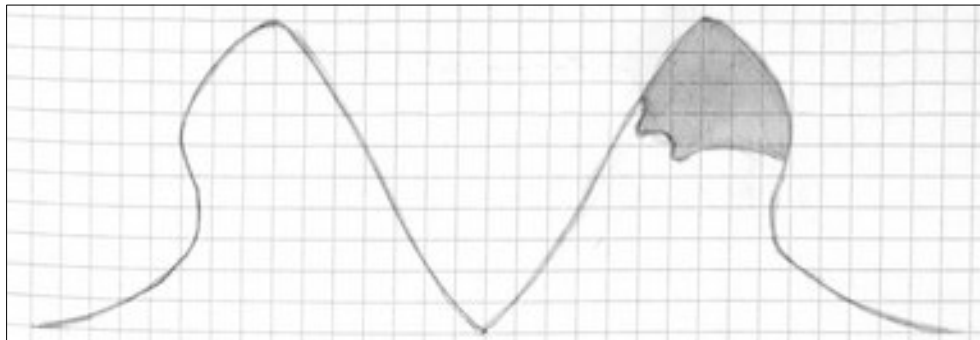

**Description:** Male; 4 feet, gold.

**Sessions attended:** B16

**Comments:** Passed me at arm's length chasing Twilight. Tip configuration of two identical points arranged symmetrically is impossible to miss.

### Shark 369

nickname:

*Posy*

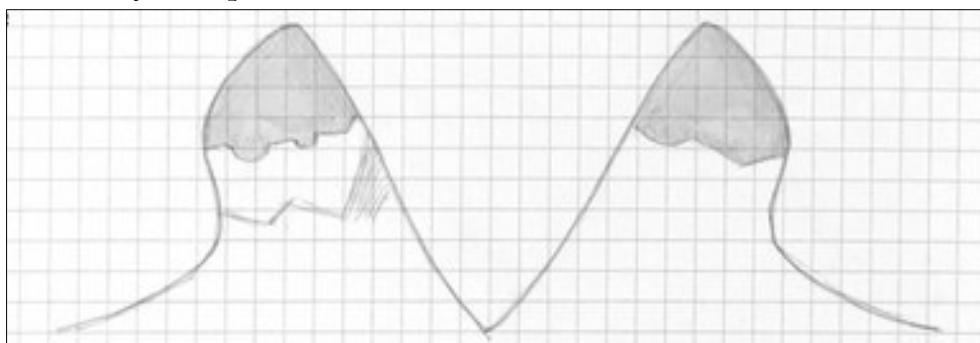

**Description:** Female; 6 feet, grey.

**Sessions attended:** B19

### Shark 370

nickname:

*Tuvalutoo*

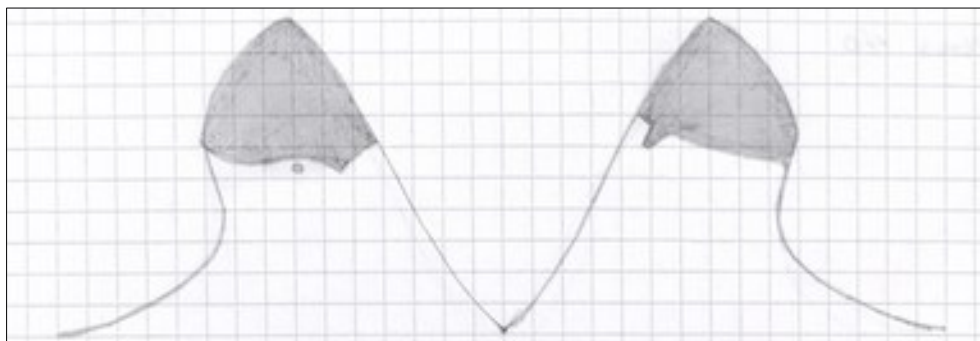

**Description:** Male; 3.5 feet. Tip line right side like Tuvalu.

**Sessions attended:** z33

## Shark 371

nickname:

*Filandra*

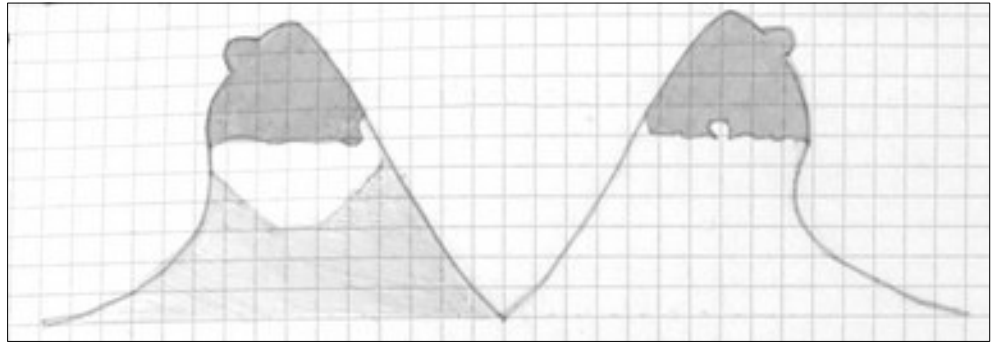

**Description:** Female; 5.5 feet, light coloured.

**Sessions attended:** 293

**Comments:** Considering she is so easy to recognize it is remarkable that she was never seen before or since and suggests that the sharks' pattern of roaming is far more extensive and complex than I had assumed.

## Shark 372

nickname:

*Cedar*

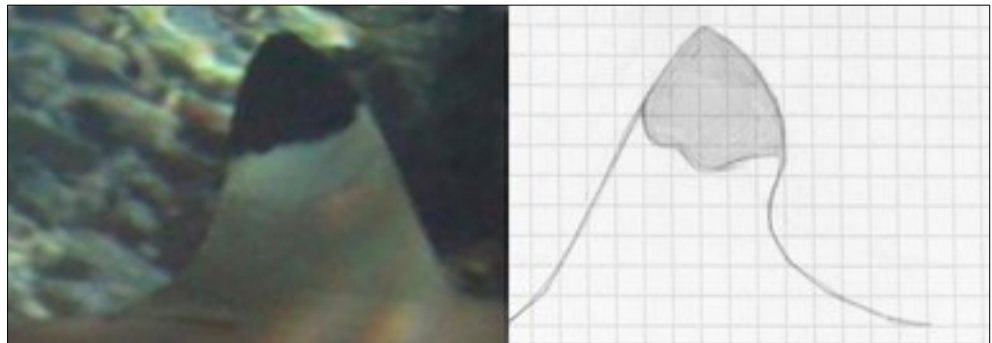

**Description:** Pup; 2.5 feet, bronze.

**Sessions attended:** Z28, 266, z55

## Shark 373

nickname:

*Blue Blazes*

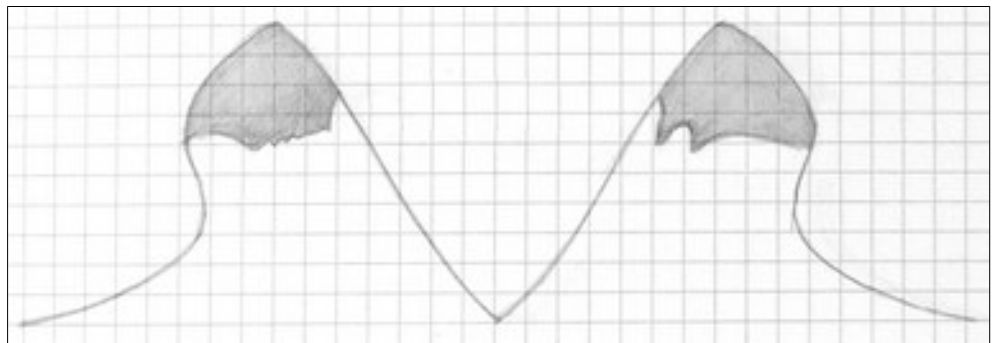

**Description:** Juvenile male, bronze. Little pup at z30; still small at 305.

**Sessions attended:** Z30, 293, z41, 295, a35, 299, 302, 303, 305, z54, z57, z59, z60, z61, z62, z63, z64, z65, z66, z67

## **Shark 374**

nickname:

*Tawny*

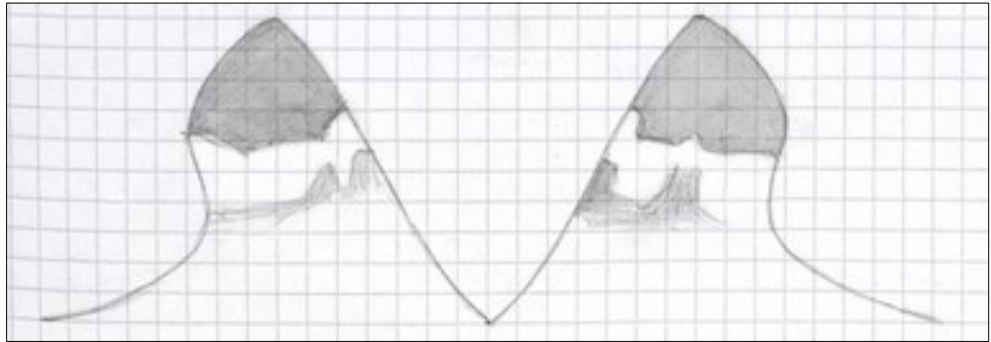

**Description:** Pup; 2.5 feet.

**Sessions attended:** z30, 257, 260, B41, 261, 262, 265, 267, 273, 279, a28, 283, 285, a31, 287, 288, 290, 291, 293, 296-298, a35, 299, 301-303, z50, 304, 305, z54, z55, z57, z58, z59, z60, z62, z64, z65. Z66, z67

## **Shark 375**

nickname:

*Petrovka*

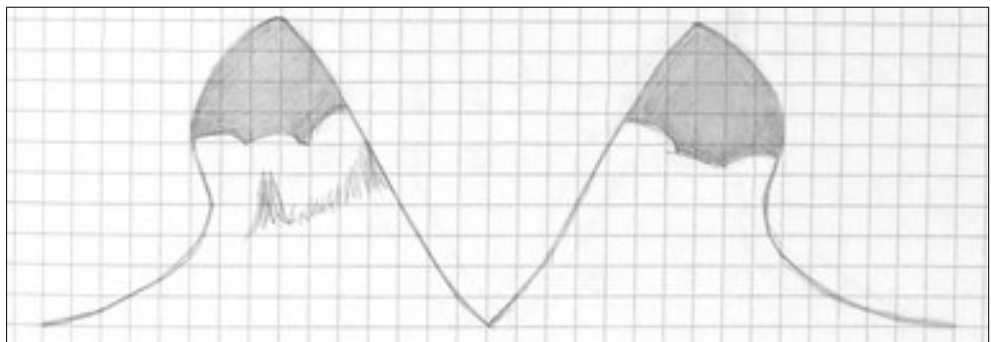

**Description:** Female; 6 feet.

**Sessions attended:** B16

## **Shark 376**

nickname:

*Splashes*

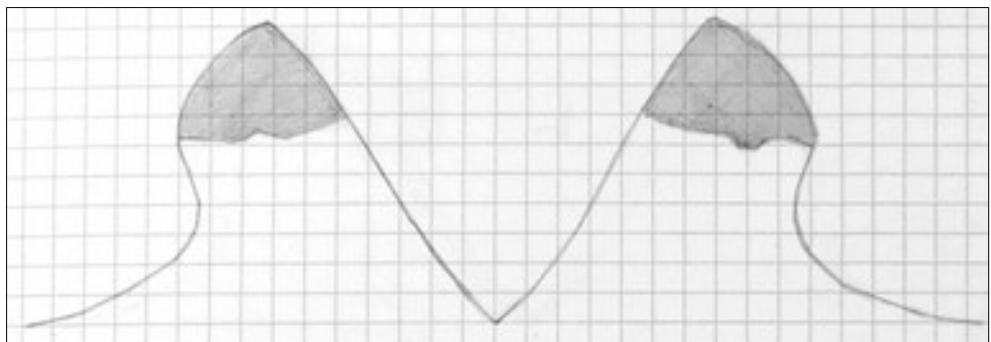

**Description:** Pup; 2.5 feet, bronze.

**Sessions attended:** z30, 294

### **Shark 377**

nickname:

*Kim*

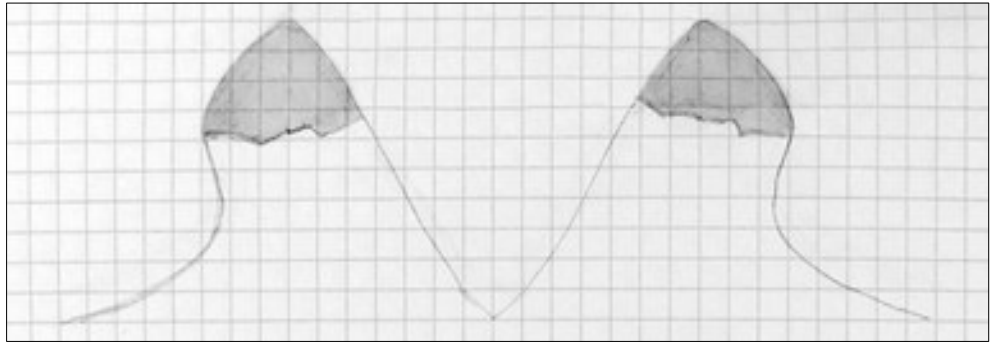

**Description:** Male; 3.5 feet, gold.

**Sessions attended:** Z30, 272, 300

### **Shark 378**

nickname:

*Cambray*

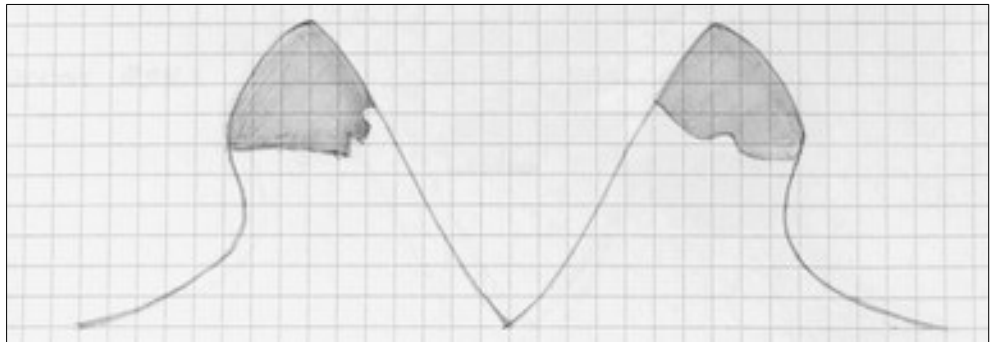

**Description:** Male juvenile; 3.5 feet initially, grey

**Sessions attended:** z30

### **Shark 379**

nickname:

*Kady*

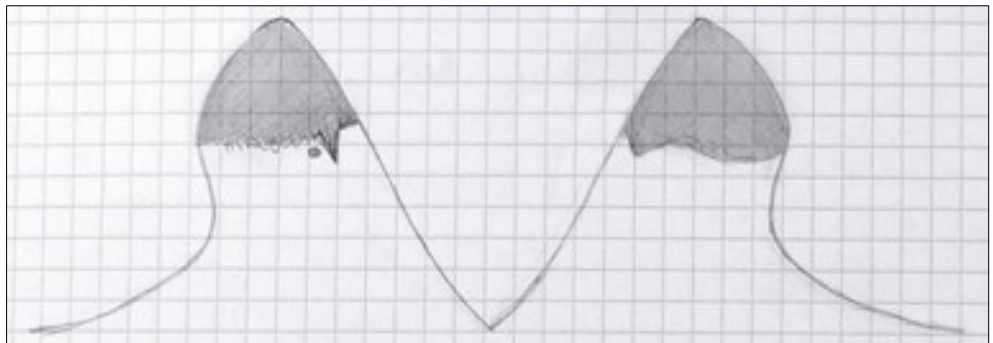

**Description:** Male; 4 feet.

**Sessions attended:** z32

## Shark 380

nickname:

*Megan*

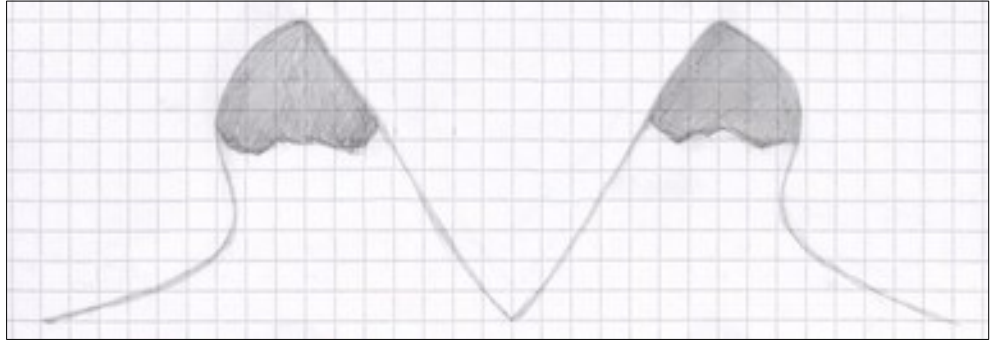

**Description:** Female; 4 feet.

**Sessions attended:** B3, B6, B7, B8, B18, B20, B21, B23, B24, B26, B27, Az32, Az34

## Shark 381

nickname:

*Papillon*

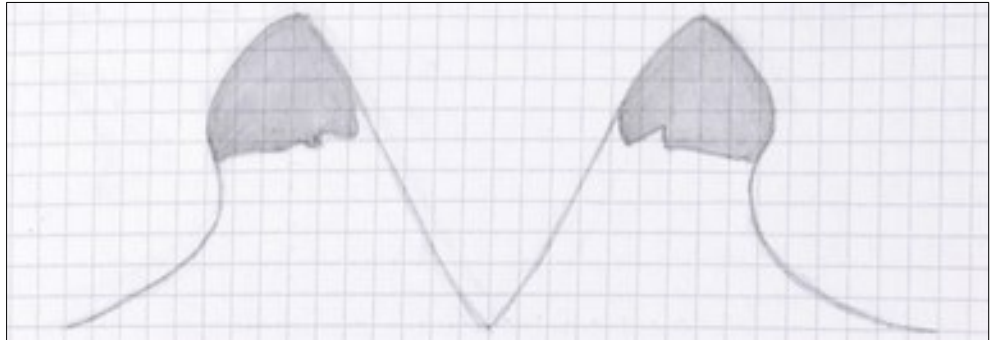

**Description:** Female; 3 feet.

**Sessions attended:** B5, B6, B8-11, B16 -19, B21-27, Az32, B28, B29, Az33, B31, Az34, B32, B34, Az35, B37-42, B44, B45, A268, A272

## Shark 382

nickname:

*Picatrix*

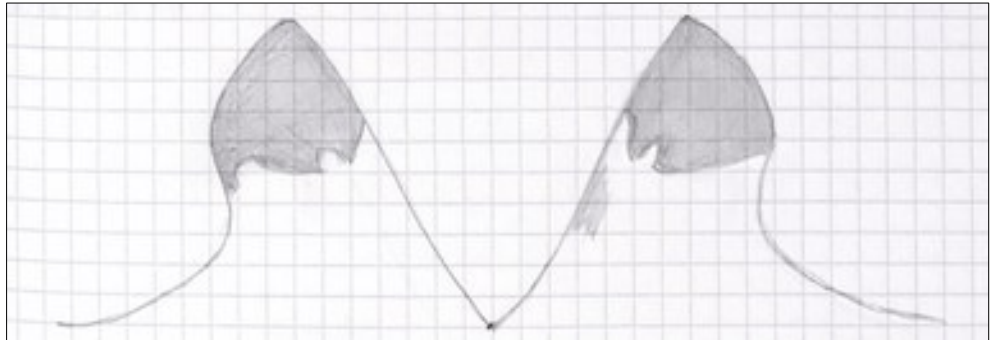

**Description:** Pup; 2.5 feet. Oval white mark right side, 2 cm long (vertical).

**Sessions attended:** Z32, 279, a28, 286, 296, 299, 300, z54

## Shark 383

nickname:

*Astrid*

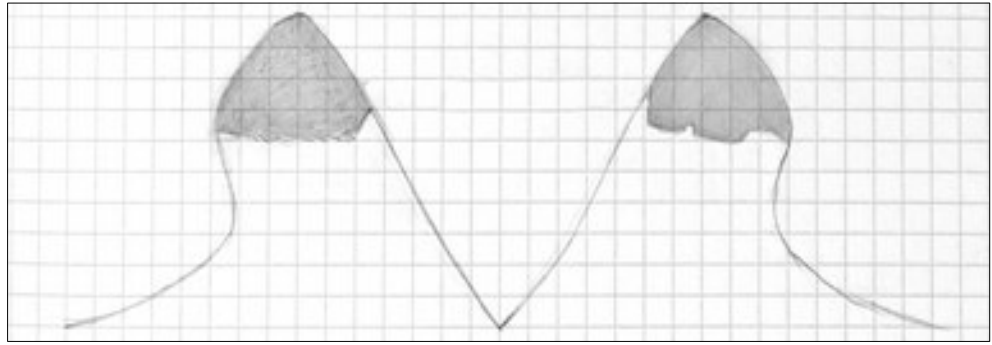

**Description:** Female; 3.5 feet.

**Sessions attended:** z32, 267

**Comments:** Mating wounds at z32.

## Shark 384

nickname:

*Faroe*

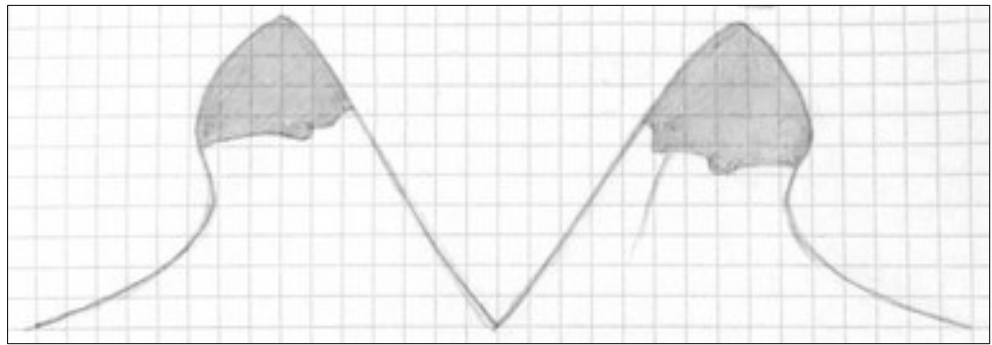

**Description:** Male juvenile; 3 feet grey-brown, growing.

**Sessions attended:** 3-11, 13, 15, 17, 18, 19, 21, 23, 25, 26, 27, Az32, 29, 30, 31, 32, 33, 34, Az35, 36, 37, 39-42, 44, A266, A269

**Comments:** Juvenile moving out of the thick coral refuges of Section B.

## Shark 385

nickname:

*Raoul*

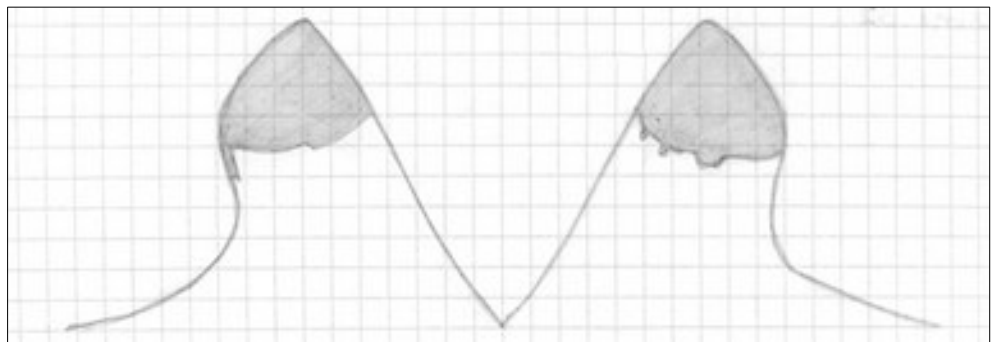

**Description:** Male juvenile; 3.5 feet, gold.

**Sessions attended:** z33, z34, B36, 265, 267, 269, 271



## Shark 386

nickname:

*Susannah*

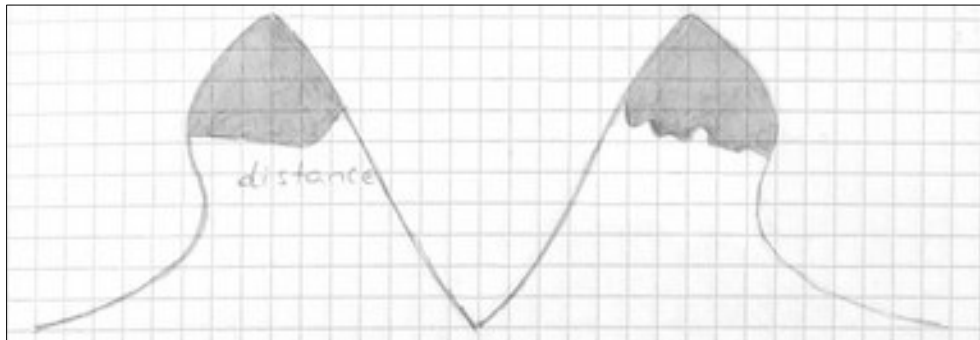

**Description:** Female; 3 feet, brown.

**Sessions attended:** B11, B19

## Shark 387

nickname:

*Tristant*

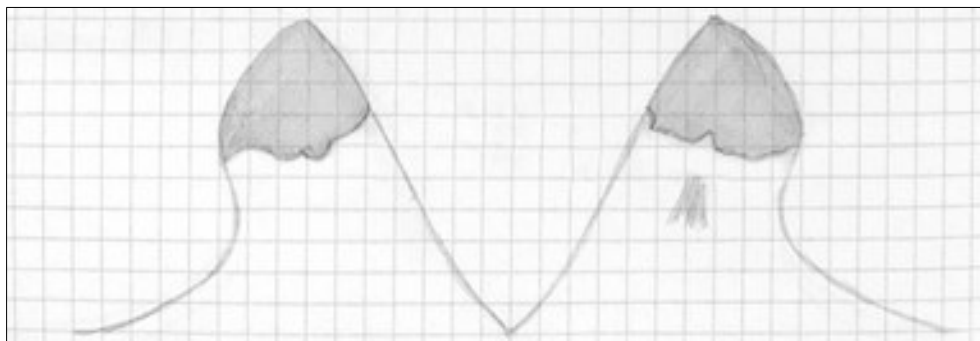

**Description:** Pup; 2 feet when identified.

**Sessions attended:** Z33, 266, 269, 270, 272, 274, 281, 283-291, z40, 292, 293, 295, z45, 298, z46, z50, 304, 305, z54, z55, z57, z58, z62, z63, z64, z65, z66, z67

**Comments:** Association with Piccadilly and Sparling, possibly Jazz, too, all juvies of the same age. They were id'd together, often came together.

## Shark 388

nickname:

*Jazz*

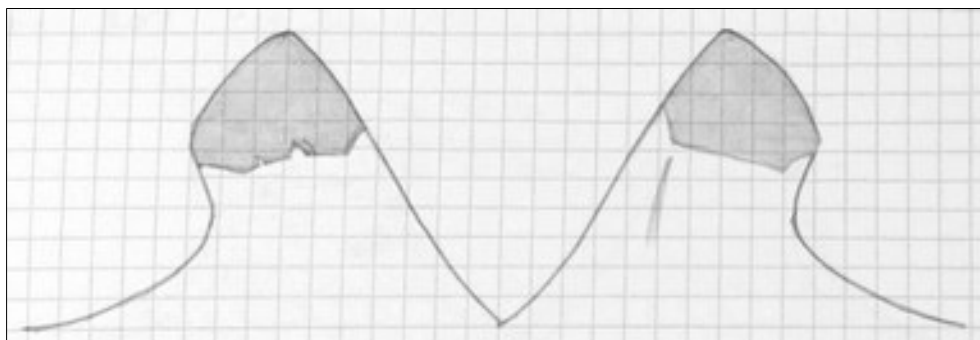

**Description:** Pup; 2 feet when identified.

**Sessions attended:** z33, z35, 260, 261, 289, 291, z40, 293, z41, 295, z42, z43, 296, 297, z45, 298, 299, z49, z50, 304, z51, z52, 305, z54, z55, z56, z57, z58, z59, z63, z65, z67

**Comments:** Association with Piccadilly, Tristant, and Sparling, all juvies of the same age, usually together.

## Shark 389

nickname:

*Piccadilly*

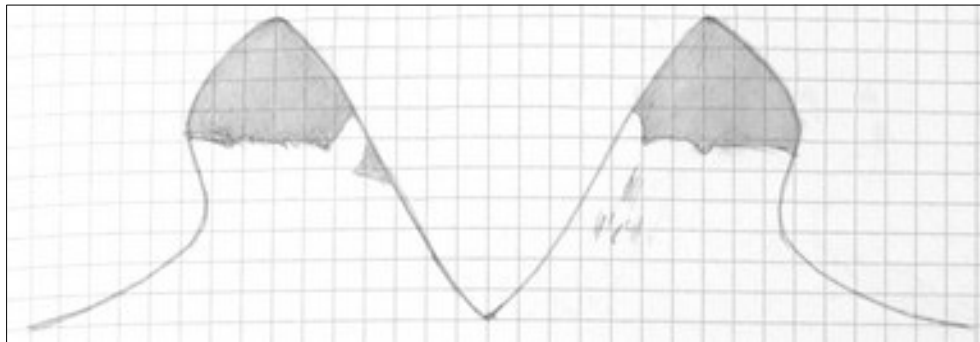

**Description:** Male pup; 2 feet when identified.

**Sessions attended:** z33, z34, z35, 258, 261, 270, 272, 281, a28, 287, 290, z40, 292, 293. z41, 295, z42, 296, 297, 298, z46, 301, 304,

**Comments:** Growing tiny claspers at 304—approx 3 cm.

## Shark 390

nickname:

*Twitchy*

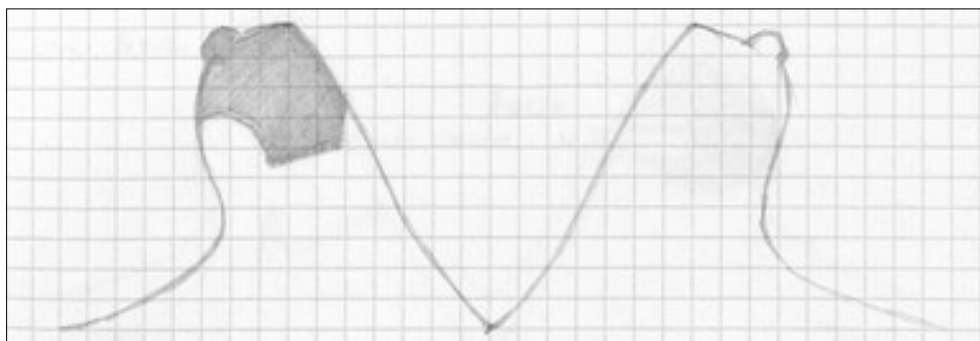

**Description:** Male; 4 feet, very dark.

**Sessions attended:** B11

**Comments:** Only time he appeared at a session was just before the disappearance of the sharks from the northern shore of the island. The entire time he was present he was twitching, shuddering, and changing direction erratically, in a state normally expressed after the shark has been badly startled. His strange behaviour and appearance at that time suggested that the disappearance had involved the sharks being seriously disturbed and scattered before they fled.

## Shark 391

nickname:

*Star*

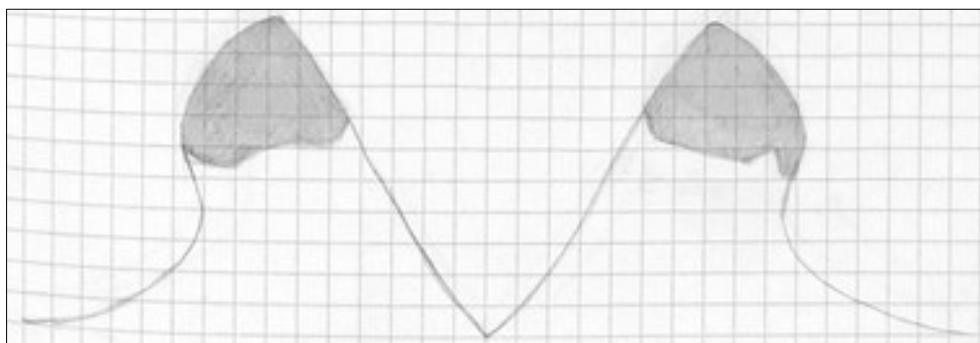

**Description:** Pup; 2 feet.

**Sessions attended:** Z34.

### **Shark 392**

nickname:

*Jordi*

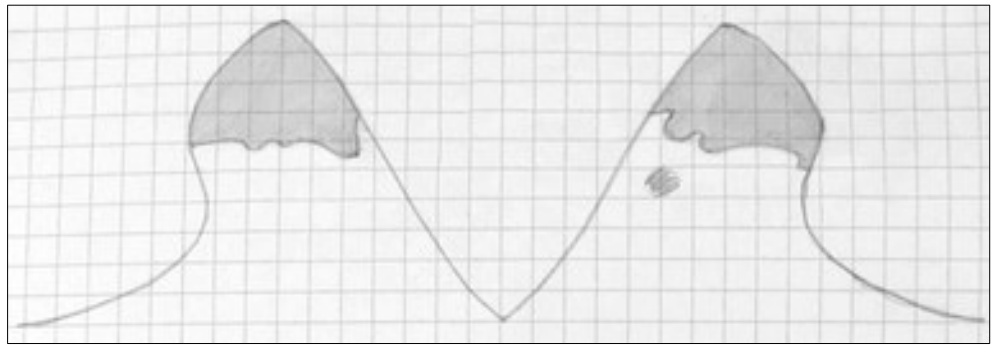

**Description:** Male; 4 feet.

**Sessions attended:** Z34

### **Shark 393**

nickname:

*Marling*

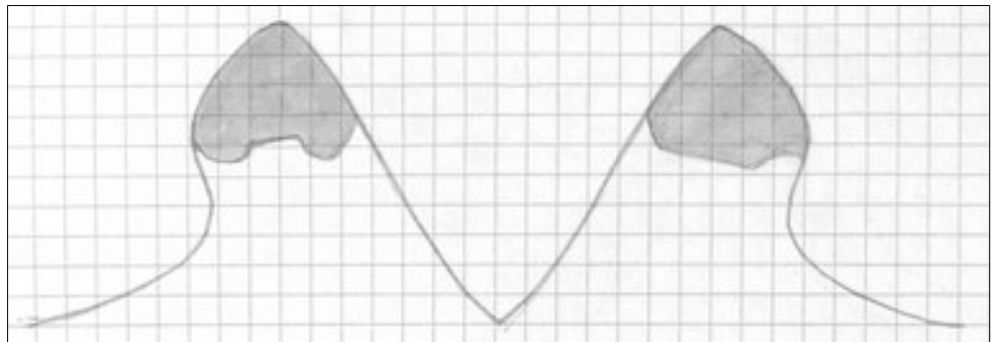

**Description:** Male; 4 feet.

**Sessions attended:** Z34

### **Shark 394**

nickname:

*Fall*

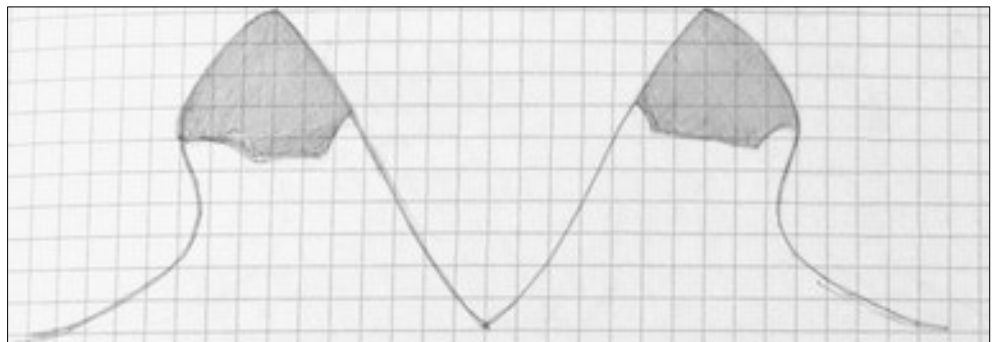

**Description:** Pup; 2 feet when identified.

**Sessions attended:** Z34, Z35

## Shark 395

nickname:

*Aragon*

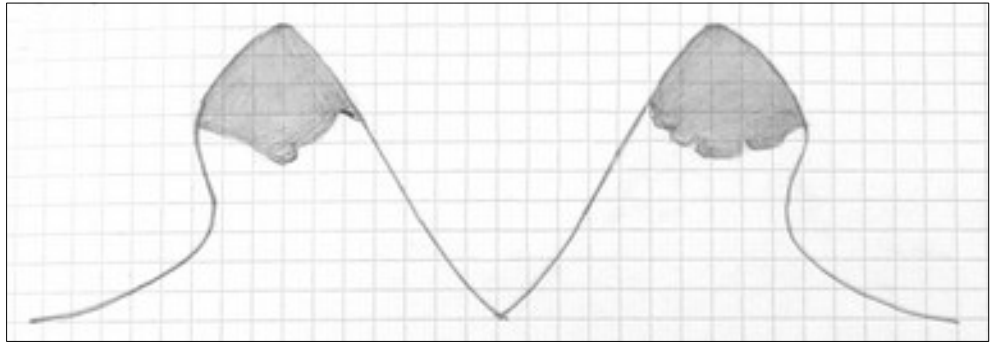

**Description:** Pup; 2.5 feet.

**Sessions attended:** Z35, 266, 281, 282, 287, 291, 293, z41, 295, z42, 296, 297, 298, z46, 299-301, z52, 305, z53, z54, z55, z59, z60, z62, z63, z64, z65, z67

## Shark 396

nickname:

*Rora*

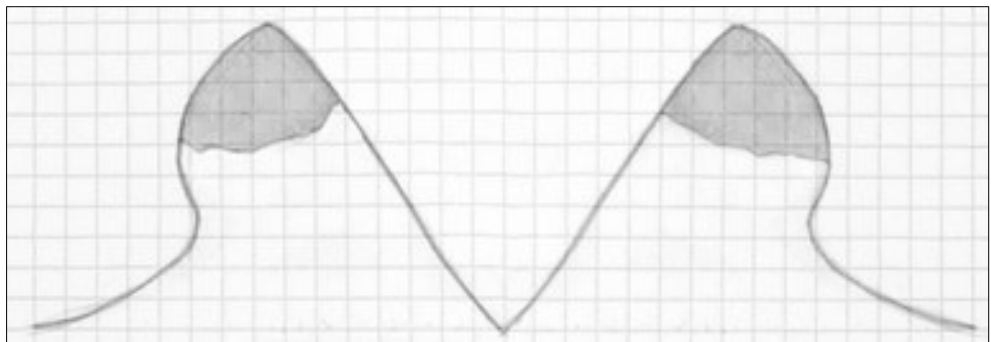

**Description:** Female; 6 feet.

**Sessions attended:** 257

**Comments:** Even such a simple configuration is really rare.

## Shark 397

nickname:

*Cormack*

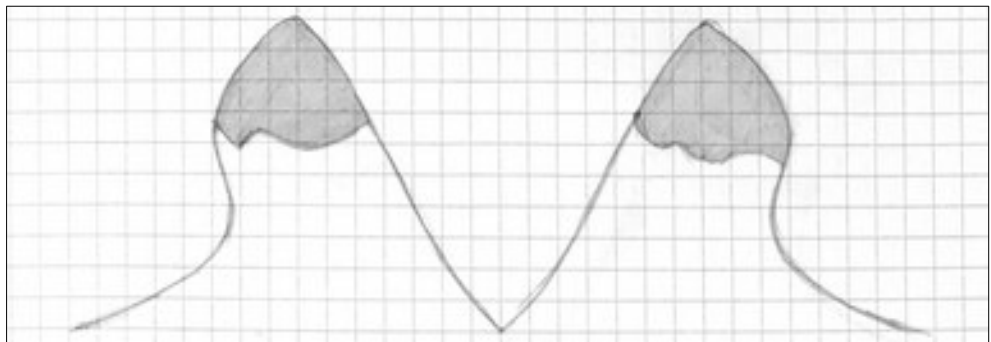

**Description:** Male; 3.5 feet.

**Sessions attended:** B19

## Shark 398

nickname:

*Merry*

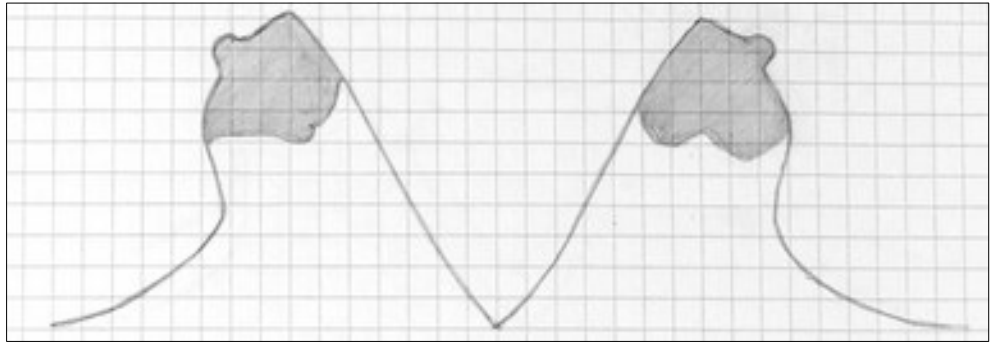

**Description:** Female juvenile when identified; 3.5 feet, brown.

**Sessions attended:** B19, 257, 259, 261, 265, 269, 270, 271, 274, 278, a27, 280, 281, a28, 283, 284, a29, 285, a30, 290, 291, z40, 292, 293, a33, 296, 297, 300, a38, 304, z52, 305, z56, z57, z58, z59, z60, z61, z62, z65

## Shark 399

nickname:

*Sparling*

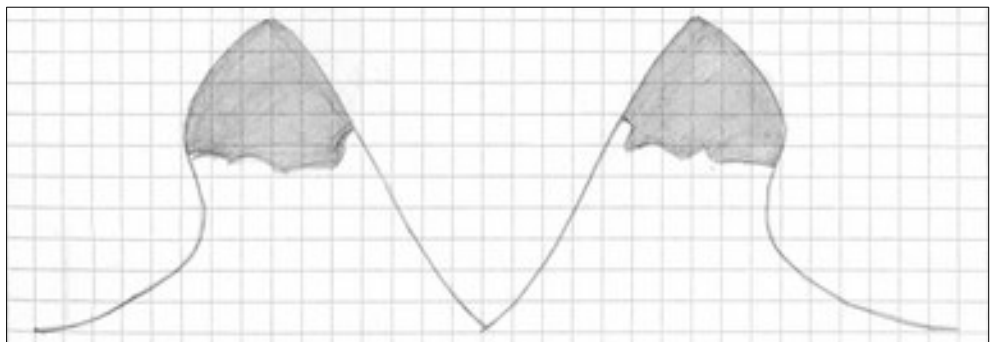

**Description:** Pup; 2 feet.

**Sessions attended:** 260-263, 270, 271, 274, 280, a28, a30, 287, 288, z38, 291, z40, 292, 293, z41

## Shark 400

nickname:

*Coco*

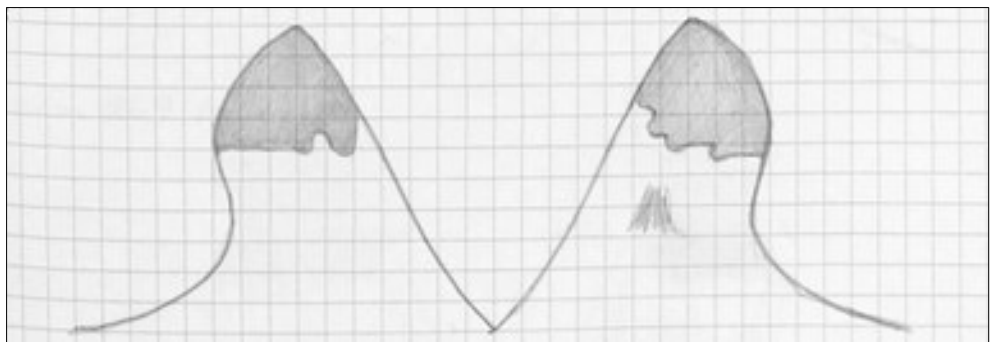

**Description:** Male juvenile; 3 feet.

**Sessions attended:** 261, 280, 282, z50, 305

**Comments:** Tiny claspers forming when I first saw him, 3" long by March 8, 2004 (280)

## Shark 401

nickname:

*Melody*

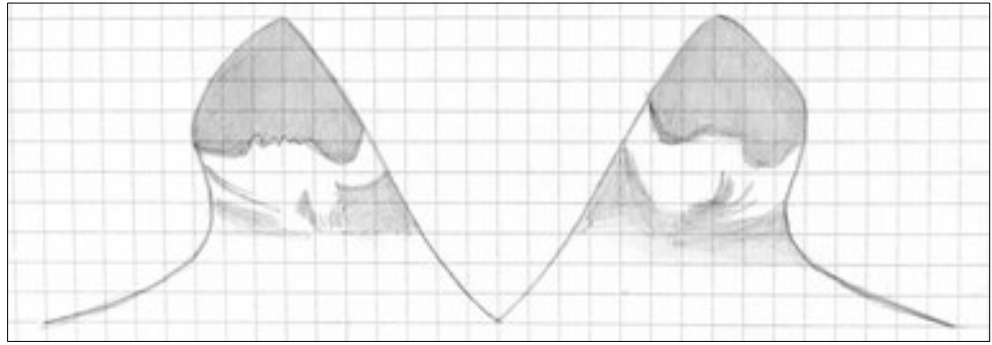

**Description:** Female juvenile; 3.5 feet.

**Sessions attended:** 265, 267, 271, 282, 285, 287, 288, 289, z39, 290-292, z41, 295-299, z49, 304, 305, z54, z55, z56, z59

**Comments:** The first sightings of her were evening barrens sessions when the sharks were first being finned and I often checked on them. Seen in a.m. in eastern barrens. Getting quite big at 305.

## Shark 402

nickname:

*Scardon*

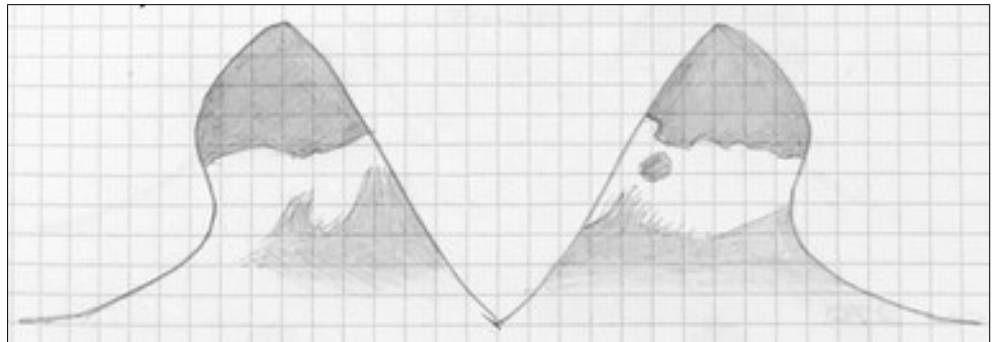

**Description:** Male; 4 feet.

**Sessions attended:** 267

## Shark 403

nickname:

*Adrian*

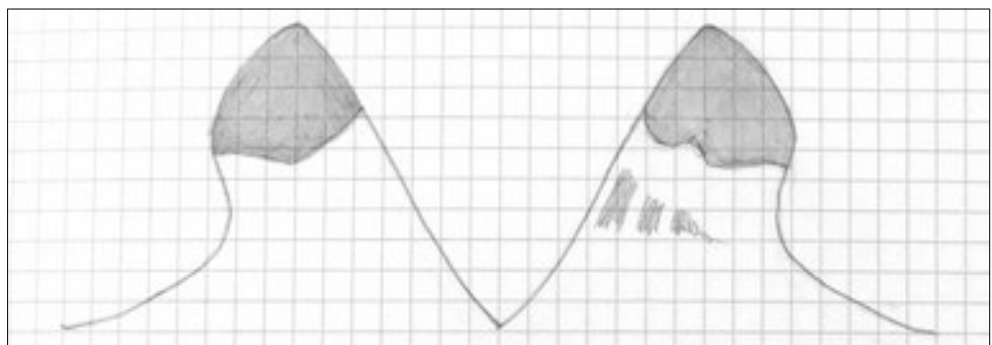

**Description:** Female; 5 feet, grey.

**Sessions attended:** 269, 272



## Shark 404

nickname:

*Silky*

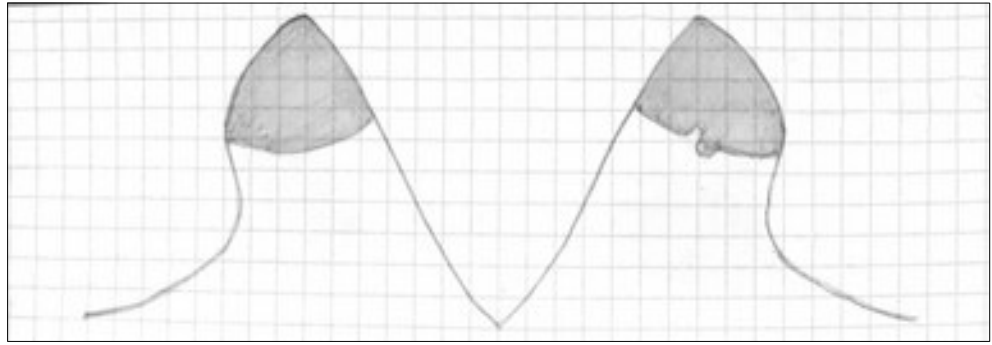

**Description:** Female; 4 feet, brown.

**Sessions attended:** 270, 279, 292

## Shark 405

nickname:

*Spookytoo*

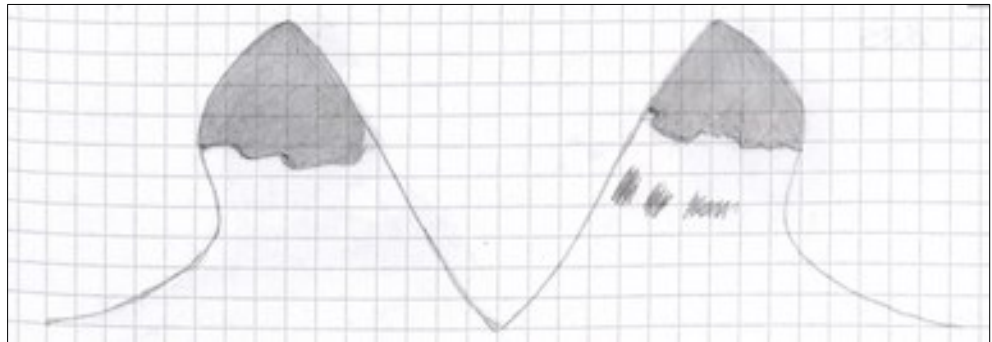

**Description:** Male juvenile; 3.5 feet.

**Sessions attended:** B33, B34, B40, B42, B44, 272, 274

**Comments:** Small claspers noted at B42

## Shark 406

nickname:

*Aspen*

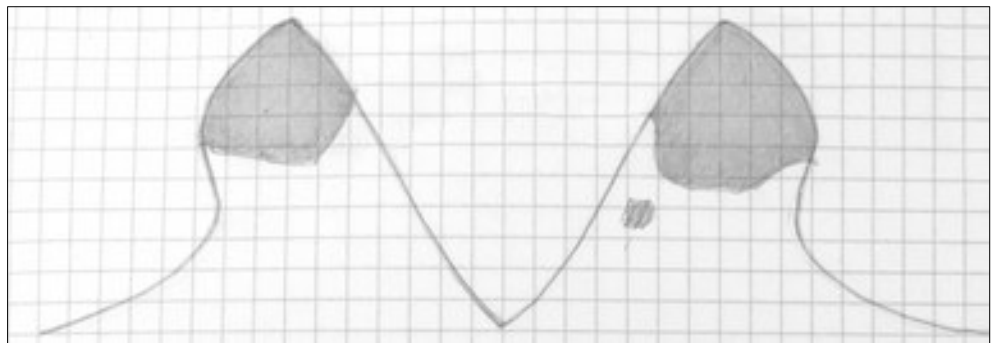

**Description:** Male; 4 feet, brown. Light dot on left side in front of dorsal fin.

**Sessions attended:** 272

## Shark 407

nickname:

*Medoc*

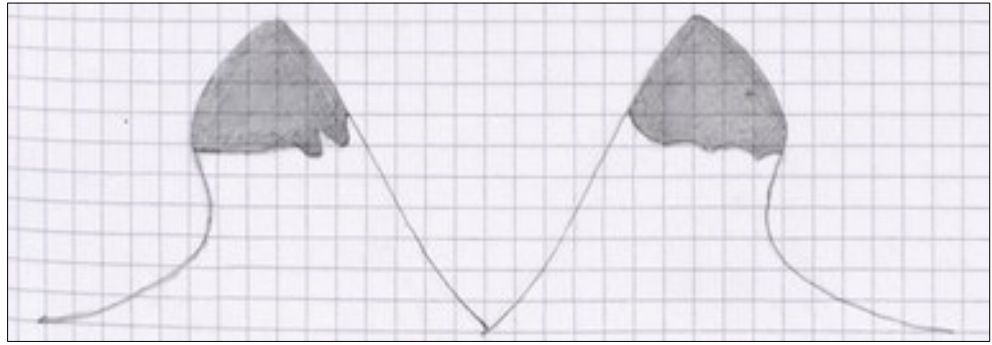

**Description:** Male; 4 feet.

**Sessions attended:** 272

**Comments:** Came with Aspen.

## Shark 408

nickname:

*Tricks*

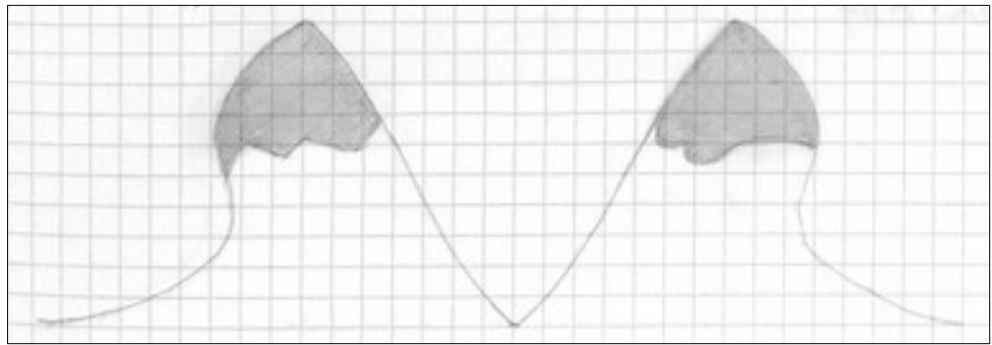

**Description:** Juvenile; 3 feet.

**Sessions attended:** B38, 272, z55, z56, z58, z59, z60, z62, z63, z64, z65, z66

## Shark 409

nickname:

*Saragossa*

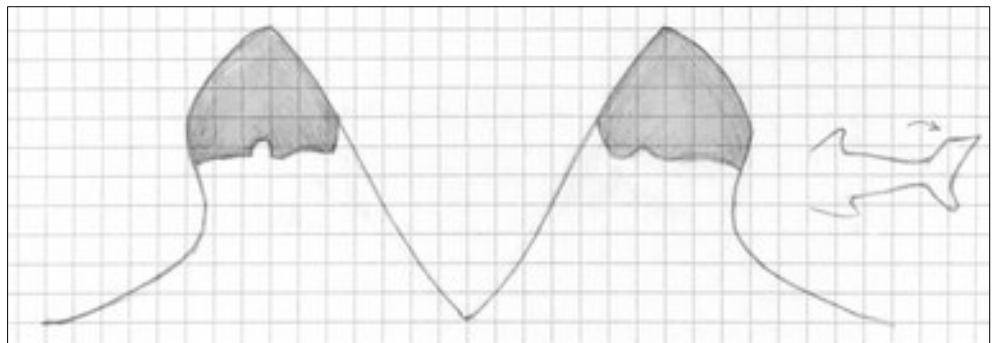

**Description:** Female; 4 feet, yellow ochre. Tail tip cut off.

**Sessions attended:** O3, 272, 280

**Comments:** Suddenly approached when I was swimming with Shilly in Section A in 2005 and very slowly passed us. Another unusual finding of a strange female in the ocean.

## Shark 410

nickname:

*Carmeline*

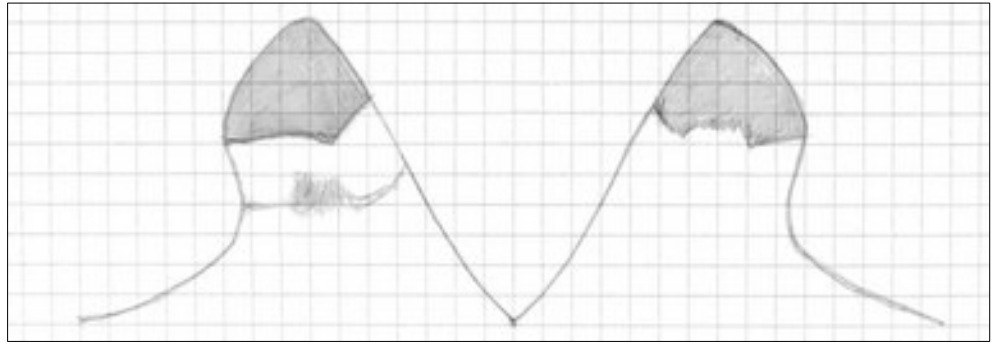

**Description:** Female; 5 feet, dark grey.

**Sessions attended:** B39, 272, 287, 290, 292, 293, 295-297, 299, 300, 303, z66

**Comments:** Strong connection with Tzara, coming once annually not only to the same sessions, but at the same time, Tzara following about a minute behind in Carmeline's scent trail.

## Shark 411

nickname:

*Tzara*

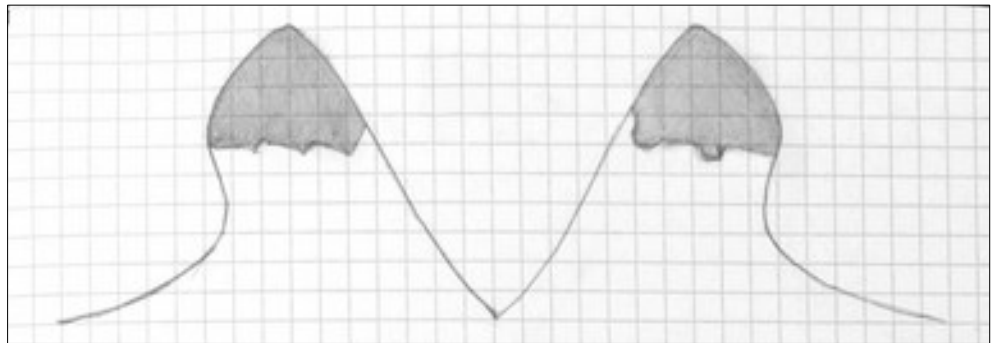

**Description:** Female; 5 feet, grey.

**Sessions attended:** B39, 272, 274, 287, 290, 292, 302, 303, z64, z65

**Comments:** Strong association with Carmeline. Nasty lure stuck in the left side of her nose at 303, Dec. 11, 04. Still there on August 12, 05, at z64.

## Shark 412

nickname:

*Tansy*

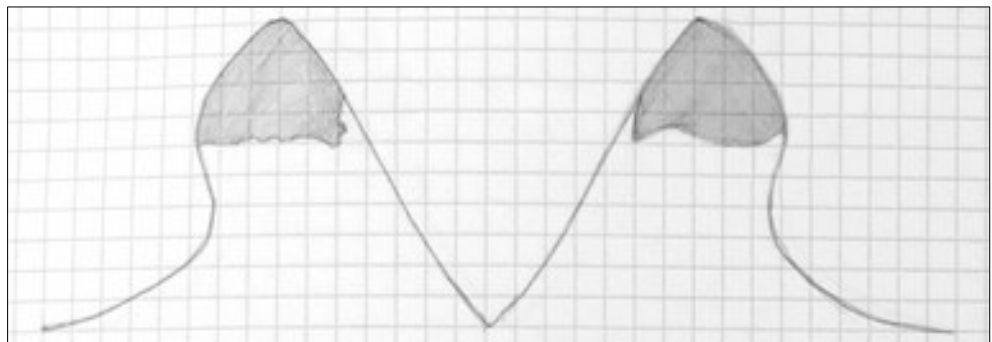

**Description:** Female juvenile; 3.5 feet, bronze.

**Sessions attended:** B20, B24, B35, B40, B42, A272, A278 272, 278

## Shark 413

nickname:

*Oleander*

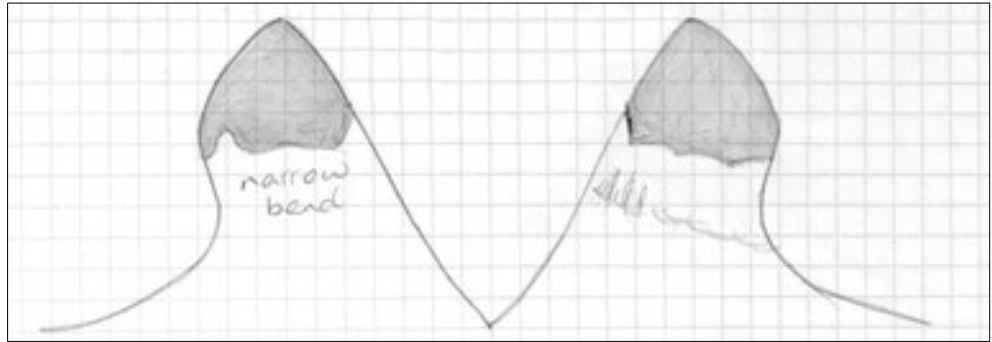

**Description:** Pup; 2 feet, bronze.

**Sessions attended:** 272, z36, a27, 280, z40, 293, z41, 296, a34, 299, z47, 300, 303, z50, z54, z55, z57, z63

## Shark 414

nickname:

*Sparky*

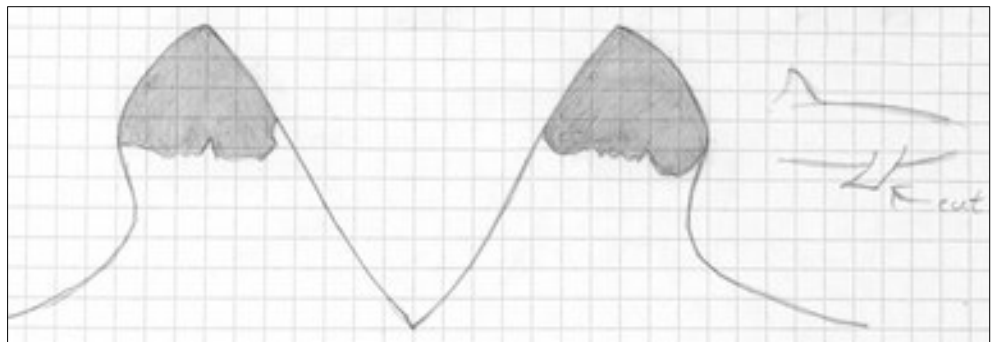

**Description:** Female; 5.5 feet, grey.

**Sessions attended:** 274

## Shark 415

nickname:

*Slinky*

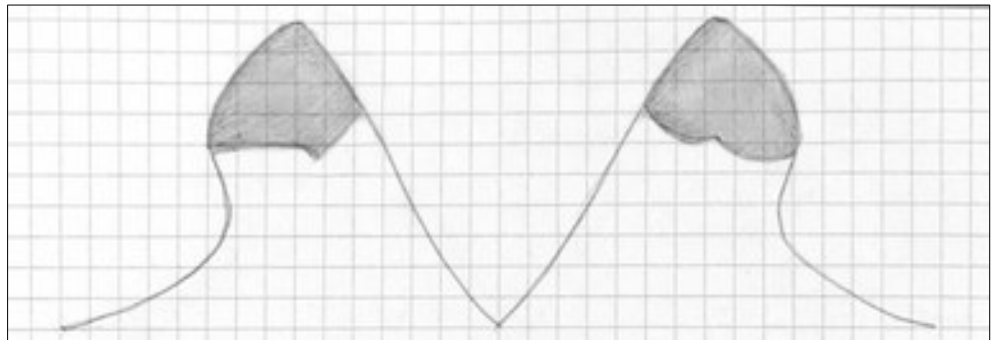

**Description:** Pup; 2 feet, grey.

**Sessions attended:** 278, a28, 283, a30, 291, 292, 293, 295, 297-299, a38, z54, z55, z59, z60

## Shark 416

nickname:

*Andrian*

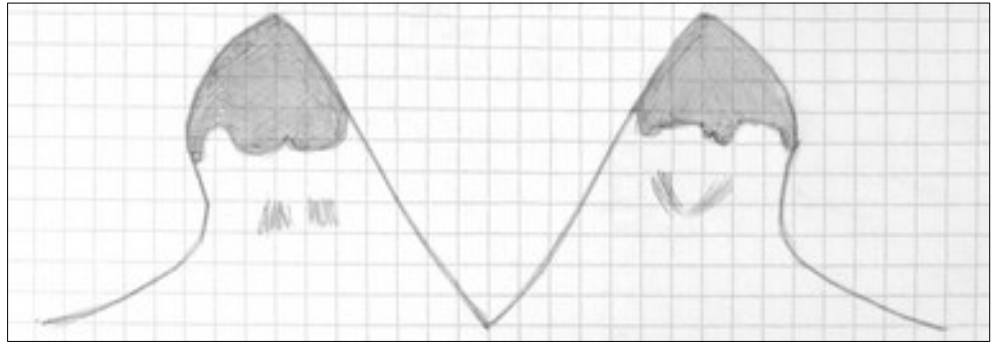

**Description:** Male; 4 feet dark grey. Older individual; skin marked.

**Sessions attended:** 279, 282, 287, 292

## Shark 417

nickname:

*Mandy*

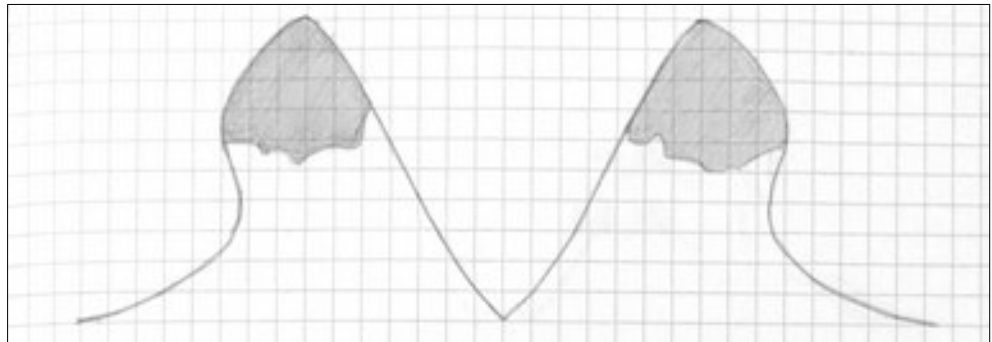

**Description:** Female; 5 feet, light grey.

**Sessions attended:** 280

## Shark 418

nickname:

*Blaze*

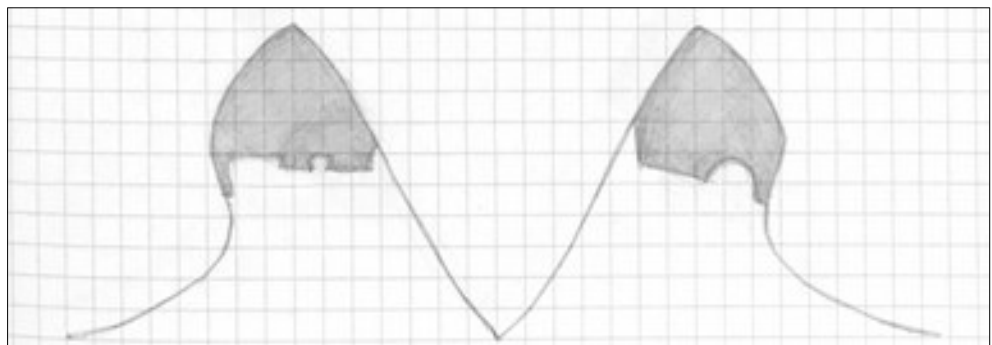

**Description:** Male; 4 feet, dark grey. Low contrast light mark on his right side, somewhat forward from dorsal fin.

**Sessions attended:** 281, a28, 296, 298-300, z48, z49, z61

**Comments:** Older animal, possible association with Andrian; both were in the area at the same time, yet not seen before.

## **Shark 419**

nickname:

*Sonata*

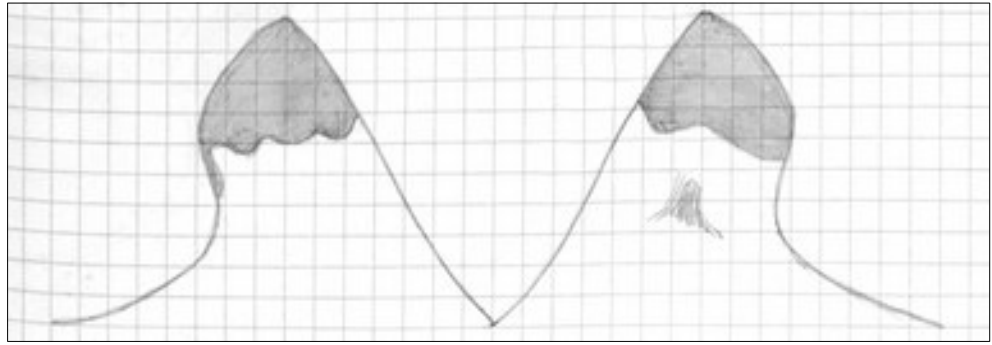

**Description:** Male pup; 2.5 feet initially.

**Sessions attended:** A28, 296, 297, 300, 303, 305, z54, z56, z58, z60

**Comments:** Small claspers about 2.5 to 3 inches long at z54

## **Shark 420**

nickname:

*Blue*

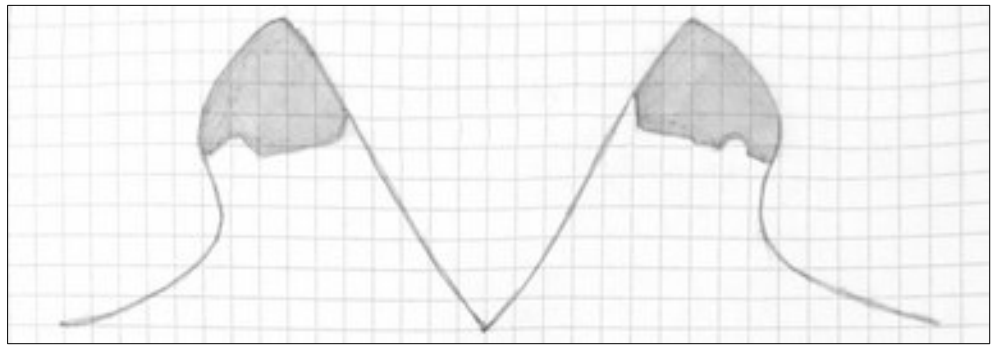

**Description:** Pup; 2 feet, bronze.

**Sessions attended:** A28, z62

## **Shark 421**

nickname:

*Mandolin*

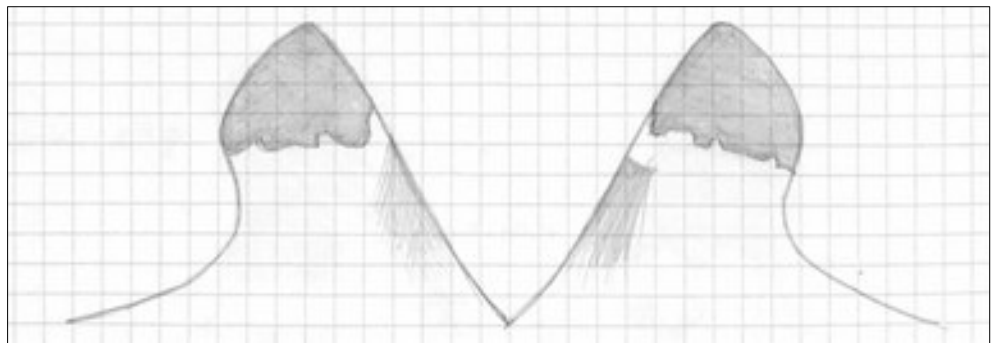

**Description:** Female; 5 feet dark grey.

**Sessions attended:** Z37, 299



## **Shark 422**

nickname:

*Samphire*

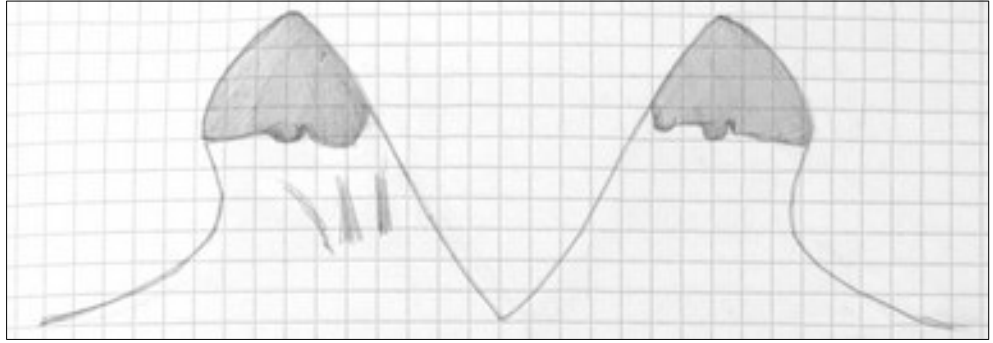

**Description:** Female; 6 feet, pale grey.

**Sessions attended:** 32, 37, Aa31, A31, 293, z41, z55, z56 z59, z60, z62, z63, z64, z67

**Comments:** Mated early; advanced pregnancy when first seen.

## **Shark 423**

nickname:

*Jacky*

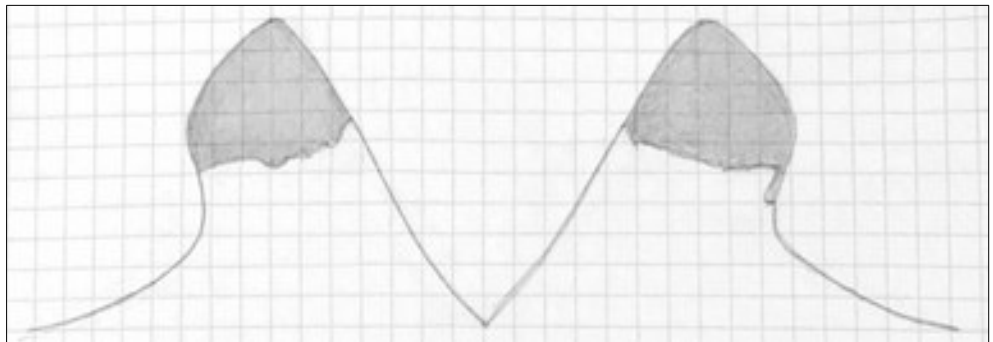

**Description:** Pup 2.5 feet.

**Sessions attended:** 287, 290, 302, z60, z63

## **Shark 424**

nickname:

*Pamplemouse*

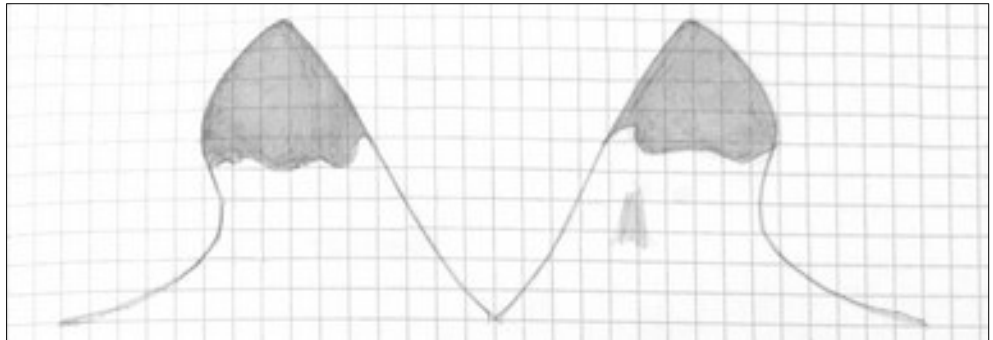

**Description:** Pup; 2.5 feet.

**Sessions attended:** 291, 300

## Shark 425

nickname:

*Blighty*

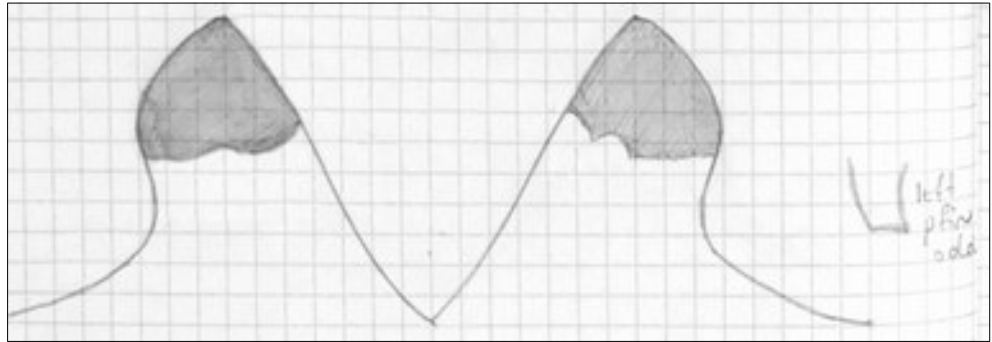

**Description:** Juvenile; 2.5 feet bronze.

**Sessions attended:** 291, 292, 296, 298, 299, 301, 302, z49, 304, 305, z54, z64, z65, z67

**Comments:** Seems to swim awkwardly as if affected by the short pectoral fin.

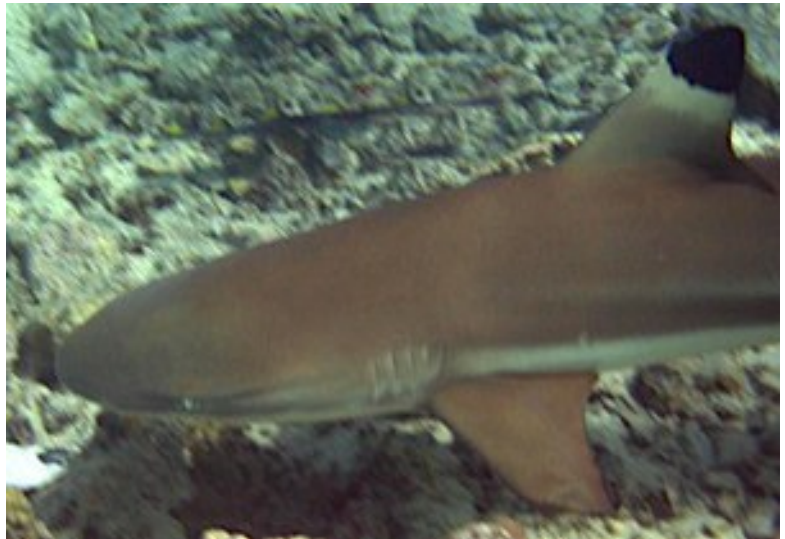

## Shark 426

nickname:

*Trafalgar*

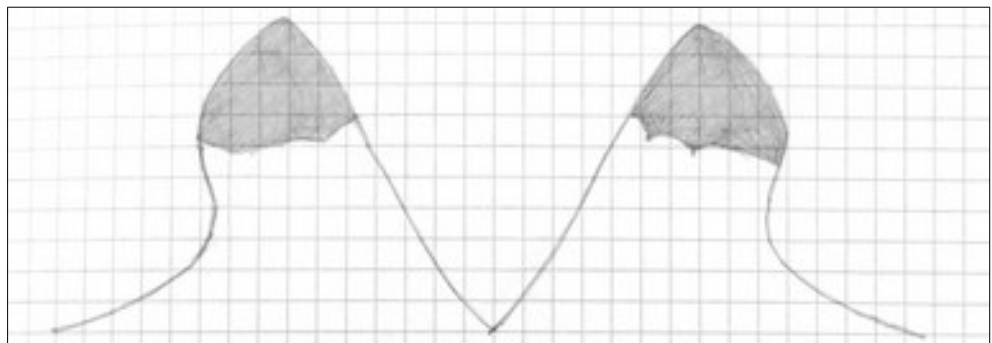

**Description:** Pup; 2.5 feet, light brown.

**Sessions attended:** 290, z40, z41, 293-295, 297, 298, z46, z47, 301, 303, z50, 304, 305, z55, z59, z64, z65

## Shark 427

nickname:

*Camille*

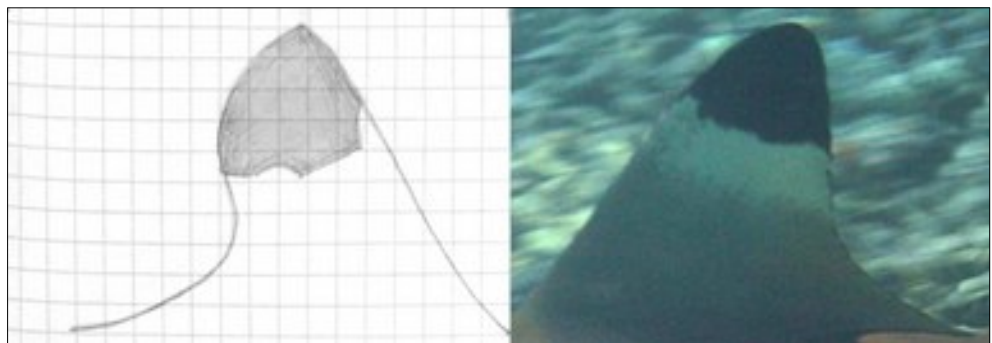

**Description:** Female; 3 feet, dark brown.

**Sessions attended:** 292

### **Shark 428**

nickname:

*Napoleon*

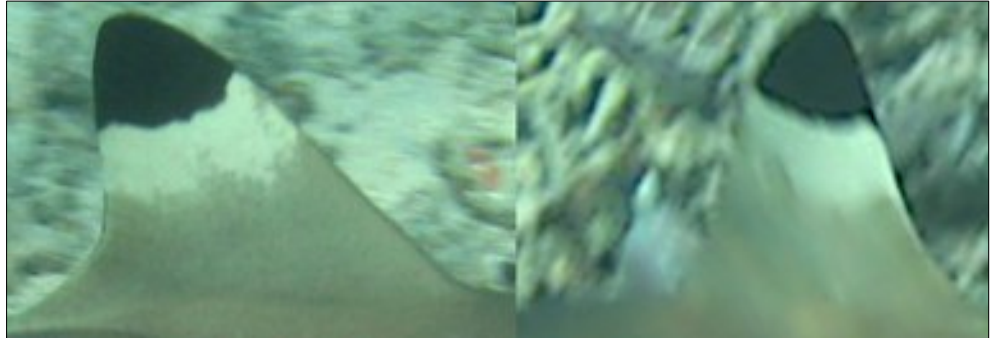

**Description:** Male; a little more than 3.5 feet, mid brown. Prominent flare up front of white band left side, not apparent in the photo. Otherwise the left tip line is fairly straight.

**Sessions attended:** Z54, z62, z66, z67

### **Shark 429**

nickname:

*Kashi*

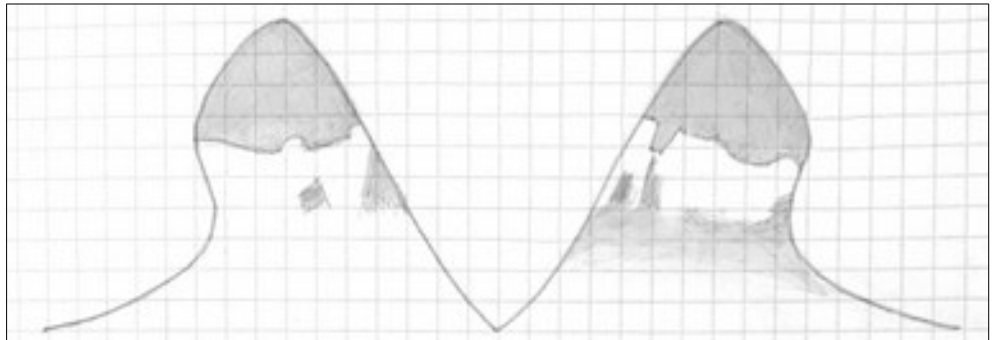

**Description:** Male; 4 feet. 2 light dots right side tail blade, many more on body.

**Sessions attended:** 34, Az41, A295, Az42, 296 z45, 299, 300, 303, z54, z55, z58, z60

### **Shark 430**

nickname:

*Raschelle look-alike*

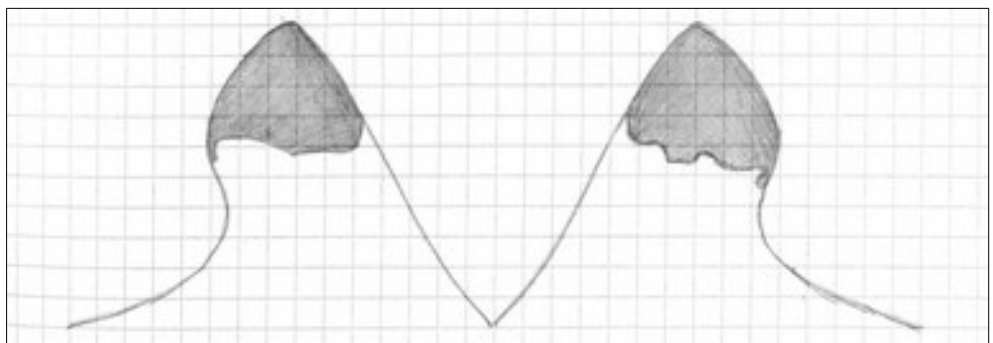

**Description:** Female; 5 feet, ochre. Raschelle's size, shape, colour; very similar from a distance.

**Sessions attended:** B17

### **Shark 431**

nickname:

*Rasputin*

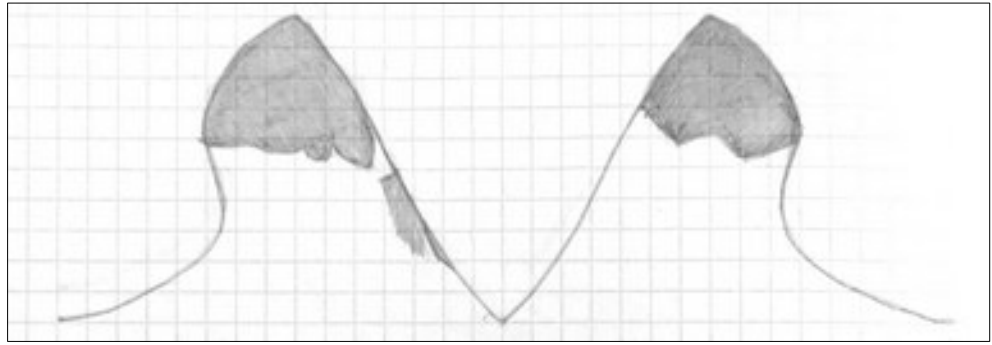

**Description:** Male; 4 feet, pale dramatic shark.

**Sessions attended:** 294, 296

### **Shark 432**

nickname:

*Barcelona*

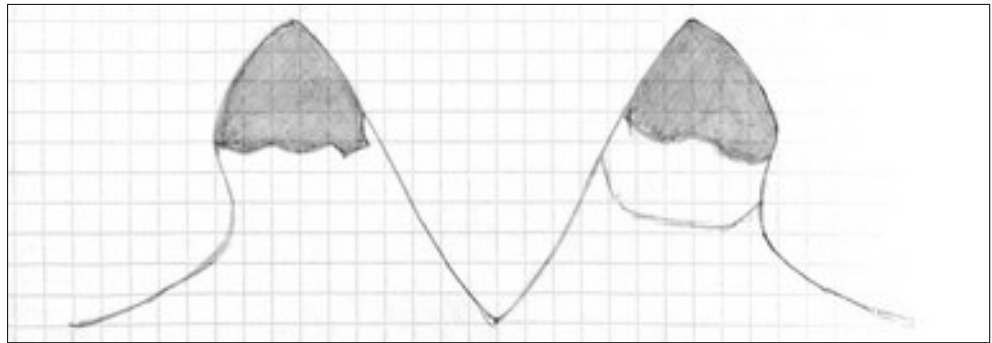

**Description:** Female; 5 feet, dark grey.

**Sessions attended:** 294, 298, 299

### **Shark 433**

nickname:

*Poppet*

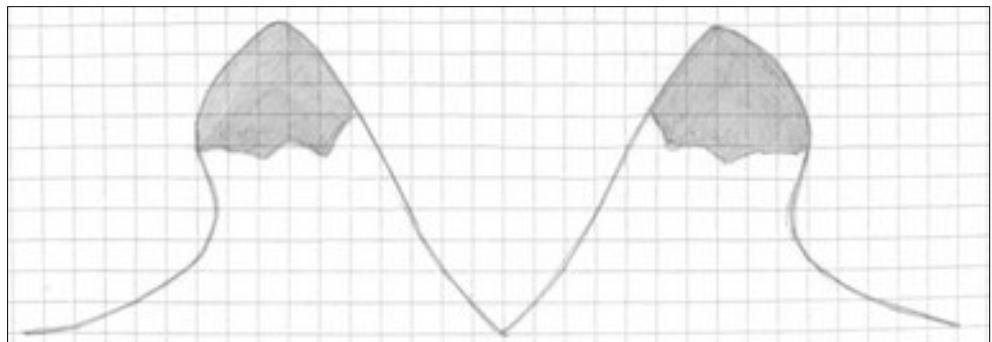

**Description:** Pup; 2.5 feet.

**Sessions attended:** B9, B11, B15, B18, B20-22, B24, B25, B29, B32-35, B39, B43, B44

**Comments:** One of the many small pups sheltering in the thick coral beyond the B Section feeding site.

## Shark 434

nickname:

*Marten*

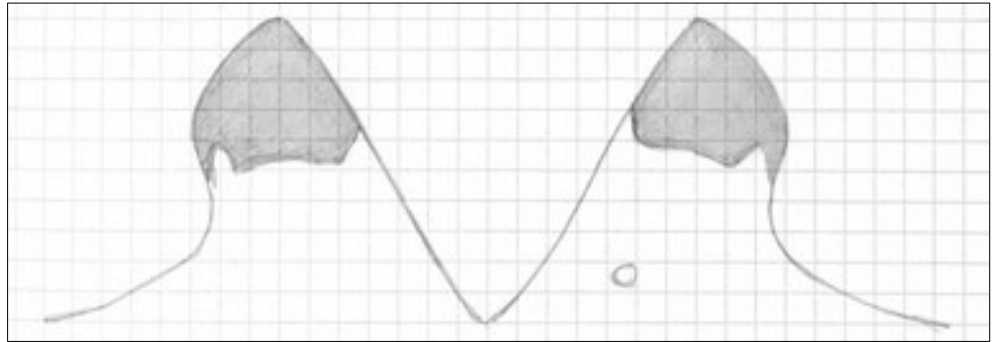

**Description:** Male; 4 feet, grey. Light dot base dorsal fin left side.

**Sessions attended:** B21, B29, B33-45, A265, A268, A274, A278, A280

**Comments:** Interesting that he was a section B male, then switched to site A when I did, but I had never seen him before. You can't miss him, with both sides so distinctive.

## Shark 435

nickname:

*Brandywine*

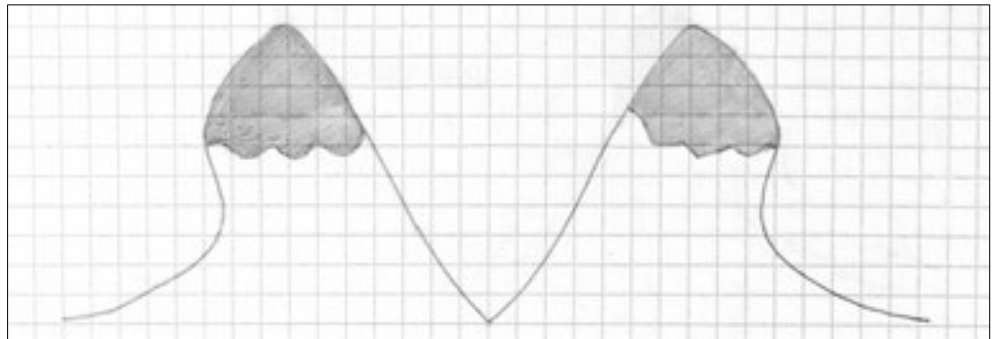

**Description:** Female juvenile; 3.5 feet, bronze.

**Sessions attended:** B22, B30

## Shark 436

nickname:

*Elsinore*

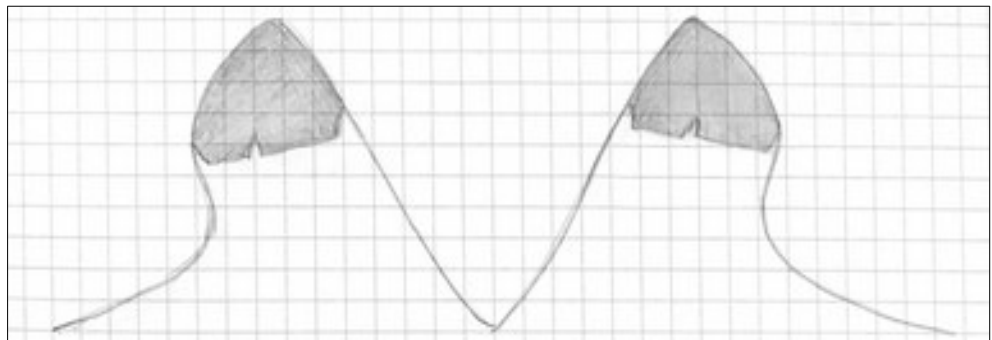

**Description:** Female juvenile; 2 feet, bronze.

**Sessions attended:** 295, 298, 303, z55, z56, z58, z59, z60, z61

### **Shark 437**

nickname:

*Coralie*

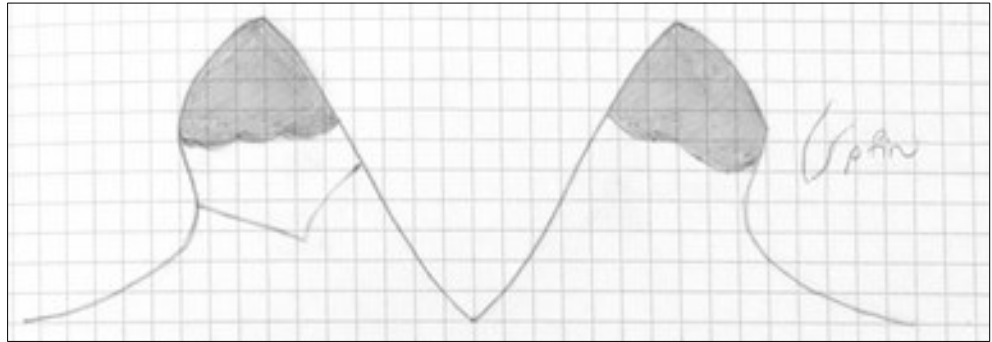

**Description:** Female juvenile; 3.5 feet, bronze. Left pectoral fin is mis-shaped, curved back and pointed.

**Sessions attended:** 295, 296, 299, 301, 305

### **Shark 438**

nickname:

*Annalyn*

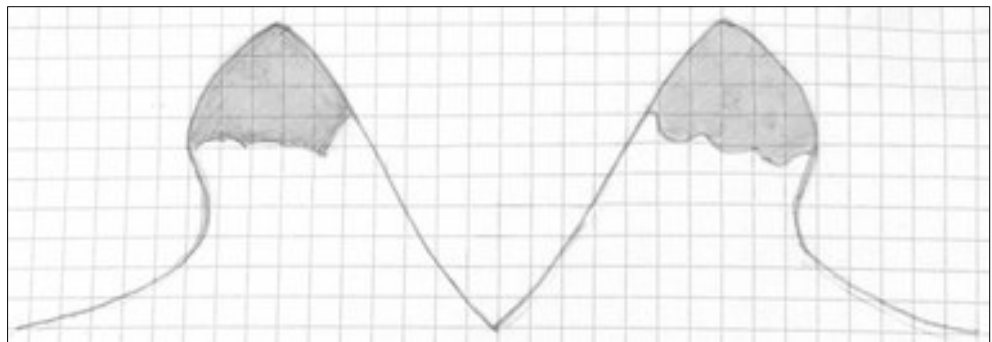

**Description:** Female juvenile; 3.5 feet, bronze.

**Sessions attended:** 296, z46, 301, a38

### **Shark 439**

nickname:

*Llewellyn*

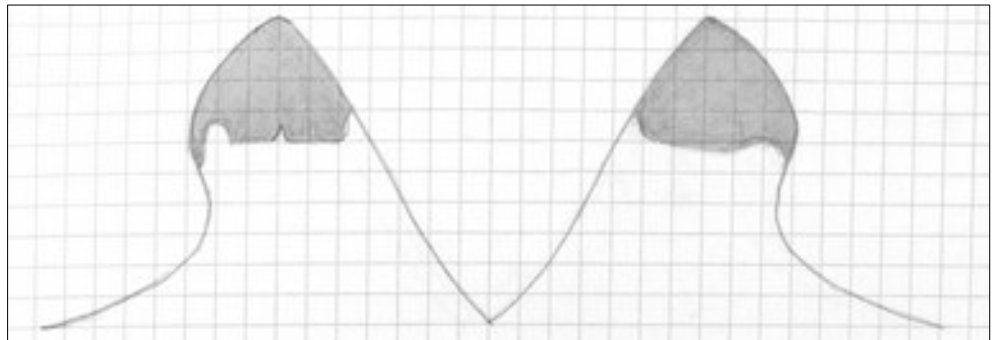

**Description:** Pup; 2.5 feet, bronze.

**Sessions attended:** B22, B30, B35, B36, B37, B39, B40, B43, A265

**Comments:** Curious pup.



## Shark 440

nickname:

*Xanadu*

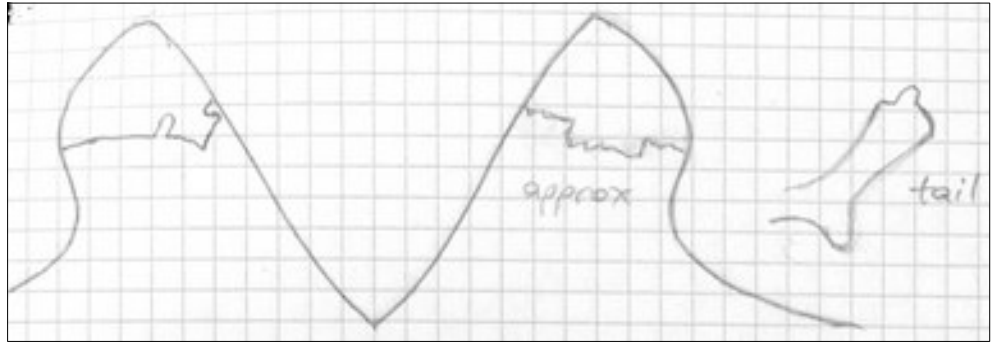

**Description:** Male; 3.5 feet, brown.

**Sessions attended:** B22, B30

## Shark 441

nickname:

*Dark One*

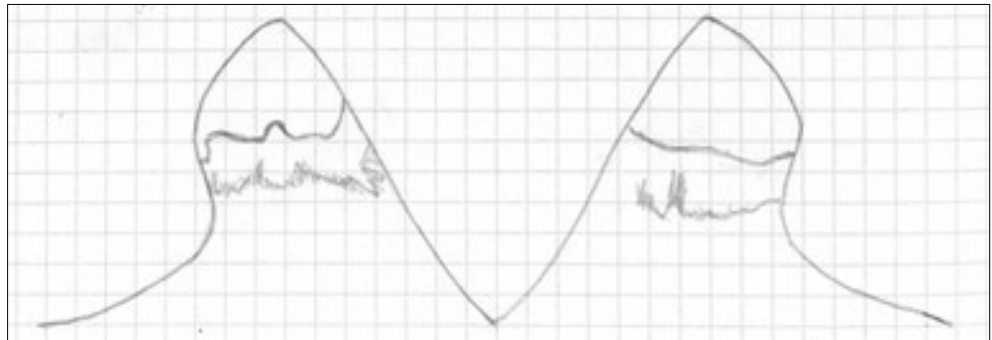

**Description:** Male; 4 feet grey.

**Sessions attended:** 299, 300, z48

## Shark 442

nickname:

*Mercury*

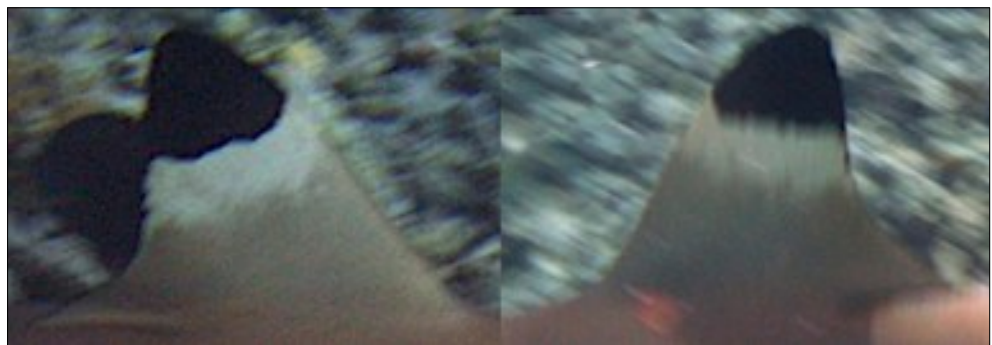

**Description:** Male; 4 feet, bronze.

**Sessions attended:** 299, 300

### **Shark 443**

nickname:

*Tamur*

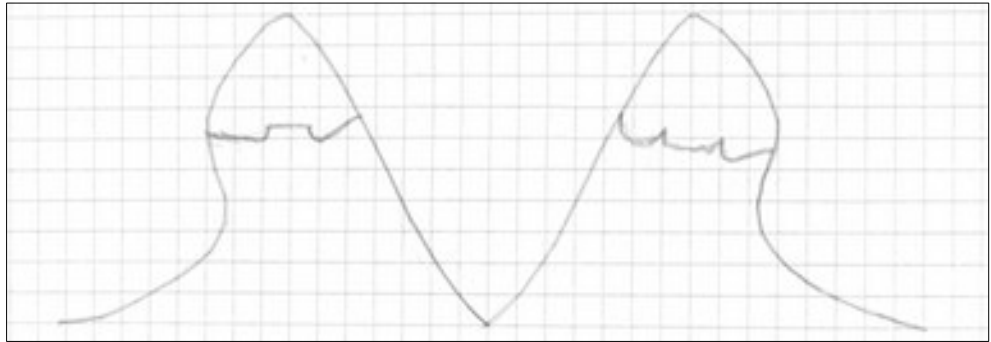

**Description:** Male; 3.5 feet, medium brown.

**Sessions attended:** 300-302, z60

### **Shark 444**

nickname:

*Azure*

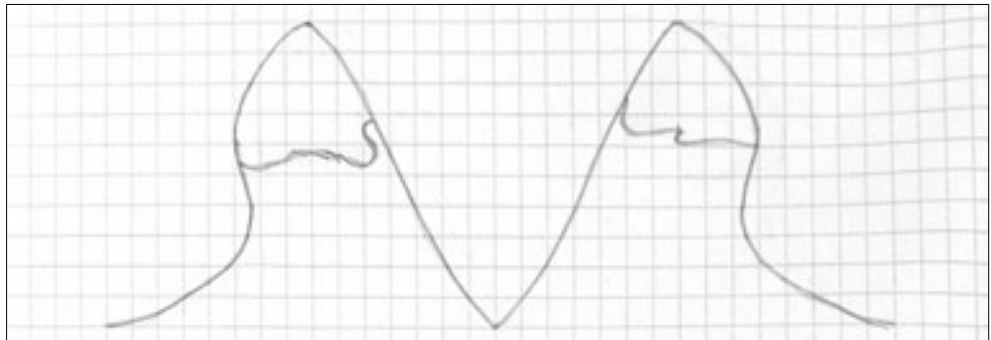

**Description:** Female; 5 feet, grey. Light circle mid left side.

**Sessions attended:** 301

### **Shark 445**

nickname:

*Bridie*

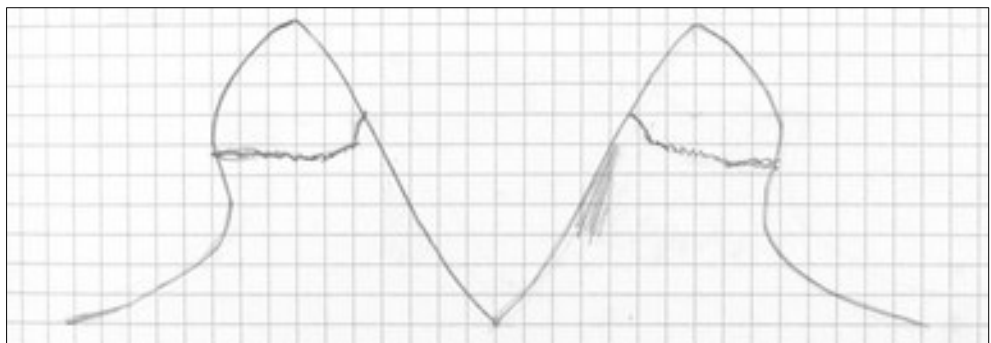

**Description:** Female; 5 feet.

**Sessions attended:** 301

### **Shark 446**

nickname:

*Tyrone*

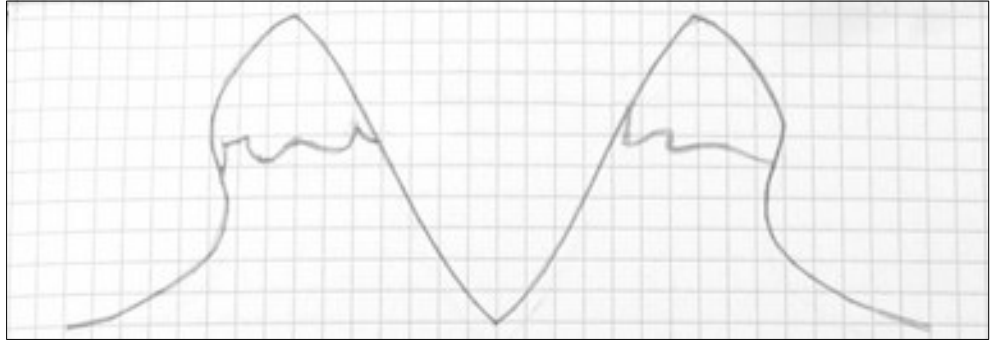

**Description:** Male; 4 feet, grey.

**Sessions attended:** 302

### **Shark 447**

nickname:

*Angela*

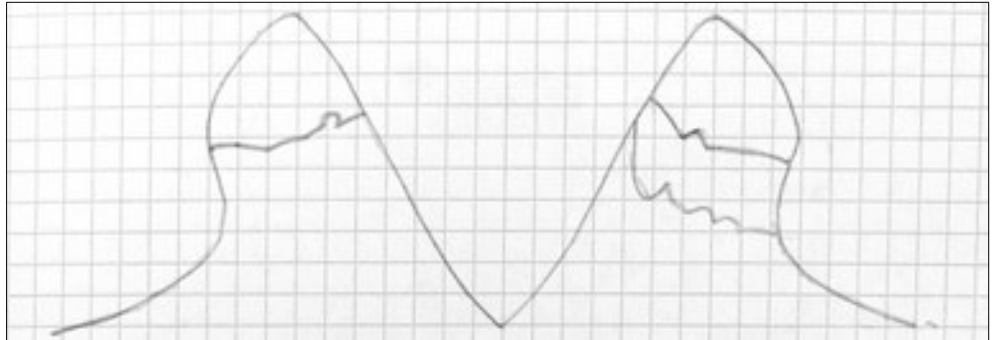

**Description:** Female; 5 feet, grey-brown.

**Sessions attended:** 302

### **Shark 448**

nickname:

*Torpedo*

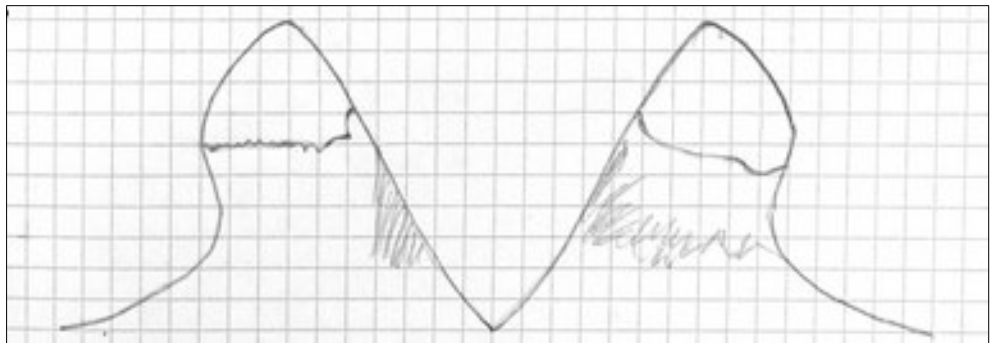

**Description:** Male; 3.5 feet, grey.

**Sessions attended:** z48

## **Shark 449**

nickname:

*Pookie*

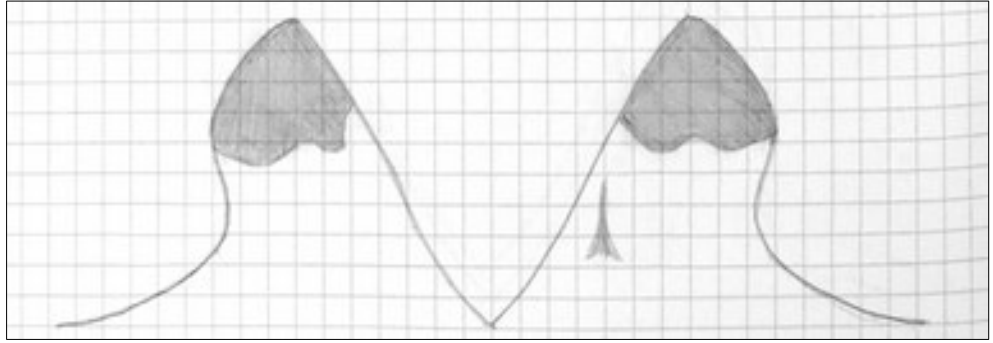

**Description:** Male; 3.5 feet, grey.

**Sessions attended:** 303, 304

**Comments:** Immature claspers.

## **Shark 450**

nickname:

*Force*

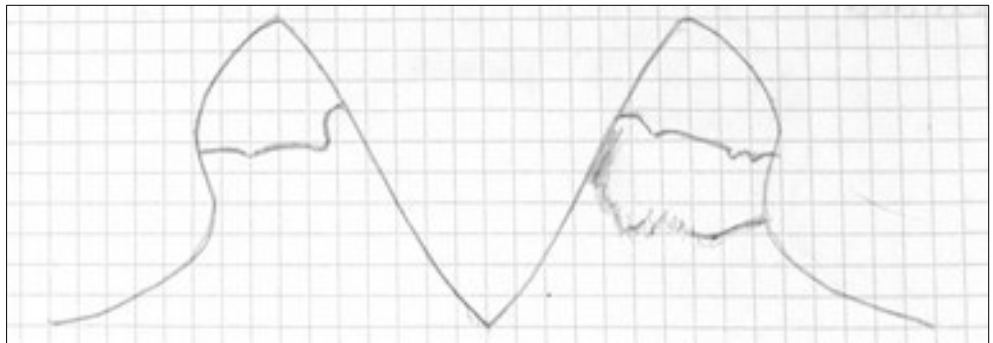

**Description:** Male; 4 feet, dark grey.

**Sessions attended:** 303

## **Shark 451**

nickname:

*Shay*

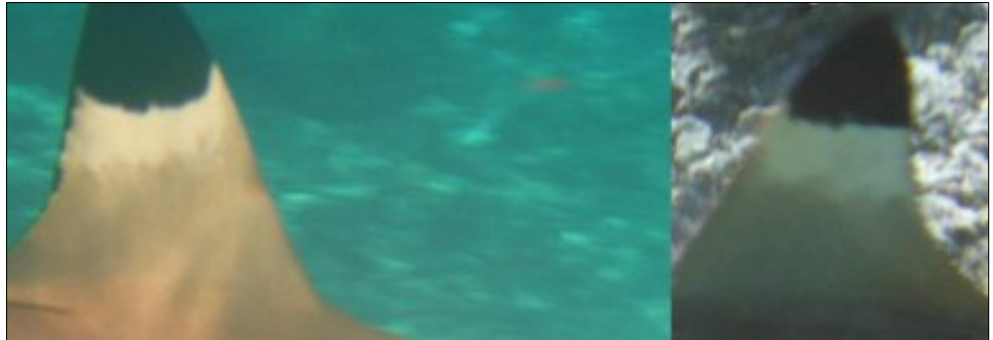

**Description:** Female juvenile; 3.5 feet, bronze.

**Sessions attended:** Z52, z54, z55, z59, z60, z62, z66, z67

## Shark 452

nickname:

*Omega*

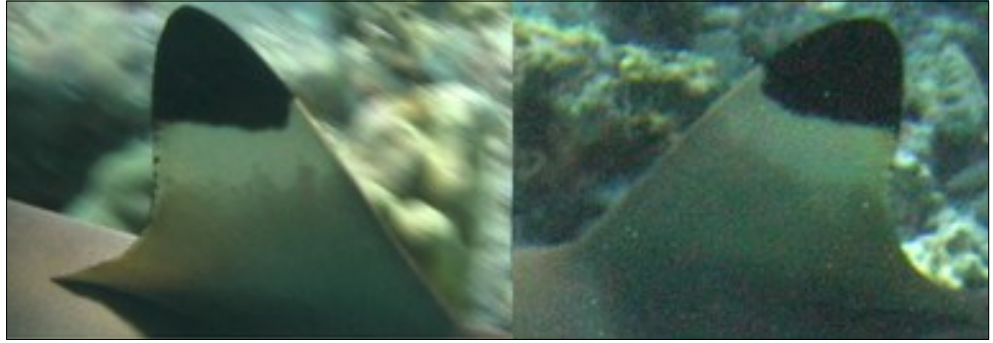

**Description:** Female; 4.5 feet, rich bronze. Four light dots under dorsal fin right side in shape of elongated diamond.

**Sessions attended:** z53, z54, z56, z61, z64, z66, z67

## Shark 453

nickname:

*Darwin*

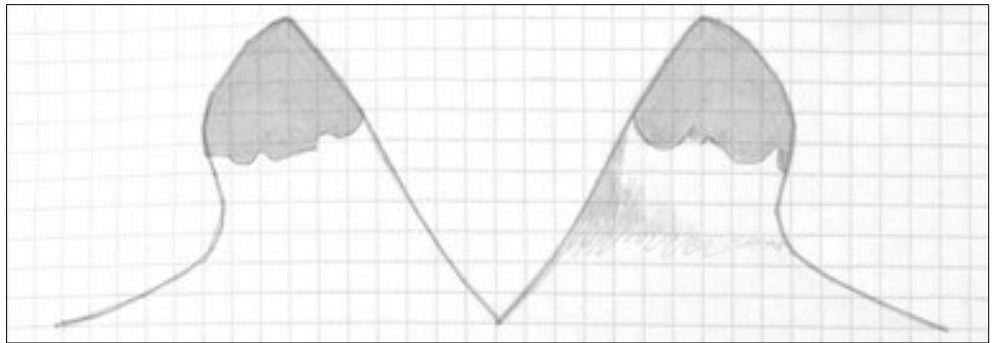

**Description:** Male; 4 feet, dark grey.

**Sessions attended:** B11, Z54, z55

**Comments:** Came to the session just before the shark evacuation, though he had not come to a session before.

## Shark 454

nickname:

*Anatolie*

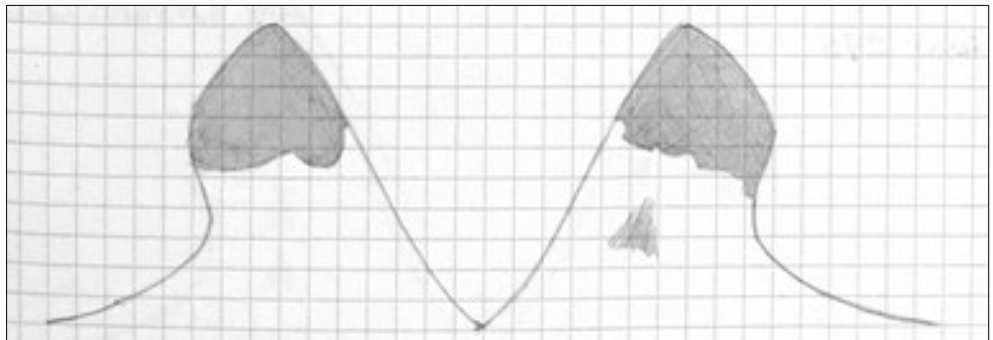

**Description:** Male juvenile; 3 feet, grey.

**Sessions attended:** z54

**Comments:** Claspers about 3" long.

### **Shark 455**

nickname:

*Felicity*

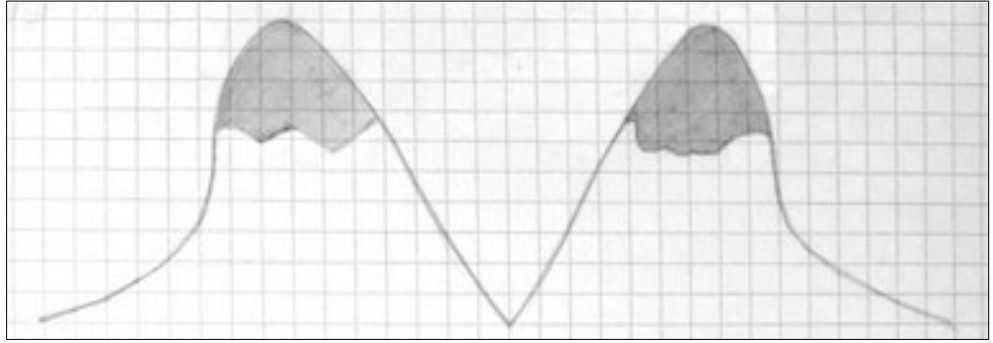

**Description:** Female; 5 feet, ochre.

**Sessions attended:** z54

### **Shark 456**

nickname:

*Aryana*

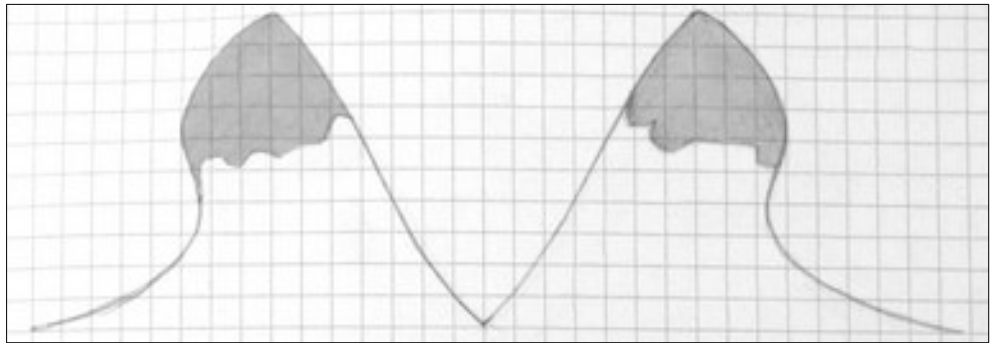

**Description:** Female juvenile; 4 feet, bronze.

**Sessions attended:** z54

### **Shark 457**

nickname:

*Salvador*

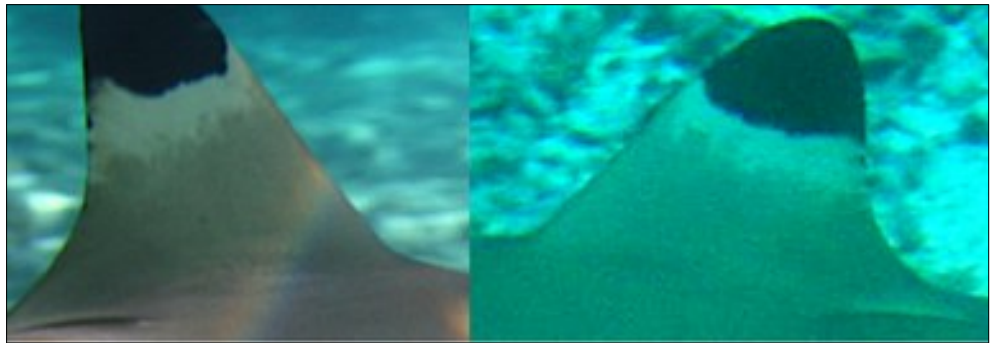

**Description:** Male juvenile; 3.5 feet brown.

**Sessions attended:** Z54, z55, z56, z58



### **Shark 458**

nickname:

*Damien*

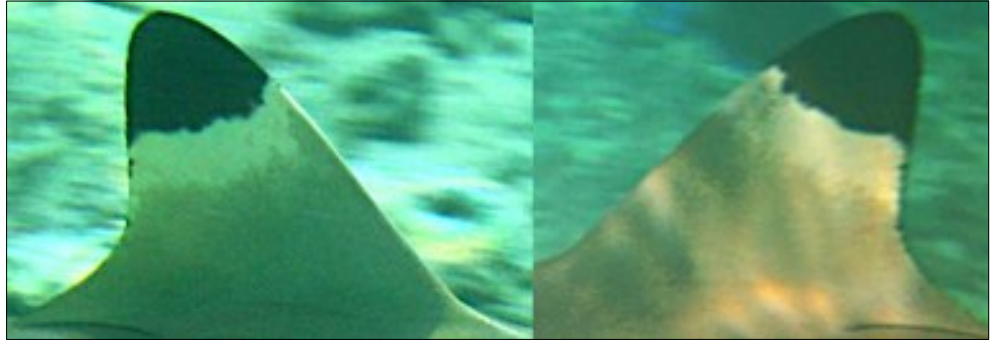

**Description:** Male juvenile; 3 feet, bronze, sometimes more grey.

**Sessions attended:** Z54, z55, z56, z58, z59, z60 z63, z65

### **Shark 459**

nickname:

*Maryloo*

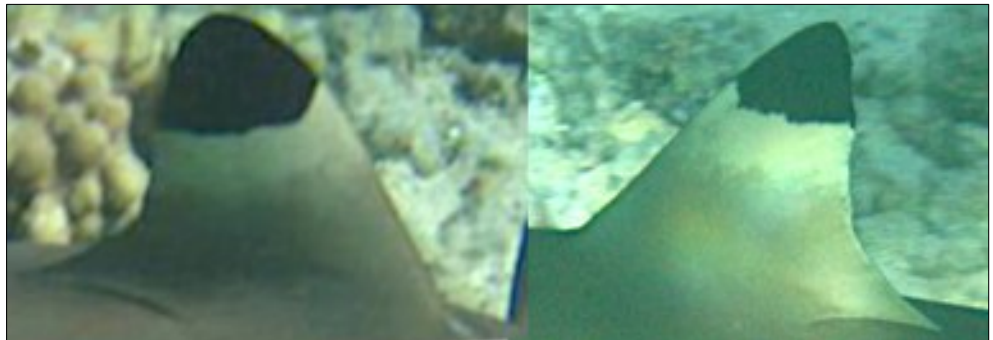

**Description:** Female juvenile; 3.5 feet, brown.

**Sessions attended:** Z55, z56, z62, z66, z67

### **Shark 460**

nickname:

*Marmara*

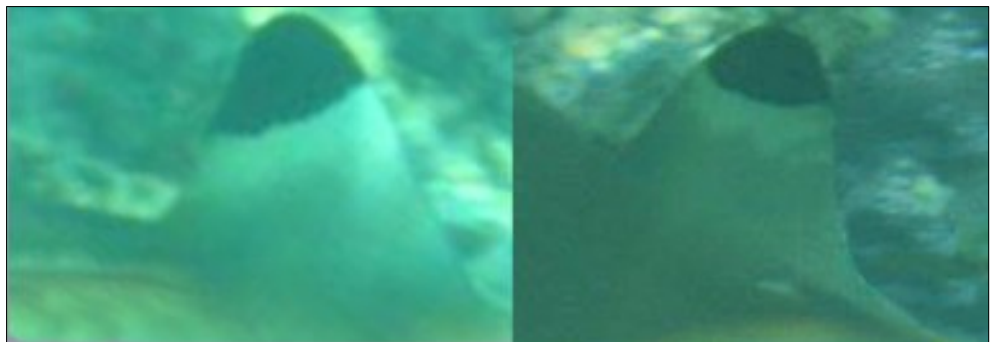

**Description:** Female juvenile; 3.5 feet, brown.

**Sessions attended:** z54, z55

## **Shark 461**

nickname:

*Violetta*

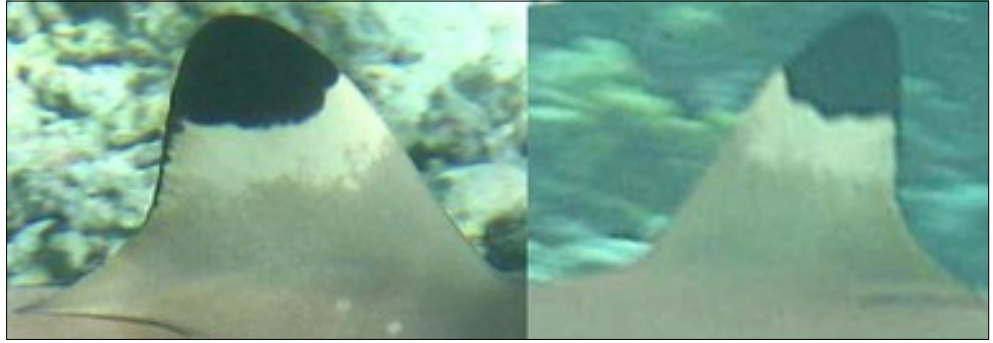

**Description:** Pup; 2.5 feet, bronze.

**Sessions attended:** Z55, z64, z66

## **Shark 462**

nickname:

*Caesar*

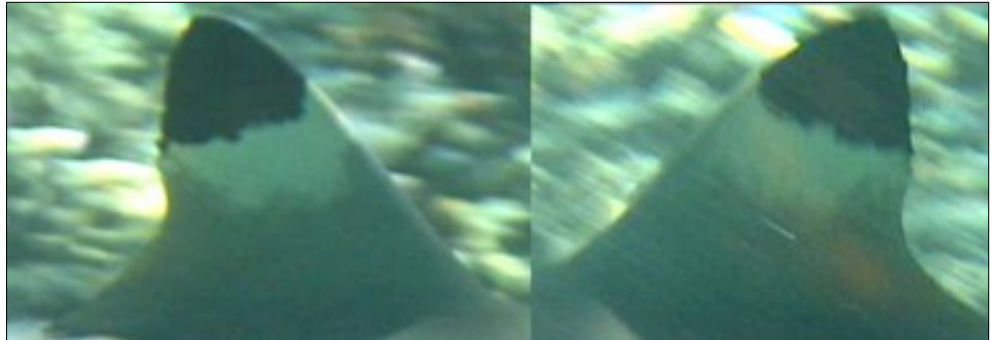

**Description:** Male; 4 feet, brown.

**Sessions attended:** z56, z60

## **Shark 463**

nickname:

*Josephine*

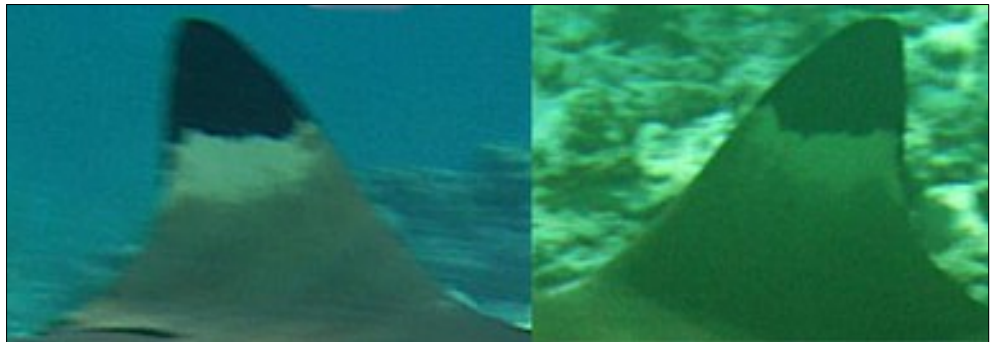

**Description:** Female; 6 feet, dark brown.

**Sessions attended:** z56, z63, z65, z66

**Comments:** Association with Samphire.

## Shark 464

nickname:

*Bear*

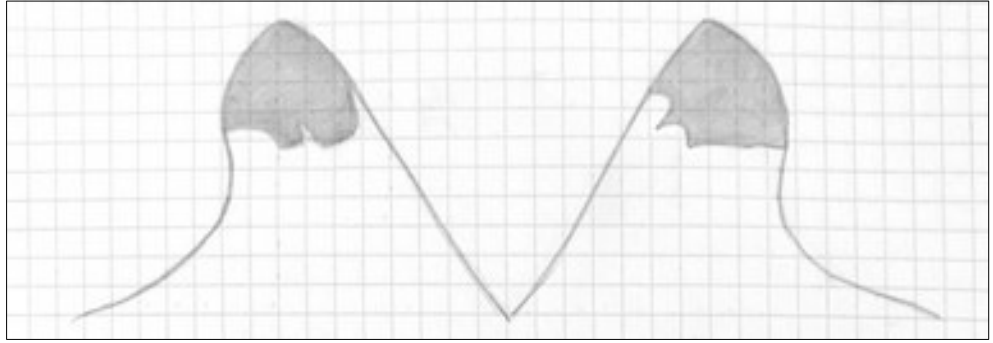

**Description:** Male; 4 feet grey.

**Sessions attended:** z64

**Comments:** Charged me fast on arrival. Seen him before; possibly one of the males that charged me on coming into the site during the wet season.

## Shark 465

nickname:

*Raven*

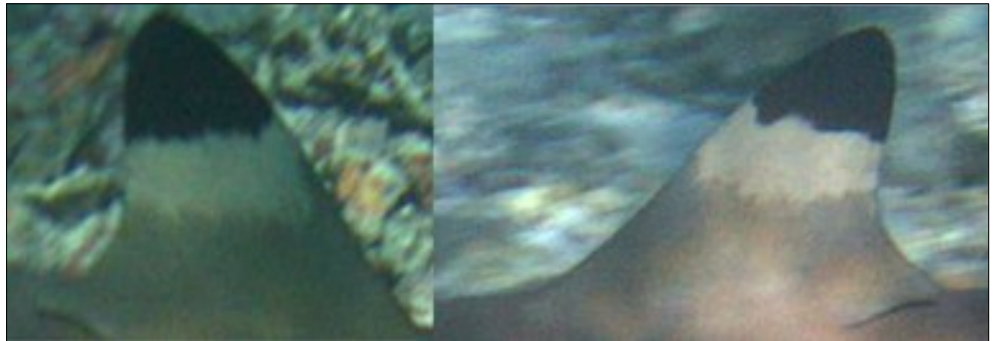

**Description:** Male; 4 feet, brown.

**Sessions attended:** z57

## Shark 466

nickname:

*Elodia*

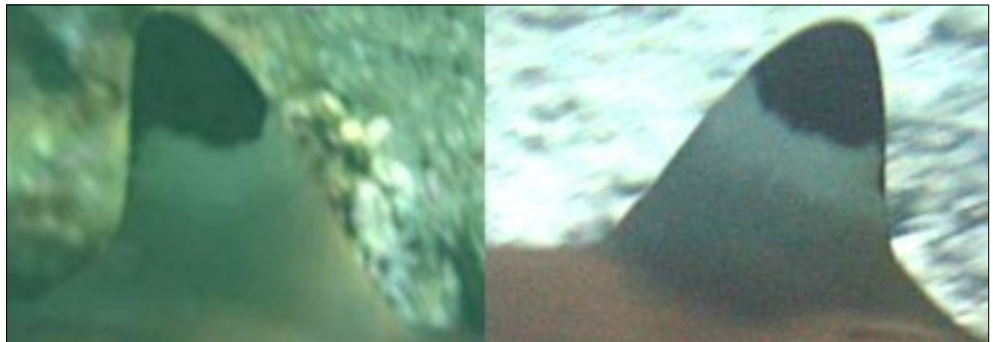

**Description:** Female juvenile; 3 feet, bronze.

**Sessions attended:** z60

## Shark 467

nickname:

*Tooralee*

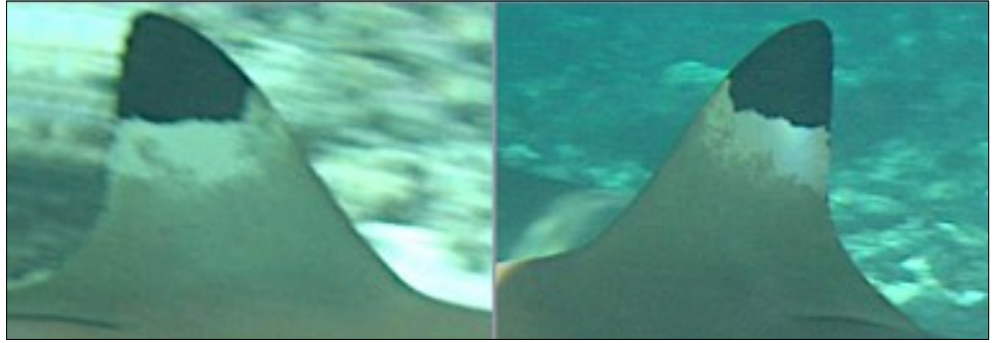

**Description:** Female; five feet, gold.

**Sessions attended:** z57, z61, z62, z63, z64, z65

## Shark 468

Nickname:

*Cocoanut*

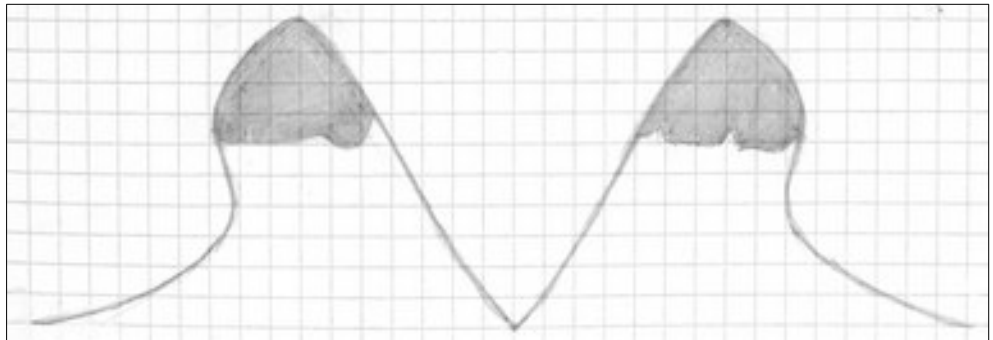

**Description:** Pup; 2 feet, bronze.

**Sessions attended:** B3, B4, B5, B6, B8, B9, B10, B11, B17, B40

## Shark 469

nickname:

*Lorelei*

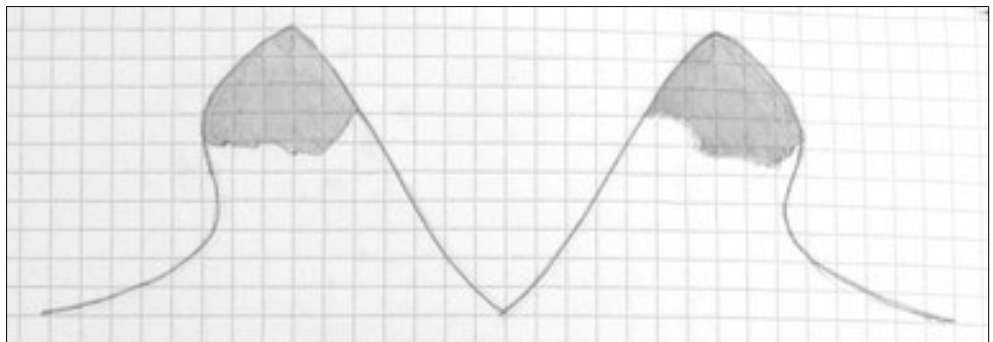

**Description:** Female; 4 feet, plump, ochre.

**Sessions attended:** E1, E3

### **Shark 470**

nickname:

*Lochalsh*

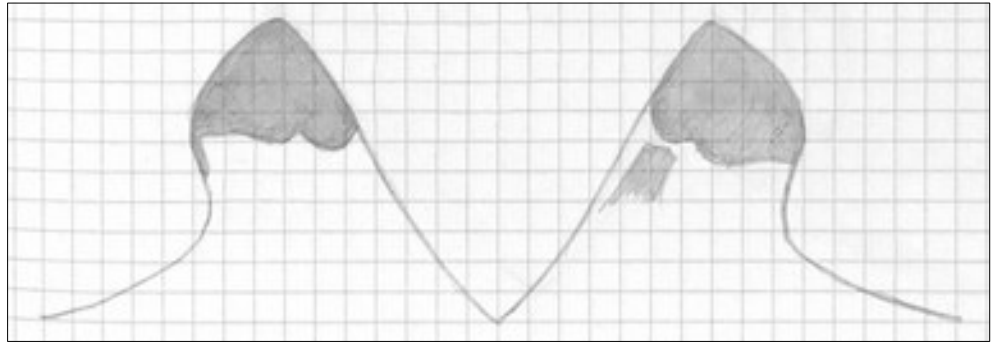

**Description:** Female; 5.5 feet, grey. Light dot base tail, left side.

**Comments:** Was passing swiftly along the reef in parallel with another big female on my arrival at the session that the sharks were in turmoil prior to their evacuation.

### **Shark 471**

nickname:

*Garnet*

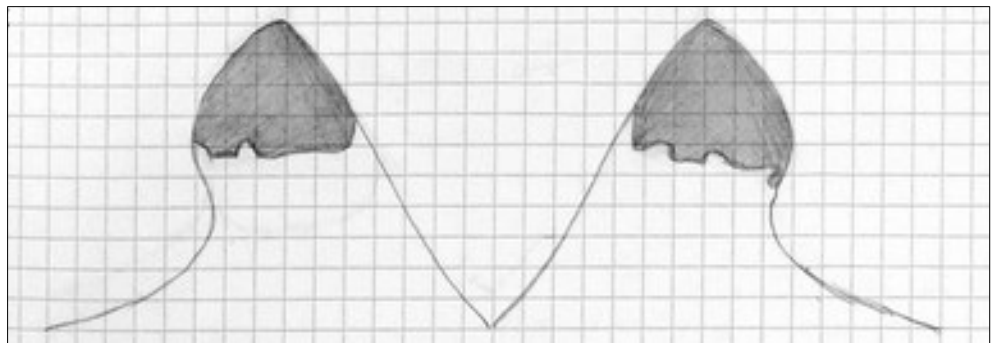

**Description:** Female juvenile; 3.5 feet, brown.

**Sessions attended:** E1, E3, E4

### **Shark 472**

nickname:

*Banshee*

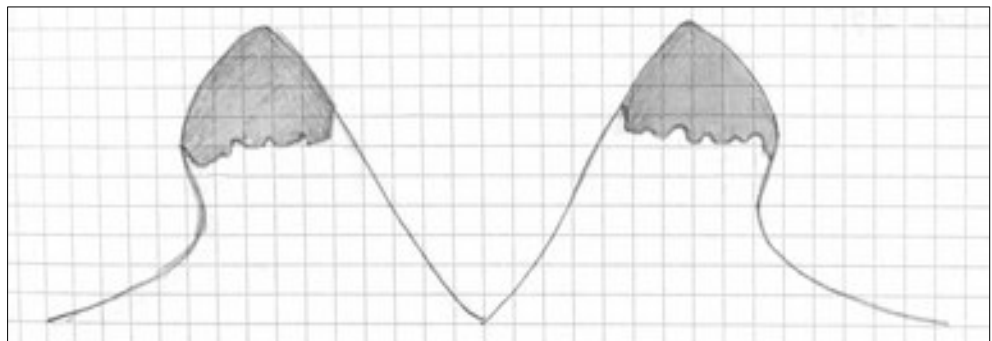

**Description:** Female juvenile; 3 feet, bronze.

**Sessions attended:** E1, E3

## Shark 473

nickname:

*Draconi lookalike*

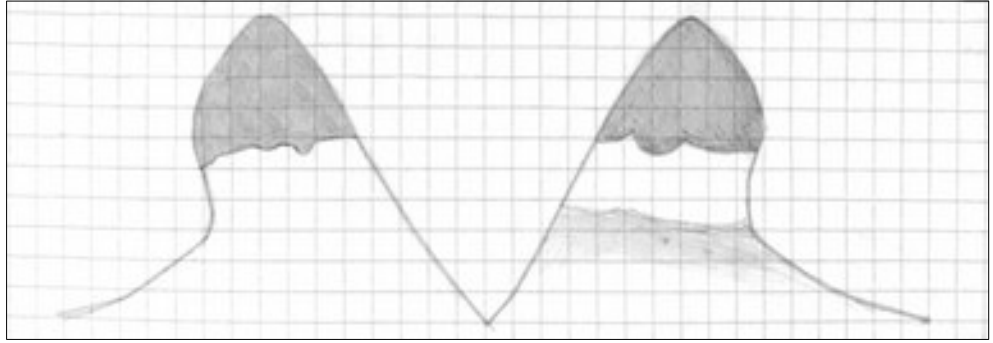

**Description:** Male; 4 feet, ochre.

**Sessions attended:** O5

## Shark 474

nickname:

*Spring*

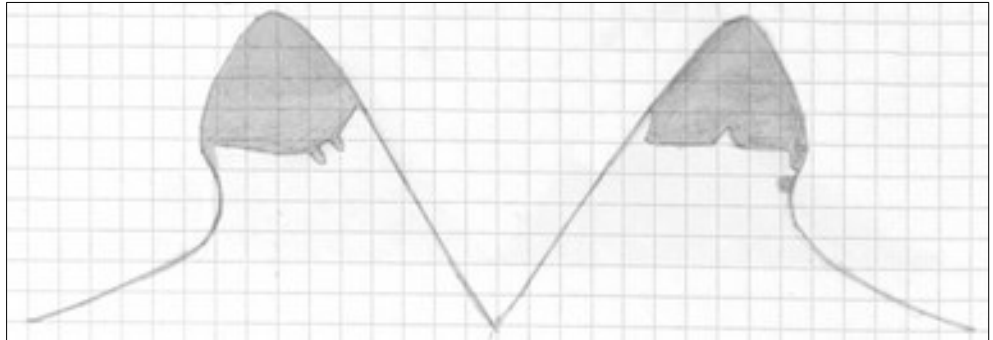

**Description:** Pup; 2 feet, grey.

**Sessions attended:** Never came to a session.

**Comments:** Born in Opunohu nursery in September, 2002
